# Supplementary material for: Metabolomics and Physiological Insights into the Ability of Exogenously Applied Chlorogenic Acid and Hesperidin to Modulate Salt Stress in Lettuce Distinctively
Source: MDPI journal article supplement (doi:10.3390/molecules26206291), 2021-10-18
Supplement: s1 [file s1]

**Table S4.** List of most discriminant metabolites having a variable importance in projection (VIP) score greater than 1.3, extrapolated from the orthogonal projections to latent structures discriminant analysis (OPLS-DA) model. For each compound were reported the compound ontology, VIP score, and standard error.

| Compound name                                                                         | Ontology - parents of class             | VIP score | Standard error |
|---------------------------------------------------------------------------------------|-----------------------------------------|-----------|----------------|
| <i>N</i><sup>6</sup>-(&Delta;<sup>2</sup>-isopentenyl)-adenosine 5'-diphosphate       | Compounds                               | 1,46038   | 0,367011       |
| 1-(5-phospho-&beta;-D-ribose)-AMP                                                     | Modified-Nucleosides                    | 1,45127   | 0,616705       |
| sphinganine (C20)                                                                     | D-erythro-Shinganines                   | 1,44285   | 0,357339       |
| 8-hydroxy-dATP                                                                        | Modified-Nucleotides                    | 1,44199   | 0,675212       |
| cyclo-dopa glucuronosyl glucoside                                                     | Alkaloids                               | 1,44101   | 0,705058       |
| dihydroxyferuloyl-sinapoyl spermidine                                                 | Compounds                               | 1,43063   | 0,563142       |
| di-homo-&gamma;-linolenate                                                            | Omega-6-Fatty-Acids // Eicosatrienoates | 1,42857   | 0,330283       |
| D-<i>myo</i>-inositol (1,2,3,5,6) pentakisphosphate                                   | D-myo-inositol-pentakisphosphates       | 1,39764   | 0,528647       |
| spermine                                                                              | Aliphatic-Alpha-Omega-Diamines          | 1,3976    | 0,527045       |
| (2<i>E</i>,10<i>E</i>,14<i>E</i>,18<i>E</i>)-lycopatetraene                           | Hydrocarbons // Tetraterpenes           | 1,39735   | 0,523227       |
| UDP-3-<i>O</i>-[(3<i>R</i>)-3-hydroxymyristoyl]-<i>N</i>-acetyl-&alpha;-D-glucosamine | UDP-sugar                               | 1,39472   | 0,523865       |
| 6-(<i>all-trans</i>-decaprenyl)-2-methoxy-phenol                                      | 2-Methoxy-6-polyprenyl-phenols          | 1,39458   | 0,522689       |
| CDP-ethanolamine                                                                      | Modified-Nucleotides // Pyrimidines     | 1,38856   | 0,43689        |
| <i>N</i>-(4-aminobenzoyl)-L-glutamate                                                 | Compounds                               | 1,38457   | 0,519525       |
| dihydroisopteroate                                                                    | Pteroates                               | 1,37921   | 0,520611       |
| nitecapone                                                                            | C-nitro-compounds                       | 1,37295   | 0,526361       |
| hemigossypol                                                                          | Sesquiterpenes                          | 1,37057   | 0,490254       |
| 1-stearoyl-<i>sn</i>-glycerol                                                         | 1-Acyl-sn-glycerols                     | 1,36431   | 0,248894       |
| pelargonidin 3-<i>O</i>-(6"-<i>O</i>-maly-&beta;-<i>D</i>-glucoside)                  | Anthocyanins                            | 1,36354   | 0,518353       |
| 3-dehydrosphinganine (C20)                                                            | Fatty acids                             | 1,35455   | 0,301674       |
| 2-succinyl-5-enolpyruvoyl-6-hydroxy-3-cyclohexene-1-carboxylate                       | Compounds                               | 1,35337   | 0,221114       |
| <i>all trans</i>-decaprenyl-2-methoxy-6-1,4-benzoquinol                               | 2-Methoxy-6-Polyprenyl-14-Benzoquinols  | 1,35292   | 0,591587       |
| <i>N</i>-(4-hydroxybenzoyl)-L-glutamate                                               | Monocarboxylic-Acid-Amides              | 1,35054   | 0,507803       |
| UDP-2-N,3-O-bis[(3R)-3-hydroxytetradecanoyl]-&alpha;-D-glucosamine                    | UDP-sugar                               | 1,34445   | 0,446606       |
| isopentenyladenine-7-<i>N</i>-glucoside                                               | Adenine-Cytokinin-Glucosides            | 1,34436   | 0,190895       |
| 7,8-dihydropteroate                                                                   | Pteroates                               | 1,34353   | 0,540559       |
| 2-thiouridine 5'-triphosphate                                                         | Compounds                               | 1,34278   | 0,270898       |

|                                                                                                   |                                           |         |          |
|---------------------------------------------------------------------------------------------------|-------------------------------------------|---------|----------|
| hypericin                                                                                         | Dyes                                      | 1,33244 | 0,266173 |
| isopentenyl adenosine                                                                             | Nucleosides-Analogues                     | 1,32961 | 0,237565 |
| CDP-&alpha;-D-glucose                                                                             | NDP-alpha-D-glucoses // CDP-SUGARS        | 1,32749 | 0,526932 |
| cyclic ADP-ribose                                                                                 | Nucleosides-Analogues                     | 1,32698 | 0,533581 |
| 1,18-octadecane-diol                                                                              | Long-chain-alcohols // Diols              | 1,32516 | 0,355421 |
| lubimin                                                                                           | Sesquiterpenes                            | 1,32411 | 0,305829 |
| capsidiol                                                                                         | Sesquiterpenes                            | 1,32387 | 0,30117  |
| dodecane-1,7-diol                                                                                 | Diols                                     | 1,32324 | 0,278343 |
| soyasaponin I                                                                                     | Soyasaponins // Pentacyclic-triterpenoids | 1,32293 | 0,327683 |
| dopaxanthin quinone                                                                               | ALKALOID                                  | 1,32256 | 0,385137 |
| guanosine tetraphosphate                                                                          | Modified-Nucleotides                      | 1,32126 | 0,275948 |
| lauroyl-CoA                                                                                       | Medium-Chain-234-Saturated-acyl-CoAs      | 1,31932 | 0,230541 |
| (22R,23R)-22,23-dihydroxy-campest-4-en-3-one                                                      | Brassinosteroids                          | 1,31862 | 0,346691 |
| <i>N</i> <sup>1</sup> -acetylspermine                                                             | Aliphatic-N-Acetyl-Diamines               | 1,31848 | 0,875642 |
| 1-(5-phospho-&beta;-D-ribosyl)-5-[(5-phosphoribosylamino)methylideneamino]imidazole-4-carboxamide | Carboxamides                              | 1,31249 | 0,554949 |
| 3-dehydro-6-hydroxyteasterone                                                                     | Brassinosteroids                          | 1,31201 | 0,329677 |
| adenosine 5'-phosphoselenate                                                                      | Compounds                                 | 1,30855 | 0,314754 |
| 3R-hydroxy-lesqueroloyl-CoA                                                                       | All-Coas                                  | 1,30477 | 0,60211  |
| isorhamnetin 3-O-(6"-O-feruloyl)-glucoside                                                        | Flavonol-Derivatives                      | 1,30364 | 0,234924 |
| 1-18:2-2-16:0-digalactosyldiacylglycerol                                                          | Fatty acids                               | 1,30254 | 0,283116 |
