# Supplementary material for: Metabolomics and Physiological Insights into the Ability of Exogenously Applied Chlorogenic Acid and Hesperidin to Modulate Salt Stress in Lettuce Distinctively
Source: MDPI journal article supplement (doi:10.3390/molecules26206291), 2021-10-18
Supplement: s1 [file s1]

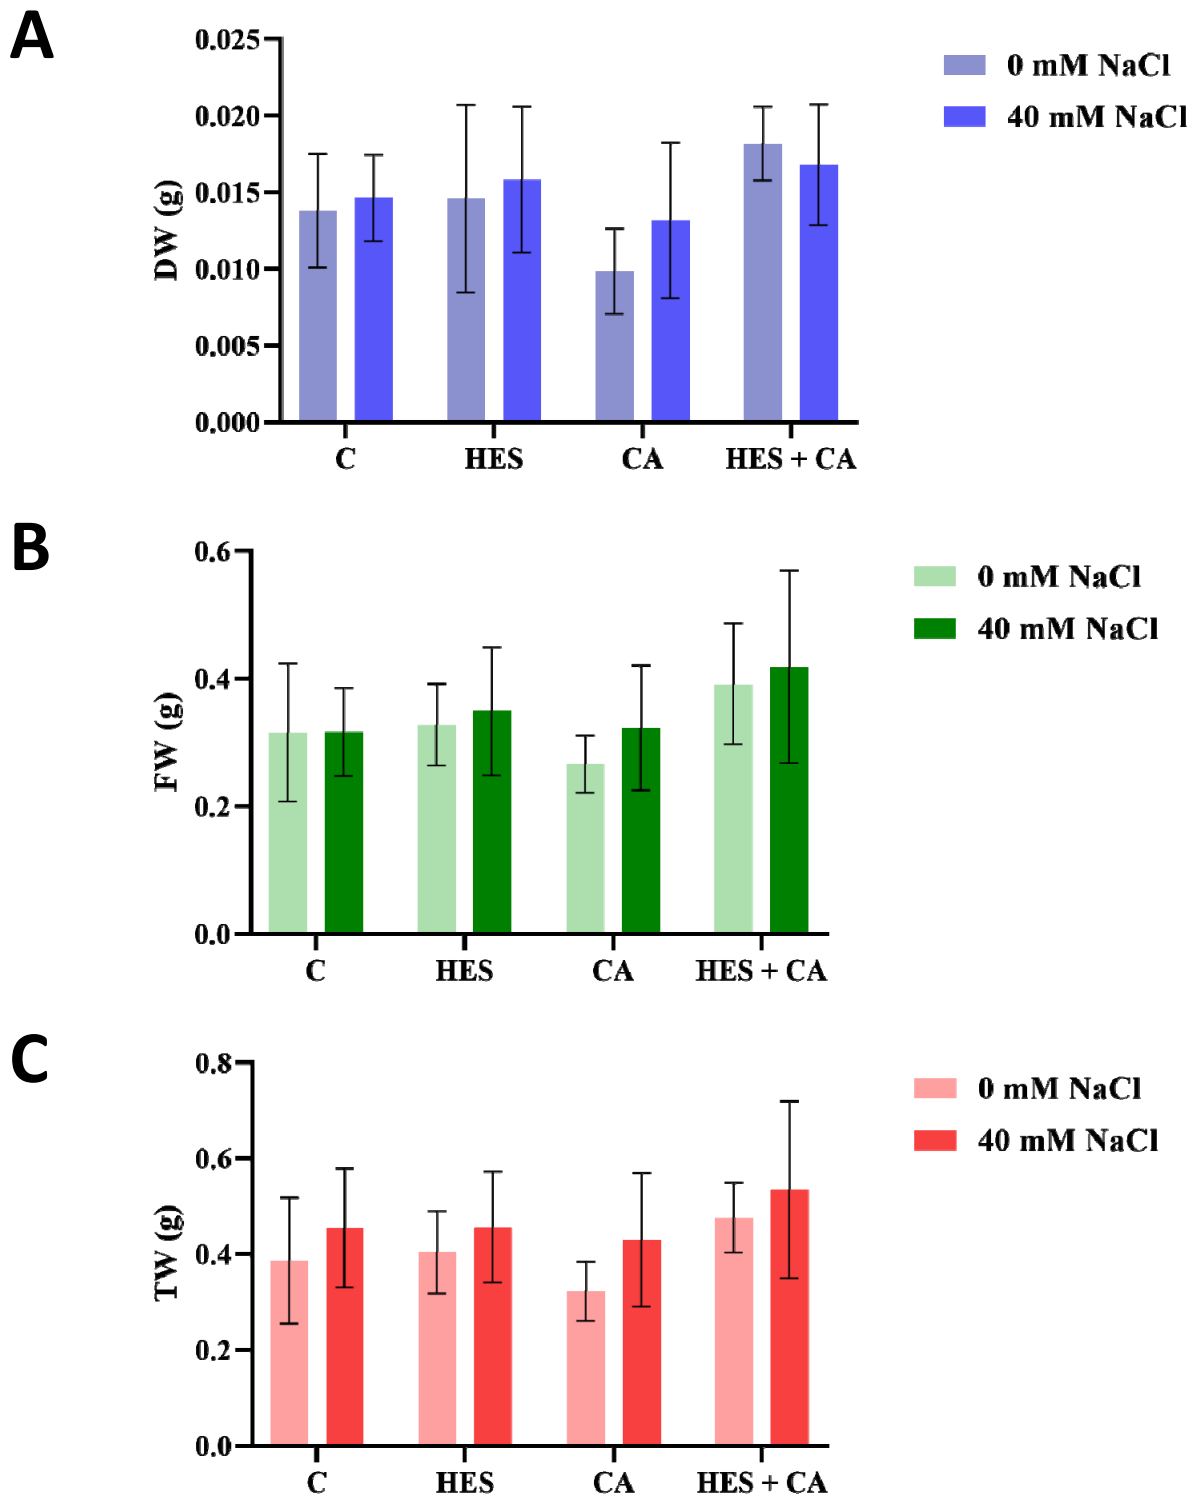

**Figure S1.** (A) Dry weight, (B) Fresh weight and (C) Turgid weight of *Lactuca sativa* after 10 days of treatments, the values are expressed as mean percentage  $\pm$  standard deviation of four independent replicates. The lettuce plants were treated with: control no treated (C), 100  $\mu$ M Hesperidin (HES), 50  $\mu$ M chlorogenic acid (CA), 100  $\mu$ M HES + 50  $\mu$ M CA. Treatments were performed both under salt (40 mM NaCl) and non-salt (0 mM NaCl) stress. The statistical significance has been tested by a one-way ANOVA test with Tukey post-test multiple comparisons ( $p$ -value  $< 0.05$ ) and significant differences between treatments are indicated by lowercase letters above each bar.

**A**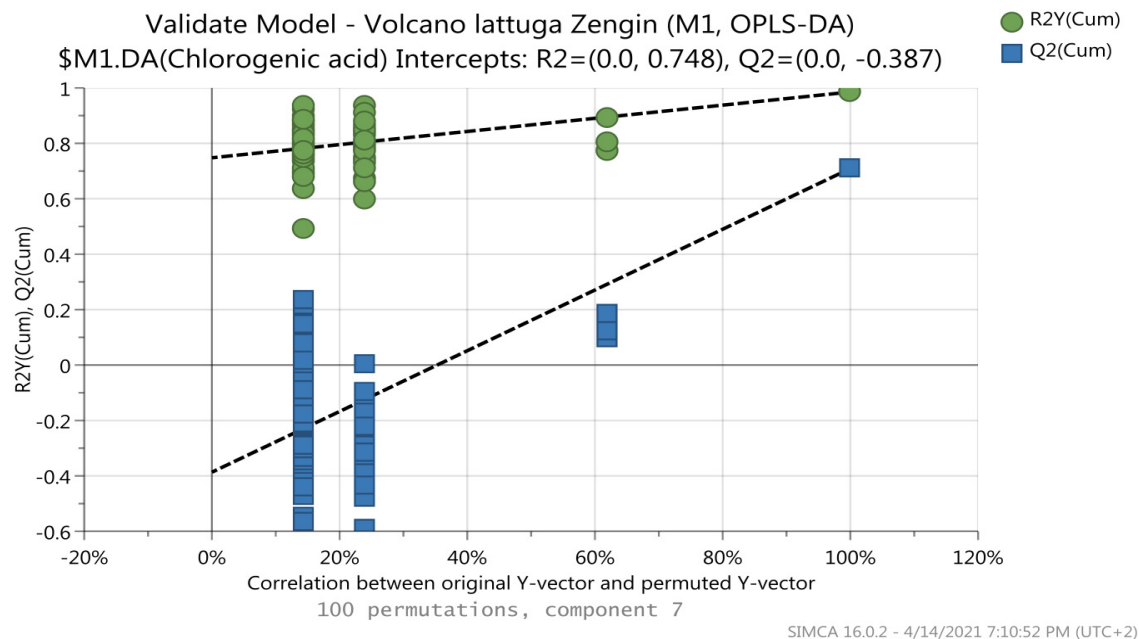**B**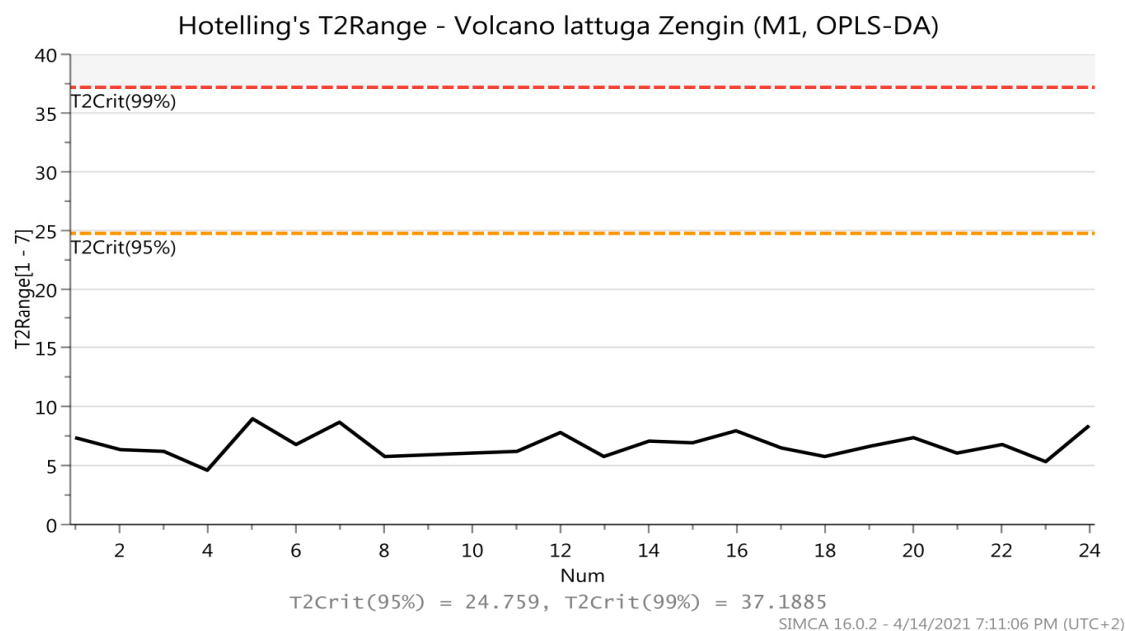

**Figure S2.** Validation of OPLS-DA discriminant model of *Lactuca sativa* after 10 days of treatments with 100  $\mu\text{M}$  Hesperidin (HES), 50  $\mu\text{M}$  chlorogenic acid (CA), 100  $\mu\text{M}$  HES + 50  $\mu\text{M}$  CA. Treatments were performed both under salt (40 mM NaCl) and non-salt (0 mM NaCl) stress. **(A)** permutation testing (N=100), **(B)** Hotelling's T2 using 95% and 99% confidence limits.

**A**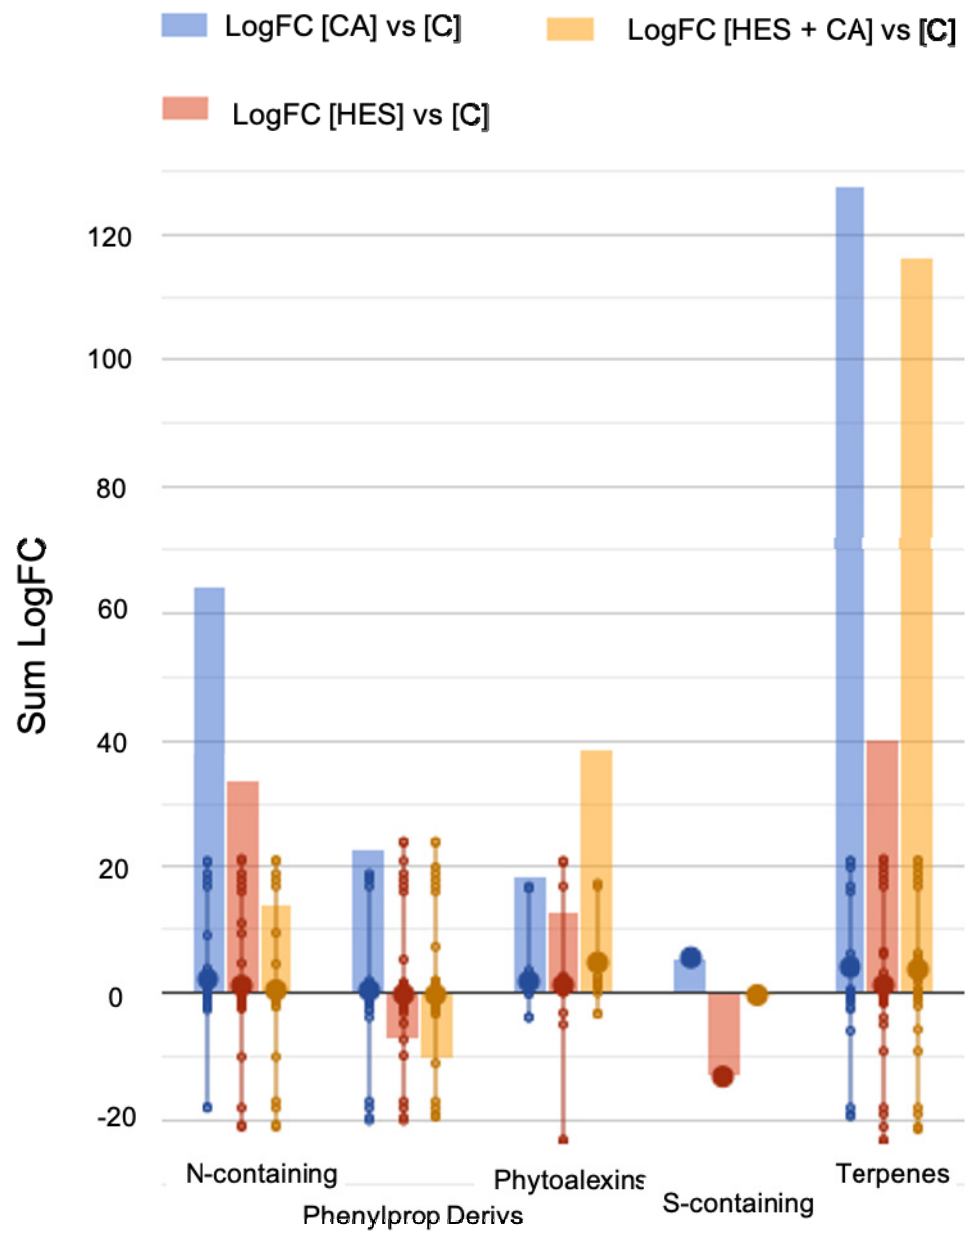

**B**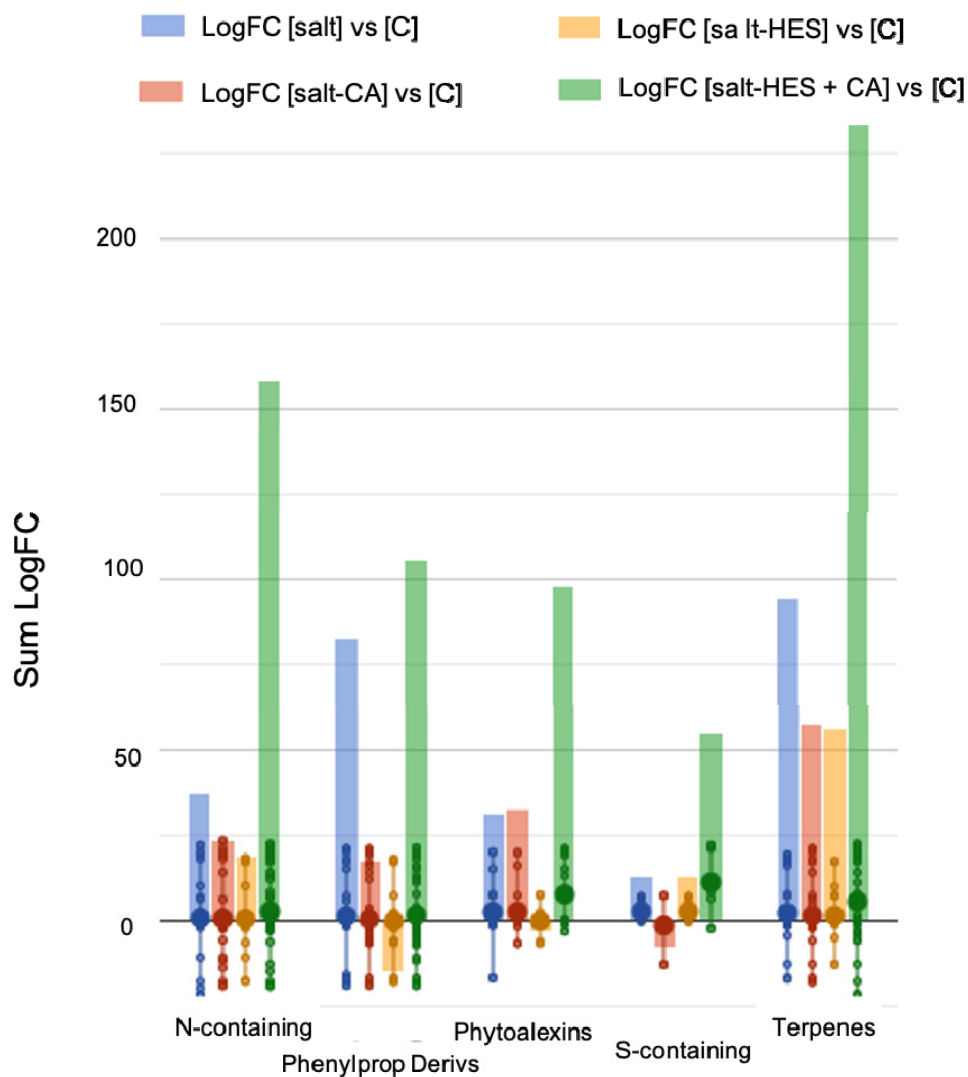

**Figure S3.** Secondary metabolism pathways carried out from lettuce vegetables after 10 days treatments with: 100  $\mu$ M Hesperidin (HES), 50  $\mu$ M chlorogenic acid (CA), 100  $\mu$ M HES + 50  $\mu$ M CA (Mix), grown under non-stressed condition (A) and salt-stressed condition (B). The dataset used to carry out the metabolomic analysis were produced through UHPLC-ESI/QTOF-MS and followed by a selection of compounds that passing Volcano Plot analysis ( $p$ -value < 0.05, fold-change > 1.3) and differential metabolites were loaded into PlantCyc Pathway Tool (<https://www.plantcyc.org/>). The abbreviated subcategory names on the x-axis correspond to: N-containing: nitrogen-containing; Phenylprop Derivs: phenylpropanoids and derivatives; S-containing: sulfur-containing.

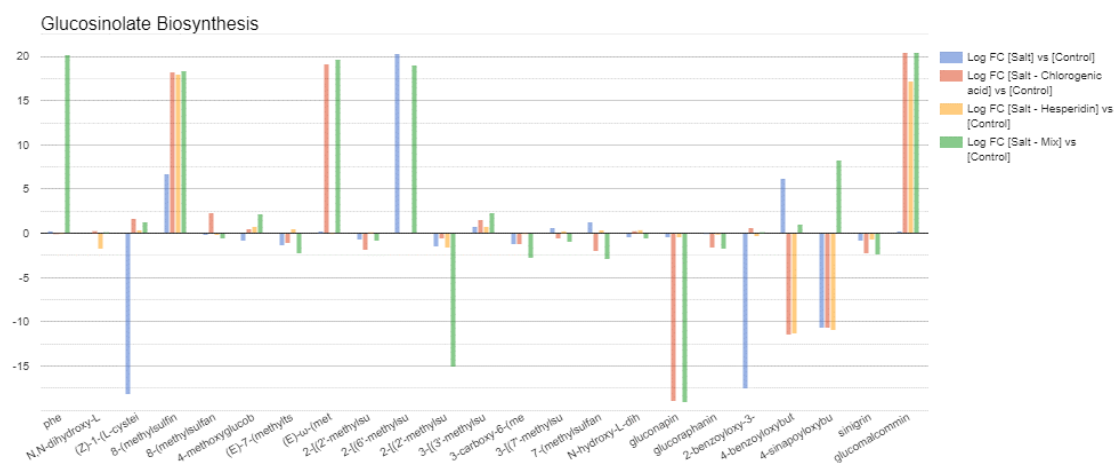

**Figure S4.** Glucosinolates biosynthesis pathway carried out from lettuce vegetables after 10 days treatments with: 100  $\mu$ M Hesperidin (HES), 50  $\mu$ M chlorogenic acid (CA), 100  $\mu$ M HES + 50  $\mu$ M CA (Mix), grown under salt-stressed condition. The dataset used to carry out the metabolomic analysis were produced through UHPLC-ESI/QTOF-MS and followed by a selection of compounds that passing Volcano Plot analysis (p-value < 0.05, fold-change > 1.3) and differential metabolites were loaded into PlantCyc Pathway Tool (<https://www.plantcyc.org/>).
