# Supplementary material for: Metabolomics and Physiological Insights into the Ability of Exogenously Applied Chlorogenic Acid and Hesperidin to Modulate Salt Stress in Lettuce Distinctively
Source: MDPI journal article supplement (doi:10.3390/molecules26206291), 2021-10-18
Supplement: s1 [file s1]

**Table S2.** List of statistically significant metabolites that have passed the one-way analysis of variance (ANOVA) and with Log fold-change (LogFC) values greater than or equal to 1.3, obtained from lettuce samples grown under non-salinity condition. For each compound the category of the compound, the ontology of the compound, LogFC obtained by pairwise comparison between Chlorogenic Acid vs Control, Hesperidin vs Control, and Hesperidin + Chlorogenic Acid vs Control were reported.

| Compound Name                                                                                       | Category                         | Ontology - parents of class                                                          | Log FC [Chlorogenic acid] vs [Control] | Log FC [Hesperidin] vs [Control] | Log FC [Hesperidin+Chlorogenic acid] vs [Control] |
|-----------------------------------------------------------------------------------------------------|----------------------------------|--------------------------------------------------------------------------------------|----------------------------------------|----------------------------------|---------------------------------------------------|
| spermine                                                                                            | Amine and Polyamine Biosynthesis | Aliphatic-Alpha-Omega-Diamines                                                       | -0.06                                  | -0.04                            | 18.73                                             |
| 1,5-diazabicyclononane                                                                              | Amine and Polyamine Degradation  | Compounds                                                                            | -0.06                                  | 17.96                            | 0.05                                              |
| 1-(3-aminopropyl)-pyrrolinium                                                                       | Amine and Polyamine Degradation  | Compounds                                                                            | -1.09                                  | -0.84                            | -1.94                                             |
| 2-iminopropanoate                                                                                   | Amino Acid Biosynthesis          | Imines // Enamines                                                                   | 5.61                                   | -13.11                           | -0.29                                             |
| L-alanine                                                                                           | Amino Acid Biosynthesis          | Amino-Acids-20 // Non-polar-amino-acids // Neutral-Amino-Acids // L-Amino-Acids      | -17.64                                 | -17.57                           | -17.53                                            |
| (2S,4S)-4-hydroxy-2,3,4,5-tetrahydrodipicolinate                                                    | Amino Acid Biosynthesis          | Compounds                                                                            | 2.56                                   | -7.84                            | -11.39                                            |
| L-aspartyl-4-phosphate                                                                              | Amino Acid Biosynthesis          | Modified-Amino-Acids // L-Amino-Acids                                                | -0.06                                  | -0.04                            | 17.46                                             |
| 5-(methylsulfanyl)-ribulose 1-phosphate                                                             | Amino Acid Biosynthesis          | Compounds                                                                            | 1.77                                   | 0.49                             | 0.9                                               |
| 1-(5-phospho- $\beta$ -D-ribose)-AMP                                                                | Amino Acid Biosynthesis          | Modified-Nucleosides                                                                 | 17.1                                   | 0.04                             | 0.05                                              |
| 1-(5-phospho- $\beta$ -D-ribose)-5-[(5-phosphoribosylamino)methylideneamino]imidazole-4-carboxamide | Amino Acid Biosynthesis          | Carboxamides                                                                         | 17.23                                  | 0.04                             | 0.05                                              |
| 1-(5-phospho- $\beta$ -D-ribose)-ATP                                                                | Amino Acid Biosynthesis          | Modified-Nucleosides                                                                 | -0.6                                   | 0.54                             | 1.04                                              |
| 2-oxoadipate                                                                                        | Amino Acid Degradation           | 2-Oxo-carboxylates                                                                   | -16.76                                 | -16.73                           | -16.65                                            |
| UDP- $\beta$ -L-arabinopyranose                                                                     | Carbohydrate Biosynthesis        | UDP-L-arabinopyranose                                                                | -0.62                                  | -0.74                            | -0.51                                             |
| (2E,14E,18E)-lycopatriene                                                                           | Carbohydrate Biosynthesis        | Hydrocarbons // Tetraterpenes                                                        | -18.19                                 | -18.16                           | -18.05                                            |
| dTDP-4-dehydro-6-deoxy- $\beta$ -D-glucopyranose                                                    | Carbohydrate Biosynthesis        | NDP-4-dehydro-6-deoxy-D-glucose // DTDP-SUGARS // DTDP-4-DEHYDRO-6-DEOXY-D-GALACTOSE | -11.97                                 | -6.2                             | -11.91                                            |

|                                                                 |                                             |                                          |        |        |        |
|-----------------------------------------------------------------|---------------------------------------------|------------------------------------------|--------|--------|--------|
| (2E,10E,14E,18E)-lycopatetraene                                 | Carbohydrate Biosynthesis                   | Hydrocarbons // Tetraterpenes            | -0.04  | 18.54  |        |
| formyl-CoA                                                      | Carbohydrates and Carboxylates Degradation  | All-Coas                                 | -18.61 | -18.65 | -18.57 |
| 1,18-octadecane-diol                                            | Cell Structure Biosynthesis                 | Long-chain-alcohols // Diols             | 4.53   | 3.42   | 5.63   |
| (2S)-ethylmalonyl-CoA                                           | Cofactor, Carrier, and Vitamin Biosynthesis | All-Coas                                 | 16.96  | 17.48  | 17.32  |
| 4-aminobenzoate                                                 | Cofactor, Carrier, and Vitamin Biosynthesis | Benzoates                                | 0.91   | 2.56   | -0.08  |
| 7,8-diaminopelargonate                                          | Cofactor, Carrier, and Vitamin Biosynthesis | Compounds                                | -0.86  | -0.67  | -0.88  |
| 1-deoxy-L-glycero-tetrolucose 4-phosphate                       | Cofactor, Carrier, and Vitamin Biosynthesis | Compounds                                | -0.06  | 16.74  | 17.6   |
| 7,8-dihydropteroate                                             | Cofactor, Carrier, and Vitamin Biosynthesis | Pteroates                                | -0.06  | 21.12  | 24.4   |
| 2-succinyl-5-enolpyruvoyl-6-hydroxy-3-cyclohexene-1-carboxylate | Cofactor, Carrier, and Vitamin Biosynthesis | Compounds                                | -0.17  | -4.19  | -4.02  |
| homoglutathione                                                 | Cofactor, Carrier, and Vitamin Biosynthesis | TRIPEPTIDES // All-Glutathiones          | -0.06  | -0.04  | 19.46  |
| (7,8-dihydropterin-6-yl)methyl diphosphate                      | Cofactor, Carrier, and Vitamin Biosynthesis | Pterins                                  | -0.06  | 17.53  | 16.97  |
| CE±-tocotrienol                                                 | Cofactor, Carrier, and Vitamin Biosynthesis | Tocotrienols                             | -2.03  | -2.32  | -2.1   |
| MoO <sub>2</sub> -molybdopterin cofactor                        | Cofactor, Carrier, and Vitamin Biosynthesis | Mo-molybdopterin-cofactor                | -0.44  | -0.65  | -0.17  |
| protoheme                                                       | Cofactor, Carrier, and Vitamin Biosynthesis | Heme-b                                   | 0.87   | 0.34   | 1.31   |
| 6-methoxy-3-methyl-2-all-trans-nonaprenyl-1,4-benzoquinol       | Cofactor, Carrier, and Vitamin Biosynthesis | 6Methoxy5Methyl2Polyprenyl14Benzoquinol  | -0.84  | -0.95  | -0.7   |
| 6-(all-trans-decaprenyl)-2-methoxy-phenol                       | Cofactor, Carrier, and Vitamin Biosynthesis | 2-Methoxy-6-polyprenyl-phenols           | -0.06  | -0.04  | 16.52  |
| 3-hydroxypropanoyl-CoA                                          | Cofactor, Carrier, and Vitamin Biosynthesis | All-Coas                                 | -0.19  | -0.18  | -17.19 |
| 3-methoxy-4-hydroxy-5-all-trans-decaprenylbenzoate              | Cofactor, Carrier, and Vitamin Biosynthesis | 3-Methoxy-4-Hydroxy-5-Polyprenylbenzoate | 0.01   | 17.94  | 0.01   |
| ubiquinol-10                                                    | Cofactor, Carrier, and Vitamin              | Ubiquinols                               | 0.73   | 1.74   | 2.6    |

|                                                                               |                                   |                                                                                    |        |        |        |
|-------------------------------------------------------------------------------|-----------------------------------|------------------------------------------------------------------------------------|--------|--------|--------|
|                                                                               | Biosynthesis                      |                                                                                    |        |        |        |
| UDP-2-N,3-O-bis[(3R)-3-hydroxytetradecanoyl]-Cε±-D-glucosamine                | Fatty Acid and Lipid Biosynthesis | UDP-sugar                                                                          | -0.06  | 16.56  | 0.05   |
| sn-glycerol 3-phosphate                                                       | Fatty Acid and Lipid Biosynthesis | Glycerol-1-phosphate                                                               | -17.1  | -17.08 | -16.99 |
| laurate                                                                       | Fatty Acid and Lipid Biosynthesis | Medium-Chain-234-Saturated-Fatty-Acids // Saturated-Fatty-Acids                    | -0.69  | -1.03  | -1.18  |
| 3-dehydrosphinganine (C18)                                                    | Fatty Acid and Lipid Biosynthesis | CPD-22221                                                                          | -1.68  | -1.98  | -2.45  |
| digitoxigenin                                                                 | Fatty Acid and Lipid Biosynthesis | 3-Beta-Hydroxysterols // Cardenolides                                              | -0.62  | -0.74  | -0.37  |
| 7-dehydrosmosterol                                                            | Fatty Acid and Lipid Biosynthesis | Delta5-Delta7-Steroids // 3-Beta-Hydroxysterols                                    | -0.96  | -1     | -0.57  |
| 4Cε±-methyl-5Cε±-cholesta-8,14,24-trien-3Cε≤-ol                               | Fatty Acid and Lipid Biosynthesis | Delta-14-steroids // 3-Beta-Hydroxysterols                                         | -0.75  | -0.82  | -0.21  |
| CDP-ethanolamine                                                              | Fatty Acid and Lipid Biosynthesis | Modified-Nucleotides // Pyrimidines                                                | 1.26   | 0.77   | -0.77  |
| 4Cε±-carboxy-4Cε≤,14Cε±-dimethyl-9Cε≤,19-cyclo-5Cε±-ergost-24(241)-en-3Cε≤-ol | Fatty Acid and Lipid Biosynthesis | 3beta-hydroxy-4alpha-carboxy-sterols                                               | -0.73  | -1.36  | -0.16  |
| CDP-choline                                                                   | Fatty Acid and Lipid Biosynthesis | Nucleoside-Diphosphocholines                                                       | 0.87   | 1.14   | 1.93   |
| CDP-N-methylethanolamine                                                      | Fatty Acid and Lipid Biosynthesis | Compounds                                                                          | 17.14  | 18.26  | 17.96  |
| 4-(cytidine 5'-diphospho)-2-C-methyl-D-erythritol                             | Fatty Acid and Lipid Biosynthesis | CDP-SUGARS                                                                         | -0.13  | -9.13  | -9.13  |
| UDP-3-O-[(3R)-3-hydroxymyristoyl]-N-acetyl-Cε±-D-glucosamine                  | Fatty Acid and Lipid Biosynthesis | UDP-sugar                                                                          | 16.86  |        |        |
| malonyl-CoA                                                                   | Fatty Acid and Lipid Biosynthesis | All-Coas                                                                           | 16.61  | 17.36  | 17.24  |
| lauroyl-CoA                                                                   | Fatty Acid and Lipid Biosynthesis | Medium-Chain-234-Saturated-acyl-CoAs                                               | -16.66 | -16.63 | -16.54 |
| 11-hydroxydodecanoate                                                         | Fatty Acid and Lipid Biosynthesis | Medium-Chain-234-Saturated-Fatty-Acids // Omega-1-Hydroxy-Medium-Chain-Fatty-Acids | -19.38 | -0.47  | 0.01   |
| cis-12-sulfojasmonate                                                         | Hormone Biosynthesis              | 12-Hydroxyjasmonate-Sulfates                                                       | -0.9   | -2.5   | -8.35  |
| isopentenyladenine-                                                           | Hormone                           | Adenine-Cytokinin-                                                                 | -0.13  | -0.74  | -0.94  |

|                                                                      |                                        |                                                       |        |        |        |
|----------------------------------------------------------------------|----------------------------------------|-------------------------------------------------------|--------|--------|--------|
| 7-N-glucoside                                                        | Biosynthesis                           | Glucosides                                            |        |        |        |
| campest-4-en-3-one                                                   | Hormone Biosynthesis                   | 3-Oxo-Delta-4-Steroids // Brassinosteroids            | -0.83  | -0.97  | -0.61  |
| N6-(C <i>ε</i> 2-isopentenyl)-adenosine 5'-diphosphate               | Hormone Biosynthesis                   | Compounds                                             | 19.54  | 18.83  | 0.05   |
| 16C <i>ε</i> 1,17-epoxy gibberellin A4                               | Hormone Degradation                    | Gibberellins                                          | 0.39   | 0.06   | 0.82   |
| selenate                                                             | Inorganic Nutrient Metabolism          | Inorganic-Anions                                      | -0.06  | 16.72  | 0.05   |
| adenosine 5'-phosphoselenate                                         | Inorganic Nutrient Metabolism          | Compounds                                             | -0.2   | -0.57  | -17.35 |
| 8-oxo-GMP                                                            | Nucleoside and Nucleotide Biosynthesis | All-Nucleosides                                       | -0.05  | -0.99  | -0.99  |
| N1-(5-phospho-C <i>ε</i> 2-D-ribose)glycinamide (GAR)                | Nucleoside and Nucleotide Biosynthesis | Compounds                                             | 1.59   | 2.79   | 2.79   |
| dTMP                                                                 | Nucleoside and Nucleotide Biosynthesis | Pyrimidine-deoxyribonucleoside s-5-P // Pyrimidines   | -1.35  | 0.34   | 0.17   |
| dCDP                                                                 | Nucleoside and Nucleotide Biosynthesis | Pyrimidine-deoxyribonucleoside s-5-PP // Pyrimidines  | 11.16  | 17.57  | 16.77  |
| 5'-phosphoribosyl-4-(N-succinocarboxamide)-5-aminoimidazole (SAICAR) | Nucleoside and Nucleotide Biosynthesis | Compounds                                             | -0.48  | -6.88  | -1.54  |
| dTTP                                                                 | Nucleoside and Nucleotide Biosynthesis | Pyrimidine-deoxyribonucleoside s-5-PPP // Pyrimidines | 0.03   | -17    | -17    |
| CTP                                                                  | Nucleoside and Nucleotide Biosynthesis | Pyrimidine-ribonucleosides-5-PPP // Pyrimidines       | 17.19  | -0.03  | 0.05   |
| hypoxanthine                                                         | Nucleoside and Nucleotide Degradation  | Purine-Bases // All-Nucleosides                       | -26.87 | -26.84 | -26.76 |
| (S)-1-pyrroline-5-carboxylate                                        | Other Biosynthesis                     | CPD-478                                               | 6.25   | -0.04  | 17.21  |
| dehydrospermidine                                                    | Other Biosynthesis                     | Aliphatic-Alpha-Omega-Diamines                        | -10.86 | -0.81  | -20.32 |
| shikimate 3-phosphate                                                | Other Biosynthesis                     | Compounds                                             | -17.79 | -0.19  | -0.73  |
| Mg-protoporphyrin                                                    | Other Biosynthesis                     | Porphyrins // Organometallics                         | 1.29   | 1.29   | 2.07   |
| 3,8-divinyl chlorophyllide a                                         | Other Biosynthesis                     | Chlorophyllides // Organometallics                    | -1.61  | -20.1  | -20.02 |
| tetrahydrogeranylgerynyl chlorophyll a                               | Other Biosynthesis                     | Organometallics                                       | 0.3    | -13.08 | -5.25  |
| 4-hydroxybenzoyl-                                                    | Other Biosynthesis                     | All-Coas                                              | -0.06  | 17.48  | 17.65  |

|                                  |                    |                                           |        |        |        |
|----------------------------------|--------------------|-------------------------------------------|--------|--------|--------|
| CoA                              |                    |                                           |        |        |        |
| chlorophyll b                    | Other Biosynthesis | Chlorophylls // Organometallics           | 5.41   | 1.59   | 5.43   |
| cyclohexylamine                  | Other Pathways     | Compounds                                 | -0.09  | -0.59  | -0.76  |
| sarcosine                        | Other Pathways     | N-methylated-Amino-Acids                  | 1.24   | -17.57 | 1.78   |
| 2-furoate                        | Other Pathways     | Compounds                                 | -0.57  | -19.83 | -19.83 |
| (2E)-2-hydroxypenta-2,4-dienoate | Other Pathways     | Compounds                                 | -16.69 | -0.43  | -8.45  |
| L-2,4-diaminobutanoate           | Other Pathways     | L-Amino-Acids                             | -1.5   | -19.29 | -1.1   |
| arsenite                         | Other Pathways     | Compounds                                 | 13.78  | 4      | 0.79   |
| methylmethanethiosulfonate       | Other Pathways     | Compounds                                 | -6.97  | -3.87  | -7.46  |
| 4-guanidinobutyraldehyde         | Other Pathways     | Compounds                                 | -0.05  | -0.56  | -2.72  |
| triethanolamine                  | Other Pathways     | Non-Metabolic-Compounds                   | -0.7   | -0.89  | -1.14  |
| pteridine-ring                   | Other Pathways     | Rings                                     | -0.66  | 0.19   | 0.08   |
| cinnamyl alcohol                 | Other Pathways     | Compounds                                 | 0.28   | 0.2    | 0.74   |
| 3-chlorobenzaldehyde             | Other Pathways     | Aryl-Aldehyde // Chloroaromatic-Compounds | 0.39   | -20.6  | 1.19   |
| phenylthiourea                   | Other Pathways     | Compounds                                 | -9.11  | 11.12  | 13.17  |
| 6-isobutyl-4-hydroxy-2-pyrone    | Other Pathways     | OXYGEN-HETEROCYCLES                       | -4.79  | -0.81  | -0.91  |
| L-phosphinothricin               | Other Pathways     | Phosphinates                              | -0.95  | -0.91  | -8.08  |
| (E)-geranylacetone               | Other Pathways     | Terpenoid-Derivatives                     | -0.37  | 2.99   | -1.02  |
| N-prenylagmatine                 | Other Pathways     | Compounds                                 | -0.62  | -18.53 | -0.28  |
| (-)-cuparene                     | Other Pathways     | Sesquiterpenes                            | -19.1  | -0.27  | -19.1  |
| (-)-methyl jasmonate             | Other Pathways     | Methyl-Jasmonates                         | -0.06  | 19.5   | 0.05   |
| 4-phosphooxy-L-threonine         | Other Pathways     | Compounds                                 | 0.18   | 0.58   | 0.1    |
| D,L-5-fluorotryptophan           | Other Pathways     | Compounds                                 | -0.16  | 0.42   | -0.14  |
| sterone-ring                     | Other Pathways     | Rings                                     | -19.05 | -19.05 | -10.73 |
| indolepropanol phosphate         | Other Pathways     | Indole-Derivatives                        | 0.29   | 1.26   | 0.54   |
| (S)-tetrahydroprotoberberine     | Other Pathways     | Compounds                                 | -0.36  | -0.58  | -0.13  |
| hypusine                         | Other Pathways     | Amino-Acid-Derivatives // L-Amino-Acids   | -8.37  | 1.74   | 10.69  |
| N1-acetylspermine                | Other Pathways     | Aliphatic-N-Acetyl-Diamines               | -0.1   | -0.53  | 5.39   |
| 15-hydroxypentadecanoate         | Other Pathways     | Compounds                                 | 1.37   | 1.88   | 3.97   |

|                                                                                        |                |                                                             |       |        |       |
|----------------------------------------------------------------------------------------|----------------|-------------------------------------------------------------|-------|--------|-------|
| N-(4-aminobenzoyl)-L-glutamate                                                         | Other Pathways | Compounds                                                   | -1.34 | -1.12  | 1.26  |
| nitecapone                                                                             | Other Pathways | C-nitro-compounds                                           | -0.05 | 0.1    | 2.58  |
| N-(4-hydroxybenzoyl)-L-glutamate                                                       | Other Pathways | Monocarboxylic-Acid-Amides                                  | 19.39 | 19.54  | 22.02 |
| 7-methylinosine                                                                        | Other Pathways | Modified-Nucleosides                                        | -0.44 | -0.52  | -0.57 |
| 1-monopalmitoylethylene glycol                                                         | Other Pathways | Compounds                                                   | -5.64 | -1.8   | -5.4  |
| octyl $\alpha$ -D-glucopyranoside                                                      | Other Pathways | Glycolipids                                                 | -0.45 | -1.16  | -0.71 |
| 4-[(4E,6E)-3-oxo-7-phenylhepta-4,6-dien-1-yl]cyclohexa-3,5-diene-1,2-dione             | Other Pathways | Compounds                                                   | 0.77  | -20.02 | 1.49  |
| (4E,8E)-sphinga-4,8-dienine                                                            | Other Pathways | Sphingadienine                                              | -1.46 | -2.08  | -2.03 |
| di-homo- $\alpha$ -linolenate                                                          | Other Pathways | Omega-6-Fatty-Acids // Eicosatrienoates                     | 1.03  | -0.32  | 0.99  |
| icosatetraenoate                                                                       | Other Pathways | Long-Chain-234-Saturated-Fatty-Acids // Omega-3-Fatty-Acids | -0.76 | -1.27  | -1.63 |
| sphinganine (C20)                                                                      | Other Pathways | D-erythro-Shinganines                                       | -1.36 | -1.3   | 0.47  |
| 5'-(aminoiminomethyl)amino-5'-deoxyadenosine                                           | Other Pathways | Compounds                                                   | -0.23 | -0.95  | -0.77 |
| phytanate                                                                              | Other Pathways | Saturated-Fatty-Acids // 3-Methyl-Saturated-Fatty-Acids     | 27.06 | 17.88  | 26.85 |
| diphosphoglycolyl proline                                                              | Other Pathways | Compounds                                                   | 0.01  | -0.83  | -0.46 |
| 2'-deoxyadenosine 3'-monophosphate                                                     | Other Pathways | Purine-deoxyribonucleotides // Deoxy-Ribonucleoside-3P      | 0.02  | 1.81   | 1.87  |
| 3'-ketolactose                                                                         | Other Pathways | Carbohydrate-Derivatives                                    | 1.05  | -17.89 | -17.8 |
| 9-[6(RS)-C-carboxamido-5,6,7-trideoxy- $\alpha$ -D-ribooctofuranosyl]-9H-purin-6-amine | Other Pathways | Compounds                                                   | -0.18 | -1.03  | 0.56  |
| guanosine 3'-monophosphate (3'-GMP)                                                    | Other Pathways | 3-Phosphomonucleotides // All-Nucleosides                   | -0.06 | -0.04  | 17.51 |
| 2-(3-benzoylphenyl)-3,5,7-                                                             | Other Pathways | Flavonol-Derivatives                                        | -0.11 | -1.47  | -1.41 |

|                                                                        |                |                                        |       |        |        |
|------------------------------------------------------------------------|----------------|----------------------------------------|-------|--------|--------|
| trihydroxychromen-4-one                                                |                |                                        |       |        |        |
| 1,2-diocanoyl-3-methyl-1,2,3-butanetriol                               | Other Pathways | Compounds                              | 2.25  | 2.56   | 2.91   |
| 1-stearoyl-sn-glycerol                                                 | Other Pathways | 1-Acyl-sn-glycerols                    | -0.81 | -0.53  | -0.23  |
| 7-O- $\beta$ -D-glucosyl-7-hydroxyflavone                              | Other Pathways | Flavones                               | -0.33 | 2.76   | 2.83   |
| 5,5'-dithio-bis-2-nitrobenzoate                                        | Other Pathways | C-nitro-compounds                      | 16.85 | 16.23  | 16.63  |
| 3,5-dihydroxy-6,7-didehydro-12'-apo- $\beta$ -caroten-12'-al           | Other Pathways | 12-apo-Carotenals                      | -0.01 | 0.02   | -0.51  |
| tetrahydrothiamine diphosphate                                         | Other Pathways | ORGANOSULFUR                           | 17.77 | 16.97  | 0.05   |
| 5'-(p-nitrophenyl)thioadenosine                                        | Other Pathways | C-nitro-compounds                      | -6.69 | -19.26 | -19.26 |
| 2,4-diamino-6-ethyl-5,3'-(2-cyclohexylphenoxy)prop-1'-ylloxypyrimidine | Other Pathways | Compounds                              | 0.43  | 0.3    | 1.17   |
| 2'-methoxythiamine pyrophosphate                                       | Other Pathways | Compounds                              | 17.96 | -0.04  | 0.05   |
| scutellarin                                                            | Other Pathways | Flavones                               | 0.77  | -16.84 | -16.75 |
| 8-hydroxy-dATP                                                         | Other Pathways | Modified-Nucleotides                   | 17.23 | -0.04  | 0.05   |
| 2-thiouridine 5'-triphosphate                                          | Other Pathways | Compounds                              | -0.43 | -0.62  | -0.16  |
| N10-(bromoacetyl)-5,8-dideazafolate                                    | Other Pathways | Bromoaromatic-Compounds                | -0.03 | -16.89 | -16.8  |
| CDP- $\beta$ -D-glucose                                                | Other Pathways | NDP-alpha-D-glucoses // CDP-SUGARS     | -0.35 | -0.51  | -0.51  |
| uridine-5'-diphosphate bromoacetyl                                     | Other Pathways | Bromoaromatic-Compounds // Pyrimidines | -0.5  | -0.59  | -0.17  |
| all-trans-phytoene                                                     | Other Pathways | carotenoids                            | 17.35 | 17.19  | 8.6    |
| guanosine tetraphosphate                                               | Other Pathways | Modified-Nucleotides                   | -0.6  | -0.67  | -0.49  |
| pheophorbide b                                                         | Other Pathways | Chlorins                               | 0.25  | 0.01   | 0.84   |
| p-(bromoacetamido)phenyl uridyl pyrophosphate                          | Other Pathways | Bromoaromatic-Compounds                | -0.79 | -0.84  | -0.7   |
| cyclobis-(1,6)- $\beta$ -nigerosyl                                     | Other Pathways | Tetrasaccharides                       | -0.2  | -1.47  | -6.09  |
| zaragozic acid C                                                       | Other Pathways | Compounds                              | 16.88 | 18.03  | 17.8   |
| all-trans-undecaprenyl group                                           | Other Pathways | Polyprenol-Groups                      | 5.62  | 17.1   | -0.02  |
| ubiquinone-9                                                           | Other Pathways | Ubiquinones                            | 0.64  | -0.05  | -5.93  |
| 1,2-dipalmitoylphosphatidylglycerol                                    | Other Pathways | L-1-PHOSPHATIDYL-                      | 10.91 | 18.14  | 18.41  |

|                                                                |                                         |                                                                             |        |        |        |
|----------------------------------------------------------------|-----------------------------------------|-----------------------------------------------------------------------------|--------|--------|--------|
| l-phosphate                                                    |                                         | GLYCEROL-P                                                                  |        |        |        |
| phosphatidylglycero<br>phosphate<br>(dioctadec-9-<br>enoyl(Z)) | Other Pathways                          | L-1-<br>PHOSPHATIDYL-<br>GLYCEROL-P                                         | 18.43  | 18.75  | 18.02  |
| cytochrome c                                                   | Other Pathways                          | Compounds                                                                   | 18.09  | 17.96  | 17.81  |
| ferroheme o                                                    | Other Pathways                          | HEME_O                                                                      | 16.57  | 16.93  | 17.05  |
| maltopentaose                                                  | Other Pathways                          | Linear-Malto-<br>Oligosaccharides                                           | -17.53 | -0.17  | 0.18   |
| ubiquinone-10                                                  | Other Pathways                          | Ubiquinones                                                                 | -0.05  | -0.05  | -1.24  |
| N-<br>methylaminobutanal                                       | Secondary<br>Metabolite<br>Biosynthesis | Compounds                                                                   | 9.1    | 9.45   | 9.51   |
| propyl acetate                                                 | Secondary<br>Metabolite<br>Biosynthesis | Acetate-esters                                                              | -19.55 | -19.53 | -19.44 |
| (2S)-<br>methylbutanenitrile                                   | Secondary<br>Metabolite<br>Biosynthesis | Nitriles                                                                    | 0.08   | -0.45  | 0.39   |
| hexanoate                                                      | Secondary<br>Metabolite<br>Biosynthesis | Medium-Chain-234-<br>Saturated-Fatty-<br>Acids // Saturated-<br>Fatty-Acids | -0.66  | -0.9   | -1.16  |
| tropinone                                                      | Secondary<br>Metabolite<br>Biosynthesis | Compounds                                                                   | -2.56  | -2.2   | -2.01  |
| 2-phenylethylamine                                             | Secondary<br>Metabolite<br>Biosynthesis | Aralkylamines                                                               | -2.68  | -2.54  | -2.08  |
| CE≥-coniceine                                                  | Secondary<br>Metabolite<br>Biosynthesis | ALKALOID                                                                    | -17.79 | -17.79 | -17.79 |
| 4-coumaraldehyde                                               | Secondary<br>Metabolite<br>Biosynthesis | Phenylpropanoids                                                            | -0.56  | -3.12  | -3.12  |
| 3,4-<br>dihydrocoumarin                                        | Secondary<br>Metabolite<br>Biosynthesis | Aromatics                                                                   | -0.06  | 23.89  | 23.88  |
| (+)-carvone                                                    | Secondary<br>Metabolite<br>Biosynthesis | Carvones                                                                    | -0.31  | -21.48 | -21.39 |
| (3E)-4,8-<br>dimethylnona-1,3,7-<br>triene                     | Secondary<br>Metabolite<br>Biosynthesis | Homoterpenoids                                                              | -19.33 | -19.33 | -19.33 |
| (E)-7-<br>(methylsulfanyl)he<br>ptanal oxime                   | Secondary<br>Metabolite<br>Biosynthesis | CPD-19472                                                                   | 0.6    | -0.82  | 0.53   |
| 3,6-dihydronicotine                                            | Secondary<br>Metabolite<br>Biosynthesis | ALKALOID                                                                    | -0.3   | -10.01 | -10.01 |
| CE≤-fenchene                                                   | Secondary<br>Metabolite<br>Biosynthesis | Compounds                                                                   | 6.21   | 6.46   | 6.35   |
| 2-tridecanone                                                  | Secondary<br>Metabolite                 | Methylketones                                                               | -0.06  | -0.04  | 17.14  |



|                                                                           |                                   |                                   |       |        |       |
|---------------------------------------------------------------------------|-----------------------------------|-----------------------------------|-------|--------|-------|
|                                                                           | Biosynthesis                      |                                   |       |        |       |
| ayapin                                                                    | Secondary Metabolite Biosynthesis | Coumarins                         | 18.02 | -0.04  | 0.05  |
| harmaline                                                                 | Secondary Metabolite Biosynthesis | ALKALOID                          | 0.1   | 0.65   | 0.78  |
| trans-resveratrol                                                         | Secondary Metabolite Biosynthesis | Phytoalexins // Polyphenols       | 1.45  | 1.68   | 2.03  |
| germacra-1(10),4,11(13)-trien-12-oate                                     | Secondary Metabolite Biosynthesis | Sesquiterpenes                    | 0.09  | 1.03   | 0.4   |
| sinapaldehyde                                                             | Secondary Metabolite Biosynthesis | Phenylpropanoids                  | -0.34 | 0.65   | 0.72  |
| lubimin                                                                   | Secondary Metabolite Biosynthesis | Sesquiterpenes                    | -0.11 | -4.88  |       |
| capsidiol                                                                 | Secondary Metabolite Biosynthesis | Sesquiterpenes                    | -0.11 | -23.49 |       |
| heliannuol C                                                              | Secondary Metabolite Biosynthesis | Sesquiterpenes                    | -0.5  | -0.53  | 2.7   |
| hemigossypol                                                              | Secondary Metabolite Biosynthesis | Sesquiterpenes                    | -0.2  | 0.02   | 2.25  |
| 2'-O-methylisoliquiritigenin                                              | Secondary Metabolite Biosynthesis | Compounds                         | -0.02 | 0.77   | 1     |
| abietatriene                                                              | Secondary Metabolite Biosynthesis | Diterpenes                        | -2.45 | -1.29  | -2.05 |
| pseudobaptigenin                                                          | Secondary Metabolite Biosynthesis | Compounds                         | -3.76 | -3.08  | -3.24 |
| (E)-1-(L-cystein-S-yl)-N-hydroxy- $\alpha$ -(methylsulfanyl)hexan-1-imine | Secondary Metabolite Biosynthesis | S-Substituted-L-Cysteines         | 3.87  | 4.67   | 4.62  |
| phytol                                                                    | Secondary Metabolite Biosynthesis | Long-Chain-Primary-Alcohols       | 4.48  | 3.23   | 5.53  |
| 1-(4-hydroxyphenyl)-3-(2,4,6-trihydroxyphenyl)propane-1,3-dione           | Secondary Metabolite Biosynthesis | Open-tautomer-2-hydroxyflavanones | -0.5  | -0.69  | -1.6  |
| shikonin                                                                  | Secondary Metabolite Biosynthesis | Quinones // Secondary-Metabolites | 2     | 1.53   | 1.85  |
| ponciretin                                                                | Secondary Metabolite Biosynthesis | 4-Methoxyflavanones               | -2.57 | -0.17  | -2.6  |
| 16-epivellosimine                                                         | Secondary                         | Compounds                         | -1.2  | -1.58  | 0.1   |

|                                                |                                   |                                      |       |        |        |
|------------------------------------------------|-----------------------------------|--------------------------------------|-------|--------|--------|
|                                                | Metabolite Biosynthesis           |                                      |       |        |        |
| 7-hydroxy-4'5'-dimethoxyisoflavone             | Secondary Metabolite Biosynthesis | Isoflavones                          | 0.07  | -0.63  | -0.13  |
| plaunotol                                      | Secondary Metabolite Biosynthesis | Isoprenoid-Derivatives               | -2.19 | -3.84  | -1.12  |
| 1,5,7-trihydroxy-6,8-dimethoxyanthraquinone    | Secondary Metabolite Biosynthesis | Compounds                            | 0.08  | -0.69  | 0.22   |
| (-)-phaseollin                                 | Secondary Metabolite Biosynthesis | PTEROCARPANS                         | -0.06 | 20.75  | 0.05   |
| hyperxanthone E                                | Secondary Metabolite Biosynthesis | Secondary-Metabolites // Aromatics   | 0.14  | -1.11  | -0.78  |
| (L-cysteinylglycyl)(1H-indol-3-yl)acetonitrile | Secondary Metabolite Biosynthesis | CPD-6262 // Nitriles                 | 3.6   | 2.72   | 2.68   |
| sinapoyl-(S)-malate                            | Secondary Metabolite Biosynthesis | Compounds                            | -1.3  | -9.79  | -0.48  |
| (S)-tetrahydrocolumbamine                      | Secondary Metabolite Biosynthesis | Compounds                            | -0.56 | -20.76 | -20.67 |
| 4-(methylsulfanyl)butyl-desulfoglucosinolate   | Secondary Metabolite Biosynthesis | Desulfoaliphaticglucosinolates       | 0.24  | -0.47  | 0.29   |
| scopolin                                       | Secondary Metabolite Biosynthesis | Compounds                            | 0.29  | -7.3   | -0.6   |
| 2,3-dehydrokievitone                           | Secondary Metabolite Biosynthesis | Compounds                            | 0.06  | 0.05   | 17.46  |
| gluconapin                                     | Secondary Metabolite Biosynthesis | alkenyl-glucosinolate                | -0.09 | -1.19  | -1.11  |
| 3-hydroxypropyl-glucosinolate                  | Secondary Metabolite Biosynthesis | omega-hydroxyalkyl-glucosinolates    | -0.2  | -1.69  | -1.22  |
| sinigrin                                       | Secondary Metabolite Biosynthesis | alkenyl-glucosinolate                | 0.18  | -1.83  | -0.9   |
| 3,7,3',5'-tetramethylmyricetin                 | Secondary Metabolite Biosynthesis | Flavonol-Derivatives                 | -0.45 | -1.79  | -1.54  |
| dopaxanthin quinone                            | Secondary Metabolite Biosynthesis | ALKALOID                             | 0.46  | -0.69  | -0.62  |
| dopaxanthin                                    | Secondary Metabolite Biosynthesis | ALKALOID                             | 0.06  | -1.33  | -1.1   |
| bixin dimethyl ester                           | Secondary Metabolite Biosynthesis | Ketocarotenoids // Carboxylic-esters | 0.59  | -0.82  | -0.64  |

|                                                                     |                                   |                                        |       |        |        |
|---------------------------------------------------------------------|-----------------------------------|----------------------------------------|-------|--------|--------|
| 4-(methylsulfanyl)butyl-glucosinolate                               | Secondary Metabolite Biosynthesis | Omega-methylthio-alkyl-glucosinolates  | 0.07  | -0.85  | -1.16  |
| 2'-hydroxy 3,6,7,3',4'-pentamethylquercetin                         | Secondary Metabolite Biosynthesis | Flavonol-Derivatives                   | 0.1   | -1.18  | -0.76  |
| apigenin 7-O- $\beta$ -D-glucoside                                  | Secondary Metabolite Biosynthesis | Compounds                              | -0.06 | 19.17  | 19.67  |
| 2',3,4,4',6'-pentahydroxychalcone 4'-O- $\beta$ -D-glucoside        | Secondary Metabolite Biosynthesis | Chalcones                              | 0.05  | -0.78  | -0.68  |
| 6-methylsulfinylhexyl-glucosinolate                                 | Secondary Metabolite Biosynthesis | omega-methylsulfinylalkylglucosinolate | -2.09 | -2.37  | -2.1   |
| glucomalcommidin                                                    | Secondary Metabolite Biosynthesis | Aliphatic-glucosinolates               | 18.65 | 17.76  | 19.31  |
| isorhamnetin 3, 4'-bisulfate                                        | Secondary Metabolite Biosynthesis | Compounds                              | -0.06 | 16.34  | 16.48  |
| patulitrin                                                          | Secondary Metabolite Biosynthesis | Flavonol-Derivatives                   | 0.85  | -16.68 | -16.59 |
| steviolmonoside                                                     | Secondary Metabolite Biosynthesis | Diterpenes                             | 20.94 | -0.04  | 0.05   |
| eupatolitin 3-glucoside                                             | Secondary Metabolite Biosynthesis | Flavonol-Derivatives                   | 1.3   | -0.23  | 0.33   |
| 2-benzoyloxy-3-butenylglucosinolate                                 | Secondary Metabolite Biosynthesis | Compounds                              | -17.9 | -17.87 | -17.78 |
| 8-(methylsulfinyl)octyl-glucosinolate                               | Secondary Metabolite Biosynthesis | omega-methylsulfinylalkylglucosinolate | 18.38 | 11.33  | 17.94  |
| hypericin                                                           | Secondary Metabolite Biosynthesis | Dyes                                   | 17.09 | -0.04  | 0.05   |
| malonyldaidzin                                                      | Secondary Metabolite Biosynthesis | Compounds                              | 0.8   | 0.98   | 1.41   |
| emodin dianthrone                                                   | Secondary Metabolite Biosynthesis | Compounds                              | 16.6  | -0.04  | 0.05   |
| 2'-hydroxy 3,6,7,4'-tetramethylquercetin 3'-O- $\beta$ -D-glucoside | Secondary Metabolite Biosynthesis | Flavonol-Derivatives                   | -1.12 | -0.46  | -0.28  |
| pelargonidin 3-O- $\beta$ -D-sambubioside                           | Secondary Metabolite Biosynthesis | Anthocyanins                           | 1.1   | -0.25  | 0.24   |
| gomphrenin I                                                        | Secondary Metabolite Biosynthesis | ALKALOID                               | 17.19 | 19.29  | 0.07   |

|                                                                                |                                   |                                        |        |        |        |
|--------------------------------------------------------------------------------|-----------------------------------|----------------------------------------|--------|--------|--------|
| pelargonidin 3-O-(6"-O-malyl- $\beta$ -D-glucoside)                            | Secondary Metabolite Biosynthesis | Anthocyanins                           | 0.89   | -0.56  | -0.71  |
| 5'-demethoxy-6-methoxypodophyllo toxin 7-glucoside                             | Secondary Metabolite Biosynthesis | LIGNAN                                 | -0.19  | 5.32   | 7.35   |
| cyanidin 3-O-( $\beta$ -D-xylosyl-(1 $\rightarrow$ 2)- $\beta$ -D-galactoside) | Secondary Metabolite Biosynthesis | Anthocyanins                           | -0.02  | 17.07  | 17.34  |
| maysin                                                                         | Secondary Metabolite Biosynthesis | Flavones                               | -0.87  | -0.55  | -1.26  |
| kaempferol-3-O- $\beta$ -D-glucopyranoside-7-O- $\beta$ -L-rhamnopyranoside    | Secondary Metabolite Biosynthesis | Flavonol-3-O-Glucoside-7-O-Rhamnosides | -0.61  | -0.62  | -2.4   |
| 2-sinapoyloxy-3-butenylglucosinolate                                           | Secondary Metabolite Biosynthesis | Compounds                              | -0.38  | -0.43  | -16.88 |
| isovitexin 2"-O-rhamnoside                                                     | Secondary Metabolite Biosynthesis | Flavones                               | -0.14  | -18.31 | 0.63   |
| pelargonidin-3-O-rutinoside                                                    | Secondary Metabolite Biosynthesis | Anthocyanidin-3-O-beta-D-glucosides    | -1.73  | -1.66  | -19.03 |
| narirutin                                                                      | Secondary Metabolite Biosynthesis | Compounds                              | -17.89 | -17.77 | -17.68 |
| naringin                                                                       | Secondary Metabolite Biosynthesis | Flavonone-rhamnosyl-glucosides         | 0.23   | -4.73  | -11.05 |
| baccatin III                                                                   | Secondary Metabolite Biosynthesis | Compounds                              | 0.23   | 0.23   | 0.72   |
| 1,2-di-O-sinapoyl- $\beta$ -D-glucose                                          | Secondary Metabolite Biosynthesis | Compounds                              | -0.46  | -18.26 | -18.18 |
| tricafeoyl spermidine                                                          | Secondary Metabolite Biosynthesis | Amides                                 | -1.86  | -1.8   | -1.24  |
| 3',5'-di-C-glucosylphloretin                                                   | Secondary Metabolite Biosynthesis | Compounds                              | 0.73   | 0.33   | 1.16   |
| quercetin 3, 3', 4', 7-tetrasulfate                                            | Secondary Metabolite Biosynthesis | Flavonol-Derivatives                   | 18.51  | 18.37  | 18.67  |
| dalnigrein 7-O- $\beta$ -D-apiofuranosyl-(1-6)- $\beta$ -D-glucopyranoside     | Secondary Metabolite Biosynthesis | Isoflavones                            | 17.37  |        | 17.78  |
| isorhamnetin 3-O-(6"-O-feruloyl)-glucoside                                     | Secondary Metabolite Biosynthesis | Flavonol-Derivatives                   | -0.6   | -0.77  | -0.4   |
| myricetin 3-O-gentiobioside                                                    | Secondary Metabolite Biosynthesis | Flavonol-3-O-D-Glucosides              | -0.06  | 16.51  | 0.05   |

|                                                            |                                   |                                           |        |        |        |
|------------------------------------------------------------|-----------------------------------|-------------------------------------------|--------|--------|--------|
| (+)-sesaminol 2-O- $\beta$ -D-gentiobioside                | Secondary Metabolite Biosynthesis | LIGNAN                                    | -0.82  | -17.64 | -17.55 |
| dihydroxyferuloyl-sinapoyl spermidine                      | Secondary Metabolite Biosynthesis | Compounds                                 | 20.5   | 17.29  | 17.43  |
| N-debenzoyl-(3'-RS)-taxol                                  | Secondary Metabolite Biosynthesis | ALKALOID                                  | 17.12  | 18.53  | 18.36  |
| N-debenzoyl-(3'-RS)-2'-deoxytaxol                          | Secondary Metabolite Biosynthesis | ALKALOID                                  | 3.73   | 6.07   | 5.25   |
| kaempferol 3-O-(3"-O-p-coumaroyl, 6"-O-feruloyl)-glucoside | Secondary Metabolite Biosynthesis | Flavonol-Derivatives                      | -0.06  | 16.82  | 0.05   |
| stevioside                                                 | Secondary Metabolite Biosynthesis | Diterpenes                                | 19.85  | 17.46  | 18.04  |
| oleanolate 3-beta-D-glucuronoside-(3,1)-galactoside        | Secondary Metabolite Biosynthesis | Triterpenes                               | 16.46  | 19.09  | 19.62  |
| monodeglucosyl des-acyl avenacin A                         | Secondary Metabolite Biosynthesis | Triterpenes                               | 0.85   | 1.89   |        |
| $\beta$ -D-gentiobiosyl $\beta$ -D-glucosyl crocetin       | Secondary Metabolite Biosynthesis | Beta-D-glucosides // Glycosyl-Esters      | 16.8   | 18.01  | 18.49  |
| vincristine                                                | Secondary Metabolite Biosynthesis | Organic-heteroptetracyclic-compounds      | 20.74  | 21.31  | 21.07  |
| taxol                                                      | Secondary Metabolite Biosynthesis | Terpenoids                                | 19.55  | 19.57  | 20.43  |
| curcumin 4'-O- $\beta$ -D-gentiotrioside                   | Secondary Metabolite Biosynthesis | POLYKETIDE // Phenols // Phenylpropanoids | -18.15 | -18.17 | -18.08 |
| ternatin C5                                                | Secondary Metabolite Biosynthesis | Anthocyanins                              | -16.75 | -16.73 | -16.64 |
| (S)-3-hydroxy-3-methylglutaryl-CoA (HMG-CoA)               | Secondary Metabolite Biosynthesis | All-Coas                                  | -0.06  |        | 17.11  |
| soyasaponin I                                              | Secondary Metabolite Biosynthesis | Soyasaponins // Pentacyclic-triterpenoids | -5.87  | -0.54  | -5.67  |
| (E,E)-piperoyl-CoA                                         | Secondary Metabolite Biosynthesis | Compounds                                 | -0.06  | 16.36  | 16.71  |
| rebaudioside A                                             | Secondary Metabolite Biosynthesis | Diterpenes                                | 16.72  | 16.6   | 17.61  |
| indolin-2-one                                              | Secondary Metabolite Biosynthesis | Indole-Derivatives                        | 2.65   | 1.82   | 1.17   |
| dimethylsulfonio-2-hydroxybutanoate                        | Secondary Metabolite              | Monocarboxylates // ORGANOSULFUR          | -7.94  | -0.45  | -1.36  |

|                                                                                 |                                   |                                                  |        |        |        |
|---------------------------------------------------------------------------------|-----------------------------------|--------------------------------------------------|--------|--------|--------|
|                                                                                 | Biosynthesis                      |                                                  |        |        |        |
| dioxindole-3-acetyl-3-O-beta-glucose                                            | Secondary Metabolite Biosynthesis | Dioxindole-3-Acetyl-3-O-hexoses                  | 0.45   | 0.43   | -20.05 |
| 7-hydroxy-2-oxindole-3-acetate glucoside                                        | Secondary Metabolite Biosynthesis | Compounds                                        | 0.45   | 0.43   | -20.09 |
| <i>N</i>-[&beta;-glucosyl-(1,4)-&beta;-glucosyl]-(oxindol-3-yl)acetyl-aspartate | Secondary Metabolite Biosynthesis | Indole-Derivatives // Modified-Amino-Acids       | -19.45 | -19.45 | -19.45 |
| benzylisothiocyanate                                                            | Secondary Metabolite Degradation  | ISOTHIOCYANATES                                  | -18.28 | -0.89  | -0.56  |
| indole-3-carbinol                                                               | Secondary Metabolite Degradation  | Indole-Phytoalexins                              | -0.98  | -2.13  | -2.13  |
| 2-benzylthiohydroximate-O-sulfate                                               | Secondary Metabolite Degradation  | THIOHYDROXIMATE-O-SULFATES                       | -0.06  | 16.75  | 17.34  |
| 7'-hydroxyabscisate                                                             | Secondary Metabolite Degradation  | Absciscic-Acid-Derivative                        | -0.06  | 23.39  | 21.53  |
| primeverose                                                                     | Secondary Metabolite Degradation  | Disaccharides                                    | -7.74  | 15.74  | -7.64  |
| linalyl 6-O-α-L-arabinopyranosyl-α-D-glucopyranoside                            | Secondary Metabolite Degradation  | Monoterpenols // Carbohydrate-Derivatives        | 19.58  | 19.13  | 19.44  |
| (glutathion-S-yl)-4-methoxy-3-indolylmethylisothiocyanate                       | Secondary Metabolite Degradation  | Indole-Phytoalexins // S-Substituted-Glutathione | 2.16   | -0.84  | 1.37   |
| D-myo-inositol (1,2,3,5,6) pentakisphosphate                                    | Secondary Metabolite Degradation  | D-myo-inositol-pentakisphosphates                | -0.06  |        | 17.06  |
