# Supplementary material for: Metabolomics and Physiological Insights into the Ability of Exogenously Applied Chlorogenic Acid and Hesperidin to Modulate Salt Stress in Lettuce Distinctively
Source: MDPI journal article supplement (doi:10.3390/molecules26206291), 2021-10-18
Supplement: s1 [file s1]

**Table S3.** List of statistically significant metabolites that have passed the one-way analysis of variance (ANOVA) and with Log fold-change (LogFC) values greater than or equal to 1.3, obtained from lettuce samples grown under salinity condition. For each compound the category of the compound, the ontology of the compound, LogFC obtained by pairwise comparison between salinity vs control, chlorogenic acid vs control, hesperidin vs control, and hesperidin + chlorogenic acid vs control were reported.

| Compound Name                                                                    | Category                        | Ontology - parents of class                                                  | Log FC [Salt] vs [Control] | Log FC [Salt - Chlorogenic acid] vs [Control] | Log FC [Salt - Hesperidin] vs [Control] | Log FC [Salt - Hesperidin + Chlorogenic Acid] vs [Control] |
|----------------------------------------------------------------------------------|---------------------------------|------------------------------------------------------------------------------|----------------------------|-----------------------------------------------|-----------------------------------------|------------------------------------------------------------|
| betaine aldehyde                                                                 | Amine and Polyamine Degradation | Quaternary-Amines                                                            | 0.35                       | 0.09                                          | -0.2                                    | 0.52                                                       |
| betaine aldehyde hydrate                                                         | Amine and Polyamine Degradation | Quaternary-Amines                                                            | -0.14                      | -0.09                                         | -0.27                                   | 0.76                                                       |
| 4-aminobutanal                                                                   | Amine and Polyamine Degradation | Aliphatic-Omega-Amino-Aldehydes                                              | 19.38                      |                                               |                                         | 20.42                                                      |
| 1,5-diazabicyclononane                                                           | Amine and Polyamine Degradation | Compounds                                                                    | 18.65                      | 18.52                                         | 0.03                                    | -0.18                                                      |
| 1-(3-aminopropyl)-4-aminobutanal                                                 | Amine and Polyamine Degradation | Aliphatic-Diamines                                                           | 0.47                       | -0.77                                         | -1.87                                   | -0.96                                                      |
| 1-(3-aminopropyl)-pyrrolinium                                                    | Amine and Polyamine Degradation | Compounds                                                                    | 0.57                       | -0.67                                         | -1.78                                   | -0.87                                                      |
| (S)-ureidoglycolate                                                              | Amine and Polyamine Degradation | Ureido-Compounds                                                             | 0.78                       | -0.36                                         | -0.32                                   | -0.36                                                      |
| 2-iminopropanoate                                                                | Amino Acid Biosynthesis         | Imines // Enamines                                                           | 6.92                       | -13.16                                        | 6.25                                    | 8.23                                                       |
| 2-aminoprop-2-enoate                                                             | Amino Acid Biosynthesis         | Enamines                                                                     | 0.26                       | -0.09                                         | 0.03                                    | 21.35                                                      |
| 4-methyl-2-oxopentanoate                                                         | Amino Acid Biosynthesis         | 2-Oxo-carboxylates // Methyl-Branched-Fatty-Acids // Short-chain-fatty-acids | 0.26                       | 21.34                                         | 0.03                                    | 20.58                                                      |
| (2R)-2,3-dihydroxy-3-methylbutanoate                                             | Amino Acid Biosynthesis         | DIOH-ISOVALERATE                                                             | -10.79                     | -3.3                                          | -7.34                                   | -2.51                                                      |
| adenine                                                                          | Amino Acid Biosynthesis         | Purines // Purine-Bases                                                      | 0.25                       | -0.91                                         | -0.07                                   | -1.29                                                      |
| D-erythro-imidazole-glycerol-phosphate                                           | Amino Acid Biosynthesis         | Compounds                                                                    | -0.66                      | -0.78                                         | -0.35                                   | -2.86                                                      |
| 2-hydroxy-5-(methylsulfanyl)-3-oxopent-1-enyl 1-phosphate                        | Amino Acid Biosynthesis         | Compounds                                                                    | 0.06                       | 19.63                                         | -0.17                                   | 18.55                                                      |
| 1-(5-phospho-β-D-ribose)-5-[(5-phosphoribosylamino)methylideneamino]imidazole-4- | Amino Acid Biosynthesis         | Carboxamides                                                                 | 8.46                       | -0.09                                         | 16.66                                   | -0.18                                                      |

|                                              |                                             |                                                                                      |        |        |       |        |
|----------------------------------------------|---------------------------------------------|--------------------------------------------------------------------------------------|--------|--------|-------|--------|
| carboxamide                                  |                                             |                                                                                      |        |        |       |        |
| (S)-3-hydroxy-isobutanoate                   | Amino Acid Degradation                      | 3-HYDROXY-ISOBUTYRATE                                                                | 0.26   | -0.09  | 0.03  | 17.78  |
| D-sedoheptulose 1,7-bisphosphate             | Carbohydrate Biosynthesis                   | Sugar-Phosphate                                                                      | 0.26   | 16.28  | 0.03  | 17.33  |
| CE-L-fucose 1-phosphate                      | Carbohydrate Biosynthesis                   | Compounds                                                                            | 0.26   | -0.09  | 0.03  | 17.97  |
| 6-kestotriose                                | Carbohydrate Biosynthesis                   | Levan                                                                                | 0.26   | 17.76  | 0.03  | 19.1   |
| UDP-CE-L-arabinopyranose                     | Carbohydrate Biosynthesis                   | UDP-L-arabinopyranose                                                                | -0.54  | -0.43  | -0.31 | -0.94  |
| dTDP-4-dehydro-6-deoxy-CE-D-glucopyranose    | Carbohydrate Biosynthesis                   | NDP-4-dehydro-6-deoxy-D-glucose // DTDP-SUGARS // DTDP-4-DEHYDRO-6-DEOXY-D-GALACTOSE | -17.25 | -17.6  | -0.33 | -17.69 |
| (2E,14E,18E)-lycopatriene                    | Carbohydrate Biosynthesis                   | Hydrocarbons // Tetraterpenes                                                        | -1.57  | -18.21 | -0.43 | -18.31 |
| CE-D-galactopyranose                         | Carbohydrates and Carboxylates Degradation  | D-galactopyranose                                                                    | 0.16   | -0.09  | -0.01 | 21.55  |
| formyl-CoA                                   | Carbohydrates and Carboxylates Degradation  | All-Coas                                                                             | -18.27 | -0.45  | -0.42 | -18.65 |
| dodecane-1,7-diol                            | Cell Structure Biosynthesis                 | Diols                                                                                | 19.08  |        | 18.32 | -0.19  |
| 1,18-octadecane-diol                         | Cell Structure Biosynthesis                 | Long-chain-alcohols // Diols                                                         | 2.09   | 0.99   | -1.21 | 1.17   |
| 18-hydroxyoleate                             | Cell Structure Biosynthesis                 | Omega-Hydroxy-long-Chain-Fatty-Acid                                                  | 0.15   | -1.04  | -0.38 | -1.92  |
| CE,α-9Z-octadecenedioate                     | Cell Structure Biosynthesis                 | Alpha-omega-dicarboxylates                                                           | 0.12   | -1.76  | -0.21 | -3.21  |
| 2-(2,8-dihydroxytridecyl)-6-oxopyran-4-olate | Cell Structure Biosynthesis                 | POLY-HYDROXYLATED-TETRAKETIDE-PYRONE                                                 | 1.11   | -2.36  | -7.14 | -2.51  |
| 7-hydroxylauroyl-CoA                         | Cell Structure Biosynthesis                 | Medium-Chain-234-Saturated-acyl-CoAs // HYDROXY-ACYL-COA                             | 0.35   | -0.56  | -0.16 | -17.7  |
| trichloroethanol                             | Chlorinated Compound Degradation            | Compounds                                                                            | -0.73  | -17.83 | -1.35 | -17.93 |
| trichloroethanol glucoside                   | Chlorinated Compound Degradation            | Compounds                                                                            | -0.71  | -1.72  | -0.12 | -2.21  |
| 5-oxo-L-proline                              | Cofactor, Carrier, and Vitamin Biosynthesis | Compounds                                                                            | 0.26   | 17.42  | 0.03  | 17.27  |
| 4-aminobenzoate                              | Cofactor, Carrier, and Vitamin Biosynthesis | Benzoates                                                                            | 2.88   | 1.02   | 1.33  | 2.22   |
| (R)-pantoate                                 | Cofactor, Carrier,                          | Monocarboxylates                                                                     | -13.89 | -6.46  | -0.8  | 7.91   |

|                                                           |                                                          |                                                                 |        |        |        |        |
|-----------------------------------------------------------|----------------------------------------------------------|-----------------------------------------------------------------|--------|--------|--------|--------|
|                                                           | and Vitamin Biosynthesis                                 |                                                                 |        |        |        |        |
| 7,8-diaminopelargonate                                    | Cofactor, Carrier, and Vitamin Biosynthesis              | Compounds                                                       | 1.19   | -17.51 | -17.43 | -17.86 |
| 1-deoxy-L-glycero-tetrolase 4-phosphate                   | Cofactor, Carrier, and Vitamin Biosynthesis              | Compounds                                                       | 0.26   | 17.96  | 0.03   | 17.87  |
| 4-amino-2-methyl-5-(diphosphoxymethyl)pyrimidine (HMP-PP) | Cofactor, Carrier, and Vitamin Biosynthesis              | Compounds                                                       | 0.26   | -0.09  | 0.03   | 17.57  |
| phyloquinol                                               | Cofactor, Carrier, and Vitamin Biosynthesis              | CPD-11501 // ETR-Quinols                                        | -0.07  | -1.7   | 0.04   | -2.04  |
| 2-methoxy-6-(all-trans-nonaprenyl)phenol                  | Cofactor, Carrier, and Vitamin Biosynthesis              | 2-Methoxy-6-polyprenyl-phenols                                  | 0.99   | -0.61  | -0.48  | 1.34   |
| all trans-decaprenyl-2-methoxy-6-1,4-benzoquinol          | Cofactor, Carrier, and Vitamin Biosynthesis              | 2-Methoxy-6-Polyprenyl-14-Benzoquinols                          | 1.35   | 1.15   | 1.89   | 0.47   |
| 3-methoxy-4-hydroxy-5-all-trans-decaprenylbenzoate        | Cofactor, Carrier, and Vitamin Biosynthesis              | 3-Methoxy-4-Hydroxy-5-Polyprenylbenzoate                        | 18.4   | 17.35  | 0.03   | 18.79  |
| preuroporphyrinogen                                       | Cofactor, Carrier, and Vitamin Biosynthesis              | Compounds                                                       | -0.11  | -0.01  | 0.35   | -0.81  |
| octanoyl-CoA                                              | Cofactor, Carrier, and Vitamin Biosynthesis              | Medium-Chain-234-Saturated-acyl-CoAs                            | -18.23 | -18.23 | -0.07  | -18.64 |
| epoxyphosphoribide                                        | Cofactor, Prosthetic Group, Electron Carrier Degradation | Chlorins                                                        | -0.06  | -1.02  | 0.08   | -2.8   |
| verdochrome                                               | Cofactor, Prosthetic Group, Electron Carrier Degradation | Hemes                                                           | 17.77  | -0.09  | 0.03   | -0.18  |
| Urohydroxyheme                                            | Cofactor, Prosthetic Group, Electron Carrier Degradation | Hemes                                                           | -5.8   | -0.22  | 0.1    | -17.16 |
| 3R-hydroxy-lesqueroloyl-CoA                               | Fatty Acid and Lipid Biosynthesis                        | All-Coas                                                        | 0.26   | -0.09  | 16.56  | -0.18  |
| (3R,5Z,8Z,11Z,14Z,17Z)-3-hydroxydocosapentaenoyl-CoA      | Fatty Acid and Lipid Biosynthesis                        | Compounds                                                       | -0.35  | -0.36  | -0.01  | -1.17  |
| O-phosphoethanolamine                                     | Fatty Acid and Lipid Biosynthesis                        | Compounds                                                       | 0.48   | 2.8    | -17.15 | 3.73   |
| laurate                                                   | Fatty Acid and Lipid Biosynthesis                        | Medium-Chain-234-Saturated-Fatty-Acids // Saturated-Fatty-Acids | 0.69   | -19.42 | -0.62  | -19.34 |
| sphinganine (C18)                                         | Fatty Acid and Lipid Biosynthesis                        | D-erythro-Shinganes                                             | 0.5    | -0.69  | 0.03   | -0.68  |
| (9Z)-12,13-dihydroxyoctadecanoate                         | Fatty Acid and Lipid Biosynthesis                        | Long-Chain-234-Saturated-Fatty-Acids //                         | -0.25  | -1.79  | -0.36  | -2.79  |

|                                                              |                                   |                                                  |        |        |       |        |
|--------------------------------------------------------------|-----------------------------------|--------------------------------------------------|--------|--------|-------|--------|
|                                                              |                                   | Monounsaturated-fatty-acids                      |        |        |       |        |
| allopregnanolone                                             | Fatty Acid and Lipid Biosynthesis | 3-Beta-Hydroxysterols // C21-Steroids            | 0.3    | 5.72   | 9.13  | 5.5    |
| digitoxigenin                                                | Fatty Acid and Lipid Biosynthesis | 3-Beta-Hydroxysterols // Cardenolides            | 0.07   | -0.89  | -0.17 | -1.8   |
| 7-dehydrosdesmosterol                                        | Fatty Acid and Lipid Biosynthesis | Delta5-Delta7-Steroids // 3-Beta-Hydroxysterols  | -0.56  | -2.4   | -0.39 | -4.21  |
| squalene                                                     | Fatty Acid and Lipid Biosynthesis | Triterpenes                                      | -1.74  | -0.03  | -1.4  | -0.23  |
| CDP-N-methylethanolamine                                     | Fatty Acid and Lipid Biosynthesis | Compounds                                        | 17.53  | 16.89  | 17    | 11.97  |
| CDP-ethanolamine                                             | Fatty Acid and Lipid Biosynthesis | Modified-Nucleotides // Pyrimidines              | -0.25  | 0.66   | -0.34 | 0.5    |
| 4-(cytidine 5'-diphospho)-2-C-methyl-D-erythritol            | Fatty Acid and Lipid Biosynthesis | CDP-SUGARS                                       | -17.29 | -17.29 | -0.06 | -5.85  |
| 1-16:0-2-18:2-diacylglycerol-trimethylhomoserine             | Fatty Acid and Lipid Biosynthesis | CPD4LZ-25                                        | 3.7    | -18.32 | -1.01 | -2.94  |
| 1-18:2-2-16:3-monogalactosyldiacylglycerol                   | Fatty Acid and Lipid Biosynthesis | Monogalactosyldiacylglycerols-34-5               | -0.34  | -0.71  | 0.29  | -0.76  |
| UDP-3-O-(3-hydroxymyristoyl)-Cε-D-glucosamine                | Fatty Acid and Lipid Biosynthesis | UDP-sugar                                        | 0.12   | -1.22  | 0.14  | -18.44 |
| 1-linoleoyl-2-linoleoyl-phosphatidylcholine                  | Fatty Acid and Lipid Biosynthesis | Phosphatidylcholines-36-4                        | 3.82   | -1.45  | 3.33  | 5.34   |
| 1-18:1-2-16:0-digalactosyldiacylglycerol                     | Fatty Acid and Lipid Biosynthesis | Digalactosyldiacylglycerols-34-1                 | -0.46  | -0.57  | -0.99 | -1.6   |
| lauroyl-CoA                                                  | Fatty Acid and Lipid Biosynthesis | Medium-Chain-234-Saturated-acyl-CoAs             | -16.34 | -0.18  | 0.32  | -16.78 |
| 1-18:2-2-16:0-digalactosyldiacylglycerol                     | Fatty Acid and Lipid Biosynthesis | Digalactosyldiacylglycerols-34-2                 | -0.91  | -0.84  | -0.83 | -1.42  |
| trans-tuberonic acid glucoside                               | Hormone Biosynthesis              | Jasmonate or derivatives                         | 0.15   | 2.42   | 0.56  | -1.59  |
| 3-oxo-2-(cis-2'-pentenyl)-cyclopentane-1-(E-but-2-enoyl)-CoA | Hormone Biosynthesis              | All-Coas                                         | 0.08   | -0.64  | -0.39 | -18.37 |
| N-acetyl-serotonin                                           | Hormone Biosynthesis              | Indole-Derivatives // N-Acetyl-2-Arylethylamines | 0.26   | -0.09  | 0.03  | 19.8   |
| 6-deoxocathasterone                                          | Hormone Biosynthesis              | Brassinosteroids                                 | 6.05   | -7.48  | 6.83  | -1.49  |
| (22R,23R)-22,23-dihydroxy-campester-4-en-3-one               | Hormone Biosynthesis              | Brassinosteroids                                 | 1.12   | -0.06  | -0.35 | 0.06   |

|                                                                      |                                        |                                                      |        |        |        |        |
|----------------------------------------------------------------------|----------------------------------------|------------------------------------------------------|--------|--------|--------|--------|
| (22R,23R)-22,23-dihydroxycampesterol                                 | Hormone Biosynthesis                   | Brassinosteroids                                     | -1.62  | -0.78  | -0.35  | -0.93  |
| 3-dehydro-6-hydroxytestosterone                                      | Hormone Biosynthesis                   | Brassinosteroids                                     | 1.15   | -0.02  | -0.34  | 0.08   |
| N6-(Cei2-isopentenyl)-adenosine 5'-diphosphate                       | Hormone Biosynthesis                   | Compounds                                            | 17.57  | 17.92  | 0.03   | 16.84  |
| 3-oxo-2-(cis-2'-pentenyl)-cyclopentane-1-(3R-hydroxybutanoyl)-CoA    | Hormone Biosynthesis                   | All-Coas                                             | -0.63  | -0.63  | -0.18  | -18.47 |
| isopentenyl adenosine                                                | Hormone Degradation                    | Nucleosides-Analogues                                | 0.89   | 0.5    | 0.49   | -0.12  |
| 16E±,17-epoxy gibberellin A4                                         | Hormone Degradation                    | Gibberellins                                         | 1.15   | -0.08  | 0.26   | -0.09  |
| 26-hydroxybrassinolide                                               | Hormone Degradation                    | Brassinosteroids                                     | 0.16   | 1.14   | 0.4    | 1.16   |
| guanine                                                              | Nucleoside and Nucleotide Biosynthesis | Purines // Purine-Bases                              | 0.06   | -1.08  | -0.27  | -1.57  |
| orotate                                                              | Nucleoside and Nucleotide Biosynthesis | Monocarboxylates // Pyrimidines                      | 19.16  |        |        | 18.63  |
| N1-(5-phospho-Cε-D-ribosyl)glycinamide (GAR)                         | Nucleoside and Nucleotide Biosynthesis | Compounds                                            | -0.62  | -0.55  | 1.53   | -0.12  |
| 2-(formamido)-N1-(5-phospho-Cε-D-ribosyl)acetamidine (FGAM)          | Nucleoside and Nucleotide Biosynthesis | Compounds                                            | 2.16   | 3.18   | 0.22   | 3.18   |
| adenosine 5'-phosphoramidate                                         | Nucleoside and Nucleotide Biosynthesis | CPD0-2580                                            | 1.84   | 2.32   | 0.61   | 1.98   |
| GDP                                                                  | Nucleoside and Nucleotide Biosynthesis | Purine-ribonucleosides-5-PP // All-Nucleosides       | 17.52  | 16.42  | 0.04   | 17.04  |
| 5'-phosphoribosyl-4-(N-succinocarboxamide)-5-aminoimidazole (SAICAR) | Nucleoside and Nucleotide Biosynthesis | Compounds                                            | -0.19  | -18.45 | -18.36 | -18.55 |
| dTTP                                                                 | Nucleoside and Nucleotide Biosynthesis | Pyrimidine-deoxyribonucleosides-5-PPP // Pyrimidines | 1.05   | -0.07  | -5.73  | 0.67   |
| CTP                                                                  | Nucleoside and Nucleotide Biosynthesis | Pyrimidine-ribonucleosides-5-PPP // Pyrimidines      | 17.72  | 0.04   | 0.02   | 17.4   |
| cyclic ADP-ribose                                                    | Nucleoside and Nucleotide Biosynthesis | ADP-RIBOSE-P-OR-NOP                                  | -16.81 | -0.42  | -0.24  | -0.79  |

|                                                                               |                    |                                                                |        |        |        |        |
|-------------------------------------------------------------------------------|--------------------|----------------------------------------------------------------|--------|--------|--------|--------|
| (S)-1-pyrroline-5-carboxylate                                                 | Other Biosynthesis | CPD-478                                                        | 19.2   | 19.33  | 19.52  | 20.79  |
| (S)-1-pyrroline-5-carboxylate                                                 | Other Biosynthesis | Unclassified-Compounds                                         |        |        |        | 17.71  |
| 2-naphthol                                                                    | Other Biosynthesis | Compounds                                                      | 0.26   | 22.36  | 0.03   | 21.49  |
| 1-naphthol                                                                    | Other Biosynthesis | Compounds                                                      | 1.24   | 0.71   | -0.27  | -0.16  |
| dehydrospermidine                                                             | Other Biosynthesis | Aliphatic-Alpha-Omega-Diamines                                 | 0.38   | -0.74  | -20.29 | -0.94  |
| 2-[(2'-methylsulfanyl)ethyl]maleate                                           | Other Biosynthesis | CPD-19484                                                      | -0.29  | -1.38  | -1.08  | -0.81  |
| 3-[(2'-methylsulfanyl)ethyl]malate                                            | Other Biosynthesis | CPD-19483                                                      | 0.26   | 18.54  | 0.03   | 18.13  |
| 2-[(2'-methylsulfanyl)ethyl]malate                                            | Other Biosynthesis | CPD-19482                                                      | 8.82   | 18.32  |        | 17.91  |
| chlorophyllide a                                                              | Other Biosynthesis | Chlorophyllides // Organometallics                             | 0.57   | 1.31   | 1.12   | 1.41   |
| 8'-(3,4-dihydroxy-5-alkenyl)phenyl-3-[9'E,11'E,13'Z-pentadecatrienyl]catechol | Other Biosynthesis | Catechols                                                      | -0.07  | -0.7   | -1.43  | 0.92   |
| 71-dihydroxychlorophyllide a                                                  | Other Biosynthesis | Chlorophyllides // Organometallics                             | -19.12 | -1.22  | 0.57   | -5.55  |
| dihydrogeranylgeranyl chlorophyll a                                           | Other Biosynthesis | Organometallics                                                | 0.11   | 1.42   | -0.28  | 1.56   |
| tetrahydrogeranylgeranyl chlorophyll a                                        | Other Biosynthesis | Organometallics                                                | 1.28   | -0.62  | 0.98   | -13.16 |
| chlorophyll a                                                                 | Other Biosynthesis | CPD-18899                                                      | 1.05   | 2      | 0.17   | 1.09   |
| chlorophyll b                                                                 | Other Biosynthesis | Chlorophylls // Organometallics                                | 5.44   | 4.87   | 2.08   | -3.91  |
| 3-cyano-L-alanine                                                             | Other Degradation  | Nitriles                                                       | -0.65  | -1.19  | 0.06   | -0.09  |
| (E)-2-pentenal                                                                | Other Pathways     | Unsaturated-aldehydes                                          | 1.67   | 1.67   | 2.05   | 1.26   |
| thiosulfate                                                                   | Other Pathways     | Inorganic-Anions                                               | 9.15   | -9.35  | -0.41  | 9.87   |
| cyclohexylamine                                                               | Other Pathways     | Compounds                                                      | 0.51   | 0.11   | -0.46  | -0.18  |
| 2-pyrrolidone                                                                 | Other Pathways     | Compounds                                                      | -19.74 | -0.62  | -0.11  | 0.19   |
| butanoate                                                                     | Other Pathways     | Saturated-Fatty-Acids // Short-Chain-234-Saturated-Fatty-Acids | 19.58  |        |        |        |
| N-isopropylformamide                                                          | Other Pathways     | Compounds                                                      | 0.26   | 20.37  | 0.03   | 19.55  |
| 2-furoate                                                                     | Other Pathways     | Compounds                                                      | -0.16  | -0.26  | -0.15  | -19.93 |
| dioxane                                                                       | Other Pathways     | Compounds                                                      | 0.1    | -18.35 | -0.18  | -18.35 |
| enol-oxaloacetate                                                             | Other Pathways     | C4-dicarboxylates                                              | 0.72   | -0.57  | 0.39   | -0.57  |
| (R,R)-2,3-butanediol                                                          | Other Pathways     | 2-3-Butanediols                                                | 0.21   | -0.1   | 0.02   | 19.12  |
| 2-(2-methylpyridin-3-yl)ethanol                                               | Other Pathways     | Pyridines                                                      | 0.75   | -1.81  | -0.43  | -2.97  |

|                                 |                |                                                                           |        |        |        |        |
|---------------------------------|----------------|---------------------------------------------------------------------------|--------|--------|--------|--------|
| L-2,4-diaminobutanoate          | Other Pathways | L-Amino-Acids                                                             | 0.99   | -1.53  | -1.07  | -2.66  |
| threose                         | Other Pathways | Aldotetraoses                                                             | -0.02  | -2.95  | 0.12   | -3.41  |
| D-allothreonine                 | Other Pathways | ALLO-THR                                                                  | 22.22  | -0.07  | 0.06   | 21.51  |
| pyruvic oxime                   | Other Pathways | Compounds                                                                 | 0.19   | 18.35  |        | 5.45   |
| arsenite                        | Other Pathways | Compounds                                                                 | 13.82  | 3.06   | -6.31  | 1.9    |
| methylmethanethiosulfonate      | Other Pathways | Compounds                                                                 | -17.07 | -12.12 | -10.7  | -5.44  |
| heptanoate                      | Other Pathways | Medium-Chain-234-Saturated-Fatty-Acids // Saturated-Fatty-Acids           | -0.08  | 3.96   | -0.05  | 4.33   |
| triethanolamine                 | Other Pathways | Non-Metabolic-Compounds                                                   | 0.41   | -1.92  | -0.79  | -3.37  |
| pteridine-ring                  | Other Pathways | Rings                                                                     | 0.14   | 1.91   | -0.05  | 2.87   |
| chromate                        | Other Pathways | Inorganic-Anions                                                          | -0.04  | -0.58  | -0.94  | 0.14   |
| 3-phenylpropanoate              | Other Pathways | Aromatic-Acid // Monocarboxylates // Phenylalkanoates // Phenylpropanoids | 3.76   | 1.26   | 2.62   | -0.24  |
| (1R)-trans-chrysanthemate       | Other Pathways | Compounds                                                                 | 0.26   | -0.09  | 0.03   | 19.29  |
| aldehydo-L-arabinose            | Other Pathways | L-ARABINOSE                                                               | 0.22   | 1.96   | -0.36  | 2.92   |
| x-pyrophosphate-group           | Other Pathways | Simple-Groups                                                             | 0.08   | -0.25  | -0.1   | -0.59  |
| 2-deoxy-D-galactose             | Other Pathways | Modified-Sugars                                                           | 0.26   | 21.3   | 0.03   | 21.08  |
| thioguanine                     | Other Pathways | Thiopurines                                                               | 0.26   | 17.22  | 0.03   | -0.18  |
| isophthalate                    | Other Pathways | dicarboxylate                                                             | 0.26   | 19.21  | 0.03   | 19.86  |
| 2-hydroxy-5-oxoproline          | Other Pathways | Modified-Amino-Acids                                                      | -0.1   | 2.85   | -0.12  | 6.28   |
| iodate                          | Other Pathways | Compounds                                                                 | -0.4   | -18.84 | -18.84 | -18.84 |
| cumene hydroperoxide            | Other Pathways | Alkyl-Hydro-Peroxides                                                     | -0.12  | -0.46  | -0.74  | -0.59  |
| decan-2-ol                      | Other Pathways | Secondary-Alcohols // Medium-Chain-Alcohols                               | 0.26   | 0.01   | 16.39  | 0.01   |
| fosmidomycin                    | Other Pathways | Antibiotics // Organophosphonates                                         | 7.09   | 6.14   | 4.36   | 8.23   |
| difluoromethylornithine         | Other Pathways | Compounds                                                                 | 0.63   | -3.49  | -0.48  | -3.49  |
| Hg2+                            | Other Pathways | Post-Transition-Metal-Cations // Divalent-Inorganic-Cations               | 0.01   | -1.27  | 0.23   | -0.41  |
| D,L- (E)-hydroxyphosphinotricin | Other Pathways | Compounds                                                                 | -1.09  | -1.18  | -0.15  | -2.06  |
| N-prenylagmatine                | Other Pathways | Compounds                                                                 | -18.53 | -18.53 | -18.53 | -18.53 |
| tetradecan-1-ol                 | Other Pathways | Long-Chain-Primary-Alcohols // Long-chain-alcohols                        | 0.47   | -0.93  | -0.45  | -1.24  |

|                                                            |                |                                                               |        |        |        |        |
|------------------------------------------------------------|----------------|---------------------------------------------------------------|--------|--------|--------|--------|
| (-)-cuparene                                               | Other Pathways | Sesquiterpenes                                                | -10.3  | -19.25 | -19.17 | -19.17 |
| (R)-lipoate                                                | Other Pathways | Cofactors                                                     | 0.32   | 13.52  | -0.55  | -6.58  |
| (3R)-3-hydroxy-2-oxo-4-phosphooxybutanoate                 | Other Pathways | 2-Oxo-carboxylates                                            | 0.01   | -0.45  | -0.26  | -0.84  |
| (2S)-2-amino-3-oxo-4-phosphooxybutanoate                   | Other Pathways | Compounds                                                     | 0.26   | 19.7   | 17.37  | 20.7   |
| 4-phosphooxy-L-threonine                                   | Other Pathways | Compounds                                                     | -0.1   | 0.14   | 0.62   | 0.09   |
| cycloheptadienyl                                           | Other Pathways | Compounds                                                     | 0.09   | 1.77   | 1.07   | 3.55   |
| D,L-5-fluorotryptophan                                     | Other Pathways | Compounds                                                     | -20.72 | -0.4   | -0.38  | -0.1   |
| L-leucyl-L-leucine                                         | Other Pathways | Dipeptides-Of-L-Amino-Acids                                   | 0.97   | -1.77  | 0.14   | -1.45  |
| myristate                                                  | Other Pathways | Long-Chain-234-Saturated-Fatty-Acids // Saturated-Fatty-Acids | -0.31  | 0.59   | 0.22   | -0.98  |
| sterone-ring                                               | Other Pathways | Rings                                                         | -0.2   | -19.04 | -1.7   | -19.04 |
| 2-deoxy-6-phospho-D-gluconate                              | Other Pathways | Compounds                                                     | -1.21  | 1.3    | 0.26   | 0.02   |
| L-cystine                                                  | Other Pathways | cystine // Non-standard-amino-acids                           | -0.06  | 1.78   | -1.1   | 3.05   |
| 7-hydroxyflavone                                           | Other Pathways | Flavones                                                      | -1.41  | -1.1   | 0.06   | -3     |
| o-topolin                                                  | Other Pathways | Compounds                                                     | 0.26   | 20.85  | 0.03   | 20.56  |
| CE±-oxo-1-carboxy-4-tetrahydrothiopyran propanoate S-oxide | Other Pathways | Compounds                                                     | -0.25  | -0.69  | -0.57  | -1.63  |
| 2-amino-3-(phosphomethylphosphinyl)propanoate              | Other Pathways | Compounds                                                     | 0.28   | 2.32   | 0.43   | 3.73   |
| N-(4-hydroxybenzoyl)-L-glutamate                           | Other Pathways | Monocarboxylic-Acid-Amides                                    | 0.26   | 19.01  | 0.03   | 19.02  |
| indolepropanol phosphate                                   | Other Pathways | Indole-Derivatives                                            | 0.67   | 1.08   | 0.79   | 1.11   |
| CE±-D-glucosamine 1-phosphate                              | Other Pathways | Sugar-Phosphate                                               | -8.45  | 10.66  | 8.69   | 11.56  |
| 5-methylcytidine                                           | Other Pathways | Compounds                                                     | -21.75 | -1.77  | -3.54  | -3.06  |
| 15-hydroxypentadecanoate                                   | Other Pathways | Compounds                                                     | 2.17   | 0.03   | -0.51  | -17.34 |
| pentachlorophenol                                          | Other Pathways | Chloroaromatic-Compounds                                      | 18.13  | 17.97  | 17.38  | 18.36  |
| risedronate                                                | Other Pathways | Compounds                                                     | 0.26   | -0.09  | 0.03   | 16.46  |
| 7-methylinosine                                            | Other Pathways | Modified-Nucleosides                                          | 0.04   | -0.7   | -0.3   | -1.53  |
| stearidonate                                               | Other Pathways | Long-Chain-234-Saturated-Fatty-Acids // Omega-3-              | 0.31   | -1.37  |        | -2.7   |



|                                   |                |                                                                                            |        |        |        |        |
|-----------------------------------|----------------|--------------------------------------------------------------------------------------------|--------|--------|--------|--------|
|                                   |                | Fatty-Acids                                                                                |        |        |        |        |
| 2',4,4',6'-tetrahydroxychalcone   | Other Pathways | Chalcones                                                                                  | -0.97  | -0.89  | 0.26   | -1.64  |
| (9Z,12E)-octadecadienoate         | Other Pathways | Long-Chain-234-Saturated-Fatty-Acids // Polyunsaturated-fatty-acids                        | 0.17   | -0.71  | -0.06  | -1.31  |
| (1,4)- $\alpha$ -xylobiose        | Other Pathways | 1-4-D-xylooligosaccharides // Disaccharides                                                | -21.29 | -12.2  | -21.45 | -1.86  |
| 8-oxo-deoxyguanosine              | Other Pathways | All-Nucleosides                                                                            | 0.26   | -0.09  | 0.03   | 21.58  |
| L-threo-sphinganine (C18)         | Other Pathways | DIHYDRO-SPHINGOSINE                                                                        | -21.41 | -0.69  | 0.03   | -0.68  |
| cetyltrimethylammonium            | Other Pathways | Organic-Cations // Quaternary-Amines                                                       | 0.01   | -0.61  | -0.03  | -0.98  |
| scutellarein                      | Other Pathways | Flavones                                                                                   | -0.66  | -20.94 | -20.82 | -2.15  |
| octyl $\alpha$ -D-glucopyranoside | Other Pathways | Glycolipids                                                                                | 0.17   | -1.59  | -0.35  | -1.66  |
| phytanate                         | Other Pathways | Saturated-Fatty-Acids // 3-Methyl-Saturated-Fatty-Acids                                    | 23.27  | 16.66  | -0.05  | 20.69  |
| dihydroisopteroate                | Other Pathways | Pterates                                                                                   | 0.26   | -0.09  | 0.03   | 20.32  |
| 9,10-epoxy-12-cis-octadecenoate   | Other Pathways | Epoxy-fatty-acids                                                                          | -0.14  | -1.58  | -0.31  | -2.66  |
| herbicide 14A                     | Other Pathways | Herbicides                                                                                 | -15.96 | -16.31 | -16.19 | 1.43   |
| (4E,8E)-sphingadiene              | Other Pathways | Sphingadiene                                                                               | -0.24  | -3.69  | -1.3   | -3.5   |
| 1-monopalmitolethylene glycol     | Other Pathways | Compounds                                                                                  | -0.42  | -4.66  | -1.34  | -5.33  |
| gondoate                          | Other Pathways | Long-Chain-234-Saturated-Fatty-Acids // Monounsaturated-fatty-acids // Omega-9-Fatty-Acids | 1.41   | -2.55  | -1.66  | -19.73 |
| sphinganine (C20)                 | Other Pathways | D-erythro-Shinganes                                                                        | -1.4   | -1.38  | -0.75  | -0.78  |
| 2-S-cysteinyldopa                 | Other Pathways | Quinones                                                                                   | 18.18  |        |        |        |
| (8E)-4-hydroxy-sphing-8-ene       | Other Pathways | CPD-17589                                                                                  | -0.45  | -3.57  | -1.36  | -5.5   |
| p-mercuribenzoate                 | Other Pathways | Compounds                                                                                  | 0.32   | 1.21   | 0.44   | 0.65   |
| coronatine                        | Other Pathways | Compounds                                                                                  | 0.2    | -1.25  | 0.44   | -2.52  |
| S-sulfanylgutathione (GSSH)       | Other Pathways | Perthiols // S-Substituted-Glutathione                                                     | 19.39  | 5.81   | 11.86  | 8.73   |
| F-dUMP                            | Other Pathways | Compounds                                                                                  | 1.41   | -1.45  | 0.79   | 0.63   |
| (S)-coreximine                    | Other Pathways | ALKALOID                                                                                   | 0.26   | -0.09  | 0.03   | 19.25  |

|                                                                                        |                |                                                        |       |       |       |        |
|----------------------------------------------------------------------------------------|----------------|--------------------------------------------------------|-------|-------|-------|--------|
| diphosphoglycolyl proline                                                              | Other Pathways | Compounds                                              | -0.97 | -1.27 | 0.43  | -0.54  |
| 2'-deoxyadenosine 3'-monophosphate                                                     | Other Pathways | Purine-deoxyribonucleotides // Deoxy-Ribonucleoside-3P | 0.48  | 1.83  | 0.2   | -1.44  |
| gibberellin A7                                                                         | Other Pathways | Gibberellins                                           | -1.65 | 0.22  | 2.38  | -3.35  |
| 3-dehydrosphinganine (C20)                                                             | Other Pathways | CPD-22221                                              | -0.41 | -1.34 |       | -1.19  |
| 1,3-diocanoyl-1,2,3-butanetriol                                                        | Other Pathways | Compounds                                              | 0.26  | -0.09 | 0.03  | 19.68  |
| 1,2-diocanoyl-1,2,4-butanetriol                                                        | Other Pathways | Compounds                                              | -0.46 | -1.75 | -0.54 | -2.78  |
| 2'-deoxyguanosine 3'-monophosphate                                                     | Other Pathways | Purine-deoxyribonucleotides // Deoxy-Ribonucleoside-3P | 0.01  | 2.59  | -1.82 | 2.65   |
| 4-amino-2-trifluoromethyl 5-hydroxymethylpyrimidine pyrophosphate                      | Other Pathways | Compounds                                              | 17.36 | 17.13 | 17.91 | -0.18  |
| 9-[6(RS)-C-carboxamido-5,6,7-trideoxy- $\alpha$ -D-ribooctofuranosyl]-9H-purin-6-amine | Other Pathways | Compounds                                              | 0.49  | -1.16 | -0.21 | 1.17   |
| tetraphosphate                                                                         | Other Pathways | Polyphosphates                                         | -0.35 | -0.82 | -0.88 | -22.35 |
| guazatine                                                                              | Other Pathways | Compounds                                              | 18.17 | -0.09 | 0.03  | -0.18  |
| guanosine 3'-monophosphate (3'-GMP)                                                    | Other Pathways | 3-Phosphomononucleotides // All-Nucleosides            | 18.65 | 18.22 | 17.71 | 18.41  |
| 1,2-diocanoyl-1-amino-2,3-propanediol                                                  | Other Pathways | Compounds                                              | 0.07  | -0.98 | -0.7  | -1.04  |
| 2-(3-benzoylphenyl)-3,5,7-trihydroxychromen-4-one                                      | Other Pathways | Flavonol-Derivatives                                   | -0.6  | -1.52 | -0.84 | -2     |
| 1,2-diocanoyl-3-methyl-1,2,3-butanetriol                                               | Other Pathways | Compounds                                              | -0.08 | 2.43  | -0.04 | 1.45   |
| gibberellin A46                                                                        | Other Pathways | Gibberellins                                           | 2.24  | 0.87  | 2.73  | 1.39   |
| 2,3-diocanoylglyceramide                                                               | Other Pathways | Compounds                                              | 1.37  | -2.06 | -0.01 | -2.2   |
| 2'-deoxyuridine 5'- $\alpha$ , $\beta$ -imido-diphosphate                              | Other Pathways | Compounds                                              | 0.26  | 17.57 | 0.03  | 18.53  |
| gibberellin A28                                                                        | Other Pathways | Gibberellins                                           | -0.37 | -1.23 | -1.06 | -1.45  |
| N2-hydroxyguanosine 5'-monophosphate                                                   | Other Pathways | Compounds                                              | 1.34  | -0.02 | 0.21  | -18.98 |

|                                                                 |                                   |                                        |        |        |        |        |
|-----------------------------------------------------------------|-----------------------------------|----------------------------------------|--------|--------|--------|--------|
| 3,5-dihydroxy-6,7-didehydro-12'-apo- $\epsilon$ -caroten-12'-al | Other Pathways                    | 12-apo-Carotenals                      | 0.63   | -0.79  | 1.01   | -0.79  |
| 1-palmitoleylglycerol 3-phosphate                               | Other Pathways                    | ACYL-SN-GLYCEROL-3P                    | 0.26   | -0.09  | 0.03   | 20.24  |
| piericidin A                                                    | Other Pathways                    | Antibiotics                            | 0.85   | -19.93 | 1.07   | -20.02 |
| 5'-(p-nitrophenyl)thioadenosine                                 | Other Pathways                    | C-nitro-compounds                      | 1.66   | -19.38 | 0.36   | -19.37 |
| tetrahydrothiamine diphosphate                                  | Other Pathways                    | ORGANOSULFUR                           | 17.59  | 17.46  | 0.03   | 18.1   |
| puromycin                                                       | Other Pathways                    | Peptidyl-nucleosides                   | 0.71   | 1.07   | 1.18   | 1.31   |
| scutellarin                                                     | Other Pathways                    | Flavones                               | 1.93   | 0.75   | 0.52   | -4.81  |
| 4-methylumbelliferyl- $\epsilon$ -D-cellobioside                | Other Pathways                    | Compounds                              | 5.97   | -11.63 | 6.97   | 1      |
| N10-(bromoacetyl)-5,8-dideazafofate                             | Other Pathways                    | Bromoaromatic-Compounds                | 0.4    | -16.94 | 0.94   | -17.03 |
| CDP- $\epsilon$ -D-glucose                                      | Other Pathways                    | NDP-alpha-D-glucoses // CDP-SUGARS     | -16.81 | -0.42  | -0.24  | -0.79  |
| uridine-5'-diphosphate bromoacetol                              | Other Pathways                    | Bromoaromatic-Compounds // Pyrimidines | -0.08  | -0.28  | -0.23  | -0.48  |
| all-trans-phytoene                                              | Other Pathways                    | carotenoids                            | 17.92  | 20.79  | 0.03   | 20.62  |
| bisorganyltrisulfane                                            | Other Pathways                    | Compounds                              | 17.44  | -0.09  | 0.03   | -0.18  |
| 5,10-methylenetetrahydropteroyl tri-L-glutamate                 | Other Pathways                    | METHYLENE-THF-GLU-N                    | 1.26   | -17.53 | -17.43 | -17.62 |
| plastoquinone-9                                                 | Other Pathways                    | PLASTOQUINONE                          | 0.23   | -0.39  | 0.04   | -1.07  |
| pelargonidin-3,5-diglucoside-5-O-caffeoylglycoside              | Other Pathways                    | Compounds                              | 0.46   | -0.21  | 0.03   | -0.89  |
| 1,2-dipalmitoyl-phosphatidylglycerol 1-phosphate                | Other Pathways                    | L-1-PHOSPHATIDYL-GLYCEROL-P            | 16.97  | 19.65  | 17.65  | 20.14  |
| maltopentaose                                                   | Other Pathways                    | Linear-Malto-Oligosaccharides          | 0.23   | -17.6  | 0.3    | -17.54 |
| ubiquinone-10                                                   | Other Pathways                    | Ubiquinones                            | -5.75  | -18.14 | 0.65   | -12.05 |
| feruloylacyetyl-CoA                                             | Secondary Metabolite Biosynthesis | All-Coas                               | -16.28 | 1.1    | 0.59   | 0.76   |
| (9Z,12Z,15Z)-hexadeca-9,12,15-trienoyl-CoA                      | Secondary Metabolite Biosynthesis | Long-Chain-Acyl-CoAs                   | -0.61  | -0.57  | -0.14  | -17.88 |
| N-methylaminobutanol                                            | Secondary Metabolite Biosynthesis | Compounds                              | 18.73  | 6.11   | 18.18  | 12.36  |
| (2S)-methylbutanenitrile                                        | Secondary Metabolite Biosynthesis | Nitriles                               | 0.22   | 18.15  |        |        |
| des-methyl avenacin                                             | Secondary                         | Triterpenes                            | 0.26   | -0.09  | 16.99  | -0.18  |

|                                  |                                   |                                                                      |        |        |        |        |
|----------------------------------|-----------------------------------|----------------------------------------------------------------------|--------|--------|--------|--------|
| A-1                              | Metabolite Biosynthesis           |                                                                      |        |        |        |        |
| 2-hydroxy-2-methylpropanenitrile | Secondary Metabolite Biosynthesis | Cyanohydrins // Aliphatic-S-hydroxynitriles                          | -19.74 | -13.76 | -6.64  | -13.34 |
| allylsulfenate                   | Secondary Metabolite Biosynthesis | Alkyl-Sulfenates // ORGANOSULFUR                                     | 6.19   | 7.16   | 6.95   | 6.35   |
| (Z)-2-methylpropanal-oxime       | Secondary Metabolite Biosynthesis | 2-methylpropanaloxime                                                | -1.06  | -1.47  | -0.1   | -2.3   |
| phenylacetaldehyde               | Secondary Metabolite Biosynthesis | Aryl-Aldehyde                                                        | 0.74   | -1.86  | -0.43  | -3.08  |
| 2-phenylethylamine               | Secondary Metabolite Biosynthesis | Aralkylamines                                                        | -0.88  | -2.53  | -2.54  | -2.86  |
| tropinone                        | Secondary Metabolite Biosynthesis | Compounds                                                            | -0.85  | -2.55  | -2.44  | -2.92  |
| dimethylsulfoniopropanoate-amine | Secondary Metabolite Biosynthesis | ORGANOSULFUR                                                         | 0.98   | -0.08  | -0.39  | -1.03  |
| 3,6-dihydronicotinate            | Secondary Metabolite Biosynthesis | Vitamins                                                             | -0.52  | -0.82  | -0.25  | -2.19  |
| phloroglucinol                   | Secondary Metabolite Biosynthesis | Compounds                                                            | -21.73 | 1.6    | -0.1   | 1.59   |
| indolin-2-one                    | Secondary Metabolite Biosynthesis | Indole-Derivatives                                                   | 0.47   | 3.36   | 0.31   | 3.11   |
| indoxyl                          | Secondary Metabolite Biosynthesis | Indole-Derivatives                                                   | 18.17  |        |        |        |
| tyramine                         | Secondary Metabolite Biosynthesis | Aralkylamines                                                        | 0.75   | -1.88  | -0.46  | -3.08  |
| 5-oxooctanal                     | Secondary Metabolite Biosynthesis | Compounds                                                            | -2.28  | -1.57  | 1.61   | 1.6    |
| conhydrine                       | Secondary Metabolite Biosynthesis | ALKALOID                                                             | -0.18  | -18.04 | -0.06  | -18.14 |
| CEZ-coniceine                    | Secondary Metabolite Biosynthesis | ALKALOID                                                             | -0.03  | -17.89 | -17.76 | -17.98 |
| nicotinate                       | Secondary Metabolite Biosynthesis | B-vitamins                                                           | 0.26   | -0.09  | 0.03   | 18.83  |
| HBOA                             | Secondary Metabolite Biosynthesis | Benzoxazinoids                                                       | 0.26   | 20.13  | 0.03   | 18.96  |
| L-phenylalanine                  | Secondary Metabolite Biosynthesis | Amino-Acids-20 // Aromatic-L-Amino-Acids // Non-polar-amino-acids // | 0.26   | -0.09  | 0.03   | 20.17  |

|                                           |                                   |                                             |        |        |        |        |
|-------------------------------------------|-----------------------------------|---------------------------------------------|--------|--------|--------|--------|
|                                           |                                   | Phenylpropanoids                            |        |        |        |        |
| 4-coumaraldehyde                          | Secondary Metabolite Biosynthesis | Phenylpropanoids                            | 0.62   | -3.03  | -0.51  | -3.37  |
| (+)-carvone                               | Secondary Metabolite Biosynthesis | Carvones                                    | 0.6    | -0.84  | -0.14  | -0.66  |
| nornicotine                               | Secondary Metabolite Biosynthesis | Compounds                                   | -0.07  | -1.37  | -0.53  | -2.42  |
| xanthine                                  | Secondary Metabolite Biosynthesis | Compounds                                   | 0.27   | -0.89  | 0.08   | -1.66  |
| (S)-4-hydroxymandelonitrile               | Secondary Metabolite Biosynthesis | Aromatic-S-hydroxynitriles                  | 0.22   | 20.58  |        | 20.61  |
| (3E)-4,8-dimethylnona-1,3,7-triene        | Secondary Metabolite Biosynthesis | Homoterpenoids                              | 0.9    | -0.49  | 0.18   | 0.15   |
| alliin                                    | Secondary Metabolite Biosynthesis | S-Alkyl-L-Cysteine-S-Oxides // ORGANOSULFUR | 0.03   | 0.03   | 0.03   | 21.8   |
| methylcinnamate                           | Secondary Metabolite Biosynthesis | Aromatics                                   | 14.68  | 14.3   | 0.04   | 20.65  |
| tryptamine                                | Secondary Metabolite Biosynthesis | Indole-Derivatives                          | -1.62  | -1.38  | -0.2   | -1.35  |
| 4-hydroxyphenylbutan-2-one                | Secondary Metabolite Biosynthesis | POLYKETIDE                                  | 0.26   | -0.09  | 0.03   | 21.24  |
| (6E)-8-oxogeranial                        | Secondary Metabolite Biosynthesis | Monoterpenals                               | 0.26   | 19.83  | 0.03   | 21.06  |
| 3-methoxytyramine                         | Secondary Metabolite Biosynthesis | Guaiacols                                   | -0.63  | 1.26   | 0.24   | 1.62   |
| (E)-7-(methylsulfanyl)heptanal oxime      | Secondary Metabolite Biosynthesis | CPD-19472                                   | -1.39  | -1.1   | 0.52   | -2.31  |
| (Z)-3-(2,4-dihydroxyphenyl)-prop-2-enoate | Secondary Metabolite Biosynthesis | Phenylpropanoids // Aromatic-Acid           | 0.26   | 17.27  | 0.03   | 18.46  |
| 2,4-dihydroxycinnamate                    | Secondary Metabolite Biosynthesis | Compounds                                   | 0.94   | 0.71   | -16.53 | 1.9    |
| dihydroconiferyl aldehyde                 | Secondary Metabolite Biosynthesis | Compounds                                   | 0.02   | 1.74   | 0.41   | 3.03   |
| 3,6-dihydronicotine                       | Secondary Metabolite Biosynthesis | ALKALOID                                    | -0.68  | -0.25  | -0.63  | -0.38  |
| α-fenchene                                | Secondary Metabolite Biosynthesis | Compounds                                   | -13.07 | -13.07 | -13.07 | -13.07 |
| 4-(1-methyl-2-                            | Secondary                         | Compounds                                   | 0.97   | -2.43  | -0.47  | -2.78  |

|                                                                       |                                   |                                           |        |       |        |       |
|-----------------------------------------------------------------------|-----------------------------------|-------------------------------------------|--------|-------|--------|-------|
| pyrrolidinyl)-3-oxobutanoate                                          | Metabolite Biosynthesis           |                                           |        |       |        |       |
| 2-[(2'-methylsulfanyl)propyl]maleate                                  | Secondary Metabolite Biosynthesis | CPD-19484                                 | -0.75  | -1.94 | 0.12   | -0.95 |
| N-hydroxy-L-dihomomethionine                                          | Secondary Metabolite Biosynthesis | N-hydroxy-n-homomethionine                | -0.48  | 0.29  | 0.44   | -0.64 |
| caffeine                                                              | Secondary Metabolite Biosynthesis | Compounds                                 | -0.78  | 0.82  | 0.36   | 0.92  |
| N,N-dihydroxy-L-phenylalanine                                         | Secondary Metabolite Biosynthesis | N-hydroxylated-Amino-Acids                | 0.3    | -1.83 | 0.12   |       |
| leucodopachrome                                                       | Secondary Metabolite Biosynthesis | ALKALOID // Indole-Derivatives            | -11.05 | -5.92 | -11.27 | 6.47  |
| 3-carboxy-6-(methylsulfanyl)-2-oxohexanoate                           | Secondary Metabolite Biosynthesis | CPD-21521                                 | -1.25  | -1.29 | -0.01  | -2.8  |
| (E)- $\alpha$ -(methylsulfanyl)heptyl-thiohydroximate                 | Secondary Metabolite Biosynthesis | n-methylthioalkylhydroximate              | 0.26   | 19.15 | 0.03   | 19.67 |
| 3-oxo-dodecanoate                                                     | Secondary Metabolite Biosynthesis | CPD-12642                                 | -0.2   | -1.42 | -0.25  | -2.45 |
| bergapten                                                             | Secondary Metabolite Biosynthesis | Furanocoumarins                           | 0.26   | -0.09 | 0.03   | 21.27 |
| 3-deoxycapsidiol                                                      | Secondary Metabolite Biosynthesis | Sesquiterpenes                            | 0.26   | -0.09 | 0.03   | 19.98 |
| [(4S)-4-(5,5-dimethylcyclohex-1-en-1-yl)-cyclohex-1-en-1-yl] methanol | Secondary Metabolite Biosynthesis | Sesquiterpenes                            | 7.56   | 7.19  | 7.4    | 7.8   |
| 3-[(3'-methylsulfanyl)propyl]malate                                   | Secondary Metabolite Biosynthesis | CPD-19483                                 | 0.77   | 1.55  | 0.74   | 2.33  |
| (3E,7E)-4,8,12-trimethyltrideca-1,3,7,11-tetraene (TMTT)              | Secondary Metabolite Biosynthesis | Homoterpenoids                            | 0.4    | -1.32 | -0.09  | -0.2  |
| coniferyl acetate                                                     | Secondary Metabolite Biosynthesis | Coniferyl-Esters // Secondary-Metabolites | -0.61  | -0.36 | 0.9    | 0.72  |
| pinosylvin monomethylether                                            | Secondary Metabolite Biosynthesis | Compounds                                 | 7.14   | -6.78 | -6.66  | 15.4  |
| (R)-5-phosphomevalonate                                               | Secondary Metabolite Biosynthesis | Compounds                                 | 0.26   | -0.09 | 0.03   | 17.19 |
| (+)-heliannuol K                                                      | Secondary Metabolite Biosynthesis | Sesquiterpenes                            | 0.22   | -0.13 | 9.83   | 19.65 |
| (-)-patchoulol                                                        | Secondary Metabolite              | Sesquiterpenes                            | 1.1    | -0.19 | -0.27  | -0.24 |

|                                          |                                   |                                   |        |       |       |        |
|------------------------------------------|-----------------------------------|-----------------------------------|--------|-------|-------|--------|
|                                          | Biosynthesis                      |                                   |        |       |       |        |
| petivericin                              | Secondary Metabolite Biosynthesis | CPD-17425                         | -0.38  | -1.86 | -0.45 | -2.5   |
| heliannuol C                             | Secondary Metabolite Biosynthesis | Sesquiterpenes                    | 1.01   | 2.1   | -0.08 | 0.13   |
| 2-[(2'-methylsulfanyl)heptyl]maleate     | Secondary Metabolite Biosynthesis | CPD-19484                         | -1.51  | -0.61 | -1.65 | -15.15 |
| 2-[(6'-methylsulfanyl)hexyl]malate       | Secondary Metabolite Biosynthesis | CPD-19482                         | 20.33  |       |       | 19.03  |
| D-mannitol 1-phosphate                   | Secondary Metabolite Biosynthesis | Alditol-phosphates                | 0.26   | -0.09 | 0.03  | 19.59  |
| 2-carboxy-D-arabinitol 1-phosphate       | Secondary Metabolite Biosynthesis | Compounds                         | 0.26   | 17.86 | 0.03  | 18.39  |
| 4'-O-methylnorbelladine                  | Secondary Metabolite Biosynthesis | Compounds                         | 0.25   | 14.15 | 0.07  | 7.13   |
| 2'-O-methylisoliquiritin                 | Secondary Metabolite Biosynthesis | Compounds                         | -1.7   | 0.29  | 0.28  | -0.95  |
| (3R,4R)-7,2',4'-trihydroxyisoflavanol    | Secondary Metabolite Biosynthesis | 4R-4-2prime-dihydroxyisoflavans   | 0.26   | -0.09 | 0.03  | 19     |
| 7-hydroxy-4'5'-dimethoxyisoflavone       | Secondary Metabolite Biosynthesis | Isoflavones                       | 0.65   | -0.81 | 0.19  | -1.15  |
| 3-[(7'-methylsulfanyl)heptyl]malate      | Secondary Metabolite Biosynthesis | CPD-19483                         | 0.71   | -0.58 | 0.27  | -0.96  |
| 2-phenylethyl $\beta$ -D-glucopyranoside | Secondary Metabolite Biosynthesis | Compounds                         | -2.67  | -2.53 | -1.61 | -0.98  |
| xanthosine                               | Secondary Metabolite Biosynthesis | Purine-Ribonucleosides            | 0.15   | -0.92 | -0.11 | -1.26  |
| 11-hydroxyvittatine                      | Secondary Metabolite Biosynthesis | Compounds                         | -21.86 | 0.4   | 0.37  | -1.16  |
| lycorine                                 | Secondary Metabolite Biosynthesis | Compounds                         | 2.47   | 0.4   | 0.37  | -1.16  |
| shikonin                                 | Secondary Metabolite Biosynthesis | Quinones // Secondary-Metabolites | 0.54   | 2.12  | 0.96  | 2.68   |
| ponciretin                               | Secondary Metabolite Biosynthesis | 4-Methoxyflavanones               | -1.85  | -3.58 | -2.51 | -3.7   |
| manoyl oxide                             | Secondary Metabolite Biosynthesis | Diterpenes                        | 0.46   | -0.76 | -0.72 | -3.66  |
| (-)-epicatechin                          | Secondary                         | CPD-10414                         | 1.15   | -1.72 | 0.77  | -1.74  |

|                                                               |                                   |                                   |        |       |       |       |
|---------------------------------------------------------------|-----------------------------------|-----------------------------------|--------|-------|-------|-------|
|                                                               | Metabolite Biosynthesis           |                                   |        |       |       |       |
| (2R,3S,4S)-leucopelargonidin                                  | Secondary Metabolite Biosynthesis | CPD-11512                         | 18.03  |       |       | 19.27 |
| salicylate &beta;-D-glucose ester                             | Secondary Metabolite Biosynthesis | Glycosyl-Esters // Aromatics      | -0.96  | -1.04 | 0.11  | 1.41  |
| (S)-N-methylcoclaurine                                        | Secondary Metabolite Biosynthesis | Compounds                         | 21.74  | -0.05 |       | 21.02 |
| 3''-deamino-3''-oxonicotianamine                              | Secondary Metabolite Biosynthesis | Compounds                         | 0.42   | -0.94 | 0.09  | -1.38 |
| plaunotol                                                     | Secondary Metabolite Biosynthesis | Isoprenoid-Derivatives            | -0.93  | -0.15 | -0.95 | 0.08  |
| (R)-mevalonate diphosphate                                    | Secondary Metabolite Biosynthesis | Compounds                         | 0.26   | 16.78 | 0.03  | 17.92 |
| geranylgeraniol                                               | Secondary Metabolite Biosynthesis | Methyl-Branched-Lipids // Prenols | 0.26   | -0.09 | 0.03  | 17.92 |
| cinnamoyl-β-D-glucoside                                       | Secondary Metabolite Biosynthesis | Beta-D-glucosides                 | -0.33  | -5.92 | -5.96 | -7.39 |
| chrysanthemyl diphosphate                                     | Secondary Metabolite Biosynthesis | Compounds                         | -0.84  | 1.95  | 0.66  | 1.54  |
| dhurrin                                                       | Secondary Metabolite Biosynthesis | Nitriles                          | 0.19   | -0.93 | -0.2  | -1.12 |
| (Z)-1-(L-cysteinyglycin-S-yl)-N-hydroxy-2-phenylethan-1-imine | Secondary Metabolite Biosynthesis | CPD-6262                          | -18.26 | 1.73  | 0.37  | 1.35  |
| kauralexin A3                                                 | Secondary Metabolite Biosynthesis | Kauralexins                       | 1.47   | -0.1  | 2.31  | -1.23 |
| (S)-3'-hydroxy-N-methylcoclaurine                             | Secondary Metabolite Biosynthesis | Compounds                         | -0.26  | -0.58 | 0.06  | -1.64 |
| ent-cassa-12,15-diene-2β,3β-diol-11-one                       | Secondary Metabolite Biosynthesis | Diterpenes                        | -0.71  | -2.05 | -1.42 | -3.32 |
| peonidin                                                      | Secondary Metabolite Biosynthesis | Anthocyanidins                    | -0.02  | -0.17 | -0.02 | 13.05 |
| (2R,3S,4S)-leucodelphinidin                                   | Secondary Metabolite Biosynthesis | CPD-11512                         | 0.33   | -1.2  | -0.16 | -1.61 |
| quinine                                                       | Secondary Metabolite Biosynthesis | Quinoline-MIAs                    | 10.33  | -2.35 | 10.09 | 12.68 |
| (S)-cheilanthifoline                                          | Secondary Metabolite Biosynthesis | Compounds                         | 20.38  |       |       |       |



|                                           |                                   |                                    |       |        |       |        |
|-------------------------------------------|-----------------------------------|------------------------------------|-------|--------|-------|--------|
| hyperxanthone E                           | Secondary Metabolite Biosynthesis | Secondary-Metabolites // Aromatics | -0.19 | -0.87  | 0.38  | -0.92  |
| taxa-4(20),11-dien-5-<br>-yl acetate      | Secondary Metabolite Biosynthesis | Compounds                          | -4.62 | -6.04  | -5.17 | -6.04  |
| 3,7-<br>dimethylquercetin                 | Secondary Metabolite Biosynthesis | Flavonol-Derivatives               | 0.26  | 19.64  | 0.03  | 19.13  |
| 4-coumaroyl-4'-<br>hydroxyphenyllactate   | Secondary Metabolite Biosynthesis | Compounds                          | -0.1  |        | 18.9  |        |
| robustaquinone A                          | Secondary Metabolite Biosynthesis | Hydroxyanthraquinones              | 20.85 | 20.72  | 0.03  | 21.21  |
| 9-<br>demethylmunduserone                 | Secondary Metabolite Biosynthesis | Compounds                          | 0.26  | -0.09  | 0.03  | 18.5   |
| kauralexin A2                             | Secondary Metabolite Biosynthesis | Kauralexins                        | 0.26  | -0.09  | 0.03  | 20.83  |
| demethoxycurcumin                         | Secondary Metabolite Biosynthesis | Secondary-Metabolites              | 0.26  | 21.92  | 0.03  | 13.94  |
| columbamine                               | Secondary Metabolite Biosynthesis | Compounds                          | 23.4  |        | 19.42 |        |
| glyceollin II                             | Secondary Metabolite Biosynthesis | Glyceollins                        | 14.61 | 15.63  | -6.29 | 7.64   |
| sinapoyl-(S)-malate                       | Secondary Metabolite Biosynthesis | Compounds                          | 0.77  | -0.29  | -0.04 | -1.64  |
| 3,7-<br>dimethylmyricetin                 | Secondary Metabolite Biosynthesis | Flavonol-Derivatives               | -0.18 | -1.56  | 0.46  | -3.56  |
| 13-[(E)-2-<br>methylcrotonoyl]oxylupanine | Secondary Metabolite Biosynthesis | Compounds                          | 0.39  | -0.83  | 0.37  | -1.43  |
| polyneuridine<br>aldehyde                 | Secondary Metabolite Biosynthesis | Compounds                          | 0.26  | -0.09  | 0.03  | 22.37  |
| hinokinin                                 | Secondary Metabolite Biosynthesis | LIGNAN                             | 1.74  | 3.4    | -0.83 | 3.76   |
| carnosate                                 | Secondary Metabolite Biosynthesis | Diterpenes                         | 0.26  | -0.09  | 0.03  | 20.41  |
| scopolin                                  | Secondary Metabolite Biosynthesis | Compounds                          | 1.23  | 0.81   | -0.77 | -0.34  |
| 2,3-<br>dehydrokievitone                  | Secondary Metabolite Biosynthesis | Compounds                          | 0.33  | 19.58  | 0.27  | 12.74  |
| gluconapin                                | Secondary Metabolite Biosynthesis | alkenyl-glucosinolate              | -0.51 | -19.05 | -0.56 | -19.15 |

|                                                                       |                                   |                                            |        |        |        |        |
|-----------------------------------------------------------------------|-----------------------------------|--------------------------------------------|--------|--------|--------|--------|
| D-galactosylononitol                                                  | Secondary Metabolite Biosynthesis | Methyl-Inositols // Galactosyl-Inositols   | -18.75 | 0.95   | 1.87   | 0.61   |
| sinigrin                                                              | Secondary Metabolite Biosynthesis | alkenyl-glucosinolate                      | -0.88  | -2.28  | -0.75  | -2.44  |
| rosmarinic acid                                                       | Secondary Metabolite Biosynthesis | Compounds                                  | -17.79 | 3.21   | -18.01 | 3.06   |
| gibberellin A37                                                       | Secondary Metabolite Biosynthesis | Gibberellins                               | 0.26   | -0.09  | 0.03   | 19.73  |
| 7-(methylsulfonyl)heptyl-desulfoglucosinolate                         | Secondary Metabolite Biosynthesis | Desulfoglucosinolates                      | 1.37   | -2.02  | 0.38   | -2.96  |
| dopaxanthin quinone                                                   | Secondary Metabolite Biosynthesis | ALKALOID                                   | -1.43  | -18.05 | -1.37  | -6.44  |
| 2'-hydroxy 3,6,7,3',4'-pentamethylquercetin                           | Secondary Metabolite Biosynthesis | Flavonol-Derivatives                       | 1.64   | -0.04  | 0.6    | -0.04  |
| dopaxanthin                                                           | Secondary Metabolite Biosynthesis | ALKALOID                                   | 1.59   | -19.35 | 0.39   | -19.45 |
| O-sinapoylglucuronate                                                 | Secondary Metabolite Biosynthesis | Compounds                                  | 1.23   | -16.93 | -0.12  | -4.56  |
| (-)-yatein                                                            | Secondary Metabolite Biosynthesis | LIGNAN                                     | 0.95   | -3.03  | 0.27   | -3.97  |
| glucoraphanin                                                         | Secondary Metabolite Biosynthesis | omega-methylsulfinylalkyl glucosinolate    | -0.01  | -1.72  | -0.15  | -1.82  |
| oleanolic aldehyde                                                    | Secondary Metabolite Biosynthesis | Triterpenes                                | 1.63   | 1.67   | 0.9    | 0.43   |
| baicalin                                                              | Secondary Metabolite Biosynthesis | Flavones                                   | -1.19  | 0.3    | 0.8    | -0.7   |
| (-)-maackiain-3-O-glucoside                                           | Secondary Metabolite Biosynthesis | Compounds                                  | -1.19  | -0.83  | 0.59   | -0.02  |
| <i>N</i>-<math>\beta</math>-D-glucosyl-(indol-3-yl)acetyl-L-aspartate | Secondary Metabolite Biosynthesis | Indole-Derivatives // Modified-Amino-Acids | 1.58   | 1.18   | 0.3    | 1.56   |
| hederagenin                                                           | Secondary Metabolite Biosynthesis | Triterpenes                                | 1.01   | -0.15  | -0.46  | -0.05  |
| isorhamnetin 3-O-glucoside                                            | Secondary Metabolite Biosynthesis | Flavonol-3-O-Glycosides                    | 1.11   | -6.73  | -0.96  | -11.95 |
| 4-methoxyglucobrassicin                                               | Secondary Metabolite Biosynthesis | Indolic-glucosinolates                     | -0.87  | 0.49   | 0.81   | 2.15   |

|                                                          |                                   |                                            |        |        |       |        |
|----------------------------------------------------------|-----------------------------------|--------------------------------------------|--------|--------|-------|--------|
| quercetin-3-glucoside                                    | Secondary Metabolite Biosynthesis | Flavonol-3-O-B-D-Glucosides                | 0.26   | 18.97  | 0.03  | 18.82  |
| quercetin 3-galactoside                                  | Secondary Metabolite Biosynthesis | Flavonol-3-O-Glycosides                    | -1.29  | -1.03  | 0.7   | -1.17  |
| glucomalcommin                                           | Secondary Metabolite Biosynthesis | Aliphatic-glucosinolates                   | 0.22   | 20.47  | 17.25 | 20.46  |
| luteolin 7-O-(E)-D-glucuronide                           | Secondary Metabolite Biosynthesis | Compounds                                  | 0.33   | 12.02  | 0.1   | 11.99  |
| 8-(methylsulfinyl)octyl-glucosinolate                    | Secondary Metabolite Biosynthesis | Omega-methylthio-alkyl-glucosinolates      | -0.3   | 2.37   | -0.28 | -0.69  |
| patulitrin                                               | Secondary Metabolite Biosynthesis | Flavonol-Derivatives                       | 1.91   | -16.74 | 0.26  | -16.83 |
| 3-(O-&beta;-glucosyl)-(2-oxindol-3-yl)acetyl-L-aspartate | Secondary Metabolite Biosynthesis | Indole-Derivatives // Modified-Amino-Acids | 0.97   | 2.21   | 0.3   | 1.85   |
| 8-(methylsulfinyl)octyl-glucosinolate                    | Secondary Metabolite Biosynthesis | omega-methylsulfinylalkylglucosinolate     | 6.79   | 18.31  | 18.06 | 18.46  |
| 2-benzoyloxy-3-butenylglucosinolate                      | Secondary Metabolite Biosynthesis | Compounds                                  | -17.58 | 0.63   | -0.33 | 0.14   |
| 4-benzoyloxybutylglucosinolate                           | Secondary Metabolite Biosynthesis | Compounds                                  | 6.23   | -11.51 | -11.4 | 1.03   |
| hypericin                                                | Secondary Metabolite Biosynthesis | Dyes                                       | 0.26   | 17.1   | 17.53 | 16.49  |
| malonylgenistin                                          | Secondary Metabolite Biosynthesis | Compounds                                  | 19.96  | -0.09  | 0.03  | -0.18  |
| malonyldaidzin                                           | Secondary Metabolite Biosynthesis | Compounds                                  | -16.97 | -0.09  | 0.13  | 0.33   |
| eupatolitin 3-glucoside                                  | Secondary Metabolite Biosynthesis | Flavonol-Derivatives                       | 1.37   | 0.4    | -0.24 | -6.5   |
| cyclo-dopa glucuronosyl glucoside                        | Secondary Metabolite Biosynthesis | ALKALOID                                   | 0.26   | -0.09  | 16.53 | -0.18  |
| curcumin monoglucoside                                   | Secondary Metabolite Biosynthesis | POLYKETIDE // Phenols // Phenylpropanoids  | 1.11   | -0.13  | 0.16  | -0.78  |
| raucaffricine                                            | Secondary Metabolite Biosynthesis | Ajmalan-MIAs                               | 0.94   | 1.36   | 1.31  | 1.61   |
| cyanidin 3-O-(6"-O-malonyl)-E-D-glucoside                | Secondary Metabolite Biosynthesis | Anthocyanidin-malonyl-beta-D-glucosides    | 0.26   | 19.32  | 0.03  | -0.03  |
| 3,7,3',4'-tetramethylquerceti                            | Secondary Metabolite              | Flavonol-Derivatives                       | -0.11  | -4.74  | 2.24  | -4.31  |

|                                                                  |                                   |                                         |        |        |        |        |
|------------------------------------------------------------------|-----------------------------------|-----------------------------------------|--------|--------|--------|--------|
| n 2'-O-( $\beta$ -D-glucoside)                                   | Biosynthesis                      |                                         |        |        |        |        |
| pelargonidin 3-O-(6"-O-malyl-( $\beta$ -D-glucoside))            | Secondary Metabolite Biosynthesis | Anthocyanins                            | 0.28   | -1.73  | -0.99  | 0.34   |
| cyanidin 3-O-(6"-O-malyl-( $\beta$ -D-glucoside))                | Secondary Metabolite Biosynthesis | Anthocyanidin-malonyl-beta-D-glucosides | -0.25  | -17.39 | 0.04   | -17.49 |
| 9,9'-di-cis-( $\beta$ -carotene                                  | Secondary Metabolite Biosynthesis | Carotenes                               | 0.53   | -0.27  | -0.16  | -0.27  |
| pelargonidin 3-O-( $\beta$ -D-sambubioside                       | Secondary Metabolite Biosynthesis | Anthocyanins                            | 1.29   | 0.14   | -0.53  | -0.09  |
| canthaxanthin                                                    | Secondary Metabolite Biosynthesis | Ketocarotenoids                         | 0.41   | -1.39  | -0.56  | -0.82  |
| isovitexin-7-O-xyloside                                          | Secondary Metabolite Biosynthesis | Flavones                                | 0.26   | 18.72  | 0.03   | 18.99  |
| 15-cis-phytoene                                                  | Secondary Metabolite Biosynthesis | carotenoids                             | 0.26   | 20.79  | 0.03   | 20.62  |
| gomphrenin I                                                     | Secondary Metabolite Biosynthesis | ALKALOID                                | 0.22   | 18.13  | 0.03   | 16.63  |
| maysin                                                           | Secondary Metabolite Biosynthesis | Flavones                                | -1.12  | -1.83  | -1.2   | -19    |
| vitexin 2"-O-( $\beta$ -L-rhamnoside                             | Secondary Metabolite Biosynthesis | Compounds                               | 1.79   | 0.12   |        | -5.82  |
| isovitexin 2"-O-( $\beta$ -D-glucoside                           | Secondary Metabolite Biosynthesis | Compounds                               | -19.21 | -19.21 | -1.11  | -19.29 |
| apigenin 7-O-[( $\beta$ -D-apiosyl-(1,6)- $\beta$ -D-glucoside]  | Secondary Metabolite Biosynthesis | Compounds                               | 1.74   | 1.26   | 0.08   | 1.54   |
| 4-sinapoyloxybutylglucosinolate                                  | Secondary Metabolite Biosynthesis | Compounds                               | -10.71 | -10.77 | -10.94 | 8.26   |
| cyanidin 3-O-( $\beta$ -D-xylosyl-(1,6)- $\beta$ -D-galactoside) | Secondary Metabolite Biosynthesis | Anthocyanins                            | 17.8   | -0.09  | 0.03   | -0.19  |
| isorhamnetin 3-O-(3"-O-p-coumaroyl)-glucoside                    | Secondary Metabolite Biosynthesis | Flavonol-Derivatives                    | 0.08   | -1.59  | -0.44  | -2.63  |
| quercetin 3-O-(4"-O-p-coumaroyl)-glucoside                       | Secondary Metabolite Biosynthesis | Flavonol-Derivatives                    | 0.68   | -0.22  | 0.22   | -1.05  |
| quercetin 3, 3', 4', 7-tetrasulfate                              | Secondary Metabolite Biosynthesis | Flavonol-Derivatives                    | 0.19   | 11.58  | 17.05  | 10.78  |
| quercetin 3,7-O-diglucoside                                      | Secondary Metabolite Biosynthesis | Flavonol-Derivatives                    | 5.58   | -5.66  | 7.18   | -11.26 |

|                                                                                                                    |                                   |                                            |        |        |        |        |
|--------------------------------------------------------------------------------------------------------------------|-----------------------------------|--------------------------------------------|--------|--------|--------|--------|
| <i>N</i>-[&beta;-glucosyl-(1,4)-&beta;-glucosyl]-(oxindol-3-yl)acetyl-aspartate                                    | Secondary Metabolite Biosynthesis | Indole-Derivatives // Modified-Amino-Acids | -19.27 | -19.54 | -19.27 | -7.32  |
| dalnigrein 7-O-<math>\beta</math>-D-apiofuranosyl-(1-6)-<math>\beta</math>-D-glucopyranoside                       | Secondary Metabolite Biosynthesis | Isoflavones                                | 17.36  | -0.08  |        | -0.03  |
| rubusoside                                                                                                         | Secondary Metabolite Biosynthesis | Diterpenes                                 | 0.32   | -2.12  | 1.21   |        |
| 16- $\alpha$ -hydroxygypsogenate-28- $\beta$ -D-glucoside                                                          | Secondary Metabolite Biosynthesis | Triterpenes                                | -0.02  | -2.38  | -0.34  | -21.62 |
| N-debenzoyl-(3'-RS)-2'-deoxytaxol                                                                                  | Secondary Metabolite Biosynthesis | ALKALOID                                   | 6.95   | 6.07   | 6.95   | -0.61  |
| dihydroxyferuloyl-sinapoyl spermidine                                                                              | Secondary Metabolite Biosynthesis | Compounds                                  | 17.61  | -0.09  | 0.03   | -0.18  |
| N-debenzoyl-(3'-RS)-taxol                                                                                          | Secondary Metabolite Biosynthesis | ALKALOID                                   | 17.31  | 16.98  | 0.03   | 18.06  |
| quercetin 3-O-(3',6"-O-di-p-coumaroyl)-glucoside                                                                   | Secondary Metabolite Biosynthesis | Flavonol-Derivatives                       | 0.6    | -19.2  |        | -1.01  |
| kaempferol 3-O-(4",6"-O-di-p-coumaroyl)-glucoside                                                                  | Secondary Metabolite Biosynthesis | Flavonol-Derivatives                       | 0.49   | -0.2   | 0.06   | -0.89  |
| cyanidin 3-O-(6-O-<math>\beta</math>-D-glucosyl-2-O-<math>\beta</math>-D-xylosyl-<math>\beta</math>-D-galactoside) | Secondary Metabolite Biosynthesis | Anthocyanins                               | 0.58   | -0.15  | 0.09   | -0.9   |
| (20S)-ginsenoside Rg3                                                                                              | Secondary Metabolite Biosynthesis | 3GlcGlc-Protopanaxadiol-ginsenosides       | 1.12   | 4.44   | 0.63   | 5.08   |
| oleanolate 3- $\beta$ -D-glucuronoside-(3,1)-galactoside                                                           | Secondary Metabolite Biosynthesis | Triterpenes                                | 18.31  | 18.16  | 17.42  | 19.13  |
| monodeglucosyl-des-acyl avenacin A                                                                                 | Secondary Metabolite Biosynthesis | Triterpenes                                | 16.41  | 14.14  | 16.91  | 5.76   |
| <math>\beta</math>-D-gentiobiosyl <math>\beta</math>-D-glucosyl crocetin                                           | Secondary Metabolite Biosynthesis | Beta-D-glucosides // Glycosyl-Esters       | 18.07  | -0.1   | 0.03   | 10.83  |
| vincristine                                                                                                        | Secondary Metabolite Biosynthesis | Organic-heteroptetracyclic-compounds       | 19.21  | -0.1   | 0.04   | 13.52  |
| curcumin 4'-O-<math>\beta</math>-D-gentiotrioside                                                                  | Secondary Metabolite Biosynthesis | POLYKETIDE // Phenols // Phenylpropanoids  | -0.08  | -18.21 | -1.19  | -18.32 |
| ternatin C5                                                                                                        | Secondary Metabolite Biosynthesis | Anthocyanins                               | -16.43 | -16.78 | -0.09  | -16.87 |

|                                                                                                                              |                                   |                                                                    |        |        |       |        |
|------------------------------------------------------------------------------------------------------------------------------|-----------------------------------|--------------------------------------------------------------------|--------|--------|-------|--------|
| cyanidin O-O-[6-O-(6-O-4-hydroxycinnamoyl- $\beta$ -D-glucosyl)-2-O- $\beta$ -D-xylosyl- $\beta$ -D-galactoside]             | Secondary Metabolite Biosynthesis | Anthocyanins                                                       | 0.23   | -18.02 | -0.08 | -18.12 |
| kaempferol 3-O-[6-(4-coumaroyl)- $\beta$ -D-glucosyl-(1 $\rightarrow$ 2)-glucosyl-(1 $\rightarrow$ 2)- $\beta$ -D-glucoside] | Secondary Metabolite Biosynthesis | Flavonol-Derivatives                                               | -0.35  | -0.05  | 0.27  | -0.67  |
| (2R)-2-hydroxy-2-methylbutanenitrile                                                                                         | Secondary Metabolite Degradation  | 2-Hydroxy-2-methylbutyronitriles<br>// Aliphatic-R-hydroxynitriles | -20.41 | 0.88   | 0.01  | 1.52   |
| indole-3-carbinol                                                                                                            | Secondary Metabolite Degradation  | Indole-Phytoalexins                                                | -1.73  | -1.62  | -0.73 | -0.33  |
| benzylisothiocyanate                                                                                                         | Secondary Metabolite Degradation  | ISOTHIOCYANATES                                                    | -0.7   | -6.65  | -0.14 | 0.04   |
| benzylthiocyanate                                                                                                            | Secondary Metabolite Degradation  | Compounds                                                          | 0.26   | -0.09  | 0.03  | 18.36  |
| pseudoionone                                                                                                                 | Secondary Metabolite Degradation  | Methylketones                                                      | 0.26   | -0.09  | 0.03  | 18.78  |
| 2-benzylthiohydroximate-O-sulfate                                                                                            | Secondary Metabolite Degradation  | THIOHYDROXIMATE-O-SULFATES                                         | 0.26   | 18.21  | 0.03  | 21.06  |
| 7'-hydroxyabscisate                                                                                                          | Secondary Metabolite Degradation  | Absciscic-Acid-Derivative                                          | 0.26   | 23.89  | 0.03  | 22.81  |
| primeverose                                                                                                                  | Secondary Metabolite Degradation  | Disaccharides                                                      | -7.33  | 14.64  | -7.65 | 14.66  |
| (glutathion-S-yl)-4-methoxy-3-indolylmethylisothiocyanate                                                                    | Secondary Metabolite Degradation  | Indole-Phytoalexins<br>// S-Substituted-Glutathione                | -18.52 | -1.03  | 0.82  | 0.74   |
