# Supplementary material for: Metabolomics and Physiological Insights into the Ability of Exogenously Applied Chlorogenic Acid and Hesperidin to Modulate Salt Stress in Lettuce Distinctively
Source: Molecules. 2021 Oct 18;26(20):6291. doi: 10.3390/molecules26206291 (PMC8537907; doi:10.3390/molecules26206291)
Supplement: Supplementary file 1 [file molecules-26-06291-s001.zip]

Archive with 5 entries (5 files):
- Supplementary Figure.pdf
- Table S1.xlsx
- Table S2.pdf
- Table S3.pdf
- Table S4.pdf
