# Supplementary material for: Metabolomics and Physiological Insights into the Ability of Exogenously Applied Chlorogenic Acid and Hesperidin to Modulate Salt Stress in Lettuce Distinctively
Source: Molecules. 2021 Oct 18;26(20):6291. doi: 10.3390/molecules26206291 (PMC8537907; doi:10.3390/molecules26206291)
Supplement: Supplementary file 1 [file molecules-26-06291-s001.zip › Table S1.xlsx]

## Sheet: Dataset
		0 mM NaCl												40 mM NaCl
		Chlorogenic acid			Control			Hesperidin			Chlorogenic acid + Hesperidin			Chlorogenic acid			Salt control			Hesperidin			Chlorogenic acid + Hesperidin
Compound	Name compounds	Sample-LA_3-r001	Sample-LA_3-r002	Sample-LA_3-r003	Sample-LA_1-r001	Sample-LA_1-r002	Sample-LA_1-r003	Sample-LA_2-r001	Sample-LA_2-r002	Sample-LA_2-r003	Sample-LA_4-r001	Sample-LA_4-r002	Sample-LA_4-r003	Sample-LA_7-r001	Sample-LA_7-r002	Sample-LA_7-r003	Sample-LA_5-r001	Sample-LA_5-r002	Sample-LA_5-r003	Sample-LA_6-r001	Sample-LA_6-r002	Sample-LA_6-r003	Sample-LA_8-r001	Sample-LA_8-r002	Sample-LA_8-r003	CompositeSpectrum
CPD-10276	2-hydroxy-2-methylbutyronitrile	2076533	1	1733568	1	1	1	2180419	2250343	2249410	1876247	2348185	2326389	3054669	3562945	2796039	1	1	1	1552246	1625239	1	5333125	5341306	4986273	(100.074875, 25370.045)(101.077934, 1581.21)(102.101265, 736.4283)(122.83119, 12454.382)(123.0647, 118.94)(107.05647, 213.2625)
CPD-12699	(2R)-2-hydroxy-2-methylbutanenitrile	2076533	1	1733568	1	1	1	2180419	2250343	2249410	1876247	2348185	2326389	3054669	3562945	2796039	1	1	1	1552246	1625239	1	5333125	5341306	4986273	(100.074875, 25370.045)(101.077934, 1581.21)(102.101265, 736.4283)(122.83119, 12454.382)(123.0647, 118.94)(107.05647, 213.2625)
CPD-7620	1-heptanal	1077284	1057311	1015393	806869	976322	1360764	559060	244569	213445	900705	809299	869936	892314	768672	1	1603270	1474304	1765217	1149591	1349034	1196664	858484	877430	789408	(100.1113, 139.83)(117.1377, 282.96)(137.09517, 27683.285)(138.09776, 1689.9529)(119.08494, 10729.609)
CPD-303	cyclohexylamine	1346801	1161091	1193445	1271586	1276790	1217987	857922	830291	874599	1	1	706038	1402760	1428203	1481179	1661593	1400631	1422954	875416	920024	875659	1260997	1226408	1279900	(100.11144, 41124.29)(101.11451, 1579.3977)(125.10626, 2355.2185)
CPD-11526	3-oxo-2-(cis-2'-pentenyl)-cyclopentane-1-(E-buta-2-enoyl)-CoA	193417	492914	200302	190939	462790	417837	355744	377179	351424	169552	185735	165427	442080	193390	137779	146899	377937	458250	187135	368657	221431	1	1	1	(1000.8236, 5801.862)(1001.8225, 3117.1917)(1002.5565, 960.17)(983.2653, 6397.3887)(983.2667, 3779.6763)(984.1547, 1543.32)(984.2586, 1156.7)
CPD-12180	feruloylacetyl-CoA	1	1	1	91953	92182	102574	85726	81664	1	95325	161334	95560	231518	202666	216863	1	1	1	134684	147863	140780	193233	177666	181326	(1003.15393, 22397.068)(1004.15497, 9146.662)
CPD-11528	3-oxo-2-(cis-2'-pentenyl)-cyclopentane-1-(3-oxobutanoyl)-CoA	1	1	1	1	139345	154105	112233	1	1	1	1	1	89504	1	1	1	1	1	1	129353	1	1	1	1	(1004.2443, 366.22)(1003.5821, 624.6567)(1003.45056, 776.978)(1004.245, 531.32)
CPDQT-516	CDP-1-18:1(9Z)-2-18:1(9Z)-glycerol	667035	615360	466323	1	122527	99060	675956	647593	672225	682678	528576	258428	1	1	1	255625	461818	502345	1	112351	1	275025	1	240945	(1007.02155, 5481.7)(1008.2725, 4327.875)(1009.2989, 5023.7603)(1010.0647, 10436.4)(1010.5658, 9763.41)(990.67816, 1646.7244)(991.87915, 1117.13)(1009.65295, 2654.826)(1010.74835, 5745.3584)(1011.55286, 4450.725)(990.7682, 6420.4644)(991.8444, 4740.134)(992.8494, 2926.989)(992.55414, 2600.65)(993.556, 367.07)(1025.3864, 1550.906)(1026.5911, 2054.6826)(1027.0881, 3787.875)(1027.5929, 2150.7)(1028.…
CPD-7672	3-(methylsulfanyl)propanoate	8714630	2017682	7212945	1961666	3608505	1517874	2077184	1700631	6898654	813884	4907074	4424258	1108289	1114058	724907	2516763	1629198	5002503	956389	874362	630312	1226899	1012061	3247878	(101.0029, 4151.43)(120.329636, 8103.432)(121.201546, 820.2318)(102.01243, 66122.46)(138.05376, 41151.57)(139.7991, 14408.426)(141.59499, 5257.2793)(142.0491, 1610.25)(121.87333, 2945.8896)(123.57758, 8439.132)(124.03848, 38976.35)(144.00055, 15089.323)(145.00436, 4788.899)(126.99398, 590.9017)
2-OXOBUTANOATE	2-oxobutanoate	563237	659644	550500	634282	666688	563098	592385	484813	582481	648706	467018	1657982	1	208754	779772	878482	703941	699372	769885	1	1	1	975678	247475	(101.02373, 29170.557)(102.02417, 962.39294)(102.889915, 2560.2253)(119.64019, 11676.402)(120.910385, 4474.328)(122.0662, 4871.43)(103.80447, 154084.95)(104.55806, 27650.457)(104.0574, 18737.05)(127.02344, 732132.56)(128.02455, 301691.53)(129.02158, 265795.6)(110.00934, 310.23)
3-KETOBUTYRATE	acetoacetate	563237	659644	550500	634282	666688	563098	592385	484813	582481	648706	467018	1657982	1	208754	779772	878482	703941	699372	769885	1	1	1	975678	247475	(101.02373, 29170.557)(102.02417, 962.39294)(102.889915, 2560.2253)(119.64019, 11676.402)(120.910385, 4474.328)(122.0662, 4871.43)(103.80447, 154084.95)(104.55806, 27650.457)(104.0574, 18737.05)(127.02344, 732132.56)(128.02455, 301691.53)(129.02158, 265795.6)(110.00934, 310.23)
CPD-12177	(<i>R</i>)-methylmalonate-semialdehyde	563237	659644	550500	634282	666688	563098	592385	484813	582481	648706	467018	1657982	1	208754	779772	878482	703941	699372	769885	1	1	1	975678	247475	(101.02373, 29170.557)(102.02417, 962.39294)(102.889915, 2560.2253)(119.64019, 11676.402)(120.910385, 4474.328)(122.0662, 4871.43)(103.80447, 154084.95)(104.55806, 27650.457)(104.0574, 18737.05)(127.02344, 732132.56)(128.02455, 301691.53)(129.02158, 265795.6)(110.00934, 310.23)
SUCC-S-ALD	succinate semialdehyde	563237	659644	550500	634282	666688	563098	592385	484813	582481	648706	467018	1657982	1	208754	779772	878482	703941	699372	769885	1	1	1	975678	247475	(101.02373, 29170.557)(102.02417, 962.39294)(102.889915, 2560.2253)(119.64019, 11676.402)(120.910385, 4474.328)(122.0662, 4871.43)(103.80447, 154084.95)(104.55806, 27650.457)(104.0574, 18737.05)(127.02344, 732132.56)(128.02455, 301691.53)(129.02158, 265795.6)(110.00934, 310.23)
CH3-MALONATE-S-ALD	(<i>S</i>)-methylmalonate-semialdehyde	563237	659644	550500	634282	666688	563098	592385	484813	582481	648706	467018	1657982	1057778	208754	779772	878482	703941	699372	769885	415625	661493	827593	975678	247475	(101.02407, 33414.87)(102.023125, 851.08453)(102.85083, 2607.4587)(107.04346, 59539.547)(119.539314, 12601.572)(120.71234, 3604.2607)(122.0662, 4871.43)(103.91809, 140163.62)(104.70839, 25371.713)(104.0574, 18737.05)(127.02345, 876990.2)(128.02464, 286472.4)(129.02162, 241174.58)(110.00934, 310.23)
TRANS-2-HEXENAL	(E)-2-hexenal	19724352	16505327	16904868	22673052	23664624	1991317	13537587	574429	593633	735642	670695	699899	6788930	754098	6282083	577527	991196	1077991	970220	16288190	977418	2433933	2481818	2424765	(101.078, 4089.9375)(102.09066, 2311.5276)(121.3981, 5833.7095)(122.663574, 2679.5718)(103.05361, 188610.77)(104.05721, 24847.775)
CPD-13222	<i>trans</i>-4-hexen-3-one	19724352	16505327	16904868	22673052	23664624	1	13537587	1	1	1	1	1	6788930	1	6282083	1	1	1	1	16288190	1	2433933	2481818	2424765	(101.078, 4089.9375)(102.09066, 2311.5276)(121.73208, 2823.7473)(125.07325, 10228.73)(103.0537, 361822.1)(104.05719, 32402.87)
CIS-3-HEXENAL	(Z)-3-hexanal	19724352	16505327	16904868	22673052	23664624	1	13537587	1	1	1	1	1	6788930	1	6282083	1	1	1	1	16288190	1	2433933	2481818	2424765	(101.078, 4089.9375)(102.09066, 2311.5276)(121.73208, 2823.7473)(125.07325, 10228.73)(103.0537, 361822.1)(104.05719, 32402.87)
CPD0-1336	3-nitrilo-L-alanine	620273	890928	900341	922606	1077587	899210	762621	815441	564186	949342	881835	894156	900595	328908	837206	205974	843991	1	546091	771056	947589	746494	838128	863826	(101.17493, 35152.625)(102.02705, 1308.2827)(102.32504, 24093.025)(102.53093, 1450.1649)(103.03395, 1552.8401)(118.695526, 11229.78)(120.72943, 2522.9368)(121.39667, 3590.9531)(102.046486, 12894.979)
CPD-4483	3-methyl-4-<i>trans</i>-hydroxy-2-butenal	610995	573000	991686	988214	1	1	1022330	1	345001	1	610289	352081	298187	1	1399634	2883938	1367227	1216955	378122	374937	732209	2807403	4317666	4493247	(101.746445, 1344.5631)(101.05905, 2670.0352)(118.085526, 84656.54)(119.08864, 4661.578)(100.07538, 49818.34)
CPD-4482	3-methyl-4-<i>cis</i>-hydroxy-2-butenal	610995	573000	991686	988214	14257865	3349895	1022330	1	345001	995347	610289	352081	298187	1	1399634	2883938	1367227	1216955	378122	374937	732209	2807403	4317666	4493247	(101.746445, 1344.5631)(102.39568, 1815.0884)(118.08552, 86227.516)(119.08852, 4903.662)(100.07549, 33518.992)
CPD-10255	(9Z,12Z,15Z)-hexadeca-9,12,15-trienoyl-CoA	164088	156120	168192	181045	216469	246256	184454	150344	152149	154532	163630	140421	152872	174570	132595	135065	91761	127768	163597	207442	197399	1	1	1	(1017.2793, 489.71667)(998.28156, 7122.7993)(999.2825, 6633.3164)(1000.281, 6024.8857)(1001.2765, 5087.307)(1002.2781, 1258.4067)
CPD-17621	16-hydroxypalmitoyl-CoA	267883	256135	273764	283768	341654	413777	294951	254825	242471	242598	260445	230568	234499	274288	202455	210883	148386	205332	256901	328982	310547	1	1	80100	(1017.2805, 569.53503)(999.2826, 6715.783)(1000.2812, 6128.2173)
CPD-13228	(<i>E</i>)-2-pentenal	695434	1977693	9526556	1	229366	501091	1748497	1	671664	653067	628321	669344	1	1190042	1	3521660	236147	1	842647	2373332	1	1037429	1063447	758186	(102.090576, 9064.805)(107.046745, 21522.201)(108.0441, 1689.64)
CPD-13218	pent-1-en-3-one	695434	1977693	9526556	1	229366	501091	1748497	1	671664	653067	628321	669344	1	1190042	1	3521660	1	1	842647	2373332	1	1037429	1063447	758186	(102.090576, 9064.805)(107.046776, 21848.854)
PRENAL	3-methyl-2-butenal	695434	1977693	9526556	1	229366	501091	1748497	1	671664	653067	628321	669344	1	1190042	1	3521660	1	1	842647	2373332	1	1037429	1063447	758186	(102.090576, 9064.805)(107.046776, 21848.854)
CPD-7993	N-methylaminobutanal	355811	1	307572	1	1	1	419360	398328	401259	409468	1	1	1	447347	1	422103	1	364933	1	308974	1	511948	1	468562	(102.09058, 12566.054)(130.0941, 210.01)(111.26328, 1085.02)(112.08244, 6997.05)
CPD-10273	(1E,2S)-2-methylbutanal oxime	791387	489815	744846	453775	269190	1015580	1505006	1350910	1360269	1523881	1518552	2143390	4694397	4531516	4788348	1919702	305239	1435765	1820973	919262	515980	3687494	10098209	10580364	(102.09064, 5036.2827)(124.07489, 44039.98)(125.072365, 4837.5874)(106.06445, 3817.8552)(107.06547, 202.932)
BETAINE-ALDEHYDE-HYDRATE	betaine aldehyde hydrate	1	1	1	1	477150	460356	576507	493454	509711	523400	549768	546696	400712	747190	366612	1	1	374661	1	1	386543	996498	813126	972432	(102.09066, 7908.247)(143.8599, 3472.9163)(128.4221, 7115.7534)
BETAINE_ALDEHYDE	betaine aldehyde	355811	1	307572	1	1	1	419360	398328	401259	409468	1	1	392324	447347	366612	422103	1	364933	1	308974	1	511948	813789	468562	(102.09067, 10095.816)(127.5859, 10595.645)(110.79446, 2590.8657)(112.084656, 46250.367)
CPD-10274	(1Z,2S)-2-methylbutanal oxime	1	1	1	453775	269190	1	1	1	1	1	1	1	4694397	4531516	4788348	1	305239	1	1	1	1	3687494	10098209	10580364	(102.09087, 1787.0074)(124.07502, 94704.96)(125.074326, 8473.787)(106.06398, 1697.981)(107.05925, 240.94)
CPD-68	1-aminocyclopropane-1-carboxylate	2992860	2858153	3003231	1687732	2143859	1	1	2870296	2957253	1827980	3572703	3672321	3218693	3282167	1	1	1	1	2681732	2643812	2635295	4027455	4015026	4163709	(102.7748, 59952.207)(103.743576, 37714.258)(104.05694, 5116.927)(104.0575, 9459.057)(106.06473, 4374.3164)(120.972015, 36790.152)(122.47304, 2256.2854)(124.03866, 45672.88)(125.041466, 998.6122)(110.033585, 471.98404)
CPD0-1104	azetidine-2-carboxylate	2992860	2858153	3003231	1687732	2143859	5262219	7727540	2870296	2957253	1827980	3572703	3672321	3218693	3282167	4223277	5176094	3833821	4023100	2681732	2643812	2635295	4027455	4015026	4163709	(102.80252, 48891.418)(103.79304, 32058.523)(104.05694, 5116.927)(102.72158, 5124.1924)(106.06473, 4374.3164)(121.167046, 29284.992)(122.46352, 1883.3838)(123.091095, 4168.6953)(124.038666, 63430.832)(125.04157, 2368.1672)(110.03403, 4710.4966)
OH-MYRISTOYL	UDP-2-N,3-O-bis[(3R)-3-hydroxytetradecanoyl]-&alpha;-D-glucosamine	1	1	1	1	1	1	95120	103110	99872	1	1	1	1	1	1	1	1	1	1	1	1	1	1	71004	(1021.456, 461.0)(1004.4641, 476.77332)(1033.48, 2039.7051)(1016.48895, 1912.8966)(1019.9701, 446.0)(1021.4527, 479.4)(1022.45245, 710.55)(1023.4486, 557.4)
4-HYDROXY-BUTYRATE	4-hydroxybutanoate	1	1	1	1	1	1	1	1	1	1	1	1	1	1	1	1	1	1	1	1	1	260472	272695	236554	(103.03843, 5505.857)(121.07294, 1232.33)(104.0683, 2138.11)(131.0405, 204.15)(113.03104, 8615.22)
CPD-12176	(<i>R</i>)-3-hydroxy-isobutanoate	1	1	1	1	1	1	1	1	1	1	1	1	1	1	1	1	1	1	1	1	1	260472	272695	236554	(103.03843, 5505.857)(121.07294, 1232.33)(104.0683, 2138.11)(131.0405, 204.15)(113.03104, 8615.22)
CPD-12175	(<i>S</i>)-3-hydroxy-isobutanoate	1	1	1	1	1	1	1	1	1	1	1	1	1	1	1	1	1	1	1	1	1	260472	272695	236554	(103.03843, 5505.857)(121.07294, 1232.33)(104.0683, 2138.11)(131.0405, 204.15)(113.03104, 8615.22)
CPD-2483	L-cycloserine	1	25438744	26041772	33520604	37118820	31629000	21836678	18127462	17612674	16949294	17268446	17301748	432053	241439	210941	57786016	47252104	47256052	25730408	1	25086280	3696557	1	1	(103.05313, 6038.6333)(104.35841, 40702.195)(121.38422, 216671.3)(122.08434, 6021.5566)(107.86654, 1506.4521)(108.08017, 553.4533)(127.44098, 20276.42)(128.94516, 4871.2295)(130.38246, 30456.285)(131.04875, 34323.9)(110.33445, 4808.9487)(113.04076, 364.59497)
CIS-3-HEXENOL	(3Z)-hex-3-en-1-ol	1177148	1851267	952227	1168477	922134	1112961	737066	834587	848194	611330	715984	744606	1452816	1454452	1532019	1631030	1248111	1453448	889578	938707	948823	1267974	1135416	1211615	(103.77225, 792758.0)(105.61019, 246365.19)(100.11144, 44298.207)(101.11451, 1784.4445)(126.089645, 366.02426)(105.06909, 4794.3657)
4-METHYLPENTANAL	4-methylpentanal	1177148	1851267	952227	1168477	922134	1112961	737066	834587	848194	611330	715984	744606	1452816	1454452	1532019	1631030	1248111	1453448	889578	938707	948823	1267974	1135416	1211615	(103.77225, 792758.0)(105.61019, 246365.19)(100.11144, 44298.207)(101.11451, 1784.4445)(126.089645, 366.02426)(105.06909, 4794.3657)
CPD-13223	hexan-3-one	1177148	1851267	952227	1168477	922134	1112961	737066	834587	848194	611330	715984	744606	1452816	1454452	1532019	1631030	1248111	1453448	889578	938707	948823	1267974	1135416	1211615	(103.77225, 792758.0)(105.61019, 246365.19)(100.11144, 44298.207)(101.11451, 1784.4445)(126.089645, 366.02426)(105.06909, 4794.3657)
HEXANAL	1-hexanal	1177148	1851267	952227	1168477	922134	1112961	737066	834587	848194	611330	715984	744606	1452816	1454452	1532019	1631030	1248111	1453448	889578	938707	948823	1267974	1135416	1211615	(103.77225, 792758.0)(105.61019, 246365.19)(100.11144, 44298.207)(101.11451, 1784.4445)(126.089645, 366.02426)(105.06909, 4794.3657)
TRANS-2-HEXENOL	(E)-2-hexenol	1177148	1851267	952227	1168477	922134	1112961	737066	834587	848194	611330	715984	744606	1452816	1454452	1532019	1631030	1248111	1453448	889578	938707	948823	1267974	1135416	1211615	(103.77225, 792758.0)(105.61019, 246365.19)(100.11144, 44298.207)(101.11451, 1784.4445)(126.089645, 366.02426)(105.06909, 4794.3657)
CPD-19958	ethyl propanoate	1397349	1939273	1873818	709833	729010	774783	1748497	1	664777	652904	628580	661278	687830	1	685416	408383	173793	834693	810882	735464	1	877673	873682	734519	(104.07117, 358.65665)(107.08481, 10533.249)(108.0866, 567.71)(102.09055, 8821.231)(126.49137, 17948.145)(127.86328, 1445.9641)(107.04577, 19091.164)
CPD-18998	propyl acetate	1	1	1	709833	729010	774783	1	1	1	1	1	1	687830	1	685416	1	1	834693	810882	735464	1	1	1	734519	(104.0715, 437.755)(107.08483, 8640.18)(125.05908, 31073.844)(126.05905, 3209.0898)(107.04437, 13456.201)
CHOLINE	choline	363141056	123028776	183589440	320049664	389479872	323474464	393291648	339026208	186622112	321542336	131935336	318922112	139268496	141547680	277759744	362282144	122297664	163119168	122211336	131974368	128125624	206139616	203623456	206956752	(104.10673, 5736152.5)(105.10986, 289544.16)(106.111534, 10362.229)(129.10165, 822.942)(111.090706, 912.7249)
CPD0-1307	3-methyl-2-butanone	346672832	117102064	177269872	305592352	371148384	307833632	373851328	321926816	177686560	134756160	124866896	307075136	136050464	135190736	264242704	337733280	116414472	155915648	116377064	125868456	121978248	195249648	192796576	196966096	(104.10674, 5805814.5)(105.10986, 293116.6)(106.11156, 10557.44)(110.06797, 771.4425)
CPD-13229	(<i>E</i>)-2-pentenol	346672832	117102064	177269872	305592352	371148384	307833632	373851328	321926816	177686560	134756160	124866896	307075136	136050464	135190736	264242704	337733280	116414472	155915648	116377064	125868456	121978248	195249648	192796576	196966096	(104.10674, 5805814.5)(105.10986, 293116.6)(106.11156, 10557.44)(110.06797, 771.4425)
CPD-13220	1-pentan-3-one	346672832	117102064	177269872	305592352	371148384	307833632	373851328	321926816	177686560	134756160	124866896	307075136	136050464	135190736	264242704	337733280	116414472	155915648	116377064	125868456	121978248	195249648	192796576	196966096	(104.10674, 5805814.5)(105.10986, 293116.6)(106.11156, 10557.44)(110.06797, 771.4425)
CPD-7031	3-methylbutanal	346672832	117102064	177269872	305592352	371148384	307833632	373851328	321926816	177686560	134756160	124866896	307075136	136050464	135190736	264242704	337733280	116414472	155915648	116377064	125868456	121978248	195249648	192796576	196966096	(104.10674, 5805814.5)(105.10986, 293116.6)(106.11156, 10557.44)(110.06797, 771.4425)
CPD-13614	isoprenyl alcohol	346672832	117102064	177269872	305592352	371148384	307833632	373851328	321926816	177686560	134756160	124866896	307075136	136050464	135190736	264242704	337733280	116414472	155915648	116377064	125868456	121978248	195249648	192796576	196966096	(104.10674, 5805814.5)(105.10986, 293116.6)(106.11156, 10557.44)(110.06797, 771.4425)
DIACETYL	diacetyl	542116	500101	459708	365820	397284	157541	676119	536282	530628	601408	586949	608615	2518895	2619175	2642985	446856	1	516325	433866	344871	465408	818360	815817	831408	(104.49821, 1980.1172)(109.02797, 21565.266)(110.03157, 1447.2368)
4-AMINO-BUTYRATE	4-aminobutanoate	1	1689871	1256699	1240143	1476706	1092815	1	2245527	2303604	1	1	2561975	1	2656028	1	1	1	1	1	766533	1033832	4861301	4887455	4744492	(104.56825, 21057.303)(105.685196, 80721.125)(106.47066, 15498.275)(105.57355, 355.49878)(123.95873, 2806.066)(126.05426, 44805.96)(108.0437, 36219.24)(109.04642, 1672.3574)
CPD-6141	N-methyl-&beta;-alanine	1	1689871	1256699	1240143	1476706	1092815	1	2245527	2303604	1	1	2561975	1	2656028	1	1	1	1	1	766533	1033832	4861301	4887455	4744492	(104.56825, 21057.303)(105.685196, 80721.125)(106.47066, 15498.275)(105.57355, 355.49878)(123.95873, 2806.066)(126.05426, 44805.96)(108.0437, 36219.24)(109.04642, 1672.3574)
CPD0-1942	(S)-2-aminobutanoate	1	1689871	1256699	1240143	1476706	1092815	1	2245527	2303604	1	1	2561975	1	2656028	1	1	1	1	1	766533	1033832	4861301	4887455	4744492	(104.56825, 21057.303)(105.685196, 80721.125)(106.47066, 15498.275)(105.57355, 355.49878)(123.95873, 2806.066)(126.05426, 44805.96)(108.0437, 36219.24)(109.04642, 1672.3574)
CPD-466	(S)-3-amino-2-methylpropanoate	1	1689871	1256699	1240143	1476706	1092815	1	2245527	2303604	1	1	2561975	1	2656028	1	1	1	1	1	766533	1033832	4861301	4887455	4744492	(104.56825, 21057.303)(105.685196, 80721.125)(106.47066, 15498.275)(105.57355, 355.49878)(123.95873, 2806.066)(126.05426, 44805.96)(108.0437, 36219.24)(109.04642, 1672.3574)
CPD-471	(R)-3-amino-2-methylpropanoate	1	1689871	1256699	1240143	1476706	1092815	1	2245527	2303604	1	1	2561975	1	2656028	1	1	1	1	1	766533	1033832	4861301	4887455	4744492	(104.56825, 21057.303)(105.685196, 80721.125)(106.47066, 15498.275)(105.57355, 355.49878)(123.95873, 2806.066)(126.05426, 44805.96)(108.0437, 36219.24)(109.04642, 1672.3574)
CPD-4748	3-aminobutanoate	1422824	1689871	1256699	1240143	1476706	1092815	2020615	2245527	2303604	2339447	1890368	2561975	405622	2656028	1	795913	1	771718	977151	766533	1033832	4861301	4887455	4744492	(104.704704, 20179.201)(106.069534, 52815.656)(106.641655, 11441.234)(106.07482, 694.97)(122.52904, 2833.0493)(126.05423, 33101.24)(108.04368, 37640.555)(109.046455, 1664.0419)
ISOVALERATE	isovalerate	1	1	1	128427	143959	1	1	1	573970	1	1	1	279077	290480	1	180120	113682	116014	1	1	1	1	1	1	(105.0704, 472.55)(126.55703, 76622.72)(128.39568, 6018.862)(129.0653, 4945.57)(108.04382, 68393.72)(109.299774, 9268.72)
CPD-16015	2-iminopropanoate	1	1	441642	756520	1	929969	1	1	1	1	488649	708495	1	1	1	819731	1167236	763045	575068	565012	898366	2942901	3023168	3120850	(105.56806, 14415.356)(106.432465, 938.08276)(111.82656, 4044.1558)
CPD-11520	3-oxo-2-(cis-2'-pentenyl)-cyclopentane-1-(3-oxooctanoyl)-CoA	587089	153329	123183	126690	143555	141217	478253	114309	116564	89293	514499	88537	113275	118327	94683	595309	459595	88006	101394	132287	157831	346003	1	298256	(1054.2861, 8392.403)(1055.2872, 8668.648)(1056.2858, 8278.294)(1057.2855, 4382.9204)(1058.2849, 1614.1866)(1072.3002, 7250.0117)(1073.3009, 7633.198)(1074.2997, 7459.479)(1075.2996, 4140.328)(1076.2982, 1507.1931)(1077.2845, 423.46)(1054.289, 6481.57)(1055.2892, 6467.78)(1056.288, 6620.6)(1057.2876, 3344.97)(1058.2863, 639.55)(1077.2804, 395.42)
CPD-16560	delphinidin 3-<i>O</i>-rutinoside-7-<i>O</i>-(6-<i>O</i>-(4-<i>O</i>-(glucosyl)-oxybenzoyl)-glucoside)	915479	854859	953644	696489	688365	1	735200	723167	689865	820569	794616	1	727741	692214	694645	902412	716751	798274	696314	690776	679710	1	528148	483168	(1054.2877, 7981.9673)(1055.2883, 8447.913)(1055.289, 8230.18)(1056.2881, 8345.61)(1057.288, 4367.93)(1058.2869, 1861.19)(1054.2906, 8165.12)(1055.2915, 8027.57)
CPD-11519	3-oxo-2-(cis-2'-pentenyl)-cyclopentane-1-(3R-hydroxyoctanoyl)-CoA	832455	784882	866000	626031	628442	617315	629663	659285	614081	733111	714424	674657	658976	640897	618566	1	643183	722806	644517	644131	646811	508937	474133	425477	(1055.2877, 7794.764)(1056.2883, 7881.96)(1057.2882, 4125.27)(1058.287, 1757.79)(1056.2876, 8048.3936)(1057.287, 4224.964)(1058.2867, 1437.3734)(1055.2887, 8454.584)
CPD-14425	(2E,7Z,10Z,13Z,16Z,19Z)-docosahexaenoyl-CoA	454989	435042	479417	345398	1	345809	328826	1	344126	1	399813	345295	368239	1	1	1	338887	404364	358272	358369	361056	283301	1	234315	(1055.2886, 8486.341)(1056.2881, 8345.61)(1057.288, 4367.93)(1058.2869, 1861.19)(1056.2876, 8225.442)(1057.2871, 4328.047)(1058.2866, 1509.1418)
CPD-11518	3-oxo-2-(cis-2'-pentenyl)-cyclopentane-1-(E-octa-2-enoyl)-CoA	1	1	1	1	1	1	1	1	1	1	1	1	1	1	1	1	1	1	1	1	285756	1	1	1	(1055.2891, 7772.95)(1056.2883, 7881.96)(1057.2882, 4125.27)(1058.287, 1757.79)
CPD-17624	&omega;-carboxy-(9<i>Z</i>)-octadec-9-enoyl-CoA	580973	535588	613332	428171	428149	446710	402410	1	435552	1	510712	466812	457349	1	1	591572	432609	522032	468519	454372	470431	354626	1	275329	(1056.2845, 9297.414)(1057.284, 4988.0386)(1058.2834, 1803.85)(1056.2897, 8247.58)(1057.2892, 4268.311)(1058.289, 1426.2528)
CPD-17627	10,16-dihydroxypalmitoyl-CoA	275652	250264	293204	201741	204806	209784	211273	216469	205737	254705	238109	229284	216392	213705	196447	275777	217580	244177	218352	215352	219173	171800	155355	134540	(1056.2875, 8471.065)(1057.2869, 4458.906)(1058.2866, 1515.7633)
CPD-14407	dihomo &gamma;-linolenoyl-CoA	269285	250264	1	201741	204806	209784	191826	1	205737	1	1	212508	216392	1	1	265598	198764	244177	218352	215352	219173	171800	1	134540	(1056.2878, 8417.011)(1057.2875, 4386.592)(1058.2872, 1485.0605)
CPD-12647	(11Z,14Z,17Z)-icosatrienoyl-CoA	269285	250264	1	201741	204806	209784	191826	1	205737	1	1	212508	216392	1	1	265598	198764	244177	218352	215352	219173	171800	1	134540	(1056.2878, 8417.011)(1057.2875, 4386.592)(1058.2872, 1485.0605)
CPD-17348	(2E,11Z,14Z)-icosatrienoyl-CoA	269285	250264	1	201741	204806	209784	191826	1	205737	1	1	212508	216392	1	1	265598	198764	244177	218352	215352	219173	171800	1	134540	(1056.2878, 8417.011)(1057.2875, 4386.592)(1058.2872, 1485.0605)
CPD-5542	4-vinylpyridine	527819	470350	523232	161765	119528	145945	530755	479637	446147	603446	295667	590369	219021	319843	688405	325603	1	1	199660	193773	175254	785882	721581	748384	(106.0614, 7335.47)(106.201904, 8902.515)(107.06801, 343.00998)(126.91204, 2954.875)(131.28387, 4512.5386)(132.309, 10619.259)(131.05756, 175.70999)
CPD-10275	(2S)-methylbutanenitrile	506351	441765	433532	1	1	1	268856	258870	430889	561194	444054	574860	322608	321348	1	1	1	1	1	1	1	1	1	1	(106.06484, 12838.366)(107.0697, 293.68362)
2-AMINOACRYLATE	2-aminoprop-2-enoate	1	1	1	1	1	1	1	1	1	1	1	1	1	1	1	1	1	1	1	1	1	2942901	3023168	3120850	(106.06887, 8442.177)(113.029, 6464.4263)
4-AMINO-BUTYRALDEHYDE	4-aminobutanal	1	1	1	1	1	1	1	1	1	1	1	1	1	1	1	612660	1	1	1	1	1	1547496	1498081	1	(106.111534, 14047.4375)(112.39983, 18205.193)
CPD-16599	avenacin A-2	121045	130989	105091	75748	150149	119171	122231	113492	110097	168090	157386	162970	133762	94951	85662	1	80650	93456	1	1	1	139629	117589	121623	(1066.5312, 2094.3174)(1048.5143, 8807.191)(1049.5164, 5877.898)(1050.5156, 3067.0598)(1051.5153, 388.48)(1064.5432, 3434.397)(1065.5519, 684.5616)(1092.5398, 3558.1296)(1093.5422, 2097.339)(1094.541, 793.30994)(1071.4849, 363.22)
CPD-17641	18-hydroxystearoyl-CoA	1	1	1	1	1	1	1	1	1	1	1	1	1	1	1	1	1	1	80421	81592	1	1	1	1	(1068.3423, 3005.4102)(1069.342, 3139.33)
CPD-15368	3-oxo-lesqueroloyl-CoA	1	1	1	1	1	1	1	1	1	1	1	1	1	1	1	1	1	1	80421	81592	1	1	1	1	(1068.3423, 3005.4102)(1069.342, 3139.33)(1070.3413, 3497.4248)(1071.3403, 829.005)
CPD-17402	(3R)-hydroxy-auricoloyl-CoA	1	1	1	1	1	1	1	1	1	1	1	1	1	1	1	1	1	1	80421	81592	1	1	1	1	(1068.3423, 3005.4102)(1069.342, 3139.33)(1070.3413, 3497.4248)(1071.3403, 829.005)
CPD-14419	(3R,11Z,14Z,17Z)-3-hydroxyicosatrienoyl-CoA	82436	82848	1	1	88737	78078	69219	1	1	1	1	1	86638	94628	107716	1	1	106807	118664	1	107438	71649	72882	80444	(1068.3428, 2320.695)(1069.3433, 2337.0425)(1070.3418, 2191.6326)(1068.3419, 2275.6992)(1069.3427, 2617.8413)(1070.3417, 2753.7517)(1071.3407, 559.7867)
CPD-17403	(2E,11Z,17Z)-14R-hydroxy-icosa-11,17-trienoyl-CoA	82436	82848	1	1	88737	78078	69219	1	1	1	1	1	86638	94628	107716	1	1	106807	118664	1	107438	71649	72882	80444	(1068.3428, 2320.695)(1069.3433, 2337.0425)(1070.3418, 2191.6326)(1068.3419, 2275.6992)(1069.3427, 2617.8413)(1070.3417, 2753.7517)(1071.3407, 559.7867)
CPD-17346	(11Z,14Z)-3-oxoicosadienoyl-CoA	82436	82848	1	1	88737	78078	69219	1	1	1	1	1	86638	94628	107716	1	1	106807	118664	1	107438	71649	72882	80444	(1068.3428, 2320.695)(1069.3433, 2337.0425)(1070.3418, 2191.6326)(1068.3419, 2275.6992)(1069.3427, 2617.8413)(1070.3417, 2753.7517)(1071.3407, 559.7867)
CPD-14405	(3R)-hydroxydihomo &gamma;-linolenoyl-CoA	82436	82848	213201	214344	88737	78078	69219	201392	192261	159668	1	164633	86638	94628	107716	1	140520	106807	118664	220191	107438	71649	72882	80444	(1069.1343, 3245.1323)(1070.135, 3299.284)(1070.3418, 2191.6326)(1068.3419, 2275.6992)(1069.3427, 2617.8413)(1070.3417, 2753.7517)(1071.3407, 559.7867)(1072.299, 6270.68)(1073.2999, 6694.298)
CPD-15369	3R-hydroxy-lesqueroloyl-CoA	1	1	1	1	1	1	1	1	1	1	1	87924	1	1	1	1	1	1	103275	93569	86802	1	1	1	(1069.3418, 3119.0725)(1070.3408, 2817.425)(1071.3411, 596.475)(1070.3413, 3360.435)(1071.3403, 800.47)
CPD-15370	trans-lesqueroloyl-CoA	1	128588	1	1	1	1	133101	1	1	135449	143413	1	139408	1	1	1	1	1	196018	175811	168369	100861	1	112723	(1069.3422, 2553.516)(1070.3402, 2871.562)(1071.341, 397.15)(1070.3423, 2851.4644)(1071.3403, 800.47)
CPD-14300	(11Z)-3-oxoicosa-11-enoyl-CoA	1	128588	1	1	1	1	133101	1	1	135449	143413	1	139408	1	1	1	1	1	196018	175811	168369	100861	1	112723	(1069.3422, 2553.516)(1070.3402, 2871.562)(1071.341, 397.15)(1070.3423, 2851.4644)(1071.3403, 800.47)
CPD-17347	(3R,11Z,14Z)-3-hydroxyicosadienoyl-CoA	1	128588	1	1	1	1	133101	1	1	135449	143413	1	139408	1	1	1	1	1	196018	175811	168369	100861	1	112723	(1069.3422, 2553.516)(1070.3402, 2871.562)(1071.341, 397.15)(1070.3423, 2851.4644)(1071.3403, 800.47)
CPD-15367	auricoloyl-CoA	173437	128588	169405	174719	168062	183290	133101	147741	155464	135449	143413	128685	139408	143868	137228	116611	100375	117585	196018	175811	168369	100861	1	112723	(1069.3422, 2553.516)(1070.3402, 2871.562)(1071.341, 397.15)(1070.3423, 2851.4644)(1071.3403, 800.47)(1074.2997, 6917.131)(1075.2997, 3829.0442)(1076.2983, 1294.3593)(1077.2845, 393.22)
D-SERINE	D-serine	1212577	1	487506	1	1	1	337664	241602	546667	333207	497730	344740	241345	929872	605077	1	1	1	571219	1	1	1051345	839678	1089319	(107.04531, 13426.781)(110.05938, 39673.742)(111.061295, 1995.0695)(123.179016, 1303.928)(105.63953, 13441.954)(113.027756, 99.94)
BENZALDEHYDE	benzaldehyde	525437	663938	1294295	225201	1196353	255932	1110154	1119196	1065527	983078	1	1603241	4768742	4388829	4572684	5228923	4255240	2407546	215479	1	290760	2342143	7925762	8161444	(107.04581, 15215.373)(108.445946, 22256.965)(109.048004, 5381.66)(108.97884, 17458.342)(108.0474, 8739.91)(124.07497, 54900.88)(125.07363, 8447.919)(106.429756, 4971.9307)(109.0749, 4839.6)(133.49751, 655.55817)(111.62073, 2482.207)(115.0374, 5598.97)
SER	L-serine	1212577	713644	487506	1024829	1	1	337664	241602	546667	333207	497730	344740	241345	929872	605077	1331889	739050	1097310	571219	1	1	1051345	839678	1089319	(107.046, 22444.926)(108.848755, 3409.1538)(109.0499, 782.53)(110.05961, 33780.566)(111.06125, 1877.795)(123.179016, 1303.928)(105.48932, 15628.351)(106.066284, 1670.268)(128.0342, 144.68)(111.22459, 470.41006)
B-ALANINE	&beta;-alanine	1	1	1	253302	223461	133765	1	1	1	1	1	1	856215	825217	892439	1	1	1	278478	1	221449	2267347	2281142	2259008	(107.08457, 5593.1973)(108.080414, 390.38168)(112.03926, 41462.125)(113.041245, 2444.914)
D-ALANINE	D-alanine	1	1	1	253302	223461	133765	1	1	1	1	1	1	856215	825217	892439	1	1	1	278478	1	221449	2267347	2281142	2259008	(107.08457, 5593.1973)(108.080414, 390.38168)(112.03926, 41462.125)(113.041245, 2444.914)
L-ALPHA-ALANINE	L-alanine	1	1	1	253302	223461	133765	1	1	1	1	1	1	856215	825217	892439	1	1	1	278478	1	221449	2267347	2281142	2259008	(107.08457, 5593.1973)(108.080414, 390.38168)(112.03926, 41462.125)(113.041245, 2444.914)
SARCOSINE	sarcosine	489170	486829	478813	253302	223461	133765	1	1	1	957941	545610	529684	856215	825217	892439	529271	535599	1	278478	1	221449	2267347	2281142	2259008	(107.08458, 10999.422)(108.08209, 424.69574)(112.03926, 41462.125)(113.041245, 2444.914)
CPD-13606	(Z)-butanethial S-oxide	1658131	19419962	1	23395372	32026912	23478728	24185328	20470300	19411344	23355700	21558156	21463608	1	22226800	22374516	26546384	2475850	18461058	1317019	1364582	1313250	17960996	20391214	675551	(107.93884, 6754.369)(109.03595, 803.245)(122.230736, 6851.998)(106.60193, 1740.9822)(107.16207, 843.42554)(108.0522, 718.36)(128.13512, 282886.03)(130.01764, 6342.85)(110.00824, 336090.56)(112.00584, 56024.902)(113.008, 8427.856)
CPD-14423	(5Z,8Z,11Z,14Z,17Z)-3-oxodocosapentaenoyl-CoA	231437	237536	213201	214344	226406	231177	223353	201392	192261	159668	164214	164633	196888	193794	166520	151441	140520	158840	183244	220191	253597	112192	122362	111371	(1072.3003, 6409.845)(1073.3011, 6770.315)(1074.2998, 6542.9473)(1075.2997, 3637.7205)(1076.2981, 1373.4445)(1077.2825, 380.2)
CPD-14406	(2E,8Z,11Z,14Z)-icosatetraenoyl-CoA	231437	237536	213201	214344	226406	231177	223353	1	192261	159668	1	164633	1	193794	166520	1	140520	158840	1	1	253597	112192	122362	1	(1072.3005, 6635.1636)(1073.3014, 6787.134)
CPD-14420	(2E,11Z,14Z,17Z)-icosatetraenoyl-CoA	231437	237536	213201	214344	226406	231177	223353	1	192261	159668	1	164633	1	193794	166520	1	140520	158840	1	1	253597	112192	122362	1	(1072.3005, 6635.1636)(1073.3014, 6787.134)
CPD-12649	juniperonoyl-CoA	231437	237536	213201	214344	226406	231177	223353	1	192261	159668	1	164633	1	193794	166520	1	140520	158840	1	1	253597	112192	122362	1	(1072.3005, 6635.1636)(1073.3014, 6787.134)
CPD-14394	(8Z,11Z,14Z,17Z)-icosatetraenoyl-CoA	231437	237536	213201	214344	226406	231177	223353	1	192261	159668	1	164633	1	193794	166520	1	140520	158840	1	1	253597	112192	122362	1	(1072.3005, 6635.1636)(1073.3014, 6787.134)
CPD-14424	(3R,5Z,8Z,11Z,14Z,17Z)-3-hydroxydocosapentaenoyl-CoA	292144	305983	278622	283453	281680	299991	284868	254499	255160	208694	212525	215590	260378	237455	219804	198800	171106	200225	246965	275967	320820	135682	153969	148524	(1073.3011, 6834.694)(1074.2996, 5819.314)(1075.2987, 3276.596)(1076.2982, 1242.1567)(1074.2998, 6812.9336)(1075.2998, 3775.8923)(1076.2981, 1350.2256)(1077.2825, 380.2)
CPD-12648	sciadonoyl-CoA	269285	250264	169405	201741	204806	209784	191826	147741	205737	127327	123406	212508	216392	1	1	265598	198764	244177	218352	215352	219173	171800	1	134540	(1074.2982, 6788.057)(1075.2979, 3556.795)(1076.2952, 1111.8175)(1056.2878, 8417.011)(1057.2875, 4386.592)(1058.2872, 1485.0605)
CPD-14426	(7Z,10Z,13Z,16Z,19Z)-docosapentaenoyl-CoA	175829	165420	120642	89454	170552	101445	163597	109278	132158	1	1	81345	140383	1	1	1	71406	119600	103843	96274	107385	1	1	1	(1075.2993, 4414.984)(1076.298, 1589.1167)(1077.2825, 427.08502)(1057.289, 5251.346)(1058.2883, 2055.8157)
2-HYDROXY-2-METHYLPROPANENITRILE	2-hydroxy-2-methylpropanenitrile	1	1183522	1564001	998292	1177794	860880	1	1389978	1	1	1	1562154	457615	1	1	1	1	1	1	1038561	928085	1	1	1326787	(108.04368, 38057.375)(109.04695, 1914.5962)
CPD-19607	2-pyrrolidone	1436441	1183522	1564001	998292	1177794	860880	1788718	1389978	1706934	2140832	1713322	1562154	457615	997902	731430	1	1	1	774143	1038561	928085	1433474	1153826	1326787	(108.04368, 44533.305)(109.04678, 1915.2798)
CARBOXYMETHOXYLAMINE	carboxymethoxylamine	149964	119221	128839	153933	209486	161345	150777	134228	111156	137372	120554	127753	141898	219115	128441	153405	117099	115932	139264	140534	142008	110138	124683	111782	(108.55444, 21209.084)(111.058754, 8987.6045)(113.00805, 8516.374)
PHENYLHYDRAZINE	phenylhydrazine	1261273	955153	835356	1026417	934019	1	989946	943202	138935	876625	965872	961279	1017110	734638	765116	1180969	903021	948230	915060	923619	896896	1005425	1043865	707269	(108.61437, 1712.9468)(109.07496, 9406.801)(128.01884, 6826.292)(131.05905, 96.565)
CPD-16624	des-methyl avenacin A-1	1	1	1	1	1	1	1	1	1	1	359447	1	1	1	1	1	1	1	127821	122631	130467	1	1	1	(1080.5188, 734.18)(1083.5483, 2192.89)(1084.5488, 1047.66)(1061.5396, 6690.15)(1062.5446, 4143.99)(1103.5511, 1418.74)(1079.5614, 3685.47)(1080.5631, 564.07666)(1102.5433, 1389.87)
GLYCERATE	(<i>R</i>)-glycerate	136752	107497	96540	163188	186272	150307	229765	198059	180983	125261	108810	102025	183481	187394	1179319	1	1	1	101983	1	99092	437822	426227	399236	(109.028015, 30156.938)(110.032394, 1596.9851)(110.03503, 1310.1934)(123.05229, 7778.496)(108.19751, 9198.239)(107.04646, 14688.533)(131.0166, 390.43002)
CPD-13605	(<i>E</i>)-1-butenesulfenate	1658131	1	1	1	1	1	1	1	1	1	1	1	1	1	1	1	2475850	1	1317019	1364582	1313250	1	1	675551	(109.02804, 16119.612)(122.230736, 6851.998)(108.88245, 3710.8835)(129.0186, 818.245)(110.00865, 123.395)
CPD0-1951	3-mercapto-1,2-propanediol	5219388	3835221	3969075	3784329	4065637	3443151	9970990	10374156	1	1	2094677	4848852	5976653	4935321	1404597	1080115	482688	864938	2256282	2209291	2160012	8057581	7572574	1	(109.02829, 30007.195)(110.022446, 761.7)(110.03347, 6812.3545)(113.033356, 5694.3447)(126.99927, 51013.473)(127.701515, 2882.7092)(128.65352, 1751.418)(108.95331, 7376.3335)(111.545746, 16344.823)(112.0476, 9383.94)
CPD-9273	allylsulfenate	1343648	1276109	1271056	1764098	1	511239	1470412	986899	1363821	1550977	1397964	1630824	1294652	2062994	1189169	615327	1	1	916780	1	1453151	1187784	722422	830819	(109.24729, 3720.6653)(111.14453, 7786.7954)(112.047455, 14911.243)
CPD-9304	(<i>E</i>) 1-propenylsulfenate	1343648	1276109	1271056	1	1	511239	1470412	986899	1363821	1550977	1397964	1630824	1294652	2062994	1189169	615327	1	1	916780	1	1	1187784	722422	830819	(109.26927, 3203.1067)(111.1557, 8378.442)(112.047455, 14911.243)
CPD-9305	(<i>Z</i>)-propanethial <i>S</i>-oxide	1343648	1276109	1271056	1	1	511239	1470412	986899	1363821	1550977	1397964	1630824	1294652	2062994	1189169	615327	1	1	916780	1	1	1187784	722422	830819	(109.26927, 3203.1067)(111.1557, 8378.442)(112.047455, 14911.243)
CPD-10678	avenacin A-1	74675	1	68908	1	1	1	71244	1	1	116922	1	125809	1	1	1	1	1	1	1	1	1	1	1	1	(1093.5413, 2961.0342)(1094.5408, 850.458)
CPD0-1038	thiourea dioxide	1	1	1	624265	2240079	1	1	1	1	1151914	1	625105	1	1	1	1507639	1	1	1196209	1243006	623751	1026511	257992	1066185	(110.00809, 58965.965)(112.00615, 6416.3125)(128.03598, 1049.3125)(131.0347, 240.61)(134.98586, 18659.057)(112.97713, 14936.681)
CPD-7673	3-sulfanylpropanoate	105427	105313	97724	83053	226732	137101	199460	1	1	130453	92434	101603	97767	108701	89360	140006	83199	1	109735	117239	126844	1	73508	1	(110.00819, 374952.5)(111.00935, 61529.46)(124.03835, 8287.523)(125.032166, 691.3867)(127.0357, 3372.48)(113.188156, 7507.4746)(114.98277, 8551.395)
BUTYRIC_ACID	butanoate	794871	1	1	1	1	1	1	1	1	1	1	1	1	1	1	751522	612670	623267	1	1	1	1	1	1	(110.034325, 19113.234)(111.0419, 1066.73)
ISOBUTYRATE	isobutanoate	794871	1	1	1	1	1	1	1	1	1	1	1	1	1	1	751522	612670	623267	1	1	1	1	1	1	(110.034325, 19113.234)(111.0419, 1066.73)
2-METHYLPROPANAL-OXIME	(<i>E</i>)-2-methylpropanal-oxime	652286	1	1	1	1	1	1	1	1451509	1118362	1	1	1412592	1463645	1452194	1	1	1	1	1	1	722748	916796	992653	(110.059364, 56125.297)(111.061554, 3298.2478)
CPD-11435	N-isopropylformamide	652286	1	1	1	1	1	1	1	1451509	1118362	1	1	1412592	1463645	1452194	1	1	1	1	1	1	722748	916796	992653	(110.059364, 56125.297)(111.061554, 3298.2478)
CPD-4861	(Z)-2-methylpropanal-oxime	652286	3040303	3075175	3830196	4102564	3395045	771056	694001	1451509	1118362	1	810369	1412592	1463645	1452194	1662339	1414029	1465587	3151652	3682121	3508616	722748	916796	992653	(110.05941, 56462.03)(111.0608, 2862.2197)
BENZYL-ALCOHOL	benzyl alcohol	1249137	1177584	988717	1214476	1655048	1527149	1044968	1028523	1022793	953046	933042	947292	3295389	998621	1	738611	3480595	3427964	2455915	775235	754300	1	1259164	1232135	(110.05972, 96897.15)(111.06199, 24181.979)(109.208145, 6944.7476)(129.10155, 3161.925)(108.07991, 3072.9504)(131.95998, 12687.657)(133.1455, 509636.7)(136.0615, 1231032.5)(113.03391, 28179.469)
CATECHOL	catechol	613899	1	1	659255	903165	676367	11625853	9478206	1395795	1	7867714	1	1446756	11520435	12600287	2638262	1211683	1	746830	1	684586	21137472	849139	20431838	(110.481026, 5800.719)(113.0432, 569.7)(111.32323, 6967.0894)(114.71688, 13940.562)(129.85223, 7397.077)(129.06494, 974.9575)(110.05952, 114106.984)(111.06112, 1651.9)(136.20888, 17930.203)(118.84524, 46437.06)(119.028, 19096.41)
2-FUROATE	2-furoate	1	668613	667475	859901	1188580	923301	1	1	1	1	1	1	1	1	1	888347	684087	644763	852469	882049	864256	1	1	1	(111.00939, 60989.01)(115.020004, 6668.59)(130.0475, 5484.537)(131.04356, 17731.73)(113.39883, 1977.1167)(115.03787, 6036.5273)(118.992195, 2772.1956)
CYTOSINE	cytosine	334946	509817	305057	655423	1654079	679164	12101486	10406792	10656986	536703	10399573	539370	589282	3201588	259943	9863693	352121	315359	8981381	9305764	505723	1901904	331823	149413	(111.04359, 6914.0923)(112.0465, 219.73)(112.04995, 128963.586)(113.05202, 4787.048)(114.0534, 251.09999)(130.48082, 1294.302)(131.0845, 6224.5327)(116.069756, 52321.574)(119.02797, 11296.175)(121.0289, 339.24)
CPD0-1682	dioxane	1	1	1	327761	1	347652	377510	1	340836	1	1	1	1	1	1	1	1	310501	287626	1	1	1	1	1	(111.04386, 12702.434)(112.046906, 211.65668)
CPD-19751	2-formylpyridine	1349308	1292178	1024493	1082885	1115830	861654	1469221	1181348	1628217	1550977	1	1592086	2467305	2760827	1	719397	603706	555245	935530	980928	940805	2030669	1612189	2203585	(111.09009, 6125.0093)(112.048515, 17410.463)(108.043945, 35831.97)(109.047585, 2351.075)(126.300804, 2827.988)(130.08524, 6609.9985)(110.87124, 6455.8125)(110.0679, 1036.2)(132.53366, 359.275)(112.0178, 3173.4897)
ENOL-OXALOACETATE	enol-oxaloacetate	3169630	2574079	2564907	1495879	1	1249159	1	2438257	2553530	2503654	1815472	1	1	1	1	3235918	2595578	788275	1502509	2533710	1400325	1	1	1	(111.98207, 14704.748)(132.60367, 146.51599)(116.99361, 684.8485)(148.02496, 16707.488)(134.35406, 1264.954)(154.9882, 13941.64)
CPD-9467	oleanolate-3-beta-D-glucuronoside-(3,1)-galactoside-(4,1)-glucoside-28-glucoside	1	1	1	1	1	1	1	1	1	1	542104	1	103079	1	1	1	1	1	90813	123539	126110	1	1	1	(1117.5093, 2053.8052)(1101.5372, 7232.3066)(1102.5406, 2548.1934)(1103.5409, 1441.55)(1101.5398, 5521.295)(1102.544, 1327.505)
DIHYDROXYPIRIDIN-CPD	3,4-dihydroxypyridin	1	1	1	1	1	1	1	1	1	1	1	1	800355	1	796721	1	1	1	1	1	1	1866959	2139213	2220928	(112.03932, 62365.133)(113.041245, 3011.6719)(113.66061, 3143.3699)(116.069275, 11225.415)
CPD-28	N-methylmaleimide	1	1	1	1	1	1	1	1	1	1	1	1	800355	1	796721	1	1	1	1	1	1	1866959	2139213	2220928	(112.03932, 62365.133)(113.041245, 3011.6719)(113.66061, 3143.3699)(116.069275, 11225.415)
3-HYDROXY-4H-PYRID-4-ONE	3-hydroxy-4h-pyrid-4-one	1	252929	220822	264298	1	224999	1	236661	248181	287218	426130	292214	800355	1	796721	468886	211800	404524	264728	310593	257913	1866959	2139213	2220928	(112.03932, 62365.133)(113.041245, 3011.6719)(129.06828, 6923.037)(130.07043, 406.42645)(115.31572, 7104.639)(116.069115, 10573.115)(139.0366, 71.14)
DELTA1-PYRROLINE_2-CARBOXYLATE	1-pyrroline-2-carboxylate	3692385	2955796	2931660	3621642	1	3364129	166865	252257	2890639	150835	149214	181637	651952	682301	781346	4006292	3278989	3385503	3429161	3302361	3327175	1908512	2014597	2293609	(112.039604, 51294.125)(113.041245, 3111.5698)(114.916084, 6342.938)(115.55312, 2560.4175)(100.048035, 282.895)(132.08029, 7424.204)(135.08348, 2157.5776)(116.06967, 56906.266)(117.0734, 8812.45)(136.30577, 27990.057)(139.32567, 7223.0317)(140.0379, 710.5)(117.0196, 576.66)
CPD-17445	dimethyl thiosulfinate	8711867	6934239	7179457	4094386	12694867	4101129	3188722	990357	2859327	754414	2087905	2579387	8391231	8215039	1	2934302	1528811	2006091	1039877	2554651	2539145	7362795	1806891	8235545	(112.09979, 1298.2977)(112.9834, 397.55)(114.12815, 5762.566)(128.36977, 96624.4)(129.3044, 721.5164)(110.008934, 140587.05)(111.018, 22.27)(132.97194, 602.406)(114.96493, 6283.8525)(115.96291, 286.05066)
CPD-1831	acetylenedicarboxylate	631853	532193	564267	725776	1032670	794181	750855	575493	562367	558079	599299	705376	654627	632443	684944	739233	612730	512627	647282	691511	757475	518631	728728	666249	(112.31622, 5010.7305)(116.9941, 8235.054)(116.79338, 7220.1953)(117.9959, 440.58)(133.14407, 1029.0693)(112.00585, 56982.848)(113.008156, 8376.301)
GLYCEROL	glycerol	186686	259940	153976	223678	269887	396492	188006	208959	221236	288536	251436	291169	234264	149904	177080	163941	229489	255158	202424	331158	277622	243649	244560	229049	(112.335205, 202793.69)(113.80473, 31497.244)(114.09183, 3296.6282)(115.03863, 8835.686)
CPD-385	1,2-benzoquinone	1822413	3107812	3314276	3295864	3106911	2831211	2354495	3105224	7863416	9746876	1	1	6393736	1	2281669	1	1728322	1	1	3188741	2156243	1	8141984	8229896	(112.832664, 15368.355)(113.0336, 4804.51)(109.02838, 4548.072)(126.05469, 81243.56)(127.05712, 7695.47)(128.05714, 846.0625)(108.04393, 48893.055)(109.0484, 12336.76)
CPD-12005	dimethyl selenide	2014178	2238183	2406571	2243505	2124445	2082617	1	2141611	2170413	2430728	2329428	1802872	1	1	1	3229500	1	1835314	2439311	2484203	1	2291437	2331479	1	(112.9688, 520.08)(112.57225, 1476.8274)(116.99345, 675.526)(132.71104, 1449.1335)(134.95067, 379.84937)(135.8401, 332.4591)(136.023, 373.21)(130.78484, 6233.7656)(138.39111, 4332.944)
CPD-14447	(2Z)-2-hydroxypenta-2,4-dienoate	1	1	1	90823	142263	87170	87298	68711	1	83155	1	1	357360	370047	359895	488009	268353	307248	77686	81628	122233	90979	1	80886	(113.02527, 3148.9963)(116.18257, 7794.165)(117.039215, 6480.417)(118.0418, 425.95)(100.03055, 72991.75)(132.52542, 3164.5386)(115.05013, 2682.825)
CPD-14441	(3E)-2-oxopent-3-enoate	1	1	1	90823	142263	87170	87298	68711	1	83155	1	1	357360	370047	359895	488009	268353	307248	77686	81628	122233	90979	1	80886	(113.02527, 3148.9963)(116.18257, 7794.165)(117.039215, 6480.417)(118.0418, 425.95)(100.03055, 72991.75)(132.52542, 3164.5386)(115.05013, 2682.825)
OXOPENTENOATE	2-oxopent-4-enoate	1	1	1	90823	142263	87170	87298	68711	1	83155	1	1	357360	370047	359895	488009	268353	307248	77686	81628	122233	90979	1	80886	(113.02527, 3148.9963)(116.18257, 7794.165)(117.039215, 6480.417)(118.0418, 425.95)(100.03055, 72991.75)(132.52542, 3164.5386)(115.05013, 2682.825)
CPD-6761	(2E)-2-hydroxypenta-2,4-dienoate	1	1	1	90823	142263	87170	87298	68711	1	83155	1	1	357360	370047	359895	488009	268353	307248	77686	81628	122233	90979	1	80886	(113.02527, 3148.9963)(116.18257, 7794.165)(117.039215, 6480.417)(118.0418, 425.95)(100.03055, 72991.75)(132.52542, 3164.5386)(115.05013, 2682.825)
URACIL	uracil	6279579	7009568	7377668	1445922	1744864	1401981	1486322	13780739	13998259	13709713	13577933	1154283	3554739	3538108	279250	8511382	6641104	6666287	7394475	7269722	1135454	2493647	355867	372816	(113.03428, 20526.846)(130.66351, 5491.512)(131.06355, 454.33002)(112.04993, 146295.77)(113.608406, 997.2811)
BUTANEDIOL	(R,R)-2,3-butanediol	1	1	1	1	1	1	1	1	1	1	1	1	1	1	1	1	1	1	1	1	1	1	583883	1	(113.0588, 5649.8)(114.0544, 710.72)
CPD-603	3-cyano-L-alanine	957346	840635	1	848248	1050873	1631641	1351102	1124048	1082455	1675305	994279	966256	214583	324794	2085299	1	1	619801	736118	1472337	1414399	2315825	2273407	336615	(113.12924, 31067.342)(114.0369, 582.57)(115.0451, 120.6)(132.47086, 10720.068)(115.92891, 3529.5786)(118.06474, 17376.135)(138.2283, 2552.5234)(139.92351, 7239.769)(140.0339, 2623.5)(121.45226, 1728.2644)
L-DELTA1-PYRROLINE_5-CARBOXYLATE	(<i>S</i>)-1-pyrroline-5-carboxylate	1	541139	498308	1	1	1	166865	433004	446003	150835	149214	181637	651952	682301	781346	1	1	1	691590	1	783080	1908512	2014597	2293609	(113.43055, 33186.758)(113.041245, 3111.5698)(115.05292, 11386.283)(117.0568, 266.4)(131.70665, 7016.972)(133.58202, 1227.8175)(116.8758, 22165.0)(137.61021, 3508.5527)(139.22464, 5734.269)(140.0465, 886.1019)(118.74102, 11407.609)(123.0413, 325.45502)
CPD-7965	gentiodelphin	275712	235054	280642	201002	207091	212177	217030	235816	204108	261364	242655	228742	244032	214759	206448	281337	218264	251554	236115	213430	216006	221877	219375	194823	(1130.3077, 8624.498)(1131.3075, 4944.9478)(1132.3062, 2013.325)(1133.3037, 417.26)
FUM	fumarate	1576715	1343277	1265776	1	1651897	1413089	1	1261716	1244180	1335742	1202191	1289834	1227893	1191754	1176010	1137535	1341907	1116291	1221228	1305430	1242780	1202646	1	1152939	(115.00531, 12313.871)(116.01526, 344.8217)(137.03801, 25295.746)(114.1588, 2500.2805)(137.99033, 86.545006)
MALEATE	maleate	1576715	1343277	1265776	1	1651897	1413089	1	1261716	1244180	1335742	1202191	1289834	1227893	1191754	1176010	1137535	1341907	1116291	1221228	1305430	1242780	1202646	1	1152939	(115.00531, 12313.871)(116.01526, 344.8217)(137.03801, 25295.746)(114.1588, 2500.2805)(137.99033, 86.545006)
CPD-13061	L-<i>threo</i>-tetruronate	1452069	1656601	1603468	1517708	1667861	1580144	1482430	1425969	1489266	1586433	1473569	1568308	1493091	1437265	1475266	2174032	1593922	1413355	1568163	1669597	1515473	1473616	1537825	1474058	(115.00533, 12988.648)(116.01534, 334.58542)(157.00389, 10777.833)(159.84842, 73.98)(120.5226, 296.11)(153.05434, 496.63254)(135.02182, 1284.7615)(136.02403, 328.84274)(138.02751, 336.91763)(139.03142, 125.101105)(141.74808, 143942.64)(137.0498, 62.95)
CPD-15579	sulfamate	174128	1	1	1	1	1	1	112579	1	163513	1	79384	1	1	1	1	1	1	1	1	1	1	1	1	(115.006905, 4752.8076)(122.96307, 6062.1475)(100.9561, 408.79)
2-KETO-ISOVALERATE	3-methyl-2-oxobutanoate	1279921	1093461	1135383	1734424	1864456	1660959	1679773	1432896	1487116	1	1351267	1433577	1534657	2804701	2813739	830317	1033416	1031319	1185241	1273239	1278698	2294759	2202269	404648	(115.03863, 7467.1963)(119.8902, 208.10167)(102.04634, 14459.801)(133.07397, 14010.332)(134.0872, 163.56)(117.46928, 2010.0814)(119.07082, 10777.921)(120.0719, 134.78)(139.94745, 6192.5674)(140.03395, 3881.44)(121.1293, 1925.6589)(122.023865, 282.71335)
CPD-280	glutarate semialdehyde	1279921	1093461	1135383	1734424	1864456	1660959	1679773	1432896	1487116	1	1351267	1433577	1534657	2804701	2813739	830317	1033416	1031319	1185241	1273239	1278698	2294759	2202269	404648	(115.03863, 7467.1963)(119.8902, 208.10167)(102.04634, 14459.801)(133.07397, 14010.332)(134.0872, 163.56)(117.46928, 2010.0814)(119.07082, 10777.921)(120.0719, 134.78)(139.94745, 6192.5674)(140.03395, 3881.44)(121.1293, 1925.6589)(122.023865, 282.71335)
CPD-3618	2-oxovalerate	1279921	1093461	1135383	1734424	1864456	1660959	1679773	1432896	1487116	1	1351267	1433577	1534657	2804701	2813739	830317	1033416	1031319	1185241	1273239	1278698	2294759	2202269	404648	(115.03863, 7467.1963)(119.8902, 208.10167)(102.04634, 14459.801)(133.07397, 14010.332)(134.0872, 163.56)(117.46928, 2010.0814)(119.07082, 10777.921)(120.0719, 134.78)(139.94745, 6192.5674)(140.03395, 3881.44)(121.1293, 1925.6589)(122.023865, 282.71335)
l-delta1-pyrroline_5-carboxylate nullnullnull 10.012 :23	#N/A	1	1	1	1	1	1	1	1	1	1	1	573936	1	1	1	1	1	1	1	1	1	1	1	1	(115.053, 11927.64)(118.0647, 761.85)(131.0843, 14496.53)(132.0804, 1379.68)(118.085, 23073.77)(137.0433, 1387.44)(139.0472, 2170.2)(140.0486, 691.58)(119.0277, 12502.33)
l-delta1-pyrroline_5-carboxylate nullnullnull 10.012 :19	#N/A	1	1	1	1	1	1	1	1	1	1	506083	1	1	1	1	1	1	1	1	1	1	1	1	1	(115.0532, 14156.11)(118.0648, 993.56)(131.0842, 16117.93)(132.0807, 1099.7)(118.085, 22834.03)(137.0427, 2093.41)(140.0483, 633.02)(119.0277, 10617.46)
l-delta1-pyrroline_5-carboxylate nullnullnull 10.012 :20	#N/A	1	1	1	1	1	1	1	1	1	1	1	1	399840	1	1	1	1	1	1	1	1	1	1	1	(115.0533, 8910.27)(118.0652, 900.5)(131.0845, 8433.47)(132.0807, 394.0)(118.0852, 19128.78)(137.0415, 113.71)(139.0473, 2219.68)(140.0496, 522.62)(119.0279, 13124.6)
CPD-19547	<i>N</i>-propargylglycine	1	541139	498308	1	1	1	1	433004	446003	474304	506083	573936	399840	1	1	1	1	1	691590	1	783080	285581	219830	150011	(115.053314, 11359.631)(118.065155, 723.97)(131.08455, 12473.92)(132.08067, 604.3875)(118.08532, 24810.57)(137.26538, 1447.5322)(139.38129, 2051.1548)(140.0488, 822.36835)(119.027916, 12912.637)(123.0413, 325.45502)
CPD0-1103	3,4-dehydroproline	1	541139	498308	214282	234144	214230	1	433004	446003	474304	506083	573936	399840	296081	255025	366275	287966	267563	691590	1	783080	285581	219830	150011	(115.05333, 13446.298)(117.05628, 3131.985)(100.0522, 141.56)(117.765015, 15074.995)(118.06533, 14946.544)(100.0528, 417.2)(131.0844, 10394.817)(132.08078, 563.45776)(118.08525, 24809.941)(137.84242, 1879.062)(139.58119, 2181.6726)(140.04886, 846.71)(119.027985, 14485.006)(123.041725, 253.66002)
l-delta1-pyrroline_5-carboxylate nullnullnull 10.012	#N/A	1	1	1	1	1	1	1	1	1	474304	1	1	1	1	1	1	1	1	1	1	1	1	1	1	(115.0534, 14052.75)(118.0659, 239.97)(131.0845, 16804.47)(132.0813, 769.49)(118.0853, 25024.18)(137.0433, 1522.77)(140.049, 760.7)(119.0281, 10093.01)
l-delta1-pyrroline_5-carboxylate	(<i>S</i>)-1-pyrroline-5-carboxylate	1	1	1	1	1	1	1	1	1	1	1	1	1	1	1	1	1	1	1	1	1	1	219830	1	(115.0534, 9484.99)(131.0846, 7840.98)(118.0854, 19367.71)(119.028, 13747.69)
l-delta1-pyrroline_5-carboxylate nullnullnull 10.012 :27	#N/A	1	1	1	1	1	1	1	1	1	1	1	1	1	1	1	1	1	1	1	1	1	1	1	150011	(115.0535, 7914.68)(131.0848, 5496.66)(118.0855, 19047.48)(139.0483, 2700.92)(140.0484, 161.05)(119.028, 15166.66)
l-delta1-pyrroline_5-carboxylate nullnullnull 10.012 :12	#N/A	1	1	1	1	1	1	1	1	1	1	1	1	1	1	1	1	1	1	1	1	1	285581	1	1	(115.0535, 8859.8)(131.0848, 6708.85)(118.0856, 21011.35)(119.0281, 13335.94)
CPD0-2038	fluorofumarate	235076	162068	190565	226606	378129	281163	263293	191497	182223	225100	201916	202552	279982	519515	322450	305613	218657	214853	246499	272730	271396	289557	260129	296725	(116.99393, 7352.453)(117.99541, 309.56)(135.01166, 1731.7391)(152.03474, 8104.566)(153.0387, 604.82)(138.58798, 2528.6013)(160.81847, 1605.541)(160.99918, 1853.2776)(139.98593, 4765.079)(141.68942, 1366.9456)(141.99138, 2273.9983)
PHENYLACETALDOXIME	(<i>Z</i>)-phenylacetaldehyde oxime	1	1	1	1	1	1	1	1	1	1	1	1	1	1	1	1	1	1	1	1	1	3357253	1	3364451	(117.05605, 258.08002)(136.07489, 157023.75)(137.07236, 6842.705)(118.065155, 7631.2)(137.0946, 388.27)(161.06256, 7688.73)(163.07474, 1524.8)(142.04944, 503.78497)
CPD-13031	(<i>E</i>)-phenylacetaldehyde oxime	1	1	1	1	1	1	1	1	1	1	1	1	1	1	1	1	1	1	1	1	1	3357253	1	3364451	(117.05605, 258.08002)(136.07489, 157023.75)(137.07236, 6842.705)(118.065155, 7631.2)(137.0946, 388.27)(161.06256, 7688.73)(163.07474, 1524.8)(142.04944, 503.78497)
CPD-238	2-phenylacetamide	1	1	1	1	1	1	1	1	1	1	1	1	1	1	1	1	1	1	1	1	1	3357253	1	3364451	(117.05605, 258.08002)(136.07489, 157023.75)(137.07236, 6842.705)(118.065155, 7631.2)(137.0946, 388.27)(161.06256, 7688.73)(163.07474, 1524.8)(142.04944, 503.78497)
CPD-14642	3-hydroxy-3-methylbutanoate	1	1956009	1	2125351	1433139	1	1306921	788299	969004	1	1	1	1	886635	787673	2011065	1814061	1	1411270	1	1557410	777846	364359	516374	(117.056694, 8983.623)(102.71961, 203885.45)(103.75621, 115168.45)(104.05737, 26812.781)(118.06514, 18885.13)(119.06128, 918.14825)(100.052345, 807.112)(135.0915, 6701.513)(121.19885, 10896.348)(122.08975, 1918.485)(141.78194, 14166.054)(143.72023, 134.52333)(124.038704, 44408.508)(125.18446, 3540.7805)(127.04713, 93250.68)
PHENYLACETONITRILE	phenylacetonitrile	501842	3532818	719321	5395765	4225976	2106567	313864	289452	302385	1874206	3250999	1386684	3490036	2631330	519178	9146520	8382556	2372747	3699982	2701526	3598186	962092	183862	1491051	(117.05706, 10765.727)(118.0649, 48623.0)(119.06313, 6184.2812)(120.0584, 275.15)(135.84305, 4196.9365)(141.45049, 4050.6047)(143.05621, 2564.8967)
INDOLE	indole	1	3532818	719321	5395765	4225976	1	1	1	1	1	1	1386684	1	1	519178	9146520	8382556	1	3699982	1	3598186	962092	1	1491051	(117.05765, 15145.114)(118.06486, 82345.66)(119.06549, 10748.243)(135.59229, 1133.7075)(140.9592, 3061.549)(142.05316, 3172.58)
DI-H-URACIL	5,6-dihydrouracil	20044414	1305383	1424272	922787	1918274	2491753	1037643	1100714	585244	650852	2872631	3342797	451375	660921	615543	3030589	2798166	2673147	1490159	991756	1441339	311131	777009	284134	(117.38422, 785.9334)(117.055786, 19143.94)(102.048096, 347.405)(132.08029, 27255.715)(133.07962, 1274.6333)(116.069664, 32048.412)(117.06985, 1837.5492)(140.03847, 2540.341)(120.10274, 10092.42)(121.02638, 1819.6375)
S2O3	thiosulfate	1	386190	490634	1	1	381516	1	1	185682	1	1	1	1	1	1	304292	1	1	202460	1	1	1	526504	846723	(117.93427, 740.8243)(118.078354, 389.50143)(118.9423, 163.48)(112.9568, 12081.11)
CPD-13346	butyl acetate	368943	189776	180383	844749	162970	334307	565071	529375	523924	161011	146674	531469	691691	658922	158094	237402	695338	630737	159520	127543	173595	748254	682874	627948	(118.08543, 28538.03)(121.10005, 7474.9575)(136.11896, 827.17)(139.07341, 5881.7593)(140.06789, 426.41284)(141.0683, 284.97)(121.06422, 7124.2617)(122.06106, 1189.184)
HYDROXYMALONATE	2-hydroxymalonate	1	1208461	1	1064295	1	1	1	1043521	1213903	1	1	1120950	1	1288002	1	1820516	1	1326349	1221173	1	1276667	1	1	1242370	(118.992256, 372.50546)(136.02406, 333.96817)(121.02285, 208.14499)
METHYLNICOTINATE	trigonelline	1237715	931511	896508	1117376	1223074	1144375	397059	6810453	7340984	1	826117	836725	10776060	1159841	1172615	1158615	1	808699	785291	852067	810226	1	470524	1603813	(119.03495, 10886.28)(120.041695, 741.4634)(138.05411, 82758.31)(139.0569, 6780.619)(158.56702, 3182.7214)(160.09586, 1619.8455)(141.2493, 11183.292)(160.03523, 935.44995)(143.03343, 3771.077)
CPD-10204	norfuraneol	326868	290577	238657	455842	621812	529579	426006	363344	381936	294014	414304	396983	115016	294561	267267	805974	691862	260458	449394	477335	467084	189591	447350	206474	(119.04613, 6287.6743)(115.038635, 6453.6685)(133.38489, 13777.74)(135.97145, 70959.516)(136.0714, 111142.94)(116.185265, 5779.569)(118.44047, 9953.287)(119.067024, 1899.6324)(137.02385, 6299.799)(120.0111, 229.19)
L-ASPARTATE-SEMIALDEHYDE	L-aspartate 4-semialdehyde	1	454951	409259	505556	1	453005	814502	205224	229637	301896	487985	312680	1080512	1	1053105	375656	556142	1	430841	429283	1	1	483467	452452	(119.04867, 10737.159)(103.03912, 179.57999)(121.59248, 3986.0984)(122.5629, 2821.095)(102.04628, 9548.857)(136.19283, 6638.666)(117.45677, 6294.644)(118.528366, 1107.6447)(121.07415, 870.755)(142.15282, 7555.2446)(144.04486, 387.40002)(126.26466, 16111.361)
CPD-15779	2-(2-methylpyridin-3-yl)ethanol	108161952	93669736	98810096	125667352	149469600	115631152	89455376	67595040	66678424	65182044	64878864	65023448	41305168	37735800	38628192	206381792	174373120	167181600	93857904	93433608	95772576	18841268	18553100	18804770	(119.07117, 16311.362)(160.19707, 5184.2876)(162.75041, 9455.964)(163.0851, 10579.54)(120.08024, 2570779.0)(121.08243, 214664.98)(122.08534, 8155.1006)(158.87798, 7687.0503)(138.09052, 38017.71)(139.09122, 7827.2397)(144.23267, 33370.434)(145.91919, 2417.333)(146.0711, 285.04)(137.10619, 9663.1875)
PRO	L-proline	6151761	7864903	3337830	2370638	1911538	1394169	11102737	1804982	4808167	1	6008417	3148069	3399839	1211287	3278604	4596328	4927185	4649530	2101992	577017	3104242	1	6305848	5112894	(119.238014, 2585.6934)(116.069824, 76065.78)(117.072495, 3822.1838)(118.06496, 2048.95)(135.3506, 5011.6123)(137.10612, 8450.653)(138.05426, 97062.63)(139.05368, 6896.2124)(120.04024, 912.1682)
CPD-19411	(2S)-2-amino-4-pentenoate	6151761	7864903	3337830	2370638	1911538	1394169	11102737	1804982	4808167	1	6008417	3148069	3399839	1211287	3278604	4596328	4927185	4649530	2101992	577017	3104242	1	6305848	5112894	(119.238014, 2585.6934)(116.069824, 76065.78)(117.072495, 3822.1838)(118.06496, 2048.95)(135.3506, 5011.6123)(137.10612, 8450.653)(138.05426, 97062.63)(139.05368, 6896.2124)(120.04024, 912.1682)
HOMO-SER	L-homoserine	2580544	1641041	3954153	2654214	1199782	1454207	14504396	4849420	2304090	4149320	4245926	4315368	5637463	10872254	8128875	4495360	3942789	3612609	1279381	1922512	810249	7779544	1617817	1587022	(119.69225, 6308.2856)(121.06137, 4242.87)(102.862236, 60990.535)(103.83403, 45689.65)(104.057, 7548.09)(122.59258, 35199.027)(103.3901, 4353.405)(106.06485, 3956.5298)(140.00638, 6824.7363)(141.10132, 1082.5156)(121.258575, 37508.113)(122.24214, 2175.7986)(123.09116, 2097.9734)(142.0493, 14097.477)(143.0516, 170.76999)(124.038765, 65901.91)(125.04098, 6788.765)
CPD-470	L-2,4-diaminobutanoate	225130	229096	227989	559868	627749	663300	1	1	1	199825	361981	291064	240715	201795	240447	1027226	959267	1082766	307422	266473	289999	124300	107263	100884	(119.76948, 8988.081)(120.085, 480.06)(121.426735, 232.87334)(122.0954, 1591.97)(120.33943, 2908.6077)(143.07288, 4533.474)(144.63498, 28901.979)(145.54904, 5962.9673)(146.24622, 1140.8467)(128.40102, 1358.6882)(129.0684, 89.14)
DIMETHYLSULFONIOACETATE	thetin	8940948	6563711	6093309	6569954	5778289	6390659	5595691	4418575	5954996	5920373	4165456	6383538	4445313	5731232	1	8523169	6261970	6325157	6155587	5885193	6191062	4681099	1	4552398	(120.02595, 11041.773)(121.02574, 1070.8688)(102.012375, 80815.48)(121.25314, 1717.5138)(139.23956, 512.2659)(140.23685, 1651.9083)(141.05455, 543.4941)(122.09204, 220.54904)(123.04883, 3589.167)(130.00621, 50500.023)
ADT	ADT	258433	314120	306084	247374	261502	299104	1	143570	149788	1	147643	173888	205059	206723	1	313254	1	415176	230154	248068	156352	1	332909	159050	(120.04405, 2749.4756)(119.05925, 5931.8267)(135.07953, 7250.565)(143.03618, 7029.196)
CPD-10303	D-allothreonine	1	1	1	1	1	1	14504396	4849420	1	1	1	1	1	1	1	4495360	3942789	3612609	1	1	1	7779544	1	1587022	(120.06112, 13924.716)(121.05925, 3497.505)(102.652, 6901.7017)(103.55544, 34431.418)(104.0569, 1517.21)(120.780846, 45663.773)(102.85586, 2952.3838)(140.09767, 7449.4565)(141.1016, 482.21002)(121.65808, 11072.322)(122.5901, 3086.88)(123.0912, 593.75)(142.04924, 11075.655)(124.038994, 112357.37)(125.04189, 8069.646)
CPD-12643	1-hydroxycumene	1062000	437147	1	493592	1376633	1343384	598477	635007	663280	959680	598549	392152	1	320894	1	554934	1	1187782	1	1	513108	189205	183601	156368	(120.0813, 5579.64)(159.6447, 2379.7905)(160.07304, 143.77)(119.085, 12671.566)(120.08055, 673.38995)(154.12143, 280.5725)(137.09521, 8287.107)(138.0982, 601.6)(141.73773, 4041.3506)(142.44044, 367.1991)(136.11557, 1956.855)
MALONATE	malonate	1124210	930310	880963	924527	1	254041	1026015	905873	877907	915847	845559	884637	854388	820967	853448	1123172	887515	849418	874129	896340	885967	853891	899558	832841	(120.11328, 9470.403)(121.34292, 2434.6816)(102.02031, 110.170006)(125.98515, 23781.672)(127.99233, 710.9533)
D-THREONINE	D-threonine	1	1	1	1	1	1	14504396	4849420	1	1	1	1	1	1	1	4495360	3942789	3612609	1	1	1	1	1	1587022	(120.31135, 15760.8)(121.05925, 3497.505)(102.80323, 8373.975)(103.722755, 39237.715)(120.733376, 52440.938)(102.85586, 2952.3838)(140.49902, 697.82196)(141.1018, 542.0)(122.08701, 12911.376)(122.0888, 2605.78)(123.0912, 593.75)(142.04915, 9822.108)(124.038994, 125087.52)(125.04189, 8069.646)
THR	L-threonine	1	1	1	1	1	1	14504396	4849420	1	1	1	1	1	1	1	4495360	3942789	3612609	1	1	1	1	1	1587022	(120.31135, 15760.8)(121.05925, 3497.505)(102.80323, 8373.975)(103.722755, 39237.715)(120.733376, 52440.938)(102.85586, 2952.3838)(140.49902, 697.82196)(141.1018, 542.0)(122.08701, 12911.376)(122.0888, 2605.78)(123.0912, 593.75)(142.04915, 9822.108)(124.038994, 125087.52)(125.04189, 8069.646)
CPD0-1507	O-methylserine	1	1	1	1	1	1	14504396	4849420	1	1	1	1	1	1	1	4495360	3942789	3612609	1	1	1	1	1	1587022	(120.31135, 15760.8)(121.05925, 3497.505)(102.80323, 8373.975)(103.722755, 39237.715)(120.733376, 52440.938)(102.85586, 2952.3838)(140.49902, 697.82196)(141.1018, 542.0)(122.08701, 12911.376)(122.0888, 2605.78)(123.0912, 593.75)(142.04915, 9822.108)(124.038994, 125087.52)(125.04189, 8069.646)
SUC	succinate	144156	1	1	136107	1	1	1	1	1	1	1	1	1	1	1	243065	165904	191902	118191	127600	131486	401665	345848	380141	(121.02467, 2333.6475)(102.01277, 2397.07)(134.04517, 4785.7705)(120.04193, 2879.9084)(139.00179, 5736.2563)
CPD-19606	2-keto-4-hydroxybutyrolactone	144156	1	1	136107	1	1	1	1	1	1	1	1	1	1	1	243065	165904	191902	118191	127600	131486	401665	345848	380141	(121.02467, 2333.6475)(102.01277, 2397.07)(134.04517, 4785.7705)(120.04193, 2879.9084)(139.00179, 5736.2563)
BENZOATE	benzoate	636119	491884	426871	761517	613760	733309	428425	449028	447310	447854	203932	405069	197457	787959	162803	153340	136848	419448	559564	441343	566955	958230	945983	960297	(121.02655, 2953.8035)(123.91401, 77212.36)(124.90516, 6155.602)(127.049965, 532.37665)(139.98482, 26546.139)(142.78757, 1958.7615)(143.57465, 200.145)(123.72297, 23092.16)(147.02281, 32741.88)(148.02528, 6567.643)(129.3535, 4723.647)
CPD-16173	anthranil	3390101	3297116	3424162	1163200	1	837517	795197	1038062	594541	945723	477191	622497	2522566	2276899	1455005	795304	1357240	2922716	3400413	3554540	3464965	490228	1354872	533196	(121.08582, 16979.057)(122.2973, 1799.3042)(101.025345, 49384.773)(102.02468, 885.7612)(123.050995, 1998.4623)(103.036964, 850.20905)(107.04808, 19534.309)(141.7497, 9302.825)(142.08444, 1608.75)(119.190926, 12657.1455)(120.24215, 2400.7683)(123.0702, 5550.415)(144.42484, 10818.565)(146.31044, 3552.4265)(126.93649, 922939.3)(127.96575, 215144.64)
THREOSE	threose	4439453	4186817	4164790	3440552	3972292	3881663	213232	273125	5033641	5118716	4982091	5110189	482331	497609	570931	3212883	2830266	3274540	3927279	4132353	3945406	595039	431763	250441	(121.33001, 852.52)(107.0447, 25863.41)(123.05385, 6968.9414)(105.37734, 3187.2988)(107.04591, 13403.361)(142.0851, 36029.613)(123.48972, 16466.797)(124.575745, 6060.485)(143.03311, 52397.24)(144.0378, 4423.997)(125.65989, 5345.207)
BENZIMIDAZOLE	benzimidazole	504030	1	1	520792	255149	396558	248465	208768	194503	139441	207992	441881	103167	97034	93924	280908	1	172041	283170	223576	210026	535970	449524	792921	(121.395836, 6424.7095)(123.065, 96.1)(119.059944, 17790.97)(120.0669, 838.22235)(138.09094, 70793.41)(139.09074, 9346.5)(141.10126, 838.91)(141.32541, 13358.239)(145.04895, 90782.75)(146.0569, 13879.555)
D-CYSTEINE	D-cysteine	496306	833901	1598202	333838	173220	291572	817828	623769	330424	852511	922200	1610405	284004	401949	294530	124274	340084	98989	230166	1590444	687500	851177	343186	488538	(121.6896, 1464.34)(124.082924, 2346.1348)(139.55511, 8452.531)(141.21936, 1736.965)(142.96837, 405.8617)(143.0529, 130.73)(122.79165, 28572.361)(123.82391, 4732.262)(126.0462, 589.05)(144.10745, 2160.237)(145.0146, 185.75)(129.20992, 1041.9286)
CYS	L-cysteine	496306	833901	1598202	333838	173220	291572	817828	623769	330424	852511	922200	1610405	284004	401949	294530	124274	340084	98989	230166	1590444	687500	851177	343186	488538	(121.6896, 1464.34)(124.082924, 2346.1348)(139.55511, 8452.531)(141.21936, 1736.965)(142.96837, 405.8617)(143.0529, 130.73)(122.79165, 28572.361)(123.82391, 4732.262)(126.0462, 589.05)(144.10745, 2160.237)(145.0146, 185.75)(129.20992, 1041.9286)
PHENYLACETALDEHYDE	phenylacetaldehyde	130288576	110855904	115092776	150556432	176972368	138269440	103223552	79960880	80154048	76248952	77023720	77750208	46864660	42861820	45666664	247671360	200236032	203801760	110751384	112299200	112731672	20818180	19934844	21493962	(122.021034, 10201.508)(123.46588, 798.77795)(102.046295, 28519.291)(121.32647, 6586.456)(103.053734, 450574.72)(104.05723, 40476.527)(138.09047, 26368.896)(139.09116, 7585.761)(120.08024, 2572710.2)(121.083145, 92289.94)(144.63156, 32296.234)(145.70728, 31605.701)(147.05872, 6455.112)(147.93301, 715.7362)(148.0577, 693.03)(126.61217, 16975.584)(129.42386, 19807.5)(130.0495, 19548.68)
CPD-3344	pyruvic oxime	1	1	1	1	1	1	1	1	1	1	1	1	1	1	352617	1	1	1	1	1	1	1	1	130677	(122.0596, 20218.115)(129.01915, 1077.255)(111.009, 1637.7)
CPD-6995	L-threitol	754729	1	723797	815568	968187	820880	10652459	416463	1	434699	442901	1	11515815	10462673	12403527	994502	1079534	1	775725	777836	770100	1145189	1044885	1120586	(122.05993, 5128.9927)(123.05975, 1063.835)(107.055145, 633.25)(126.57323, 1790.8574)(108.75655, 1211.8569)(144.34932, 10418.755)(124.753075, 703.3667)(145.04904, 72800.34)(147.05302, 3295.2297)(127.093315, 40314.56)(128.03955, 1632.2728)
VAL	L-valine	1113136	995307	1069126	1062567	8152260	13342223	1789523	1167722	1200770	5901959	862566	819511	1614912	1	2872787	1804172	1426901	1314686	1091259	641091	656436	8038819	7540163	5507189	(122.090546, 2306.46)(118.0855, 82268.52)(119.088554, 4769.266)(100.07539, 26219.15)(101.07662, 1516.1149)(139.12183, 2928.502)(140.06946, 26811.742)(141.068, 2309.356)(122.06025, 11017.558)
CPD-6142	N,N-dimethyl-&beta;-alanine	1113136	995307	1069126	1062567	1	1	1789523	1167722	1200770	1	862566	819511	1614912	1	2872787	1804172	1426901	1314686	1091259	641091	656436	8038819	7540163	5507189	(122.090546, 2306.46)(118.08551, 80993.914)(119.08871, 4657.889)(100.0753, 36967.93)(101.07794, 1811.0719)(139.12183, 2928.502)(140.06961, 30004.646)(141.068, 2309.356)(122.06025, 11017.558)
L-2-AMINOPENTANOIC-ACID	L-norvaline	1113136	995307	1069126	1062567	1	1	1789523	1167722	1200770	1	862566	819511	1614912	1	2872787	1804172	1426901	1314686	1091259	641091	656436	8038819	7540163	5507189	(122.090546, 2306.46)(118.08551, 80993.914)(119.08871, 4657.889)(100.0753, 36967.93)(101.07794, 1811.0719)(139.12183, 2928.502)(140.06961, 30004.646)(141.068, 2309.356)(122.06025, 11017.558)
BETAINE	glycine betaine	1113136	995307	1069126	1062567	1	1	1789523	1167722	1200770	1	862566	819511	1614912	1	2872787	1804172	1426901	1314686	1091259	641091	656436	8038819	7540163	5507189	(122.090546, 2306.46)(118.08551, 80993.914)(119.08871, 4657.889)(100.0753, 36967.93)(101.07794, 1811.0719)(139.12183, 2928.502)(140.06961, 30004.646)(141.068, 2309.356)(122.06025, 11017.558)
CPD-3642	D-valine	1113136	995307	1069126	1062567	1	1	1789523	1167722	1200770	1	862566	819511	1614912	1	2872787	1804172	1426901	1314686	1091259	641091	656436	8038819	7540163	5507189	(122.090546, 2306.46)(118.08551, 80993.914)(119.08871, 4657.889)(100.0753, 36967.93)(101.07794, 1811.0719)(139.12183, 2928.502)(140.06961, 30004.646)(141.068, 2309.356)(122.06025, 11017.558)
PHENYLETHYLAMINE	2-phenylethylamine	1014339	968443	964497	5153877	8209975	5167855	1054544	1059850	1067718	1294760	1388349	1447791	1158176	1133800	1038000	2928343	2624348	2657050	1009108	1017911	1008858	925701	949386	941982	(122.09555, 61649.902)(123.0979, 4721.443)(141.1376, 1180.13)(146.50766, 9050.037)(147.59117, 7508.683)(150.0989, 3807.89)
TROPINONE	tropinone	1122730	1049689	1054365	5210425	8324610	5226174	1253294	1429708	1389047	1530010	1479819	1371431	1153053	1132780	1036785	3049949	2707222	2754532	1096026	1106736	1106153	1015513	762083	996999	(122.09556, 60961.168)(123.09788, 4654.6665)(142.12163, 2566.573)(141.1376, 1565.2799)(163.95586, 7276.7573)(165.00093, 6395.076)(146.50702, 9860.556)(147.66273, 6909.112)(150.0989, 3807.89)
CPD-10472	3-dimethylsulfoniopropionaldehyde	3850392	2820933	1647621	395241	2070524	1	596075	2507962	1826288	583982	3517841	3342823	709283	1	1	4243283	1	3243473	2374822	2097632	2217618	1	1	633044	(122.302605, 1460.4425)(102.17851, 14775.983)(103.03844, 80.792)(121.11987, 7305.9854)(102.830864, 176689.5)(106.33213, 12327.166)(107.04737, 18137.193)(138.09048, 8198.591)(139.75206, 4742.1)(142.08522, 15766.508)(120.07999, 1087481.0)(123.07493, 5988.99)(144.74464, 4399.0405)(147.04431, 2667.627)(126.03305, 159.935)
PURINE-RING	purine-ring	4444920	4181137	4329402	3658317	3956561	3894737	5087950	5159702	4986636	4914301	4856960	5020743	7783746	7630588	7564351	3731517	2813802	3274540	3980978	3987816	3755826	4514270	5334513	5315071	(122.545494, 639.11)(123.052635, 3393.4568)(125.05908, 1730.7416)(141.83472, 2174.2285)(142.08511, 4469.62)(143.03307, 89679.69)(144.03754, 5946.116)
PURINE	purine	4444920	4181137	4329402	3658317	3956561	3894737	5087950	5159702	4986636	4914301	4856960	5020743	7783746	7630588	7564351	3731517	2813802	3274540	3980978	3987816	3755826	4514270	5334513	5315071	(122.545494, 639.11)(123.052635, 3393.4568)(125.05908, 1730.7416)(141.83472, 2174.2285)(142.08511, 4469.62)(143.03307, 89679.69)(144.03754, 5946.116)
CPD-578	urea-1-carboxylate	1	1	1	1	1	1	1	1	1	1	1	1	1	1	1	1	1	1	1	1	1	1	141131	133492	(123.05015, 7187.85)(126.0544, 124209.984)(103.03845, 6628.05)
CPD-10471	dimethylsulfoniopropanoate-amine	11031570	3003506	3053805	4447584	3595555	4657123	6599033	2064781	1797726	5541138	5092099	1769841	4303529	4215103	4183882	7166891	6850601	6780792	3200225	3150566	3053921	2659752	2145915	2258604	(123.5098, 3908.0808)(126.090546, 3193.3901)(142.12163, 3496.0198)(144.07991, 125985.44)(145.0816, 13860.679)(146.08057, 925.61554)
SALICYLALDEHYDE	salicylaldehyde	822230	692231	593119	1045943	1382309	989757	569034	389041	353180	769504	461448	123018	6439507	6013798	6290595	1757709	228777	222964	829396	1018671	1027197	4896289	10024374	476504	(123.99348, 24592.693)(124.916855, 2790.8025)(127.0477, 11210.6)(109.0397, 109.705)(124.24873, 27145.943)(127.0573, 7893.15)(108.04375, 35010.035)(109.04686, 1864.1459)(140.069, 30583.457)(141.0688, 2227.7278)(142.06215, 151.835)(122.2036, 8959.877)(148.03618, 341.354)(129.02, 57348.156)(130.0251, 10180.545)
CPD-7024	tropolone	822230	692231	1	1	1	1	1	389041	1	1	1	1	1	1	1	1	1	1	829396	1018671	1027197	1	1	476504	(124.03882, 5417.3994)(124.334, 5957.3687)(108.04375, 19945.809)(109.0469, 217.84)(140.06941, 19879.264)(141.06819, 1871.3002)(142.06215, 151.835)(122.05971, 10551.632)
4-HYDROXYBENZALDEHYDE	4-hydroxybenzaldehyde	822230	692231	1	1	1	1	1	389041	1	1	1	1	1	1	1	1	1	1	829396	1018671	1027197	1	1	476504	(124.03882, 5417.3994)(124.334, 5957.3687)(108.04375, 19945.809)(109.0469, 217.84)(140.06941, 19879.264)(141.06819, 1871.3002)(142.06215, 151.835)(122.05971, 10551.632)
3-OH-BENZALDEHYDE	3-hydroxybenzaldehyde	822230	692231	1	1	1	1	1	389041	1	1	1	1	1	1	1	1	1	1	829396	1018671	1027197	1	1	476504	(124.03882, 5417.3994)(124.334, 5957.3687)(108.04375, 19945.809)(109.0469, 217.84)(140.06941, 19879.264)(141.06819, 1871.3002)(142.06215, 151.835)(122.05971, 10551.632)
CPD-14074	3,6-dihydronicotinate	3852140	3679034	3229890	3232510	4449788	3195469	4993290	4584023	5731888	5103384	4811444	4994868	2188071	1922175	2391596	2418163	2038991	1857428	2697387	2946215	3240692	938256	680124	1119125	(124.03885, 198954.69)(125.042046, 13201.878)(111.04328, 1690.9514)(128.05106, 549.82)(111.92416, 258117.06)(112.05013, 162303.03)(146.2862, 2567.0972)(146.0831, 850.71)(127.73698, 7092.5703)(128.0705, 9391.829)(132.36311, 1934.5665)
CPD-7035	2-phenylethanol	1	1	5798231	28054136	37769640	27730948	5814680	5827565	5783463	6621400	6833337	6754174	5167600	5177518	5205165	17379918	15412323	15379414	5707870	1	5619335	1115017	932120	1004644	(124.07497, 13779.619)(105.06615, 10132.217)(126.090065, 576.5633)(105.06925, 324188.62)(106.06996, 24227.012)(107.07644, 2285.7)(145.119, 236.61)(122.09555, 79280.52)(123.098076, 6325.5347)(147.64223, 7116.1885)(149.87471, 352.528)(129.80966, 3888.6785)(130.0599, 9115.002)
TRIS	tris	170196	169715	254184	347896	165226	127450	402711	299149	296256	154275	285340	327624	865836	604954	841892	454011	178348	209898	197719	220012	164711	1063795	1000496	1076827	(124.54902, 2362.0571)(106.520164, 1870.7095)(123.090744, 3018.1875)(107.08451, 8935.538)(142.12154, 8292.383)(143.1222, 468.81)(146.07411, 4809.8486)(146.93349, 2854.6912)(127.77008, 7224.8237)(129.56653, 1072.1587)(131.0678, 1172.64)
PICOLINATE	picolinate	883521	812319	1	718617	1	1	1	798518	644483	720436	591106	1	734958	731427	1	1053435	804497	582665	439257	813994	751721	430069	577134	602032	(124.65489, 4339.4946)(123.0261, 318.86)(109.0283, 8864.5)(124.96539, 1386.5837)(125.035, 822.47)(109.02914, 5905.387)(140.40909, 13282.067)(123.55032, 6525.857)(147.13309, 171546.86)(148.02509, 12541.525)(149.02296, 2609.1614)(130.01044, 5369.283)
CPD-763	arsenite	1242515	1	1	503806	1	1	1	17723	125262	17801	1	1	1	33364	10548	1004764	1	1	1	1	1	1	1	118959	(124.9219, 530.45)(144.2099, 4712.544)(128.9509, 32401.629)
NIACINAMIDE	nicotinamide	337983	1	267287	1	31997540	25569638	24378454	1	19301488	23581628	22125512	22510652	371345	779928	845178	343936	20062844	1	366480	313029	307894	1616194	1390734	1659366	(125.053795, 40740.203)(126.0537, 8116.8403)(107.57172, 27105.037)(108.0443, 3124.8992)(125.194016, 18074.795)(108.938034, 111489.51)(110.05968, 14663.689)(142.08409, 7986.154)(143.0883, 7151.51)(124.07511, 150954.86)(125.07766, 13037.928)(145.80722, 13284.267)(146.03549, 3622.888)(147.03156, 472.375)(127.02334, 822574.44)(128.77148, 305.39502)
CPD-16172	O-aminobenzaldehyde	1	116311	679624	675323	612149	1	731317	624022	750945	330040	1015565	410103	1075977	3921135	3940429	330502	268033	204832	1	292648	447011	1207770	1183867	660069	(125.05978, 1013.4766)(103.0388, 138.12)(122.06012, 8068.445)(123.068, 46.69)(108.84183, 2022.1844)(109.0644, 363.84)(143.4137, 2569.991)(144.0996, 3397.71)(123.39684, 1250.2274)(126.09053, 925.4643)(144.95207, 12381.508)(147.83145, 353.2367)(148.0561, 29.33)(127.22767, 25910.729)(128.41498, 415.38562)(129.3764, 1118.4275)(131.04897, 565.398)
CPD-9735	2-oxohexa-4,5-cyclopropyl-5-enoate	1	292074	293055	246191	1	1	364348	1	1	1	183604	291288	421666	364834	465170	1	1	197158	1	1	1	573825	499661	685852	(125.274216, 6851.3774)(127.03744, 6107.8193)(113.03345, 25404.94)(145.56706, 63273.246)(148.07214, 10671.93)(129.05386, 10045.65)(130.05981, 3696.8535)(149.0207, 919.895)
CPD-6862	triacetate lactone	176224	292074	293055	246191	1783861	4010779	364348	118546	141503	1065549	183604	291288	421666	364834	465170	5170101	2216086	197158	4028624	4093422	244105	573825	499661	685852	(125.274216, 6851.3774)(128.28908, 7935.412)(113.03333, 17543.775)(145.01968, 35019.504)(147.30124, 6789.6333)(128.80577, 9265.38)(130.05981, 3696.8535)(148.51477, 1403.7775)(130.00603, 48418.26)(131.00124, 220.27333)
CPD-8780	3-fluorobenzaldehyde	31439340	25350750	24757346	26008096	22458732	23650992	22936460	24312440	24415296	24737112	21208646	24212472	914937	776442	1052252	30912112	25242068	24396358	24253944	23867360	24364392	24118912	972885	23717294	(125.837875, 57425.51)(127.84072, 7689.6157)(109.160095, 6336.5054)(125.61111, 645.75146)(109.78977, 5263.264)(111.25596, 13908.574)(145.32243, 1666.517)(146.07681, 3303.0972)(128.07004, 5054.8286)(147.02257, 254811.61)(148.02547, 15530.177)(130.01453, 305.1825)
ORCINOL-CPD	orcinol	502577	327462	386311	1	1961692	388491	4449799	539982	2397748	257285	288335	242963	7317233	7590158	7113877	931447	496632	710177	515456	434708	509131	10222499	659700	10694643	(125.924484, 44474.637)(127.711266, 3477.6147)(128.69128, 2479.5676)(129.06805, 1133.605)(107.098, 15142.894)(108.110954, 16378.421)(109.04825, 4110.9224)(127.52109, 8470.892)(109.11851, 13330.289)(108.0443, 462.92)(142.08534, 63031.64)(143.08803, 5109.9175)(124.07497, 59822.33)(125.07278, 7786.215)(148.39297, 73077.74)(148.88872, 36599.21)(133.0407, 311.92667)
CPD-7682	1-piperideine 6-carboxylate	1805522	1965868	1954344	1330880	3034790	2768769	2775118	2368737	2436374	2699755	4523432	2264677	5896928	5668965	5972001	477505	1	420551	1507731	844330	1659168	5244691	5037693	4919277	(126.054245, 49184.496)(108.0437, 36940.754)(109.04716, 2232.0076)(128.06837, 5978.061)(129.065, 279.765)(111.0555, 106.57)(146.09215, 573.5483)(130.08542, 5365.355)(152.15181, 4118.2837)(153.15756, 8629.148)(154.05774, 2928.3767)(134.27757, 3687.8413)
CPD-400	guaiacol	1	1	1	1	1961692	1	4449799	1	2397748	1	1	1	7317233	7590158	7113877	1	1	1	1	1	1	10222499	1	10694643	(126.05459, 114003.97)(127.89335, 2938.4216)(107.21354, 19435.037)(108.244934, 36319.95)(109.04825, 4110.9224)(128.06833, 11238.15)(107.04773, 34764.895)(142.08534, 63031.64)(143.08803, 5109.9175)(124.07497, 59822.33)(125.07278, 7786.215)(150.92627, 174580.84)(152.05708, 170134.12)(133.0407, 311.92667)
CPD-173	salicyl alcohol	1	1	1	1	1961692	1	4449799	1	2397748	1	1	1	7317233	7590158	7113877	1	1	1	1	1	1	10222499	1	10694643	(126.05459, 114003.97)(127.89335, 2938.4216)(107.21354, 19435.037)(108.244934, 36319.95)(109.04825, 4110.9224)(128.06833, 11238.15)(107.04773, 34764.895)(142.08534, 63031.64)(143.08803, 5109.9175)(124.07497, 59822.33)(125.07278, 7786.215)(150.92627, 174580.84)(152.05708, 170134.12)(133.0407, 311.92667)
CPD-3762	5-amino-4-imidazolecarboxyamide	1700929	1650115	1980454	901290	2954650	1736335	2246451	1169082	2160953	1977478	2422870	1990588	1123229	724043	1136662	1672577	806392	1	1150016	829362	1471252	5081104	5032518	4919277	(126.09782, 27197.543)(108.0437, 40831.734)(109.046814, 1772.5525)(128.12251, 2406.299)(129.06601, 322.09998)(111.944984, 1774.5167)(113.059, 213.39)(147.72864, 11114.066)(147.51997, 5855.296)(130.25119, 2636.155)(131.08382, 2382.4312)(151.87318, 3163.8457)(153.94034, 4886.9634)(154.0498, 14108.01)(131.0335, 254.40001)
DELTA1-PIPERIDEINE-2-CARBOXYLATE	1-piperideine-2-carboxylate	1805522	1965868	1954344	1330880	3034790	2768769	2775118	2368737	2436374	2699755	4523432	2264677	5896928	5668965	5972001	477505	1746002	420551	1507731	844330	1659168	5244691	5037693	4919277	(126.137856, 47162.09)(130.0619, 9934.42)(108.043724, 35803.633)(109.04716, 2232.0076)(128.02663, 5746.362)(129.065, 279.765)(110.052795, 3036.73)(146.09215, 573.5483)(130.08565, 6642.5938)(152.14725, 63677.934)(153.14833, 15418.69)(154.05708, 4069.905)(134.26466, 3624.1882)
CPD-6122	1,5-diazabicyclononane	1	1	1	1	1	1	304793	246437	236602	1	1	1	413228	1	379906	426365	330738	289655	1	1	1	1	1	1	(127.12219, 8895.161)(146.16406, 2039.6713)
CPD-7969	sulcatone	1822935	1874032	1927956	2568401	3084325	2906627	2121226	2246980	2169566	2276341	2108032	2402351	816260	740295	800362	2081836	1993212	1854841	3646656	2530292	2437780	474588	490573	1	(127.413864, 4043.1902)(128.10628, 10860.233)(127.111145, 1514.19)(109.10048, 42677.867)(110.103806, 3250.5857)(111.116104, 148.805)(149.09625, 2372.232)(150.09297, 1106.2825)(131.08458, 16949.62)(132.08069, 223.265)
CPD-10205	4-hydroxy-5-methyl-2-methylene-3(2H)-furanone	5056820	1	4152966	4016512	4638187	3895752	3010731	5263648	5592854	6064359	5631855	5470740	13766699	13423226	13179034	1408030	2023254	2137325	4003799	2929896	4689075	16283523	16997468	10405444	(127.8385, 27888.887)(128.03812, 1102.04)(113.03315, 16316.002)(127.03904, 93493.16)(128.04088, 7553.2026)(109.02819, 28543.443)(110.03198, 3238.2878)(144.06476, 25153.777)(145.07239, 3646.7798)(146.0798, 429.005)(126.05438, 73580.92)(128.05115, 2153.685)(149.02194, 3066.3188)
CPD-16	phloroglucinol	5056820	1	4152966	4016512	4638187	3895752	3010731	5263648	5592854	6064359	5631855	5470740	13766699	13423226	13179034	1	1	1	4003799	2929896	4689075	16283523	16997468	10405444	(127.8385, 27888.887)(128.03812, 1102.04)(113.03315, 16316.002)(127.03935, 104249.09)(128.04099, 9227.978)(109.028275, 30825.615)(110.032074, 3470.9814)(144.06476, 25153.777)(145.07239, 3646.7798)(146.0798, 429.005)(126.05442, 84466.05)(128.05115, 2153.685)(149.0215, 1075.656)
CPD-195	octanoate	10023379	8307850	10057317	1557288	5442630	5165249	8828985	8549195	1	10046806	8190919	8337120	228111	10374703	130804	9885841	8173873	8071791	1	5229827	5332143	1	9937646	5436802	(128.10594, 69429.016)(129.10817, 5066.394)(169.48029, 465.95)(171.11261, 47.725)(127.90714, 60846.04)(128.60745, 50429.477)(146.11624, 30801.16)(147.1188, 488.2)(148.08627, 7407.244)
CPD-9757	L-&alpha;-(methylenecyclopropyl)-glycine	666835	546888	1	584141	729409	547789	1370719	1279233	1471434	1037630	777572	961766	1487598	12163519	12004700	1644263	2561187	249217	710248	641843	702132	20573740	822067	21319870	(128.20712, 4396.9814)(129.34132, 2074.0518)(130.0739, 420.94)(109.049416, 9706.583)(130.83922, 5336.6143)(130.57245, 1144.945)(110.05946, 83879.72)(111.06106, 5103.2056)(146.35197, 4939.758)(148.104, 7259.5835)(131.48921, 53092.125)(131.59695, 1501803.1)(132.1013, 1648727.6)(150.50055, 106185.234)(152.65637, 344348.53)(153.05565, 53267.938)(135.30008, 2239.3826)(135.052, 247.67)
N-ETHYLMALEIMIDE	<i>N</i>-ethylmaleimide	1225000	1058725	1454121	2873341	1625002	2562472	2020672	2352878	10820167	11558034	11318091	11267644	6892155	12456514	6285907	753230	1033064	1	938167	1272419	1453904	4881930	4935623	4975124	(128.70499, 12568.266)(130.0053, 11111.434)(130.0585, 11186.23)(110.86287, 9739.819)(111.930466, 37543.094)(112.04965, 137811.72)(126.05459, 69623.35)(127.25596, 6965.3296)(128.05585, 885.87)(108.04383, 47100.176)(109.04705, 3850.8105)(145.30313, 8350.074)(146.78844, 3191.916)(126.32322, 1456.9827)(148.41171, 718.395)(130.0274, 522.17)
CPD-10211	furaneol (enol form)	1	736400	1057749	1	1	1	1	1515132	1	1	1177154	1	3181195	1	4054565	2035015	1	1	1	1311850	1294216	3460060	3447387	3542825	(128.93855, 8567.348)(130.38568, 9884.273)(131.85803, 287.148)(133.0578, 63.58)(110.66088, 4629.714)(111.0428, 1533.87)(129.43053, 10352.123)(130.5536, 621.29004)(111.04421, 8193.856)(112.0384, 276.69998)(146.74878, 5514.1147)(147.0796, 91.08)(128.0689, 7769.7026)(129.0636, 116.35)(152.91663, 241.89749)(135.0301, 15596.622)(137.0356, 338.16)
5-OXOPROLINE	5-oxo-L-proline	237148	1	1	1	1	1	172098	202229	243991	158791	166609	171054	250129	151084	169623	1	1	1	1	1	1	168281	200398	171460	(129.04192, 5230.855)(148.07425, 28318.639)(149.40858, 1623.2227)(151.07677, 2618.06)(129.90767, 5873.013)
2K-4CH3-PENTANOATE	4-methyl-2-oxopentanoate	1	328226	1995295	1	1	1	1	1	1	419041	1	1	7819817	934786	3080754	1	1	1	1	1	1	2927042	2181525	878312	(129.0539, 13035.605)(130.05247, 1352.9432)(111.04406, 8406.283)(112.0384, 429.94)(130.43643, 7051.4224)(113.34312, 1880.663)(115.05843, 826.74005)(117.0662, 823.49)(147.09036, 12314.176)(148.0922, 248.685)(130.2278, 2514.7097)(131.58505, 319.9375)(154.0499, 6419.746)(155.05237, 902.3)(137.7573, 1746.2316)(139.0469, 907.72)
2-KETO-3-METHYL-VALERATE	(<i>S</i>)-3-methyl-2-oxopentanoate	1	328226	1995295	1	1	1	1	1	1	419041	1	1	7819817	934786	3080754	1	1	1	1	1	1	2927042	2181525	878312	(129.0539, 13035.605)(130.05247, 1352.9432)(111.04406, 8406.283)(112.0384, 429.94)(130.43643, 7051.4224)(113.34312, 1880.663)(115.05843, 826.74005)(117.0662, 823.49)(147.09036, 12314.176)(148.0922, 248.685)(130.2278, 2514.7097)(131.58505, 319.9375)(154.0499, 6419.746)(155.05237, 902.3)(137.7573, 1746.2316)(139.0469, 907.72)
2-OXOHEXANOATE	2-oxohexanoate	1	328226	1995295	1	1	1	1	1	1	419041	1	1	7819817	934786	3080754	1	1	1	1	1	1	2927042	2181525	878312	(129.0539, 13035.605)(130.05247, 1352.9432)(111.04406, 8406.283)(112.0384, 429.94)(130.43643, 7051.4224)(113.34312, 1880.663)(115.05843, 826.74005)(117.0662, 823.49)(147.09036, 12314.176)(148.0922, 248.685)(130.2278, 2514.7097)(131.58505, 319.9375)(154.0499, 6419.746)(155.05237, 902.3)(137.7573, 1746.2316)(139.0469, 907.72)
2-DEHYDROPANTOYL-LACTONE	2-dehydropantolactone	1030589	736400	1057749	320183	2091366	444894	531652	1515132	425493	549737	1177154	519658	3181195	616148	4054565	2035015	1256143	305017	359759	1311850	1294216	3460060	3447387	3542825	(129.2171, 5601.4966)(130.55206, 8221.928)(132.05836, 509.59)(133.0578, 63.58)(110.81413, 4492.4697)(112.043106, 985.385)(129.32733, 8020.1763)(130.5536, 621.29004)(111.04427, 8633.006)(112.04258, 389.83856)(113.03395, 322.605)(146.68965, 3996.9646)(147.83075, 339.93497)(128.4705, 5918.5234)(129.0636, 116.35)(151.97627, 5911.535)(152.03491, 3243.5078)(135.69939, 18432.947)(137.0356, 338.16)
THYMINE	thymine	3063440	2750471	2914190	2559009	6143999	4181669	1547353	1723884	3452097	3539982	3431179	1637956	1218764	1	1238199	7003470	1720530	6573623	2909724	491052	2599074	1	610271	513743	(129.6193, 7241.316)(130.55069, 52812.203)(131.0523, 5259.91)(110.4799, 12417.582)(112.0415, 1366.33)(128.05183, 84402.586)(128.04756, 4079.4941)(129.0532, 220.72)(111.37931, 23088.559)(112.14885, 25267.158)(114.05325, 653.57996)(144.23738, 73186.04)(145.21553, 9949.499)(146.08012, 570.32336)(128.12352, 11634.39)(131.0758, 639.82)(151.70575, 907.85834)(135.0294, 25136.89)
6-OXO-HEXANOATE	6-oxohexanoate	10493580	328226	1995295	331620	138761	495943	388518	9166246	343435	419041	11692081	9964387	7819817	934786	3080754	903427	896848	2115513	291199	11214087	11129854	2927042	2181525	878312	(129.68713, 8314.317)(131.05515, 2017.745)(111.16956, 7478.166)(112.904655, 5451.48)(130.27275, 12877.82)(131.06406, 622.595)(112.996, 54796.594)(114.05514, 2776.6223)(114.80688, 377.765)(147.18993, 6206.4146)(148.0922, 248.685)(130.13716, 3176.7937)(131.33492, 1362.2562)(154.04987, 4183.3325)(155.05237, 902.3)(138.25537, 2360.664)(139.04744, 1545.4)
23-DIMERCAPTOPROPAN-1-OL	2,3-dimercaptopropan-1-ol	129467	83724	101989	115091	143436	121472	113108	97628	95272	105957	115675	107760	111043	110226	113784	146588	1	79854	111979	123914	113510	85082	109557	102807	(129.99345, 5389.77)(106.947754, 15730.435)(111.98228, 5149.7925)(130.00618, 17267.766)(131.00046, 809.6367)(143.0364, 8285.7)(145.0337, 19279.807)(124.023705, 5636.7607)(125.0285, 379.32)(146.99367, 2629.0967)(130.63023, 19826.781)(132.97209, 444.38)
IMINOASPARTATE	2-iminosuccinate	438747	563867	364689	419727	489637	185775	1	404768	408310	365875	321224	321302	617640	603019	553758	1028036	760507	511222	522410	570011	519715	2992856	226125	264715	(130.00731, 11976.67)(115.0057, 442.81)(147.04189, 16153.396)(148.04298, 657.7025)(131.03116, 281.495)(157.007, 222.44)
CPD-8978	ethylphosphate	4171482	1649309	1313591	1022317	1	1	3953888	3583381	3608469	3407619	3113305	2098729	3334930	1	1	4338214	1	3227155	1	1	3411777	3396295	3545829	1	(130.01369, 295.4)(106.99115, 43809.47)(145.0966, 1638.0183)(146.0371, 906.716)(127.023766, 233844.55)(128.02448, 42139.33)(147.98145, 1584.9124)(130.34949, 38901.395)(131.9792, 526.56604)
GLUTACONATE	(<i>E</i>)-glutaconate	4699038	3479066	3816876	4428035	5739996	4857531	4429298	3918890	3730299	4360331	4001520	4014310	4352381	4239489	4299166	4995129	3730032	3565594	4450221	4568138	4598460	4138074	3647679	4306259	(130.01381, 1746.1031)(112.00584, 53005.766)(113.00803, 7956.498)(115.0115, 898.03)(129.0216, 251876.81)(130.02171, 12165.708)(131.0358, 822.96)(111.00934, 58783.89)(148.1959, 2634.6882)(131.04347, 16941.865)(132.04341, 2311.1821)(153.50893, 2190.3813)(154.96483, 1291.7386)(156.00844, 1828.3624)(135.99489, 406.08667)
CHLORALAN-CPD	3-chloro-L-alanine	1	1164294	1	3428694	6569199	5839952	6417166	5617806	5590356	5591194	5054865	636052	5320083	5300875	5364132	2801863	2827909	5036250	5309895	5522908	5456887	5366120	1	5127371	(130.01456, 281.18402)(112.005974, 7434.49)(129.02103, 48962.793)(130.02287, 2368.6565)(110.00812, 65604.875)(111.00956, 8189.09)(141.3243, 5893.661)(145.04794, 16029.786)(148.0539, 9496.343)(127.03613, 1502.5588)(153.00926, 535.8112)
VIGABATRIN	vigabatrin	955147	1	5017420	1122163	1594565	1125951	1001747	5347442	707967	4032271	532166	559257	4286359	2397070	1833066	1530299	1216777	1141683	3426603	3369805	4146858	1124233	1514407	3227200	(130.08485, 5167.333)(131.48354, 262.056)(133.0844, 197.07)(130.08551, 32621.145)(131.08838, 2605.5835)(112.07585, 7673.4844)(113.0772, 481.355)(148.83043, 35541.547)(148.1148, 4081.5466)(134.1165, 8714.58)(152.67812, 33909.67)(154.07123, 6500.783)(135.01694, 16548.229)(136.87308, 1625.5232)(139.07077, 2080.95)
L-PIPECOLATE	L-pipecolate	955147	1	1	1122163	1594565	1125951	1001747	1	707967	1	532166	559257	1	1	1	1530299	1216777	1141683	1	1	1	1	1	3227200	(130.08559, 43621.84)(131.08838, 2605.5835)(147.44594, 59779.645)(148.1148, 4081.5466)(134.1165, 8714.58)(153.23717, 9380.195)(155.57433, 6870.893)(135.89455, 11001.905)(138.52345, 1776.3336)(139.07077, 2080.95)
OCTANOL	1-octanol	1	761176	561400	909599	1183797	904448	411775	1	515604	545538	493624	546960	474646	448395	457397	1	1127452	1245528	583884	545824	567847	783106	1	910548	(130.15822, 22064.156)(131.16156, 2034.5576)(153.12645, 1879.2574)(135.11586, 26015.375)(136.11736, 1615.4308)
METHYLMETHANETHIOSULFONATE	methylmethanethiosulfonate	1	2175766	1	1	174667	1	661189	1	2758684	1	921305	1	1	73754	1	1	1	1	1	1108239	1	261789	1	372422	(130.31163, 20107.012)(130.9772, 43627.03)(113.96296, 225627.84)(128.983, 117.80499)(110.9737, 153.91)(112.97155, 1984.17)(145.01266, 6768.1177)(145.0143, 275.60498)(130.49702, 1383.9801)(154.9671, 726.755)
DIHYDRO-THYMINE	5,6-dihydrothymine	1829636	160875	2031602	1	3587612	2822906	2481059	1828354	2076173	2569782	3008876	1	1727682	1877171	1712036	1236489	1236163	1189478	1155715	1603117	1508055	1496754	1416866	1107123	(130.35791, 1160.7288)(131.46696, 1086.336)(133.0678, 986.93)(112.04983, 157360.06)(113.05203, 5697.6064)(114.05393, 806.3731)(129.30077, 1853.2941)(114.70226, 54182.797)(146.09044, 32858.027)(147.08952, 1286.7467)(130.42265, 16512.033)(131.09116, 675.19)(153.1468, 51447.203)(154.05415, 3925.3047)
PANTOYL-LACTONE	(<i>R</i>)-pantolactone	11939702	10087309	9608743	346906	547500	405316	339677	10129105	207952	188425	10235362	10285388	3442076	3507948	3815575	563076	401287	435264	6472549	160229	130553	1705662	493742	298540	(130.43828, 13058.301)(132.0509, 94.23)(112.264946, 79346.32)(113.13627, 2459.2874)(114.0524, 459.1)(133.36095, 6220.6045)(115.938805, 24677.547)(117.0706, 1945.4188)(151.80606, 1746.708)(130.31473, 29139.686)(131.08884, 2314.0916)(153.05449, 45583.277)(154.05536, 2157.3953)(138.5828, 7725.1978)(139.83278, 39506.42)(139.0495, 1714.13)(140.055, 82815.64)
CPD0-1327	5-fluorouracil	2868794	2412846	2199232	2293608	1430259	1062636	1190609	2153327	2019495	197445	2276054	1333477	2081060	2069053	984109	3228825	2389901	1	867209	1488120	2308295	1252291	915896	1110470	(130.85019, 11044.286)(112.00586, 22271.512)(113.00802, 3182.729)(114.01535, 7075.197)(115.01951, 2655.0645)(148.14098, 6477.91)(149.65881, 368955.56)(131.0439, 7296.3403)(132.0434, 901.2445)(135.05283, 6835.5044)(153.00923, 1314.877)(154.00816, 265.22668)(135.99548, 225.14)
CPD-19511	indole-3-carbinonium ion	7186131	6404600	6373400	633036	291166	5874355	5861308	4049516	4183178	5718298	5475017	5687271	3253938	3309933	3268951	1482546	1308058	6249847	539176	6772322	383306	2084683	1849442	2422040	(131.02417, 13757.914)(131.49596, 2714.8723)(132.0517, 282.65)(132.07903, 615.35)(149.57773, 5704.6616)(152.1067, 75.78)(153.05577, 65258.73)(154.0532, 3581.2197)
3-UREIDO-PROPIONATE	3-ureidopropanoate	947458	1	348082	329041	1071069	391866	411547	342315	1098927	1	993876	325270	294513	265335	242686	1	274395	235199	343879	354528	371992	248417	241348	247381	(131.2105, 13977.654)(132.0434, 2082.4038)(113.12904, 10485.936)(114.03688, 425.985)(135.53683, 11939.211)(136.68106, 258605.95)(136.56215, 1430516.0)(137.0634, 164551.53)(116.0484, 351.18668)(151.08136, 4422.9126)(154.0941, 52307.19)(154.03607, 2873.024)(136.44624, 1986.1846)
CPD-9673	trichloroethanol	1	1	1	1	218660	1	266846	218416	221440	192360	171538	192319	1	1	1	100839	129406	105530	1	1	83661	1	1	1	(131.92874, 2765.097)(133.92583, 703.82404)(168.32106, 1829.9481)(170.95569, 568.08624)(172.95544, 1031.54)
CPD-9674	2,2-dichloroacetate	1	2409581	2406571	3140173	1806576	2082617	1	2141611	2165164	1799633	2324216	2372147	1183200	1	1800882	1	1	1	2444747	2260266	1	3091701	1097656	1	(131.92891, 14293.99)(117.934494, 86.85625)(129.58472, 7215.7964)
CPD-7619	heptanoate	133456	134105	132690	187021	136833	196887	158956	165617	150015	136075	145247	148943	2956798	2857194	2685778	112922	147289	148809	171934	158835	154177	3908584	3842374	3989251	(132.09967, 13050.19)(133.10037, 37496.457)(134.10336, 2684.3967)(111.2233, 15965.091)(113.42337, 3224.2366)(114.0919, 1960.49)(132.85497, 267974.12)(133.10437, 23534.459)(113.66117, 20432.094)(113.089134, 2832.7334)(114.0916, 152.62)(149.13167, 210493.88)(150.13489, 24718.508)(155.3269, 44401.355)(155.59169, 11500.296)(157.0962, 108.39)(138.33456, 3883.08)
CPD-19956	butyl propanoate	361605	324563	311352	1246750	1190316	197335	472108	857845	1042459	1474859	1466629	1506592	277120	247632	2511426	1	514324	549129	1241386	1298587	1228147	347431	332909	325314	(132.10103, 918264.5)(133.10435, 85066.23)(134.10683, 7255.1274)(112.88753, 17182.27)(113.0892, 3461.39)(114.0916, 181.23)(134.66557, 12385.002)(136.11884, 979.2445)(153.72217, 46582.56)(155.19722, 3043.039)(156.10077, 2161.4775)(136.4843, 7101.819)(139.08588, 1071.51)
CPD-825	4-guanidinobutyraldehyde	1705691	1329929	1379257	1404677	1486008	1475201	689241	1249079	1190896	223608	195861	217982	3076072	3159938	3244634	1083623	880208	772569	1783106	1827645	384993	3951834	3915351	3913562	(132.10112, 1019173.3)(133.10402, 77565.76)(134.10606, 8091.8584)(112.41964, 26836.055)(113.08921, 2938.7532)(134.51534, 8567.17)(136.11887, 468.07)(149.13109, 3042.7673)(153.97946, 70512.96)(155.08876, 9681.019)(157.0962, 121.3)(137.75113, 3835.7898)
CPD0-2459	triethanolamine	62099668	53700936	54709028	85780224	96348816	83530816	51251316	46949352	48040680	37781128	38692468	39788004	24801716	24911240	24873132	108395872	93303184	94270688	48646104	50556512	50603168	9623540	9497703	9910036	(132.10127, 1255879.9)(133.10439, 82574.45)(134.0986, 1691.5701)(151.12157, 5292.8394)(134.11517, 3455.5667)(174.9952, 406.0267)(157.17772, 9219.437)
CPD-2461	methylsuccinate	350529	342190	635902	1869983	2995603	1	1	3082184	3402280	2227221	835621	1156725	2278801	2091866	2400361	1171554	1213470	990160	1002442	352459	724936	4815664	4196326	1929576	(132.6986, 1628.8301)(112.017746, 2361.1401)(134.04495, 1432.5914)(148.28688, 2995.3037)(149.05965, 476.365)(130.04926, 74075.34)(131.05212, 4006.5852)(132.0516, 115.785)(153.77219, 1289.18)(154.0241, 170.61)
GLUTARATE	glutarate	350529	342190	635902	1869983	2995603	1	1	3082184	3402280	2227221	835621	1156725	2278801	2091866	2400361	1171554	1213470	990160	1002442	352459	724936	4815664	4196326	1929576	(132.6986, 1628.8301)(112.017746, 2361.1401)(134.04495, 1432.5914)(148.28688, 2995.3037)(149.05965, 476.365)(130.04926, 74075.34)(131.05212, 4006.5852)(132.0516, 115.785)(153.77219, 1289.18)(154.0241, 170.61)
2-ACETO-LACTATE	(<i>S</i>)-2-acetolactate	455982	1	382086	431144	299586	286151	467797	554334	685076	692710	568641	417658	1361415	1783262	1997587	780050	1	1	188355	187129	135041	1697562	1600210	1142353	(132.8737, 724.3516)(135.04475, 2265.725)(113.02377, 557.48)(133.44525, 842.72)(135.05055, 915.97253)(117.485435, 3671.7478)(117.0389, 3563.08)(149.64914, 7837.042)(150.5757, 151.05501)(132.70877, 4096.681)(133.0652, 8855.03)(154.71011, 689.0563)(138.01874, 305.31335)
2-OXOSUCCINAMATE	2-oxosuccinamate	824086	678193	764435	861942	1293295	933053	952520	745826	701359	915492	888245	785136	786788	846794	841253	965839	850810	732014	737120	843613	897027	728969	1	704056	(132.87582, 1143.7737)(112.00585, 54859.64)(113.00814, 8673.28)(113.00801, 8208.246)(151.38869, 390.25333)(131.21547, 10844.76)(132.04338, 2438.1287)(154.0085, 957.4305)(156.00842, 1900.8766)(135.99466, 415.96143)
ASN	L-asparagine	1040784	3946294	4698044	3967316	3034433	3277887	1	5137568	5134291	5357125	1	687313	433841	1	6613120	2694359	2782016	1540955	3879885	777356	3626840	1040149	1	8961681	(132.95543, 101515.75)(135.16115, 124925.266)(136.17352, 139251.31)(136.86243, 98996.02)(115.045105, 206.935)(133.05937, 3081.638)(115.36833, 3967.2205)(119.0602, 6060.69)(150.29877, 67649.53)(151.32336, 8720.114)(132.16321, 12920.204)(158.85254, 2126.7349)(160.05478, 3103.9783)(138.53627, 995.78754)
MAL	(<i>S</i>)-malate	2604825	2070688	1400309	2009395	2518605	180622	2313135	541751	2002056	1980371	1857089	1975497	1964463	1845517	1902837	318793	2068867	1798443	219163	2208267	235696	1901878	1499555	1913775	(133.0063, 1298.5941)(135.01091, 126.41248)(136.19087, 455.00168)(136.02335, 260.765)(115.005424, 11343.848)(116.01499, 143.42058)(152.04605, 372.315)(137.03798, 27237.21)(157.37798, 91385.49)(158.25229, 322940.06)(159.21394, 21296.58)(160.00345, 1770.9926)
L-GLUTAMATE_GAMMA-SEMIALDEHYDE	L-glutamate-5-semialdehyde	876940	827027	882227	755354	1205157	1	614314	544060	555279	784736	730069	801159	2303653	2336222	2458120	1396222	1403044	1273953	868790	892182	871245	5843348	5659196	6001472	(133.06393, 22546.355)(134.46367, 21717.934)(135.0634, 195.02)(115.05306, 13313.079)(117.05726, 1076.2534)(135.79988, 46115.82)(136.80219, 16395.56)(137.07623, 2694.09)(117.364334, 7389.089)(118.399414, 11117.829)(119.068695, 931.9375)(149.09453, 11714.959)(150.093, 1544.498)(131.08394, 3574.9155)(132.0817, 188.82)(154.04938, 36343.836)(155.05257, 9321.305)(138.95001, 4974.445)(140.04799, 1985.41…
5-AMINO-LEVULINATE	5-aminolevulinate	876940	827027	882227	755354	1205157	1	614314	544060	555279	784736	730069	801159	2303653	2336222	2458120	1396222	1403044	1273953	868790	892182	871245	5843348	5659196	6001472	(133.06393, 22546.355)(134.46367, 21717.934)(135.0634, 195.02)(115.05306, 13313.079)(117.05726, 1076.2534)(135.79988, 46115.82)(136.80219, 16395.56)(137.07623, 2694.09)(117.364334, 7389.089)(118.399414, 11117.829)(119.068695, 931.9375)(149.09453, 11714.959)(150.093, 1544.498)(131.08394, 3574.9155)(132.0817, 188.82)(154.04938, 36343.836)(155.05257, 9321.305)(138.95001, 4974.445)(140.04799, 1985.41…
GLUTAMATE-1-SEMIALDEHYDE	(S)-4-amino-5-oxopentanoate	876940	827027	882227	755354	1205157	1	614314	544060	555279	784736	730069	801159	2303653	2336222	2458120	1396222	1403044	1273953	868790	892182	871245	5843348	5659196	6001472	(133.06393, 22546.355)(134.46367, 21717.934)(135.0634, 195.02)(115.05306, 13313.079)(117.05726, 1076.2534)(135.79988, 46115.82)(136.80219, 16395.56)(137.07623, 2694.09)(117.364334, 7389.089)(118.399414, 11117.829)(119.068695, 931.9375)(149.09453, 11714.959)(150.093, 1544.498)(131.08394, 3574.9155)(132.0817, 188.82)(154.04938, 36343.836)(155.05257, 9321.305)(138.95001, 4974.445)(140.04799, 1985.41…
4-HYDROXY-L-PROLINE	<i>trans</i>-4-hydroxy-L-proline	876940	827027	882227	755354	1205157	1	614314	544060	555279	784736	730069	801159	2303653	2336222	2458120	1396222	1403044	1273953	868790	892182	871245	5843348	5659196	6001472	(133.06393, 22546.355)(134.46367, 21717.934)(135.0634, 195.02)(115.05306, 13313.079)(117.05726, 1076.2534)(135.79988, 46115.82)(136.80219, 16395.56)(137.07623, 2694.09)(117.364334, 7389.089)(118.399414, 11117.829)(119.068695, 931.9375)(149.09453, 11714.959)(150.093, 1544.498)(131.08394, 3574.9155)(132.0817, 188.82)(154.04938, 36343.836)(155.05257, 9321.305)(138.95001, 4974.445)(140.04799, 1985.41…
5-AMINO-2-OXOPENTANOATE	5-amino-2-oxopentanoate	876940	827027	882227	755354	1205157	1	614314	544060	555279	784736	730069	801159	2303653	2336222	2458120	1396222	1403044	1273953	868790	892182	871245	5843348	5659196	6001472	(133.06393, 22546.355)(134.46367, 21717.934)(135.0634, 195.02)(115.05306, 13313.079)(117.05726, 1076.2534)(135.79988, 46115.82)(136.80219, 16395.56)(137.07623, 2694.09)(117.364334, 7389.089)(118.399414, 11117.829)(119.068695, 931.9375)(149.09453, 11714.959)(150.093, 1544.498)(131.08394, 3574.9155)(132.0817, 188.82)(154.04938, 36343.836)(155.05257, 9321.305)(138.95001, 4974.445)(140.04799, 1985.41…
CPD-9727	5-hydroxy-2-oxopentanoate	455982	1	1	431144	299586	286151	467797	554334	685076	692710	568641	417658	1361415	1783262	1997587	1	1	1	1	187129	1	1697562	1600210	1142353	(133.24135, 742.3651)(135.04475, 2265.725)(113.0234, 509.33)(133.95499, 883.4918)(135.05055, 915.97253)(118.24272, 5128.098)(149.36325, 8749.854)(150.0751, 245.85)(132.63351, 4913.618)(133.0652, 8855.03)(154.29128, 817.79)(138.01874, 305.31335)
L-ORNITHINE	L-ornithine	587522	658686	480063	796717	746159	623627	439953	716273	752951	744993	380916	847796	264379	276818	489487	673202	686791	697263	741932	1	788352	587917	1	661426	(133.70119, 25064.332)(134.10254, 1808.6194)(136.10974, 227.83)(116.0959, 24003.084)(137.13133, 2667.306)(159.4123, 2558.8608)(160.55664, 1812.6669)(161.0953, 3477.01)(142.5845, 5891.2583)
CINNAMALDEHYDE	cinnamaldehyde	1224171	904385	1117683	1488755	1611563	565070	766169	1092287	1106438	847296	895620	821710	1351406	1171080	772716	2445623	2272389	2203058	468351	586322	580335	2169675	1925941	1827499	(133.77757, 2562.4238)(135.76859, 11396.69)(137.07275, 673.395)(115.854904, 19799.494)(117.726036, 9086.509)(119.06414, 8405.07)(135.32098, 19500.99)(137.07648, 783.37256)(115.0531, 15480.058)(150.09073, 26922.771)(151.09245, 3393.1628)(133.12514, 18911.281)(159.06003, 4635.6323)(160.0571, 15381.92)(139.41914, 1530.6426)
3-METHYLTHIOPROPANALDOXIME	(<i>E</i>)-4-(methylsulfanyl)butanal oxime	1	1	1012856	1	188067	1	1	606694	1	1732425	1472219	2466263	1	1046969	1471878	1545814	161502	1108483	87924	126301	1390810	216824	1	1	(133.84196, 3026.3152)(135.0545, 59.05)(118.58686, 5241.339)(118.0418, 464.68)(135.92789, 432465.2)(136.92865, 29040.824)(117.27827, 7274.025)(119.5484, 1740.675)(151.78792, 5707.103)(154.0848, 17853.11)(136.07695, 362.775)(137.0759, 3312.88)(157.13063, 4273.6543)(140.63441, 3692.198)(142.21594, 7465.0127)(143.03441, 16533.94)
PTERIDINE-RING	pteridine-ring	1302898	1117604	1153039	1835494	1836116	1728830	2178799	2071932	2060690	1889182	1830273	1775232	7272793	7194839	7030360	1946632	1549834	1521442	1682091	1721514	1699546	15298593	14454007	15006878	(134.04558, 2140.2)(135.052, 315.78)(133.8685, 4174.702)(150.07655, 99644.06)(151.08168, 9193.69)(152.0677, 3828.01)(156.21675, 938.0609)
NUKED-PENTOSE-RING	nt-pentose-ring	1122992	1	1273835	976952	1231333	1073043	656222	640102	1065220	640750	1024296	752672	938764	1	1067520	1277723	1	985822	1341476	1651762	1	674002	654574	1	(134.05873, 14305.668)(135.05548, 861.10895)(119.77051, 442.42715)(120.0569, 574.51)(136.60825, 15985.645)(137.07175, 2489.7249)(117.47812, 5708.928)(121.06492, 1097.9175)(122.0644, 214.73)(154.76329, 9849.512)(155.5282, 946.10144)(156.10097, 412.02)(137.91347, 5963.197)(158.99939, 2902.074)(161.60153, 5184.204)(161.06035, 1949.005)(142.04315, 606.45386)
3-4-DIHYDROXYBENZOATE	protocatechuate	38522236	1407745	6258810	1	34067056	34050368	35032292	30041300	29588552	20502062	26531694	30394928	5849519	28552000	28906756	36588404	30104078	31911640	1	33368798	16572164	27603262	28740770	27575168	(135.01047, 173.95)(157.03635, 180.595)(171.0509, 1166.89)(155.71277, 836.4133)(177.00986, 65.58)(158.13863, 370804.7)(159.13985, 23224.107)(160.00348, 1217.5287)
CPD0-1274	3,5-dihydroxybenzoate	38522236	1	1	1	34067056	34050368	35032292	30041300	29588552	20502062	26531694	30394928	5849519	28552000	28906756	36588404	30104078	31911640	1	33368798	16572164	27603262	28740770	27575168	(135.01047, 173.95)(157.03635, 180.595)(171.05092, 1025.56)(155.5455, 340.70502)(177.00986, 65.58)(158.15228, 369641.7)(159.15349, 23152.398)(160.0035, 1304.092)
CPD-633	gentisate	38522236	1	1	1	34067056	34050368	35032292	30041300	29588552	20502062	26531694	30394928	5849519	28552000	28906756	36588404	30104078	31911640	1	33368798	16572164	27603262	28740770	27575168	(135.01047, 173.95)(157.03635, 180.595)(171.05092, 1025.56)(155.5455, 340.70502)(177.00986, 65.58)(158.15228, 369641.7)(159.15349, 23152.398)(160.0035, 1304.092)
CPD0-2489	2-hydroxy-3-nitropropionate	1305487	744348	869475	616854	436588	375586	915480	201359	401784	580213	809665	839503	799875	770895	356884	1435309	727794	13033	822748	868612	501507	412609	527628	757256	(135.01167, 447.1014)(137.58185, 498.8978)(140.03125, 103.32)(156.0469, 978.38)(137.038, 24854.924)(157.96045, 374780.47)(159.00354, 24182.146)(160.00368, 1636.9083)(141.90796, 7280.3813)(143.95737, 27454.93)(143.9984, 22792.39)
CPD0-1571	L-thiazolidine-4-carboxylate	236365	1650512	1596394	1454125	1594399	1577687	1496301	1413739	1471872	1598886	1473569	1554058	517066	473850	504469	1	1568396	1400993	1565733	1617045	1391270	683183	681644	695790	(135.0124, 278.478)(115.005714, 9393.132)(116.01557, 345.7569)(135.72157, 2525.1582)(138.17064, 2720.733)(116.015236, 381.24332)(152.43993, 84031.055)(153.88507, 11164.465)(154.0565, 9056.29)(136.8805, 22284.12)(156.31245, 4694.494)(158.00194, 55185.625)(143.00085, 140171.12)
CPD-1091	(<i>S</i>)-ureidoglycolate	663000	218957	220060	270777	263435	236698	1	240798	251176	268364	256902	276793	1	1	1	735484	267342	255271	194676	188424	220601	1	1	1	(135.02946, 27108.348)(116.015, 444.845)(138.67877, 6768.745)(119.02745, 198889.69)(151.12296, 7135.0454)(137.28491, 21485.697)(158.52136, 145.56)(160.02385, 694.005)(160.0185, 535.95)(161.0281, 929.09)(143.0147, 391.57)
CPD0-2298	(<i>S</i>)-ureidoglycine	1	1	1	1	1	1	1	117853	1	1	1	1	1	465036	1	1287539	599246	508012	529798	715115	1	388937	1	448585	(135.30374, 7505.438)(115.03791, 3751.197)(135.61641, 32885.473)(136.81134, 2785.4185)(117.71677, 628.4367)(152.75267, 849.5967)(154.0853, 29958.67)(155.0877, 2693.07)(134.57324, 47296.17)(156.91689, 4847.159)(158.0391, 186.12)(141.28383, 12179.799)(143.0368, 24948.29)
CPD-597	<i>N</i>-carbamoylputrescine	927878	915604	804597	724573	1276741	1186389	465401	460252	451463	687936	648395	697235	672779	643304	653869	1325675	1	1232525	1053556	1055526	1069987	700920	705305	677622	(135.37752, 18135.158)(136.11888, 1239.3479)(137.1312, 1916.48)(158.2133, 3366.6187)(159.1153, 2239.26)(137.0952, 27207.682)(138.09775, 1614.8566)
CPD-6361	indolin-2-one	1	801722	1	132465	1	1	247964	813119	1	166480	133722	935368	1208876	1255784	1706858	152605	1	1	1	152587	154191	1206509	1096402	1	(135.68561, 16205.539)(137.06264, 1656.2428)(117.04635, 216.705)(135.98705, 25293.139)(135.05937, 3019.8772)(118.79202, 6711.6304)(120.51763, 2468.4924)(121.0641, 560.47504)(155.09605, 446.45667)(136.58588, 1589.6031)(138.0906, 183.575)(158.11543, 9229.775)(160.05388, 6313.1465)(138.17108, 3524.2527)(142.0475, 10615.97)
CPD-7268	<i>N</i>-benzylformamide	5044270	4060654	4475150	6437421	4100448	1164993	1102265	4604889	5627722	3184657	3694630	4311804	6116454	3334060	2455193	8624587	8202160	4933534	1064074	921385	5128488	3357253	2931770	1	(136.01527, 109447.086)(137.22662, 10485.757)(117.05756, 8558.928)(136.64708, 62297.3)(137.07364, 3737.8198)(118.065285, 42253.6)(119.06407, 6280.776)(157.32349, 4387.475)(136.5947, 1165.7424)(159.8148, 2776.0012)(162.40613, 2528.2932)(163.0706, 230.84)(141.71848, 3648.6628)(142.0509, 5687.97)
L-CANALINE	L-canaline	2757726	2436734	2288303	1470081	1	1392642	1749384	1878406	1854500	665725	1	2467414	2810950	2424270	2469637	926198	999754	1116890	1094878	1725619	1066959	3657220	377539	3600270	(136.02632, 77672.93)(137.17352, 5519.229)(117.56229, 6525.276)(118.42895, 11466.759)(119.06433, 1667.3586)(138.48477, 1653.4779)(117.56591, 6993.9976)(119.7387, 1032.4066)(121.0761, 660.5433)(152.10558, 7577.6626)(153.09995, 419.00497)(134.09557, 28846.62)(135.09534, 3994.5093)(160.06726, 2775.0376)(161.43231, 5068.4175)(161.0701, 12264.01)(139.14377, 3493.558)(141.54599, 2115.665)
INDOXYL	indoxyl	1	1	1	1	1	1	1	1	1	1	1	1	1	1	1	1	1	254136	1	1	1	1	1	1	(136.0614, 26047.18)(137.0596, 9991.79)(134.0596, 10987.41)(135.0704, 232.02)(117.0557, 855.36)(119.0611, 244.43)(121.0644, 4654.46)(156.098, 262.01)(135.0793, 1481.89)(160.054, 8352.93)(161.0591, 8756.64)
CPD-12702	(<i>R</i>)-mandelonitrile	1	1	1	1	1	1	1	1	1	1	1	1	1	1	1	1	1	254136	1	1	1	1	1	896180	(136.0614, 26047.18)(137.0596, 9991.79)(134.0597, 22948.27)(135.0636, 1367.59)(118.0569, 1893.28)(120.06285, 1341.065)(121.0644, 4654.46)(156.098, 262.01)(135.0793, 1481.89)(159.55121, 11232.98)(160.5567, 9416.824)
SS-DIMETHYL-BETA-PROPIOTHETIN	dimethylsulfoniopropanoate	5266357	1973782	1663561	210895	757157	217294	356660	3676337	307245	468619	493022	421506	2803747	7872153	8335391	1488582	912598	849948	286532	272954	298236	1352641	1554827	1558630	(136.31366, 10545.046)(119.02797, 38655.37)(120.77783, 3183.4316)(121.030464, 1747.2699)(138.1726, 5848.132)(139.88203, 767.87006)(140.0491, 633.92)(118.036896, 14351.542)(120.0397, 725.32)(155.69421, 29510.527)(155.40714, 8568.2295)(157.07384, 10993.538)(135.39449, 18524.35)(136.85938, 6192.976)(158.88548, 635.6058)(161.02805, 565.095)
CPD-13357	(2<i>R</i>)-2,3-dihydroxy-3-methylbutanoate	909728	1658556	936733	2916156	2306194	2825646	634847	1	763620	637202	616102	1	290920	1	1	1	1554785	1	2113315	1959673	1	1	1	617139	(136.39201, 6739.0483)(116.49715, 4566.9)(134.0588, 18389.756)(135.05594, 979.41864)(119.48537, 952.28284)(120.05545, 411.22998)(151.75156, 3634.1848)(133.47455, 6701.595)(159.04579, 2383.974)(139.9093, 1484.785)(140.0338, 1740.07)
2-HYDROXYSUCCINAMATE	2-hydroxysuccinamate	325351	1	255552	1	257929	293321	302413	251999	1	290792	1	244268	282271	241367	241994	101965	218611	217426	1	278357	298523	248929	211792	245896	(136.61623, 9093.308)(114.19262, 15062.421)(119.02737, 66837.16)(119.0346, 36452.105)(120.03975, 712.345)(152.30396, 1200.9658)(154.07144, 1232.6031)(135.69241, 15716.101)(136.06104, 1794579.0)(137.06325, 158364.12)(155.48016, 1608.3376)
CPD-302	D-aspartate	325351	1	255552	1	257929	293321	302413	251999	1	290792	1	244268	282271	241367	241994	101965	218611	217426	1	278357	298523	248929	211792	245896	(136.61623, 9093.308)(114.19262, 15062.421)(119.02737, 66837.16)(119.0346, 36452.105)(120.03975, 712.345)(152.30396, 1200.9658)(154.07144, 1232.6031)(135.69241, 15716.101)(136.06104, 1794579.0)(137.06325, 158364.12)(155.48016, 1608.3376)
L-ASPARTATE	L-aspartate	325351	1	255552	1	257929	293321	302413	251999	1	290792	1	244268	282271	241367	241994	101965	218611	217426	1	278357	298523	248929	211792	245896	(136.61623, 9093.308)(114.19262, 15062.421)(119.02737, 66837.16)(119.0346, 36452.105)(120.03975, 712.345)(152.30396, 1200.9658)(154.07144, 1232.6031)(135.69241, 15716.101)(136.06104, 1794579.0)(137.06325, 158364.12)(155.48016, 1608.3376)
3-HYDROXYBENZOATE	3-hydroxybenzoate	1	1	1	1	1	405718	1	1	1	1	1	1	265743	250440	263461	646261	543415	1	258403	1	1	1	1	205842	(137.02448, 9817.487)(138.01836, 274.46)(140.0354, 5751.758)(159.1928, 1901.3126)(160.07277, 6344.31)(138.42908, 26046.268)(139.0511, 3490.8171)(141.05643, 605.80005)(143.00172, 17100.047)(145.008, 3645.43)
CPD-110	salicylate	1	1	1	1	1	405718	1	1	1	1	1	1	265743	250440	263461	646261	543415	1	258403	1	1	1	1	205842	(137.02448, 9817.487)(138.01836, 274.46)(140.0354, 5751.758)(159.1928, 1901.3126)(160.07277, 6344.31)(138.42908, 26046.268)(139.0511, 3490.8171)(141.05643, 605.80005)(143.00172, 17100.047)(145.008, 3645.43)
3-AMINOPROPYL-METHYL-PHOSPHINATE	3-aminopropyl-methyl-phosphinate	1	1	4401485	1	6697456	1	1	5608053	5740929	6165552	4423092	4464123	1	4964199	2900429	1	1	1	1	1	1	4358264	2759192	2968557	(137.06314, 118184.195)(120.38703, 13587.196)(120.0477, 510.55)(140.06969, 56049.88)(141.82513, 5088.601)(143.08061, 3574.7969)(121.86023, 12484.623)(125.07073, 232.42)(155.67934, 5379.4214)(158.1028, 7825.09)(138.34016, 11818.238)(139.08653, 2075.89)(162.72217, 1946.6815)(164.05876, 1568.3434)(164.39513, 2369.1768)(165.06345, 988.645)(144.6314, 110103.65)(145.86897, 61539.566)(146.71982, 4572.63…
CPD-4862	<i>N</i>-hydroxy-L-valine	985621	1	254190	2085314	2352670	787357	2077217	761615	1343635	722150	957960	1	297542	730525	1529633	432707	1083532	1167188	1708664	519084	511062	1387032	1278091	1288540	(137.0751, 74.51)(114.0572, 70.49)(120.07428, 166.85251)(152.1087, 167.51001)(159.06776, 722.87695)(139.04913, 17306.498)(140.10052, 2717.3264)(141.05434, 895.63776)
CPD-12222	&alpha;-fenchene	2186401	1329968	1996267	2322893	1	2639633	1	1135802	2121375	2230632	1999967	2333651	1004147	1244638	1220575	1524323	1524566	2407970	1451381	2128315	2236001	1165523	1100293	930758	(137.13138, 3260.1282)(159.1158, 46785.777)(160.11879, 4843.008)
CPD-4889	(<i>E</i>)-&beta;-ocimene	2186401	1329968	1996267	2322893	1	2639633	1	1135802	2121375	2230632	1999967	2333651	1004147	1244638	1220575	1524323	1524566	2407970	1451381	2128315	2236001	1165523	1100293	930758	(137.13138, 3260.1282)(159.1158, 46785.777)(160.11879, 4843.008)
CPD-4888	&beta;-myrcene	2186401	1329968	1996267	2322893	1	2639633	1	1135802	2121375	2230632	1999967	2333651	1004147	1244638	1220575	1524323	1524566	2407970	1451381	2128315	2236001	1165523	1100293	930758	(137.13138, 3260.1282)(159.1158, 46785.777)(160.11879, 4843.008)
CPD-4886	(4<i>S</i>)-limonene	2186401	1329968	1996267	2322893	1	2639633	1	1135802	2121375	2230632	1999967	2333651	1004147	1244638	1220575	1524323	1524566	2407970	1451381	2128315	2236001	1165523	1100293	930758	(137.13138, 3260.1282)(159.1158, 46785.777)(160.11879, 4843.008)
CPD-4894	(+)-&alpha;-thujene	2186401	1329968	1996267	2322893	1	2639633	1	1135802	2121375	2230632	1999967	2333651	1004147	1244638	1220575	1524323	1524566	2407970	1451381	2128315	2236001	1165523	1100293	930758	(137.13138, 3260.1282)(159.1158, 46785.777)(160.11879, 4843.008)
CPD-4890	terpinolene	2186401	1329968	1996267	2322893	1	2639633	1	1135802	2121375	2230632	1999967	2333651	1004147	1244638	1220575	1524323	1524566	2407970	1451381	2128315	2236001	1165523	1100293	930758	(137.13138, 3260.1282)(159.1158, 46785.777)(160.11879, 4843.008)
CPD-4892	(-)-&alpha;-pinene	2186401	1329968	1996267	2322893	1	2639633	1	1135802	2121375	2230632	1999967	2333651	1004147	1244638	1220575	1524323	1524566	2407970	1451381	2128315	2236001	1165523	1100293	930758	(137.13138, 3260.1282)(159.1158, 46785.777)(160.11879, 4843.008)
CPD-4891	(-)-&beta;-pinene	2186401	1329968	1996267	2322893	1	2639633	1	1135802	2121375	2230632	1999967	2333651	1004147	1244638	1220575	1524323	1524566	2407970	1451381	2128315	2236001	1165523	1100293	930758	(137.13138, 3260.1282)(159.1158, 46785.777)(160.11879, 4843.008)
CPD-4921	(-)-camphene	2186401	1329968	1996267	2322893	1	2639633	1	1135802	2121375	2230632	1999967	2333651	1004147	1244638	1220575	1524323	1524566	2407970	1451381	2128315	2236001	1165523	1100293	930758	(137.13138, 3260.1282)(159.1158, 46785.777)(160.11879, 4843.008)
CPD-4903	(<i>Z</i>)-&beta;-ocimene	2186401	1329968	1996267	2322893	1	2639633	1	1135802	2121375	2230632	1999967	2333651	1004147	1244638	1220575	1524323	1524566	2407970	1451381	2128315	2236001	1165523	1100293	930758	(137.13138, 3260.1282)(159.1158, 46785.777)(160.11879, 4843.008)
CPD-4901	(+)-2-carene	2186401	1329968	1996267	2322893	1	2639633	1	1135802	2121375	2230632	1999967	2333651	1004147	1244638	1220575	1524323	1524566	2407970	1451381	2128315	2236001	1165523	1100293	930758	(137.13138, 3260.1282)(159.1158, 46785.777)(160.11879, 4843.008)
CPD-4902	tricyclene	2186401	1329968	1996267	2322893	1	2639633	1	1135802	2121375	2230632	1999967	2333651	1004147	1244638	1220575	1524323	1524566	2407970	1451381	2128315	2236001	1165523	1100293	930758	(137.13138, 3260.1282)(159.1158, 46785.777)(160.11879, 4843.008)
CPD-8754	(+)-&alpha;-pinene	2186401	1329968	1996267	2322893	1	2639633	1	1135802	2121375	2230632	1999967	2333651	1004147	1244638	1220575	1524323	1524566	2407970	1451381	2128315	2236001	1165523	1100293	930758	(137.13138, 3260.1282)(159.1158, 46785.777)(160.11879, 4843.008)
CPD-8755	(+)-&beta;-pinene	2186401	1329968	1996267	2322893	1	2639633	1	1135802	2121375	2230632	1999967	2333651	1004147	1244638	1220575	1524323	1524566	2407970	1451381	2128315	2236001	1165523	1100293	930758	(137.13138, 3260.1282)(159.1158, 46785.777)(160.11879, 4843.008)
CPD-8756	(+)-3-carene	2186401	1329968	1996267	2322893	1	2639633	1	1135802	2121375	2230632	1999967	2333651	1004147	1244638	1220575	1524323	1524566	2407970	1451381	2128315	2236001	1165523	1100293	930758	(137.13138, 3260.1282)(159.1158, 46785.777)(160.11879, 4843.008)
CPD-8736	&gamma;-terpinene	2186401	1329968	1996267	2322893	1	2639633	1	1135802	2121375	2230632	1999967	2333651	1004147	1244638	1220575	1524323	1524566	2407970	1451381	2128315	2236001	1165523	1100293	930758	(137.13138, 3260.1282)(159.1158, 46785.777)(160.11879, 4843.008)
CPD-8735	&alpha;-terpinene	2186401	1329968	1996267	2322893	1	2639633	1	1135802	2121375	2230632	1999967	2333651	1004147	1244638	1220575	1524323	1524566	2407970	1451381	2128315	2236001	1165523	1100293	930758	(137.13138, 3260.1282)(159.1158, 46785.777)(160.11879, 4843.008)
CPD-8785	(<i>4R</i>)-limonene	2186401	1329968	1996267	2322893	1	2639633	1	1135802	2121375	2230632	1999967	2333651	1004147	1244638	1220575	1524323	1524566	2407970	1451381	2128315	2236001	1165523	1100293	930758	(137.13138, 3260.1282)(159.1158, 46785.777)(160.11879, 4843.008)
CPD-8768	(-)-&beta;-phellandrene	2186401	1329968	1996267	2322893	1	2639633	1	1135802	2121375	2230632	1999967	2333651	1004147	1244638	1220575	1524323	1524566	2407970	1451381	2128315	2236001	1165523	1100293	930758	(137.13138, 3260.1282)(159.1158, 46785.777)(160.11879, 4843.008)
CPD-8767	(+)-camphene	2186401	1329968	1996267	2322893	1	2639633	1	1135802	2121375	2230632	1999967	2333651	1004147	1244638	1220575	1524323	1524566	2407970	1451381	2128315	2236001	1165523	1100293	930758	(137.13138, 3260.1282)(159.1158, 46785.777)(160.11879, 4843.008)
HYDRPHENYLAC-CPD	(4-hydroxyphenyl)acetaldehyde	3811490	3704417	3230475	3881610	4237524	3825975	4019485	4214341	4538081	3426271	4131693	4027740	3063502	3097272	3626021	3459090	3116976	3114238	3681817	3922449	3219242	4325817	5290810	4919927	(137.6367, 3422.1084)(139.3965, 1985.3932)(140.0652, 1579.06)(137.05983, 5514.8833)(139.0492, 593.08)(121.0564, 4808.414)(154.08525, 39035.71)(155.08743, 3764.847)(156.07901, 231.16501)(136.0743, 106853.164)(159.0447, 535.77)(143.03535, 7069.1855)
CPD-6441	methyl benzoate	3811490	3704417	3230475	3881610	4237524	3825975	4019485	4214341	4538081	3426271	4131693	4027740	3063502	3097272	3626021	3459090	3116976	3114238	3681817	3922449	3219242	4325817	5290810	4919927	(137.6367, 3422.1084)(139.3965, 1985.3932)(140.0652, 1579.06)(137.05983, 5514.8833)(139.0492, 593.08)(121.0564, 4808.414)(154.08525, 39035.71)(155.08743, 3764.847)(156.07901, 231.16501)(136.0743, 106853.164)(159.0447, 535.77)(143.03535, 7069.1855)
CPD-8779	3-methoxybenzaldehyde	3811490	3704417	3230475	3881610	4237524	3825975	4019485	4214341	4538081	3426271	4131693	4027740	3063502	3097272	3626021	3459090	3116976	3114238	3681817	3922449	3219242	4325817	5290810	4919927	(137.6367, 3422.1084)(139.3965, 1985.3932)(140.0652, 1579.06)(137.05983, 5514.8833)(139.0492, 593.08)(121.0564, 4808.414)(154.08525, 39035.71)(155.08743, 3764.847)(156.07901, 231.16501)(136.0743, 106853.164)(159.0447, 535.77)(143.03535, 7069.1855)
4-hydroxybenzoate	4-hydroxybenzoate	1077831	744937	697467	716869	1	405718	1	764736	654829	873622	644687	758635	265743	250440	263461	646261	543415	628721	258403	879777	718529	714433	703843	205842	(137.66278, 3772.361)(138.01836, 274.46)(124.02366, 819.4121)(139.83496, 4684.474)(121.694, 894.38495)(159.11342, 1339.894)(160.07053, 4529.086)(138.19005, 13953.034)(139.35083, 9093.392)(140.61081, 2688.5156)(141.05408, 1467.4275)(161.80263, 13434.774)(163.0174, 23261.95)(142.6927, 3433.8313)(145.00995, 1874.23)
ADENINE-RING	adenine-ring	17003308	101673832	15224420	116637808	117820304	110531576	109408736	89577824	105016088	17010516	106124104	102856240	64688272	66847244	63506920	133499400	106841120	104123992	106508312	111526208	104205264	54682060	52469312	53358824	(137.67398, 22896.525)(139.05606, 7304.202)(136.0614, 1355085.0)(137.06339, 86553.13)(154.08899, 53066.332)(155.30309, 6526.56)(157.0962, 89.38)(162.35104, 244.42998)
ADENINE	adenine	17003308	101673832	15224420	116637808	117820304	110531576	109408736	89577824	105016088	17010516	106124104	102856240	64688272	66847244	63506920	133499400	106841120	104123992	106508312	111526208	104205264	54682060	52469312	53358824	(137.67398, 22896.525)(139.05606, 7304.202)(136.0614, 1355085.0)(137.06339, 86553.13)(154.08899, 53066.332)(155.30309, 6526.56)(157.0962, 89.38)(162.35104, 244.42998)
L-THREONATE	L-threonate	1	1	1	1	1	1	755697	1	708643	1	1	205678	198229	1	1	1	1	1	1	1	1	1	129779	257395	(138.0391, 3256.225)(120.025696, 10968.26)(121.02655, 1227.445)(137.03833, 13937.063)(139.04155, 2698.655)(140.0455, 844.31)(119.02811, 62773.74)(154.7356, 1158.5834)(156.57095, 9413.442)(157.57382, 1438.55)(135.38678, 6145.394)(159.5214, 112.784996)(160.5227, 484.37)(161.0277, 907.1)(145.0179, 200.66)
HYPOXANTHINE	hypoxanthine	1	1	1	122070104	118319576	1	1	1	1	1	1	1	1	1	1	1	1	1	1	1	1	1	1	2003324	(138.03964, 11581.675)(119.0277, 144580.89)(121.0312, 157.93)(139.0489, 5211.44)(140.0553, 6214.15)(141.0541, 1791.83)(120.03713, 26031.406)(121.04193, 946.13007)(155.40584, 5292.987)(157.08224, 5432.6797)(159.0845, 92.78)(136.06136, 1195743.4)(137.0633, 109821.36)(161.0275, 741.41)
TYRAMINE	tyramine	115277104	99848880	103116400	133632080	164017920	127105352	94570912	72971816	72841544	67215424	68885168	68917200	42267600	37996452	41420772	224822096	187488176	183557424	98250368	99917608	101705440	19043768	18327124	19427888	(138.09048, 26637.111)(139.09117, 7653.6274)(120.08024, 2588110.8)(121.08303, 235420.0)(122.08534, 8186.614)(141.03487, 1256.5339)(122.09143, 5328.755)(126.1021, 183.83)(159.25706, 9114.368)(160.13173, 6824.295)(139.12193, 3383.9934)(161.95897, 7882.15)(163.0384, 10588.033)(163.99937, 14396.344)(144.66652, 2804.7544)(146.20787, 9108.84)(147.08597, 308.2067)
P-AMINO-BENZOATE	4-aminobenzoate	5837980	1148615	1	1	1	1249512	7546318	8153802	7921645	2589685	1805658	363021	3066908	3131798	2286992	8402045	7869480	7732700	1305344	18533188	1344415	6375000	6432252	1	(138.32994, 945.4721)(140.38235, 2559.7068)(141.0552, 184.36)(119.02927, 19104.219)(123.04435, 649.0614)(138.13116, 36951.25)(139.8056, 1554.6863)(141.55858, 2393.3584)(142.06067, 4388.61)(123.04576, 1793.0712)(156.9756, 5325.8975)(158.18214, 3560.849)(159.0886, 6276.0903)(136.06271, 104613.39)(137.06186, 14058.45)(163.03818, 41772.297)(164.04268, 3460.7937)
PHENYLGLYOXAL	phenylglyoxal	2083175	1712842	1844294	1401698	1798222	830481	4348290	4172721	3026307	1	3238347	3026532	8320644	7205903	6587170	1555019	323808	388491	1518190	1447975	2310194	6151539	5205164	5263200	(138.68393, 898.6609)(135.59314, 3897.7764)(139.0512, 851.92)(120.044174, 10537.012)(121.047, 164.26)(152.45126, 100003.48)(153.07164, 10383.557)(154.0682, 200.74)(134.05931, 21211.402)(135.06099, 598.18)(158.0338, 1011.4043)
3-DEAZAADENINE	3-deazaadenine	2765757	2529701	2349468	2742463	3023158	2729649	3431594	3338946	3265415	3119625	2828638	2711558	2861789	2866162	2867530	2499264	2243827	2192605	2678233	2736414	2720993	2739715	3995949	3779286	(138.73933, 1155.4138)(136.0742, 100268.81)(137.07591, 7448.531)(155.10411, 479.59998)(160.81177, 4331.0786)(161.0622, 3683.3733)
CPD-9024	allopurinol	18097654	99292584	1	122070104	118319576	116601120	109272496	91393344	107935408	1	105116056	1	1	1	1	1	1	1	1	1	1	1	1	2003324	(138.79422, 4193.265)(119.0277, 144580.89)(121.0312, 157.93)(139.0489, 5211.44)(140.0553, 6214.15)(141.0541, 1791.83)(119.33519, 35065.52)(120.37472, 1090.9255)(156.47818, 5019.189)(157.65388, 11792.889)(159.08392, 148.9075)(136.06134, 1432816.8)(137.0631, 99712.16)(161.0275, 741.41)
CPD-9023	2-hydroxypurine	18097654	99292584	1	122070104	118319576	116601120	109272496	91393344	107935408	1	105116056	1	1	1	1	1	1	1	1	1	1	1	1	2003324	(138.79422, 4193.265)(119.0277, 144580.89)(121.0312, 157.93)(139.0489, 5211.44)(140.0553, 6214.15)(141.0541, 1791.83)(119.33519, 35065.52)(120.37472, 1090.9255)(156.47818, 5019.189)(157.65388, 11792.889)(159.08392, 148.9075)(136.06134, 1432816.8)(137.0631, 99712.16)(161.0275, 741.41)
CPD-9017	8-hydroxypurine	18097654	99292584	15731738	122070104	118319576	116601120	109272496	91393344	107935408	18475868	105116056	105793408	67383824	68727936	66242776	136766224	109391080	106830712	104503576	1	106716736	56232700	57306328	2003324	(138.93425, 2666.3076)(141.047, 453.05)(119.02945, 82886.49)(121.0312, 157.93)(139.04903, 3674.312)(140.0553, 6214.15)(141.0541, 1791.83)(119.17093, 34006.92)(120.19892, 866.17413)(156.3818, 6505.012)(157.35883, 10958.509)(158.24992, 9546.845)(158.6823, 7195.1)(159.08344, 419.705)(136.06142, 1295338.4)(137.06339, 89081.18)(161.0275, 741.41)(141.01523, 185.62573)
CPD-4422	chromate	4004174	3159848	2378824	4007146	5458871	4294695	5702317	3551455	3332535	3331097	3271011	3327023	1	3274873	1	4440852	3436267	3319824	2196096	2406036	2373893	5269633	5286863	1	(138.9631, 1015.8208)(120.95285, 558.0308)(139.91394, 279169.94)
CARBAMOYL-P	carbamoyl phosphate	2453712	1980642	1989513	1947233	1585775	1758441	1621789	1867713	1870551	1929169	1874375	1963518	1924511	1886054	1737775	2483919	1951273	1962896	1871717	1905600	1939810	1831208	1876869	1800429	(138.96349, 11340.624)(121.04029, 663.94867)(125.9639, 8655.3)(144.9812, 800.93335)(122.963295, 12616.753)(126.971924, 631.34607)(157.00377, 10612.318)(142.58022, 115486.31)(143.5829, 89425.25)(143.99901, 19206.375)(165.96571, 262.29865)
ANTHRANILATE	anthranilate	1	1	1	1	6382777	1249512	1	1	1	1	1	363021	1	1	1	1	1	1	1	1	1	1	1	6449164	(139.0473, 4482.04)(141.0543, 4788.61)(119.030876, 16283.853)(123.0456, 1689.84)(138.38658, 61480.797)(141.0554, 1942.03)(142.0635, 6099.71)(120.0432, 770.3)(155.74379, 3988.68)(157.5811, 1434.885)(159.0839, 849.71)(136.06253, 107163.69)(137.06212, 9428.942)(163.0383, 40297.227)(164.043, 3695.155)
CPD-6483	chavicol	1788714	1663174	1686477	1320636	1359715	1375344	1700649	1478945	1610896	2115817	2186386	2211904	2584466	3002888	914831	1053567	989053	1121313	1066605	966526	948249	431256	3368429	4086588	(139.08528, 1238.1672)(117.806076, 6370.863)(119.0708, 3751.3718)(120.74686, 12429.015)(121.0809, 7086.9)(137.71463, 9473.863)(117.672264, 36890.785)(121.0819, 9379.273)(152.10567, 7172.8804)(153.1017, 1162.1133)(134.09552, 37315.87)(135.09592, 4698.218)(136.1094, 168.29)(159.27834, 1780.5975)(160.37662, 4200.321)(161.40643, 3932.687)(162.07465, 312.375)(139.1342, 3981.8757)(142.0618, 4266.98)
CINNAMYL-ALC	cinnamyl alcohol	1788714	1663174	1686477	1320636	1359715	1375344	1700649	1478945	1610896	2115817	2186386	2211904	2584466	3002888	1	1053567	989053	1121313	1066605	966526	948249	1	3368429	4086588	(139.08528, 1238.1672)(117.87643, 6939.918)(119.07086, 3580.006)(120.74686, 12429.015)(121.0809, 7086.9)(137.95398, 10156.962)(117.672264, 36890.785)(121.0819, 9379.273)(152.10544, 6694.2217)(153.1014, 155.46)(134.0955, 39834.785)(135.09592, 4698.218)(136.1094, 168.29)(159.29773, 1908.4703)(160.40543, 3845.524)(161.40643, 3932.687)(162.07465, 312.375)(139.0506, 4219.48)
CPD-9933	<i>trans</i>-anol	1788714	1663174	1686477	1320636	1359715	1375344	1700649	1478945	1610896	2115817	2186386	2211904	2584466	3002888	1	1053567	989053	1121313	1066605	966526	948249	1	3368429	4086588	(139.08528, 1238.1672)(117.87643, 6939.918)(119.07086, 3580.006)(120.74686, 12429.015)(121.0809, 7086.9)(137.95398, 10156.962)(117.672264, 36890.785)(121.0819, 9379.273)(152.10544, 6694.2217)(153.1014, 155.46)(134.0955, 39834.785)(135.09592, 4698.218)(136.1094, 168.29)(159.29773, 1908.4703)(160.40543, 3845.524)(161.40643, 3932.687)(162.07465, 312.375)(139.0506, 4219.48)
CPD-7616	3,4-dihydroxybenzaldehyde	978150	771753	570892	1080930	1231343	999746	795873	993006	786221	719832	741759	719720	5460793	2739013	467038	960808	702070	706188	684621	723362	687027	1076250	1133061	530728	(139.36974, 1451.4667)(121.52385, 3052.2002)(122.0245, 226.06)(139.04083, 3593.6765)(124.03849, 11152.874)(157.32068, 1943.865)(138.0541, 80529.58)(139.10423, 6736.453)(164.0261, 628.63)(144.13869, 8619.323)(146.35326, 19948.537)
CPD-9501	3-methoxy-5-hydroxytoluene	1772597	1467397	782547	857397	1488383	1	847261	327734	986541	683437	339409	755276	1825053	2175484	1736703	1197985	1218446	1	810922	745837	1339768	1218324	1281049	6586483	(139.8703, 19168.736)(140.40396, 13659.692)(121.7659, 8536.842)(123.78052, 2250.9812)(125.0719, 5178.27)(141.91737, 29538.674)(143.0871, 3073.708)(121.638054, 10803.198)(122.06215, 500.41)(156.27776, 3054.442)(157.1006, 363.1133)(138.0907, 19956.041)(139.08687, 2838.591)(162.76404, 19266.842)(164.00652, 11269.0)(164.56944, 4840.6416)(144.78566, 23839.508)(146.12383, 22440.982)(147.16937, 4063.516…
SELENATE	selenate	1	1	1	1	1	1	259486	72062	72762	1	1	1	150175	65951	1	1	1	1	1	1	96623	112766	295084	1	(139.91425, 155061.73)(174.89523, 22580.36)
HOMO-CYS	L-homocysteine	3393260	2726212	2684228	3008675	1890790	2702413	1	2544475	2366874	2740593	2792211	2728591	1495100	1535770	1771624	3626134	2810970	3099935	3125331	3021412	3046429	1524670	1150023	1	(139.94347, 7365.6045)(121.02415, 2163.9727)(122.02372, 2397.1538)(139.44469, 751.488)(119.03447, 43567.36)(155.38808, 6059.485)(136.06139, 1551853.1)(138.0545, 52501.75)(139.05492, 5409.8726)(141.61494, 276.492)(145.0112, 356.35)
CPD0-1457	ethyleneglycol phosphate	963906	739310	750084	748969	88039	212989	145555	179974	713694	750790	769613	710072	750890	793921	803903	1000788	582863	768079	743932	1	791840	758046	738550	760909	(139.98561, 7909.246)(140.98532, 985.775)(125.98517, 22806.55)(126.9913, 65.63)(143.00069, 185839.95)(144.479, 9433.997)(145.00475, 4061.4827)(126.99387, 301.82)(158.38513, 535.5614)(160.90161, 1187.8661)(161.0271, 768.96)(143.01552, 270.47668)(163.11101, 662.5221)(163.97691, 741.8133)(146.9747, 310.29)
2-AMINO-4-CARBOXYPYRIMIDINE	2-amino-4-carboxypyrimidine	1130282	871664	861501	206556	1117174	1066392	869030	1	897569	1301894	1566416	389729	3327512	1	3537072	1085357	686940	782446	802176	794398	729570	1231221	2284051	692826	(140.03487, 6845.5)(122.02313, 5955.623)(139.04071, 4045.1538)(156.06741, 2232.898)(138.05406, 78887.234)(139.05707, 7098.0337)(164.0273, 439.73)(144.16379, 8559.97)(145.01425, 654.705)
CPD0-1467	gabaculine	1084737	1062133	1266232	951324	921916	982544	844376	1058816	866653	382124	359716	522735	1370629	2674801	1455151	261887	290576	410457	1418295	924051	359924	5630332	5341107	5697131	(140.06706, 18133.39)(141.0696, 2792.0312)(123.55592, 22525.969)(140.29234, 47806.14)(141.07033, 4053.1602)(142.0624, 162.81)(122.06032, 8934.819)(158.68361, 5792.8696)(160.67711, 1186.21)(162.1137, 960.74)(142.63727, 3244.6853)(163.61816, 1921.7561)(163.0575, 129.28)(145.48694, 8927.088)(148.05054, 252.8725)
CPD-14650	(2<i>E</i>,4<i>E</i>,6<i>E</i>)-7-hydroxy-4-methylhepta-2,4,6-trienal	1772597	1467397	782547	1	1	1	847261	327734	1	683437	339409	755276	1825053	2175484	1736703	1	1	1	1	1	1	1	1	6586483	(140.06953, 24918.064)(141.0727, 5202.93)(121.64324, 9066.048)(123.78052, 2250.9812)(125.0719, 5178.27)(142.08525, 44037.797)(143.0871, 3073.708)(122.159355, 14079.147)(156.10107, 866.079)(157.0962, 48.99)(138.09056, 21742.89)(139.08687, 2838.591)(163.39894, 8674.554)(164.76834, 14109.919)(165.3179, 7026.4175)(144.63182, 30467.865)(145.78299, 27521.63)(147.18279, 4289.0767)(147.55722, 1054.5775)(…
CPD3O-4151	4-tyrosol	1772597	1467397	782547	1	1	1	847261	327734	1	683437	339409	755276	1825053	2175484	1736703	1	1	1	1	1	1	1	1	6586483	(140.06953, 24918.064)(141.0727, 5202.93)(121.64324, 9066.048)(123.78052, 2250.9812)(125.0719, 5178.27)(142.08525, 44037.797)(143.0871, 3073.708)(122.159355, 14079.147)(156.10107, 866.079)(157.0962, 48.99)(138.09056, 21742.89)(139.08687, 2838.591)(163.39894, 8674.554)(164.76834, 14109.919)(165.3179, 7026.4175)(144.63182, 30467.865)(145.78299, 27521.63)(147.18279, 4289.0767)(147.55722, 1054.5775)(…
HEXANOATE	hexanoate	3824444	3312254	3393333	5309173	5642134	5022857	2655568	3058250	3040201	2175062	2321782	2399570	1553988	1546662	1427150	7070195	5794512	1	2930825	2735628	2901302	492268	486038	488930	(140.06966, 44834.137)(142.41104, 3463.0715)(143.0807, 3364.1533)(100.0752, 7382.04)(117.908325, 61340.86)(119.08865, 1989.3562)(134.11526, 3486.283)(118.08552, 43290.38)(119.0883, 5686.26)(121.36363, 8514.849)(125.0721, 154.74)
HMP	4-amino-2-methyl-5-pyrimidinemethanol	390590	372520	397612	852672	157811	172889	565280	529375	531682	571367	579302	527124	64147	121474	488090	590062	394889	527869	801626	720549	443448	1220130	1161840	1211330	(140.2432, 4525.1655)(143.0809, 6235.87)(121.06442, 10002.836)(122.0622, 449.37784)(142.0843, 31428.695)(143.08833, 9398.923)(124.07544, 63123.605)(125.07644, 12245.448)(158.7032, 2145.7207)(159.1123, 3153.4602)(141.10146, 929.32837)(163.19862, 17154.479)(165.06903, 3594.3718)(166.73987, 41857.504)(146.22548, 20883.865)(147.64508, 1157.0466)(148.63428, 2132.1272)(149.06131, 257.08)
CPD-12224	&alpha;-fenchocamphorone	3635311	5257677	4173447	5425212	9124362	1	4887506	7198187	6717822	5290763	1	4849651	5005214	4732195	4771468	5107235	1	1	4535996	1	5824629	2268820	2582559	1978778	(140.42352, 3783.3523)(141.11163, 2246.4263)(142.12166, 140283.69)(143.1248, 13008.92)(156.1371, 78858.734)(157.14029, 8143.9375)
CPD-8685	(3Z,6Z)-nonadienal	3635311	5257677	4173447	5425212	9124362	1	4887506	7198187	6717822	5290763	1	4849651	5005214	4732195	4771468	5107235	1	1	4535996	1	5824629	2268820	2582559	1978778	(140.42352, 3783.3523)(141.11163, 2246.4263)(142.12166, 140283.69)(143.1248, 13008.92)(156.1371, 78858.734)(157.14029, 8143.9375)
P-NITROPHENOL	4-nitrophenol	850192	1001164	3689402	4463509	799823	457304	1	603064	985818	219968	829268	942044	6576954	730659	1	1	611717	1	874056	1	258317	1310652	910666	505754	(140.52591, 9760.375)(123.352295, 1288.3334)(142.86714, 33490.29)(144.03777, 2011.6328)(124.773575, 1843.7775)(159.5179, 2159.7673)(160.26321, 4210.5757)(161.0612, 14526.73)(139.20374, 6118.1396)(141.54898, 9675.372)(142.04971, 12119.827)(163.01743, 27552.582)(143.00119, 68833.19)
CPD-12491	phenylmethanesulfenate	339657	2956892	1883999	1070719	137842	3601386	578986	498291	539454	533179	509447	549261	1046564	1029206	1026721	222116	3076359	151975	3018248	1382817	2901556	239401	249836	162460	(140.657, 520.6588)(142.36848, 15764.902)(144.03764, 1905.8229)(125.88699, 187281.2)(127.5239, 44884.855)(159.11926, 1389.0343)(160.6882, 1785.0875)(161.72862, 520.97)(162.0663, 246.37)(141.09436, 11087.3545)(143.14026, 57593.465)(163.4944, 9685.053)(145.00552, 3755.4448)
ARSENATE	arsenate	1	1	1	1	1	1	5707548	1	1	1	1	1	1	1	1	1	1	1	1	1	1	1	1	1	(140.9115, 401.35)(141.9119, 62023.67)
CPD-18238	carboxyphosphate	1280407	1026972	1058010	1152462	1114839	1049346	1098741	1019431	632229	291047	253197	1101522	1066620	465974	1085170	591782	1037510	995322	1073016	1092126	1069198	341788	1085916	1070070	(140.95267, 13268.171)(142.7701, 45796.457)(143.7698, 3594.988)(143.96011, 3178.915)(141.11037, 30216.688)(142.9613, 6494.107)(126.95925, 90.06)(159.9895, 2120.813)(160.98825, 83.15)(144.98117, 761.5064)
PHOSPHORYL-ETHANOLAMINE	<i>O</i>-phosphoethanolamine	344813	1	1	1	155962	134552	619983	523311	546730	572035	518667	549446	1124744	1096830	1063225	1	161436	1	1	1	1	2211152	2216573	2291827	(141.01534, 78.06)(160.73949, 2393.2307)(162.518, 2450.996)(163.05553, 864.52716)(140.47263, 8541.684)(144.0456, 180.99)(145.0489, 10749.43)(167.0123, 35.26)
CPD-13578	aminomethylpyrimidine	2133243	1903292	2119568	396822	928898	408083	3400863	3025632	3109453	2516644	1	2683740	1343415	804581	1233573	779149	176527	373370	701309	2167502	668275	1266760	778784	957127	(141.10114, 7366.393)(140.1062, 397.86)(157.13254, 2529.6575)(162.08958, 55283.76)(163.09389, 5376.8623)(164.10686, 558.068)
CPD-14516	5-hydroxy-&gamma;-coniceine	1307735	1	4558430	11245756	1736085	451901	14310542	13903023	13755530	6723043	6836927	10859670	481150	4650595	3071589	485508	1	5208961	583135	1	1217607	4215650	4479516	3630834	(141.11165, 2070.214)(142.12172, 143382.5)(143.12486, 13288.238)
CPD-9739	&beta;-methylenecyclopropyl pyruvate	2338479	1713985	1662868	228528	220517	212438	158987	1697412	192174	1967194	236146	680476	393344	407214	1565684	778397	605004	1343360	1712623	1704022	212592	574172	585227	616789	(141.54732, 3736.1836)(143.0493, 448.42)(121.40485, 6428.873)(140.78464, 1779.6406)(142.33505, 1053.7242)(143.05225, 329.2725)(123.585075, 25475.57)(124.41481, 8732.012)(126.0462, 59.57)(159.24644, 11957.836)(158.87508, 1449.6327)(159.06802, 966.6843)(139.97101, 24384.953)(141.0686, 3893.984)(143.0722, 25885.52)(165.03226, 479.52713)(166.034, 580.29)(146.70625, 116510.25)(148.02501, 13437.727)
CPD-10206	(2E)-2-ethylidene-4-hydroxy-5-methyl-3(2H)-furanone	3383266	816977	5190168	1321782	1227915	1493535	1780909	2748212	2998631	1732850	704300	1184186	1583992	1813935	1561514	2718473	728840	2656164	964122	978555	727564	3102480	4440950	4297554	(141.62108, 4409.5947)(142.0511, 5732.75)(124.03887, 26974.844)(125.328896, 21739.213)(127.0486, 81093.3)(142.81194, 4202.0425)(124.29894, 31696.938)(127.057396, 9229.796)(159.8219, 4101.551)(161.23036, 1074.8472)(160.0747, 612.72)(140.73732, 28923.38)(141.07228, 6695.1797)(163.945, 44191.67)(164.27788, 4218.466)(165.05276, 213.64333)(148.03699, 603.3833)
CPD-9494	3,5-dihydroxyanisole	1	1	1	1	1227915	1	1780909	1	1	1	1	1	1583992	1813935	1561514	1	1	1	1	1	1	1	4440950	4297554	(142.04944, 9320.526)(124.03911, 74773.05)(125.328896, 21739.213)(127.0486, 81093.3)(144.0657, 6539.0854)(125.19567, 96617.0)(127.057396, 9229.796)(160.08463, 9811.423)(159.08345, 257.145)(160.0747, 612.72)(140.06987, 83232.29)(141.0729, 7988.0986)(167.79958, 362.705)(168.0481, 513.62)
CPD-17446	diethyl thiosulfinate	120616	17487480	11664033	2438290	21126432	1	2390449	1450199	300951	230103	14461114	1	9192197	15467949	15468290	827040	1977011	2665691	15477840	2246102	4349254	5798956	1004123	5035995	(142.06967, 356.0069)(143.01505, 435.796)(143.0171, 463.92)(158.54803, 3520.2488)(140.90192, 8422.132)(142.37059, 12606.601)(143.99985, 18186.521)(146.99234, 754.86005)
CPD-9699	hypoglycin A	2083022	3269141	2093332	2857546	2835973	3292589	2902654	2217176	3689540	1175332	5174012	2887001	3356912	4144102	4316961	1	5817338	5596715	3086248	2596169	4021595	3552595	8478080	11697302	(142.08502, 7174.318)(143.0819, 2545.2366)(142.33598, 15303.848)(143.08759, 1823.5582)(124.07502, 47938.99)(125.073364, 7263.034)(160.75177, 3457.8196)(141.48685, 1174.8993)(164.06879, 12890.312)(165.06596, 2236.879)(146.05797, 46823.348)(147.0619, 8150.8276)(148.06021, 718.4601)
HISTIDINAL	histidinal	2022397	1685607	1750821	1080534	1627652	1540034	1740815	1406081	1252881	1672710	1686138	1727674	341825	341485	1117844	2103755	1691581	1739749	1811959	1774117	1685565	612808	618392	1439654	(142.0853, 36852.855)(143.087, 3136.6082)(124.07488, 43460.63)(125.07698, 10965.567)(127.0843, 194.98)(144.10056, 19230.352)(126.08956, 258.8)(158.11667, 20652.549)(159.11694, 1281.2329)(160.1043, 2345.56)(141.10927, 104.12667)(163.88734, 9822.265)(166.74525, 42053.3)(167.0807, 16119.38)(147.97865, 8621.595)(149.01257, 5979.962)(149.0673, 1763.27)
CPD-7995	hygrine	192796	1481347	262175	219427	1146554	450059	309274	246581	147634	945006	7788103	302237	1772868	242618	359789	612630	153462	142516	451077	2166442	1354866	4154972	198476	1	(142.12178, 117017.52)(143.12491, 10878.928)
CPD-10660	3-chlorobenzaldehyde	3396775	244321	11372018	1038824	2830361	1266272	1	1	1	1925048	8418747	2428678	3697334	1	1047262	747092	8600498	2536627	2405934	149150	219944	1	1	5515253	(143.00081, 193689.84)(144.00339, 12422.896)(145.007, 3463.93)(121.994354, 472.79)(147.24542, 172534.3)(148.02512, 11628.99)(130.01439, 1153.3583)(161.28821, 1618.9749)(145.03363, 12608.364)(146.03575, 2397.5527)(168.33229, 1950.4966)(144.98189, 1114.3418)
CPD-12490	(<i>Z</i>)-phenylmethanethial <i>S</i>-oxide	1216223	1022256	996800	506244	1	913123	809162	875213	1	1	1	1	932273	925091	656288	1308119	946684	864397	740930	850832	967942	764899	950161	925020	(143.01535, 237.96799)(160.71683, 3064.5178)(141.35179, 8512.462)(142.03767, 10515.298)(143.0366, 18859.79)(160.99913, 6016.528)(143.99872, 18483.877)(146.99344, 341.76926)
2-OXO-5-METHYLTHIOPENTANOIC-ACID	5-(methylsulfanyl)-2-oxopentanoate	1	274922	274243	1	1	1	194264	157998	1	211944	1	1	137190	130324	144538	1	262994	1	274635	286610	288900	323058	274821	255153	(143.01736, 12263.048)(144.01988, 1481.541)(145.01292, 781.04)(163.03893, 16019.637)(147.02257, 43821.598)(148.85658, 6629.7695)(149.0225, 5230.07)(179.86543, 1056.46)(162.0555, 1246.2933)(187.01852, 2907.969)
4-FLUOROBENZOATE	4-fluorobenzoate	1	3111494	2320627	1	1	1	1	1	3008275	1	1	3570930	1	709047	1	3660683	1	1	2428205	1	2622102	1	1788937	1852834	(143.0363, 11090.111)(124.023705, 689.25336)(161.06253, 100.55223)(161.86543, 186.828)(162.0655, 61.5)(142.04843, 855.542)(167.0176, 131.89)(143.99716, 13840.169)(145.0064, 51.96)
2-FLUOROBENZOATE	2-fluorobenzoate	2337305	3111494	2320627	2938929	1953092	1420083	3243000	3211607	3008275	1	2792920	3570930	1872009	709047	1	3660683	3058664	606082	2428205	3021121	2622102	1	1788937	1852834	(143.03639, 12180.422)(124.6924, 3057.1543)(160.74695, 278.80417)(161.96585, 163.764)(162.0655, 61.5)(142.04861, 912.3891)(167.01779, 93.386)(143.99739, 13602.983)(145.00618, 51.776363)
CPD-15778	5-(hydroxymethyl)-2-methyl-4(1H)-pyrimidinone	222827	161892	406313	445022	756511	729751	278414	242365	276159	484901	1	264675	1	446027	458521	686050	175860	238112	300202	450305	438673	2570325	2396490	2400312	(143.37137, 6735.219)(145.06927, 6597.298)(125.106445, 34136.19)(126.50175, 48280.973)(127.05869, 3840.192)(141.36891, 1825.3041)(142.0604, 189.38)(125.560524, 15014.437)(127.06644, 1146.23)(128.07043, 4858.1304)(158.27385, 8354.562)(159.09023, 983.0783)(142.08548, 16826.47)(143.08543, 6738.8696)(165.52803, 13446.865)(166.4517, 7156.038)(167.05415, 146.14)(146.89212, 6593.19)(147.61414, 808.3057)…
HISTIDINOL	histidinol	5204890	5086058	1	297137	1	30672032	17779504	10773098	8898893	1	9776129	6088171	1	4683718	280561	3685566	8687485	13013589	1900445	1	1693573	2252790	6371236	2475450	(144.10063, 13613.341)(124.08577, 32116.822)(125.0885, 338.07)(146.11613, 8148.6533)(160.13176, 487.6133)(142.12161, 137950.34)(143.12474, 12736.736)(165.83675, 1627.0428)(166.0888, 2851.52)
CPD-12846	(3<i>Z</i>)-hex-3-en-1-yl acetate	1	1	1	1	1	1	1	1	1	1	2194703	1	1	1	1	1	1	1	1	1	1492918	1	1	415717	(144.10081, 11501.163)(124.08597, 34395.457)(146.1164, 8537.89)(128.10619, 93810.41)(129.10866, 8501.91)(142.12187, 147791.73)(143.125, 13652.81)
CPD-9422	5-oxooctanal	698206	880119	208312	952830	4250487	825119	1	369051	315173	247480	2194703	317301	329951	244574	1881013	1	1	1	1	4551306	1	4522988	5058191	1	(144.10085, 13867.289)(147.1158, 51.45)(124.08591, 25442.713)(146.11632, 7874.6675)(128.1062, 81184.95)(129.1086, 6574.0703)(160.13165, 301.305)(142.1218, 121995.94)(143.12492, 11287.408)(165.08987, 5840.6567)(166.0886, 313.31)
CPD-14511	conhydrine	317000	1	294864	242139	281764	241294	279002	252716	245456	332255	333212	309615	1	1	1	217425	186309	163080	223088	246786	244828	1	1	1	(144.13712, 1067.2228)(146.16391, 3642.3938)(168.1361, 845.93)(149.82233, 6358.796)
CPD-14514	pseudo-conhydrine	317000	1	294864	242139	281764	241294	279002	252716	245456	332255	333212	309615	1	1	1	217425	186309	163080	223088	246786	244828	1	1	1	(144.13712, 1067.2228)(146.16391, 3642.3938)(168.1361, 845.93)(149.82233, 6358.796)
CPD-9428	conhydrine	317000	1	294864	242139	281764	241294	279002	252716	245456	332255	333212	309615	1	1	1	217425	186309	163080	223088	246786	244828	1	1	1	(144.13712, 1067.2228)(146.16391, 3642.3938)(168.1361, 845.93)(149.82233, 6358.796)
CPD-9423	8-aminooctan-4-one	317000	1	294864	242139	281764	241294	279002	252716	245456	332255	333212	309615	1	1	1	217425	186309	163080	223088	246786	244828	1	1	1	(144.13712, 1067.2228)(146.16391, 3642.3938)(168.1361, 845.93)(149.82233, 6358.796)
CPD-10201	homofuraneol	2408427	1992344	1976753	1414423	1618241	1309936	2225624	1987287	1809126	1876907	2132241	2046571	4695909	4355834	1	3478669	811891	794581	671248	2080112	714002	6646177	6196838	6620322	(144.22337, 53802.09)(145.34384, 5740.9263)(146.57455, 498.695)(125.925095, 65761.84)(127.43414, 2174.4924)(128.3142, 4342.265)(129.06796, 1378.19)(145.96698, 481.59778)(127.75112, 10539.561)(127.56785, 6947.255)(128.0688, 13202.36)(160.61905, 2642.9187)(164.1056, 285.56)(142.08533, 61530.125)(143.0858, 4506.6147)(166.58012, 19004.729)(168.50728, 4382.7983)(169.0612, 313.93)(149.78818, 88048.305)…
CPD-10214	mesifurane (enol form)	2408427	1992344	1976753	1414423	1618241	1309936	2225624	1987287	1809126	1876907	2132241	2046571	4695909	4355834	1	3478669	1	1	1	2080112	1	6646177	6196838	6620322	(144.22337, 53802.09)(145.34384, 5740.9263)(146.57455, 498.695)(126.055084, 78985.47)(127.7266, 1884.9575)(129.067, 242.58)(145.5789, 318.82498)(127.90065, 11091.073)(127.56785, 6947.255)(128.0688, 13202.36)(160.20137, 2475.8606)(164.1056, 285.56)(142.08533, 61530.125)(143.0858, 4506.6147)(166.9011, 21301.111)(168.50728, 4382.7983)(169.0612, 313.93)(150.36629, 101386.88)(152.05661, 257816.64)
CPD-6941	2-chloroethylphosphonate	3048394	1749103	214506	1	292497	212107	71714	142438	207255	296263	423933	1	197245	1	313117	3641557	160383	308952	1	186827	595414	1	75839	1	(144.46283, 4947.0347)(126.42845, 5993.51)(144.98053, 4233.9673)(146.9785, 19004.71)(125.96403, 9835.131)(126.96221, 396.985)(160.99901, 6955.649)(146.59135, 782.688)(146.9937, 1581.71)(166.95825, 618.355)(168.9559, 210.72)(150.3732, 4053.27)(151.9485, 177.02)
CPD-9778	acetonedicarboxylate	1108359	775695	1395311	1641466	2100970	1901341	2080011	1825658	1553900	1210606	480314	1154099	1270051	1417999	1409969	1986944	1590647	1164140	1438941	1225584	1613100	529073	1022635	1257353	(144.50528, 2853.808)(129.0028, 30391.246)(130.00607, 40313.008)(147.89879, 12246.16)(149.02295, 3521.823)(130.01012, 20067.19)(166.60757, 77.01444)(166.0533, 100.75)(145.03365, 3388.5007)(146.13632, 821.37305)(171.54596, 5655.114)(172.00513, 8310.189)(153.99397, 179.92)
2-KETOGLUTARATE	2-oxoglutarate	1108359	775695	1395311	1641466	2100970	1901341	2080011	1825658	1553900	1210606	480314	1154099	1270051	1417999	1409969	1986944	1590647	1164140	1438941	1225584	1613100	529073	1022635	1257353	(144.50528, 2853.808)(129.0028, 30391.246)(130.00607, 40313.008)(147.89879, 12246.16)(149.02295, 3521.823)(130.01012, 20067.19)(166.60757, 77.01444)(166.0533, 100.75)(145.03365, 3388.5007)(146.13632, 821.37305)(171.54596, 5655.114)(172.00513, 8310.189)(153.99397, 179.92)
CPD-9295	2-vinyl-[4H]-1,3-dithin	369247	244066	135411	407735	1	211576	558349	121682	220883	291336	262256	1	181991	170560	313649	187301	136805	139173	463861	400785	123669	1	145088	236563	(144.7554, 3052.61)(145.0119, 649.89)(166.03386, 2352.5542)(169.59572, 753.594)(170.99292, 579.76)
CPD-9296	3-vinyl-[4H]-1,2-dithin	369247	244066	135411	407735	1	211576	558349	121682	220883	291336	262256	1	181991	170560	313649	187301	136805	139173	463861	400785	123669	1	145088	236563	(144.7554, 3052.61)(145.0119, 649.89)(166.03386, 2352.5542)(169.59572, 753.594)(170.99292, 579.76)
THZ	5-(2-hydroxyethyl)-4-methylthiazole	226371	247961	1274055	285787	3985211	3500585	574870	589979	304270	802870	451993	1	978101	1187996	1	979325	1	299343	230083	286562	196555	576013	788832	693314	(144.79391, 3003.0925)(127.16646, 594.68713)(144.93753, 99652.35)(147.045, 6422.555)(127.0394, 76244.805)(128.0372, 823.43005)(161.88257, 8504.0205)(163.40233, 10605.3545)(165.07706, 101.55)(144.44449, 54002.008)(147.8128, 2502.7825)(148.0657, 3139.65)(170.4119, 4095.819)(171.0257, 29255.57)(149.02165, 853.61993)(153.01758, 2197.7825)
2-HYDROXY-4-CARBOXYPYRIMIDINE	2-hydroxy-4-carboxypyrimidine	129763	1721262	621954	1302928	2734669	1694523	893634	1	2784194	1578615	1429368	876013	203313	1867312	1881984	142905	703860	158368	547062	1	1051361	1575941	1766896	1508907	(145.03384, 2818.1768)(127.0238, 174413.28)(159.735, 38499.81)(160.8652, 10003.0625)(161.94922, 2994.8555)(140.6025, 3412.6416)(142.04773, 1341.34)(167.0172, 104.348)(144.19717, 9661.087)(145.00604, 105.994995)
ADIPATE	adipate	1817768	6737912	1639883	664124	1	670290	11936184	10901549	11348579	1647888	10589124	10719475	4226675	17046436	6973523	5748198	1	5968962	6057643	7886819	1041377	9117368	9765234	10284087	(145.04805, 53741.41)(148.05429, 540.835)(149.0574, 1191.83)(131.04253, 12811.942)(145.0491, 154778.36)(146.179, 18830.502)(147.05614, 713.79004)(127.44047, 78621.11)(128.444, 21113.541)(130.3846, 8589.903)(163.94434, 136264.5)(166.26802, 21341.033)(164.0735, 774.69)(144.06444, 40519.125)(146.07945, 512.135)(167.0309, 543.5)(149.69063, 44261.49)(151.02834, 6043.939)(151.0286, 321.11)
2-ACETO-2-HYDROXY-BUTYRATE	(<i>S</i>)-2-aceto-2-hydroxybutanoate	1	2156719	6981798	7680733	7883518	6118845	12284545	11525819	11576584	1	9289718	11061567	6971268	13755395	5506522	2901760	1	2823814	7915181	8133233	4565303	10175565	10540516	10300418	(145.0488, 141536.72)(146.05507, 19650.324)(147.0553, 1438.0288)(127.23169, 77984.73)(128.51424, 19127.875)(130.65007, 12939.99)(132.0524, 349.67)(146.05884, 9423.182)(128.63225, 7679.7134)(129.8839, 20243.879)(131.05727, 517.0234)(163.08461, 12181.664)(164.09325, 1039.545)(146.69464, 6722.51)(150.08826, 45282.742)(170.0974, 1363.274)(172.65408, 1858.1914)(173.0544, 3419.02)(153.0383, 89.75)
2-DEHYDROPANTOATE	2-dehydropantoate	1	2156719	6981798	7680733	7883518	6118845	12284545	11525819	11576584	1	9289718	11061567	6971268	13755395	5506522	2901760	1	2823814	7915181	8133233	4565303	10175565	10540516	10300418	(145.0488, 141536.72)(146.05507, 19650.324)(147.0553, 1438.0288)(127.23169, 77984.73)(128.51424, 19127.875)(130.65007, 12939.99)(132.0524, 349.67)(146.05884, 9423.182)(128.63225, 7679.7134)(129.8839, 20243.879)(131.05727, 517.0234)(163.08461, 12181.664)(164.09325, 1039.545)(146.69464, 6722.51)(150.08826, 45282.742)(170.0974, 1363.274)(172.65408, 1858.1914)(173.0544, 3419.02)(153.0383, 89.75)
INDOLE-3-CARBOXALDEHYDE	indole-3-carboxaldehyde	1	1	1	2967993	2438358	3151157	4816968	2524188	3534217	1	1	3377852	2936598	2849904	2678484	7646546	1	7269554	4773684	4979343	4034393	1	1	2188749	(145.04933, 11685.774)(130.04877, 1689.5549)(146.0594, 65889.45)(147.06155, 2591.7488)(148.0548, 133.78)(132.49107, 15662.227)(163.83652, 1475.2162)(145.3276, 3041.6418)(150.0918, 2558.67)(168.04506, 559.7681)(151.53674, 821.8767)
8-HYDROXYQUINOLINE	8-hydroxyquinoline	4907463	1	1	2967993	2438358	3151157	4816968	2524188	3534217	1	1	3377852	2936598	2849904	2678484	7646546	6895577	7269554	4773684	4979343	4034393	1	1	2188749	(145.04933, 11817.367)(130.04874, 1551.3406)(146.05939, 70562.914)(147.1621, 2661.173)(148.05534, 120.3)(132.56262, 16184.01)(163.97595, 1612.9489)(145.29955, 2960.226)(150.0918, 2558.67)(168.04503, 513.67926)(151.46558, 730.30286)
2-KETO-6-AMINO-CAPROATE	6-amino-2-oxohexanoate	1	1	1	1	1	1	1	1	1	1	1	1	1885967	2982828	2323090	1	1	1	1	1	2153549	1525955	1129471	4026584	(145.90886, 47577.375)(146.08026, 317.41333)(128.5639, 4584.615)(146.5834, 4469.42)(128.06938, 7884.2554)(129.0635, 787.01)(166.83206, 5086.1587)(167.11646, 4630.335)(148.3914, 8161.4688)(168.06473, 30538.615)(169.06392, 1797.9744)(150.77014, 97332.06)(153.0558, 46624.16)
CPD-16891	1-deoxymannojirimycin	1	1	1	1	2592641	1	1	1	1	1	1	1	1	1	2237495	1	1	1	1	1	1	3264825	3116595	2960507	(146.0798, 1450.16)(149.0957, 265.41998)(182.12482, 133059.53)(183.12595, 11827.084)(164.1118, 7048.0)(190.48825, 4734.514)(192.0983, 2249.49)(169.0671, 933.98)
ACETYLCHOLINE	acetylcholine	1561692	1	764011	248484	1	414476	821941	1	927408	2623518	6309016	6258089	1	3446209	3430884	333146	1	1699716	1999808	1194015	1	3481360	4167805	3010200	(146.11629, 8533.387)(128.10614, 89793.24)(129.10846, 7791.1084)(172.11504, 7307.5664)
CPD-9424	&gamma;-coniceine	1	1	1	224236	238584	222727	1	1	1	1	1	1	1	1	1	217425	186309	163080	1	1	1	1	1	1	(146.16406, 3109.6982)(149.11372, 9016.64)
CPD-6123	1-(3-aminopropyl)-pyrrolinium	645585	692712	703714	1196800	1581324	1426937	940312	760496	711957	361138	1	1	919279	925808	938832	2072518	1578565	1562137	398782	400455	393851	799314	904177	904076	(146.16423, 42846.33)(147.16718, 2790.4624)(129.13779, 8304.259)
CPD-14378	dehydrospermidine	572444	1	1	1066732	1709815	1271951	859210	669575	1	1	1	1	823797	842311	857444	1716803	1331168	1309947	1	1	1	827054	814126	719935	(146.16423, 52910.73)(147.16718, 2760.936)
ALLYSINE	(<i>S</i>)-2-amino-6-oxohexanoate	855911	701562	1	1	1131925	855112	1020464	813754	1040264	297945	496895	2039648	1885967	2982828	2323090	1544040	1549994	1530151	1341935	1	2153549	1525955	1129471	4026584	(146.27597, 16462.08)(146.32993, 870.935)(127.98723, 5946.6646)(129.06747, 4138.0537)(148.08656, 6652.8076)(128.06998, 8244.404)(129.06448, 986.3301)(166.21109, 10270.228)(165.40018, 4237.2686)(147.62859, 7871.0796)(148.56033, 1717.6582)(168.25632, 28072.982)(169.06538, 1797.3844)(151.47783, 122623.08)(153.05685, 14895.412)(154.0581, 946.4)
NIACINE	nicotinate	1	1	1	1	1	1	1	1	1	1	1	1	1	1	1	1	1	1	1	1	1	430069	577134	602032	(146.3521, 18054.537)(109.0283, 7206.7803)(122.02334, 8703.177)(123.0261, 318.86)(143.06384, 411.66)(130.00719, 9936.977)(126.054405, 25037.037)
NAPHTHOL	1-naphthol	2731211	3180062	2960929	3724422	2545355	3770979	10447119	8726239	9797862	8533577	7273822	1584950	5826218	5356307	5969082	6673271	6320828	6568534	2671723	2675070	2683554	3097757	3427037	3521635	(146.44165, 74917.516)(147.75827, 7085.146)(148.4019, 2406.2366)(130.06169, 9249.537)(131.0646, 404.81)(147.99702, 15730.733)(149.07477, 1058.5133)(150.0814, 935.68)(129.56207, 11955.609)(130.49403, 13690.974)(131.06615, 1289.19)(162.36832, 31883.455)(163.09357, 4772.1763)(164.10617, 374.98248)(144.07994, 126651.06)(145.08226, 14424.901)(146.08194, 915.025)(169.26155, 19961.975)(170.37642, 25537.…
CPD-10271	<i>N</i>-hydroxy-L-isoleucine	1245456	1540667	791686	1	882883	372300	1699794	1031895	236808	313134	808169	242933	824910	681698	1514776	651489	799329	723919	1	1480113	1361946	2589727	2645076	1670020	(146.70091, 6891.098)(147.07767, 712.3886)(128.93501, 7010.2827)(129.06569, 414.19836)(147.5674, 10097.32)(149.2942, 527.662)(130.156, 2430.539)(131.08383, 4433.336)(166.11987, 2548.0208)(169.1315, 103.61)(148.06447, 5603.4785)(149.39725, 1556.6428)(170.80139, 4502.8374)(173.0809, 2332.235)(174.0853, 1083.04)(151.69962, 18602.117)(153.31584, 2583.691)(155.07158, 793.14874)(156.07253, 2013.1366)
QUINOLINATE	quinolinate	1911278	1	1068879	1287462	1	1	1	1	1143420	1	1430593	1	1320880	1	1	1810790	1354556	1644051	1	1	1146734	1299330	1	1379526	(146.99352, 361.116)(167.01791, 99.02778)(152.01625, 162.01)(184.21034, 3215.885)(185.04037, 14627.936)(165.03157, 490.22598)(187.99327, 175.887)(169.98819, 15593.942)(170.99196, 1395.3534)
CPD-7050	2,4-pyridinedicarboxylate	1911278	1	1068879	1287462	1	1	1	1	1143420	1	1430593	1	1320880	1	1	1810790	1354556	1644051	1	1	1146734	1299330	1	1379526	(146.99352, 361.116)(167.01791, 99.02778)(152.01625, 162.01)(184.21034, 3215.885)(185.04037, 14627.936)(165.03157, 490.22598)(187.99327, 175.887)(169.98819, 15593.942)(170.99196, 1395.3534)
CPD-4841	dipicolinate	1911278	1	1068879	1287462	74028	1	1	1	1143420	209048	1430593	426094	1320880	1	373317	1810790	1354556	1644051	1	66571	1146734	1299330	406801	1379526	(146.99356, 1077.7769)(167.01755, 352.35355)(152.01625, 293.7375)(184.15454, 2998.6875)(185.04042, 13346.993)(165.03152, 1160.0568)(187.99315, 497.62628)(169.98819, 13171.876)(170.99196, 1300.9863)
R-2-HYDROXYGLUTARATE	(<i>R</i>)-2-hydroxyglutarate	31022862	29608100	710588	30848174	899941	1	7177454	1042626	1678397	1119505	1714769	1846970	331913	889290	730145	1	1	597418	1047042	966087	1708791	1	491435	517653	(147.02257, 221916.53)(148.02501, 14465.522)(151.03531, 9509.135)(130.6828, 520.10333)(149.03581, 2509.4832)(129.02069, 95655.67)(130.02107, 9432.207)(167.86325, 8895.092)(169.06924, 165.9625)(148.91066, 5811.4087)(172.01677, 207.30249)(173.02069, 129.01999)(155.38348, 3970.999)(155.00832, 1089.325)(156.00839, 5122.9746)
CPD-381	(<i>S</i>)-2-hydroxyglutarate	1	1	1	1	1	1	1	1	1	1	1	1	331913	1	730145	1	1	1	1	1	1	1	491435	517653	(147.02267, 35769.184)(131.01746, 639.98)(149.03581, 2509.4832)(168.06445, 10962.364)(169.06924, 165.9625)(150.0551, 8189.745)
ISATIN	isatin	3490802	2493298	5094162	2970672	4451396	5157166	4012375	4161895	3012588	4148375	7284223	7504786	2955676	3170364	3463405	5085832	4092708	3369623	8191053	3160955	4853523	3542902	3380794	3319010	(147.0315, 351.66)(129.02153, 202368.11)(130.02188, 9240.0205)(131.0357, 411.48)(151.54807, 509.71606)(131.03464, 1488.0625)(165.06923, 12874.062)(166.0706, 1875.1559)(167.06683, 567.5725)(147.0569, 7373.5405)(174.99113, 2283.393)(175.0352, 6412.43)(153.75201, 2062.3625)(155.01822, 1143.62)
CPD-674	cinnamate	641986	417482	409382	660011	1410537	865487	616312	336890	1	511558	568814	1	684778	154538	127671	1442688	766427	853418	513635	640909	550464	762985	1	744752	(147.04309, 17248.0)(148.04614, 1876.3342)(134.04532, 3103.8184)(149.90617, 4432.166)(150.05576, 8726.971)(134.34196, 5976.9688)(166.08347, 128329.05)(167.08386, 17575.436)(168.78996, 1940.1179)(148.35884, 6381.419)(149.47256, 7173.06)(150.0769, 239193.9)(151.08145, 21988.875)(155.74702, 1391.7616)
CPD-10470	dimethylsulfonio-2-hydroxybutanoate	11867282	1	10723800	12010071	1	11639473	15244983	8521122	5386144	1	4362082	1	7680240	7560491	7142926	16198607	13309447	12915372	1	6717430	1	11906104	5978327	11068514	(147.04324, 8375.976)(189.0377, 1973.8473)(190.0407, 179.43)(147.04488, 7130.8916)(182.08154, 220553.83)(183.08359, 22631.309)(184.08142, 651.715)(165.05562, 21408.752)(166.0533, 1155.59)(171.02518, 26551.004)(172.0287, 3207.548)(165.3572, 13360.181)(167.5774, 2398.12)
CPD-8131	2-naphthol	1	1	1	1	1	1	10447119	8726239	9797862	8533577	7273822	1	5826218	5356307	5969082	1	1	1	1	1	1	3097757	3427037	3521635	(147.06293, 6422.2114)(148.0675, 367.88)(130.0612, 6284.4272)(148.07399, 18407.205)(149.07477, 1058.5133)(150.0814, 935.68)(130.0618, 6435.38)(162.09035, 51043.773)(163.09357, 4772.1763)(164.10617, 374.98248)(144.07994, 117145.12)(145.08168, 14285.778)(146.08194, 915.025)(169.41599, 6965.6113)(170.28253, 13062.483)(171.06078, 994.3299)(152.5475, 2340.8767)(154.05086, 7709.127)
4-GUANIDO-BUTYRAMIDE	4-guanidinobutyramide	3805248	1038308	1610084	8636390	1469554	18961588	9567563	6843691	10566192	10425751	7977496	8871957	9388640	9167696	9474020	8122920	6678784	6758786	792043	4904192	8004442	3219190	2725989	2311153	(147.10834, 1582.1934)(129.10147, 4006.4902)(146.11623, 20042.748)(147.1173, 3484.4124)(148.1107, 192.745)(128.10602, 58439.33)(129.10794, 7594.2793)(168.1, 9119.223)(169.0953, 216.89)(151.42319, 68013.695)(152.42433, 8597.449)
LYS	L-lysine	739939	672701	651128	964616	1427309	1019045	712062	569649	555253	427669	413058	439029	182617	1	208020	1319974	979877	921664	356310	427570	405808	393178	351576	347345	(147.46098, 39731.203)(148.1143, 2613.122)(134.1163, 9402.561)(175.01761, 105448.6)(175.118, 54394.855)(154.0927, 83919.3)(156.10085, 4409.335)
3-UREIDO-ISOBUTYRATE	3-(carbamoylamino)-2-methylpropanoate	1498513	1	1435032	418008	1	479366	1115698	1069987	1121848	959517	1	1013192	3261163	1	3287187	3858145	638023	1	1057284	1	978971	318875	3100048	337475	(147.5184, 46180.684)(147.81557, 7999.4272)(129.5538, 1865.55)(147.99063, 15775.113)(149.07433, 1645.8776)(129.91939, 11316.856)(131.0664, 1228.275)(163.09387, 6153.8003)(164.10545, 397.69144)(145.082, 23758.518)(146.082, 1147.61)(169.10895, 75257.34)(170.05667, 29424.105)(173.0667, 1073.86)(151.7135, 2708.7634)
COUMARIN	coumarin	2491092	1271540	3255657	3117531	2618975	3369788	1953706	927649	785724	1185215	1020963	2831543	1692166	1490356	1662511	5919173	5759817	5598361	2301010	2488127	2162319	1	3564733	3125991	(147.81714, 844.9822)(149.7008, 6437.49)(164.06873, 13513.525)(165.06708, 3555.2788)(146.0593, 76335.08)(147.19218, 6821.2188)(148.05977, 388.07498)(171.02791, 1269.4642)
1-KETO-2-METHYLVALERATE	(<i>R</i>)-2,3-dihydroxy-3-methylpentanoate	2878613	1178111	2494708	3128086	1	1923880	1	1	1	1064970	1	2917002	1	1	10494308	1	1	1	933635	1134998	1	1	1	5763728	(147.92702, 7259.46)(149.06772, 3749.0117)(150.07628, 15099.216)(151.0786, 201.96)(129.05429, 3903.3086)(130.0487, 1193.18)(148.07187, 9084.41)(149.06714, 1211.7351)(130.0614, 16336.372)(131.06253, 851.084)(165.10107, 11196.159)(147.08902, 3892.9226)(170.31, 2552.3276)(171.06439, 804.415)(172.0594, 129.14)(154.0507, 7771.931)(155.05264, 1811.595)
L-PANTOATE	(R)-pantoate	2878613	1178111	2494708	3128086	1	1923880	1	1	1	1064970	1	2917002	1	1	10494308	1	1	1	933635	1134998	1	1	1	5763728	(147.92702, 7259.46)(149.06772, 3749.0117)(150.07628, 15099.216)(151.0786, 201.96)(129.05429, 3903.3086)(130.0487, 1193.18)(148.07187, 9084.41)(149.06714, 1211.7351)(130.0614, 16336.372)(131.06253, 851.084)(165.10107, 11196.159)(147.08902, 3892.9226)(170.31, 2552.3276)(171.06439, 804.415)(172.0594, 129.14)(154.0507, 7771.931)(155.05264, 1811.595)
CPD0-1262	2-mercaptosuccinate	6434739	4827481	937948	4668321	1421580	3884069	3593213	2293473	368437	4760952	4946144	4402217	4813724	4820916	4649151	6483479	4794910	5029054	4859080	1624803	4752058	4645801	211513	1	(147.98146, 1621.1008)(153.99385, 187.73364)(130.97726, 57074.45)(131.9791, 587.7847)(132.97208, 1545.0028)(167.0175, 71.68)(153.0095, 251.06)(175.14384, 2151.024)(175.91708, 6640.7344)(175.9764, 7394.04)
DIETHYLDITHIOCARBAMATE	diethyldithiocarbamate	1668815	1392537	1320591	1403197	1242275	1269081	1295956	1313872	1350245	1314415	1236563	1325280	1297390	1270869	1251182	1979732	1	1311802	1300896	1	1337130	1284347	1294388	1242191	(148.02496, 16067.968)(152.03462, 725.3173)(154.0258, 150.61)(169.64125, 3147.0803)(170.90039, 1678.4486)(171.38634, 921.37335)(173.2269, 243.67786)(177.00658, 97.80332)
4--FLUOROGLUTAMATE	4- fluoroglutamate	1	2047555	1	1	1	1	2349427	2193121	2172834	1	2139924	2431884	1379695	1347957	1679488	1	1	1	1532659	1	1	1	593313	552708	(148.03531, 931.2225)(166.0501, 25431.354)(167.04857, 1504.0243)(152.32611, 69132.18)(184.99963, 6140.922)(185.48528, 213.58801)(188.09174, 11385.859)(166.9892, 18151.55)(189.03777, 220.48334)(170.77495, 2148.5415)(174.0357, 184.16)
CPD-6364	HBOA	1	1	1	1	1	1	1	1	1	1	1	1	1382779	1341889	982168	1	1	1	1	1	1	627254	494018	630389	(148.03592, 1632.875)(151.0398, 1586.29)(166.05048, 11410.171)(167.045, 1109.5867)(150.29504, 7691.048)(183.078, 4884.972)(184.0831, 167.705)(165.06602, 6756.0015)(189.03821, 249.13)(171.02728, 3659.472)(174.0357, 184.16)
MEVALONATE	(<i>R</i>)-mevalonate	2878613	1178111	2494708	3128086	1	1923880	1	1	1	1064970	1	2917002	1	1	10494308	1	1	1	933635	1134998	1	1077760	2977209	5763728	(148.0702, 6449.5146)(149.35466, 3399.3987)(150.07628, 15099.216)(151.0786, 201.96)(129.2781, 3935.5286)(132.05907, 7478.096)(148.0725, 13316.194)(149.0689, 1017.6351)(130.0614, 16336.372)(131.06253, 851.084)(165.10081, 11358.214)(147.08893, 3440.1077)(170.22655, 4658.97)(171.06323, 583.9167)(172.0594, 129.14)(154.05046, 14997.745)(155.0522, 2154.0024)
CPDQT-428	indole-3-carbinol	2449084	2234782	1708939	4477429	1	3524423	1	1	1	491742	1	1585340	1	1291966	1432331	1	1	1	2441475	2254618	1	5077559	9349347	960898	(148.07236, 11686.315)(149.5767, 3216.6826)(129.72578, 8596.558)(148.07394, 17122.342)(149.06973, 922.838)(131.14954, 7822.47)(135.0818, 419.73)(165.30034, 7537.255)(148.23509, 8477.019)(152.10587, 472.00003)(170.05942, 29415.676)(171.06317, 3763.5664)(172.074, 220.685)(154.05048, 4012.644)(155.0524, 153.36)
PHE	L-phenylalanine	1	1	1	1	1	1	1	1	1	1	1	1	1	1	1	1	1	1	1	1	1	1298172	1381036	1347413	(148.073, 6747.605)(151.07655, 1565.55)(166.0854, 58671.746)(167.08563, 5990.683)(148.074, 7291.09)(167.10413, 526.84)(188.07173, 4194.217)(175.07587, 3038.8035)
GLUTAMIDE	D-glutamine	1638235	1	2065215	1	1	1	2204759	2091598	1489377	1	3001163	1	1243579	1150283	1436912	1	1	1	1324425	1	1	1075575	908013	1049156	(148.22618, 28969.623)(150.15385, 116282.79)(151.08203, 12152.526)(130.79224, 1214.2036)(132.0673, 1281.58)(133.07056, 623.86)(147.07718, 957.8319)(129.06525, 3055.5764)(164.60324, 8621.947)(146.0909, 35304.184)(147.0937, 734.86993)(169.65894, 366.094)(153.47041, 45949.996)(154.05534, 3795.495)
GLN	L-glutamine	1638235	1	2065215	414448	448301	674465	2204759	2091598	1489377	898117	3001163	635378	1243579	1150283	1436912	978226	731163	523996	1324425	465760	397698	1075575	908013	1049156	(148.22618, 28969.623)(150.15385, 116282.79)(151.08203, 12152.526)(131.00221, 1506.2273)(132.0673, 1281.58)(133.07056, 623.86)(147.07785, 765.1453)(129.06671, 4895.3154)(130.0725, 607.5025)(164.39865, 6016.3237)(147.3977, 25709.592)(149.40517, 791.2315)(151.1029, 151.71)(170.72821, 871.77466)(173.92563, 1018.62274)(174.0685, 525.08)(153.47041, 45949.996)(154.05534, 3795.495)
CPD-4863	<i>N,N</i>-dihydroxy-L-valine	475093	455894	472017	2070686	474264	2259920	139624	3370464	1	2563205	1241609	1217272	2835764	6155997	2896026	1185465	1243737	957066	278467	299028	596944	4983861	4899671	5636659	(148.45105, 8251.626)(151.0662, 5402.64)(130.04958, 58044.934)(131.05151, 4037.4968)(149.06895, 8162.6646)(132.8377, 4616.865)(135.56845, 22392.104)(136.0712, 25249.32)(168.36205, 11286.815)(170.10368, 6148.921)(171.1025, 249.4)(150.08838, 43614.914)(151.08876, 5612.559)(173.65607, 1374.4181)(174.05377, 2904.982)(175.05533, 327.465)(154.40576, 689.25916)(157.0489, 1368.91)
CPDQT-341	(<i>E</i>)-5-(methylsulfanyl)pentanal oxime	2462238	209325	2099337	4241516	2706872	3837524	2139115	479810	789803	664987	1455323	1971287	2515432	298612	2467985	3892590	3665895	2023896	2265187	2182736	2558565	245703	214619	1879703	(148.48207, 10921.576)(149.06834, 1637.0845)(130.15732, 10108.615)(133.75961, 11847.895)(134.05962, 10141.606)(149.84668, 4022.294)(151.0809, 371.4)(132.73328, 6289.201)(134.0654, 3438.74)(167.90158, 642.537)(168.10045, 1466.5)(149.34384, 8654.912)(150.09279, 1701.7074)(170.05968, 38621.773)(171.06317, 4482.7085)(172.07312, 439.96)(153.84158, 2351.34)(154.05, 10371.387)(155.7181, 409.59335)(157.0…
CPD-14592	(R)-3,4-dihydroxymandelonitrile	1	1	1	1740802	1256469	1387404	1	1	1	2414198	1	1	1382779	1341889	982168	222787	1	299201	1	1781316	1664907	627254	494018	630389	(148.63689, 1420.636)(151.0398, 1586.29)(166.6231, 17680.662)(167.93881, 1544.8633)(151.67549, 43186.047)(185.0821, 5355.0493)(186.08633, 4365.6636)(165.7833, 12911.984)(170.0802, 20185.17)(189.03821, 249.13)(170.93518, 3430.1165)(174.0357, 184.16)
ACETYLSERINE	<i>O</i>-acetyl-L-serine	687444	1156255	584271	1729998	1	1	1889610	1962974	2104861	1052626	1181313	738253	2331894	6081823	3270163	1549027	904689	1726969	589597	548754	456734	4462886	4566899	1560554	(148.79707, 9142.528)(150.91905, 2519.513)(151.39693, 9372.36)(151.0601, 1103.87)(133.45503, 1647.198)(148.61658, 2136.5212)(130.04918, 78366.29)(131.05219, 3804.1545)(168.86043, 34087.684)(167.0868, 57705.46)(169.0966, 12564.14)(147.55444, 11576.317)(151.08786, 11088.755)(173.16388, 1131.4565)(152.50058, 7625.5537)(153.03848, 787.282)
L-4-HYDROXYGLUTAMATE_SEMIALDEHYDE	L-4-hydroxyglutamate semialdehyde	687444	1156255	584271	1729998	858014	690238	1889610	1962974	2104861	1052626	1181313	738253	2331894	6081823	3270163	1549027	904689	1726969	589597	548754	456734	4462886	4566899	1560554	(148.96048, 8695.052)(150.91905, 2519.513)(151.39693, 9372.36)(151.0601, 1103.87)(133.45503, 1647.198)(148.51605, 2069.32)(130.04921, 72437.78)(131.0519, 3533.499)(168.7795, 30576.047)(168.09164, 29067.816)(169.0966, 12564.14)(147.5131, 10689.182)(151.08786, 11088.755)(173.50739, 968.66)(152.91711, 7289.816)(153.03848, 787.282)
CPD-12132	(<i>S</i>)-4-amino-4,5-dihydro-2-thiophenecarboxylate	6281154	5370563	5644910	347542	1	5261466	10047926	8569028	893035	1838742	9049311	9392334	1752321	1668234	1703610	2229206	1680922	1487496	6240342	6711511	5616931	5839875	881512	341407	(149.0215, 607.12)(130.007, 24156.941)(148.025, 16563.646)(149.02293, 3943.2898)(129.02046, 28412.953)(163.96744, 11998.5)(165.68817, 21487.455)(166.65244, 6862.475)(167.05254, 749.61334)(146.71202, 7054.1167)(171.50597, 6746.414)(173.00916, 70.015)(153.99365, 205.5)
PHENYLACETOTHIOHYDROXIMATE	(<i>Z</i>)-2-phenyl-1-thioacetohydroximate	1487869	1433691	1426129	1273087	1302807	2009294	4375413	1	4350677	1222371	1	1209569	1	4754445	1	1285507	1215779	1279572	1127990	1201984	4626468	3470465	2977495	4419840	(149.02252, 58495.008)(151.0298, 158.52)(185.06801, 4232.9517)(188.0689, 1246.8401)(188.8194, 856.6887)(189.0724, 3573.16)(168.05202, 3475.8318)(169.0504, 1134.33)(173.00903, 727.9171)
VANILLATE	vanillate	5486903	4715404	5037145	1	2207035	5588203	4466936	3729241	4723801	3527551	3631126	2520280	2243321	3729669	3783379	6235154	6172576	6389771	4906048	4702595	4396336	1216094	2798217	1068888	(149.02254, 110520.4)(150.02582, 9068.019)(151.0292, 253.59)(185.0697, 381.85776)
CPD-1131	2-formylbenzoate	5430871	5620972	5030607	5433827	5190449	5430458	4459412	4213791	4367477	4036806	3577861	1633118	1976070	3551417	1639951	6028614	6520538	6406064	4249808	4322001	4242421	2840949	2782874	2904427	(149.02254, 115449.81)(150.0258, 9550.218)(151.0292, 254.62202)(136.024, 191.07)(152.05772, 529.1454)(155.00859, 3796.096)
CPD-10468	2-hydroxy-4-(methylsulfanyl)butanoate	4817779	1434742	237554	1	1	2136648	1301458	1054079	4067245	1033566	3541723	136280	1	160449	3601465	507929	498246	5728412	4079400	3985846	4052546	230845	286471	276087	(149.02257, 61153.574)(150.02588, 6693.9614)(151.03195, 163.8425)(153.03575, 6785.2573)(152.035, 1892.65)(137.0239, 6137.62)(168.77596, 14074.596)(169.65933, 8983.909)(171.06378, 1606.36)(150.25296, 4122.3657)(151.04901, 21081.91)(154.05194, 5727.8496)(175.01709, 39763.992)(176.0209, 3416.465)(156.62474, 21431.727)(158.00195, 52565.645)
HOMOGENTISATE	homogentisate	1	1	1	1	2207035	1	1	1	1	1	1	2520280	2243321	1	1	1	1	1	1	1	1	1216094	1	1068888	(149.02258, 82530.81)(150.02586, 6095.6646)
3-PHENYLPROPIONATE	3-phenylpropanoate	1161057	817983	10535839	1610959	1971929	1609549	830397	1140696	1073608	7390560	7569237	7649695	4449237	4335483	4317452	21757266	18458864	18403672	10282460	10275317	10444520	1600300	1664663	1703634	(149.05927, 24208.033)(150.05838, 3622.6975)(131.04881, 28601.94)(132.05196, 1247.598)(154.3957, 4390.746)(154.3302, 4051.5278)(153.0715, 600.0)(155.0845, 2603.55)(133.49686, 6313.094)(134.05934, 10443.947)(168.18344, 12663.7295)(169.7111, 10733.103)(172.0226, 11690.047)(172.1053, 6824.48)(150.08832, 108782.7)(151.08893, 15492.535)(173.55484, 1543.0195)(174.48274, 525.49286)(156.79797, 663.385)(1…
CPD-13662	(1R)-trans-chrysanthemate	1	1	1	1	1	1	1	1	1	1	1	1	1	1	1	1	1	1	1	1	1	836593	862741	538097	(149.09523, 11447.101)(150.0897, 1501.05)(170.11652, 3211.1467)(173.1306, 9038.99)(152.10674, 4616.56)(187.1413, 776.8)(192.10124, 15172.017)(195.11084, 7759.096)(174.42763, 2320.57)(177.1012, 8513.67)
COUMARALDEHYDE	4-coumaraldehyde	103354136	90151688	93276208	131731984	150631200	123343112	17266006	14626152	15968131	15506195	13439556	15911069	38423560	11816738	11831527	192222192	164667520	165471056	91794152	91782248	93548272	15217981	14175819	14971352	(149.68819, 18954.947)(151.22894, 12530.04)(151.06099, 7330.8403)(133.59727, 20560.29)(149.5605, 36349.887)(150.05637, 3178.0498)(132.70454, 31567.791)(133.72305, 1722.5272)(136.0612, 2760.7942)(166.08556, 2102027.8)(167.08821, 198804.62)(168.08951, 17820.273)(148.4834, 18662.47)(149.07289, 1941.0273)(174.35406, 2192.7249)(175.0551, 274.34)(155.03326, 349.53)
CPD0-1240	monofluoromethylornithine	425793	489045	392047	659824	857065	671742	495357	522828	486236	592921	528654	656178	674265	636152	449659	603613	636232	602641	611993	621149	709283	509418	400774	499165	(149.69705, 1785.274)(151.1063, 280.1)(151.11047, 3851.0251)(152.10631, 5749.3667)(184.2823, 17404.324)(184.1391, 1941.55)(165.12645, 14641.371)(166.12845, 1893.2042)(191.60194, 1735.5751)(173.09213, 1154.16)
CPD0-1614	2-methylaspartate	123607	1079281	97851	1424080	525834	621508	274229	210658	244124	124333	207940	157531	190763	187446	116329	1832616	338262	1449149	100754	1	320306	107983	98482	264970	(149.70143, 4188.4897)(150.0553, 3959.39)(131.0414, 2124.03)(150.0616, 13394.258)(149.5625, 5432.6304)(129.45334, 8783.142)(131.04541, 4412.994)(165.99773, 341140.44)(167.33835, 49801.684)(168.0899, 5249.025)(147.43593, 21517.986)(149.07594, 2025.5024)(173.04071, 241.715)(154.0352, 1990.98)
CPD-12328	3-phenylpropionaldoxime	1	655731	1519829	1853919	2036716	594979	1204575	1369685	1	862402	950399	1021028	1218712	1118058	1	2430263	1	2008713	637626	652149	635017	1824258	1834081	1997553	(149.9467, 2759.1829)(131.36078, 515.34717)(150.09036, 41457.332)(151.09244, 3722.5183)(133.19492, 11563.464)(133.081, 1668.8457)(167.11624, 7983.19)(168.12114, 371.43335)(151.86339, 549.8837)(174.48001, 1319.1445)(176.0871, 3514.285)(176.0855, 610.34)(156.93156, 3660.2927)(157.87738, 599.62195)
D-GLT	D-glutamate	123607	1	97851	1	1	1	274229	210658	244124	124333	207940	157531	190763	187446	116329	1	1	1	100754	1	1	107983	98482	264970	(149.98831, 4716.617)(150.0553, 3959.39)(151.39827, 14246.46)(148.0617, 513.71)(129.1138, 6406.484)(166.0855, 519684.06)(167.08765, 56772.81)(168.0899, 5249.025)(148.07417, 31297.707)(149.07594, 2025.5024)
GLT	L-glutamate	123607	1	97851	1	1	1	274229	210658	244124	124333	207940	157531	190763	187446	116329	1	1	1	100754	1	1	107983	98482	264970	(149.98831, 4716.617)(150.0553, 3959.39)(151.39827, 14246.46)(148.0617, 513.71)(129.1138, 6406.484)(166.0855, 519684.06)(167.08765, 56772.81)(168.0899, 5249.025)(148.07417, 31297.707)(149.07594, 2025.5024)
CPD-12389	1-(methylsulfanyl)-4-<i>aci</i>-nitrobutane	1	1	1	639467	1	1	1	1	1	1	1	1835254	1	1428928	1	1	1	1	1	1	1	1	3293516	2723969	(150.05496, 3754.4597)(153.04958, 745.94336)(154.0505, 4481.43)(131.0406, 56.71)(134.24886, 3105.578)(134.04504, 163.205)(135.0448, 65.83)(167.08644, 29438.693)(168.08986, 2234.2068)(169.0984, 288.97)(149.74413, 105555.19)(173.53825, 119.86)(155.03275, 2255.2651)
CPD-9300	<i>S</i>-ethyl-L-cysteine	1	1	1	639467	1	1	1	1	1	1	1	1835254	1	1428928	1	1	1	1	1	1	1	1	3293516	2723969	(150.05496, 3754.4597)(153.04958, 745.94336)(154.0505, 4481.43)(131.0406, 56.71)(134.24886, 3105.578)(134.04504, 163.205)(135.0448, 65.83)(167.08644, 29438.693)(168.08986, 2234.2068)(169.0984, 288.97)(149.74413, 105555.19)(173.53825, 119.86)(155.03275, 2255.2651)
DIHYDROCOUMARIN	3,4-dihydrocoumarin	1	1	1	1	1	1	17266006	14626152	15968131	15506195	13439556	15911069	1	11816738	11831527	1	1	1	1	1	1	15217981	14175819	14971352	(150.05515, 5204.4487)(152.0668, 16103.297)(135.05383, 1011.345)(152.0672, 17860.04)(134.05933, 23788.281)(135.18527, 2342.4111)(136.0612, 2760.7942)(166.08559, 479950.12)(167.08778, 49718.086)(168.08865, 2883.142)(148.07428, 29495.68)(149.07289, 1941.0273)(174.05457, 4126.3057)
CPD-9949	1-phenylpropane-1,2-dione	1	1	1	1	1	1	17266006	14626152	15968131	15506195	13439556	15911069	1	11816738	11831527	1	1	1	1	1	1	15217981	14175819	14971352	(150.05515, 5204.4487)(152.0668, 16103.297)(135.05383, 1011.345)(152.0672, 17860.04)(134.05933, 23788.281)(135.18527, 2342.4111)(136.0612, 2760.7942)(166.08559, 479950.12)(167.08778, 49718.086)(168.08865, 2883.142)(148.07428, 29495.68)(149.07289, 1941.0273)(174.05457, 4126.3057)
CPD-9950	cathinone	661805	673181	541527	978541	1366087	622899	890569	898802	823535	912333	825402	952935	1554819	1295080	753204	1916523	1755155	1920426	661814	686260	653326	2221060	2054738	1893259	(150.09035, 31817.107)(151.09232, 3330.651)(133.96089, 13495.077)(133.07959, 2778.785)(152.43791, 1927.04)(134.09557, 19008.557)(135.09622, 771.72205)(151.12009, 993.446)(175.58719, 3296.7883)(176.46193, 2826.0288)(156.07555, 2422.8499)(157.07545, 6789.0664)(158.07886, 694.716)
CPD-9930	<i>t</i>-anethole	2495749	2085524	2140544	1685004	1686113	1122887	1796411	558494	1756103	2058452	2032076	2025039	1067793	1026939	999732	1477963	943754	1392075	1769690	1738111	1629069	3233616	3643510	2546257	(150.09688, 8900.718)(153.1016, 1056.385)(130.65166, 4444.833)(132.08084, 1510.0901)(151.04935, 6545.82)(150.5993, 3510.7524)(133.1922, 29559.715)(134.49342, 3442.0027)(166.1211, 35410.945)(167.12193, 5986.1577)(148.11104, 34397.957)(149.11299, 7458.0684)(174.12889, 7404.474)(175.08624, 3194.8677)(175.5909, 2052.305)(153.67834, 2484.8884)(157.07785, 825.2)
CPD-6484	methylchavicol	1	1	1	1	1	1122887	1	1	1	1	1	1	1067793	1026939	1	1	1	1	1	1	1	3233616	3643510	2546257	(150.09688, 8900.718)(153.1016, 1056.385)(131.08383, 2845.0732)(132.08084, 1510.0901)(150.43246, 8962.331)(151.09985, 6138.605)(133.09175, 7108.1763)(166.12146, 41278.066)(167.12193, 5986.1577)(148.1109, 425.53)(173.48418, 2939.0042)(175.085, 10973.68)(155.87619, 2111.262)(157.07785, 825.2)
BETA-D-XYLOSE	&beta;-D-xylopyranose	1386354	1190070	1112891	1993481	2004359	1212001	2192657	4024498	1159440	4283904	1	2036244	7136520	6901061	6918507	2394875	981409	1919654	1066898	1081640	1847010	14603609	14318069	14688931	(150.5346, 136913.36)(153.05656, 63941.066)(154.0576, 9031.43)(134.04549, 2293.147)(135.05057, 228.85999)(152.29608, 4066.99)(156.06908, 4034.0498)(134.55682, 447098.72)(136.31152, 1611005.8)(137.0575, 472.27)(170.89442, 1150.6581)(172.59607, 910.25)(150.25082, 98822.61)(151.08092, 8323.953)(152.0677, 4692.4)(155.93442, 1107.681)(156.0345, 141.03)
CPD-15377	<i>aldehydo</i>-D-xylose	1386354	1190070	1112891	1993481	2004359	1212001	2192657	4024498	1159440	4283904	1	2036244	7136520	6901061	6918507	2394875	981409	1919654	1066898	1081640	1847010	14603609	14318069	14688931	(150.5346, 136913.36)(153.05656, 63941.066)(154.0576, 9031.43)(134.04549, 2293.147)(135.05057, 228.85999)(152.29608, 4066.99)(156.06908, 4034.0498)(134.55682, 447098.72)(136.31152, 1611005.8)(137.0575, 472.27)(170.89442, 1150.6581)(172.59607, 910.25)(150.25082, 98822.61)(151.08092, 8323.953)(152.0677, 4692.4)(155.93442, 1107.681)(156.0345, 141.03)
PENTOSE-RING	pentose-ring	1386354	1190070	1112891	1993481	2004359	1212001	2192657	4024498	1159440	4283904	1	2036244	7136520	6901061	6918507	2394875	981409	1919654	1066898	1081640	1847010	14603609	14318069	14688931	(150.5346, 136913.36)(153.05656, 63941.066)(154.0576, 9031.43)(134.04549, 2293.147)(135.05057, 228.85999)(152.29608, 4066.99)(156.06908, 4034.0498)(134.55682, 447098.72)(136.31152, 1611005.8)(137.0575, 472.27)(170.89442, 1150.6581)(172.59607, 910.25)(150.25082, 98822.61)(151.08092, 8323.953)(152.0677, 4692.4)(155.93442, 1107.681)(156.0345, 141.03)
CPD-6001	L-ribose	1386354	1190070	1112891	1993481	2004359	1212001	2192657	4024498	1159440	4283904	1	2036244	7136520	6901061	6918507	2394875	981409	1919654	1066898	1081640	1847010	14603609	14318069	14688931	(150.5346, 136913.36)(153.05656, 63941.066)(154.0576, 9031.43)(134.04549, 2293.147)(135.05057, 228.85999)(152.29608, 4066.99)(156.06908, 4034.0498)(134.55682, 447098.72)(136.31152, 1611005.8)(137.0575, 472.27)(170.89442, 1150.6581)(172.59607, 910.25)(150.25082, 98822.61)(151.08092, 8323.953)(152.0677, 4692.4)(155.93442, 1107.681)(156.0345, 141.03)
CPD-10330	&alpha;-D-ribofuranose	1386354	1190070	1112891	1993481	2004359	1212001	2192657	4024498	1159440	4283904	1	2036244	7136520	6901061	6918507	2394875	981409	1919654	1066898	1081640	1847010	14603609	14318069	14688931	(150.5346, 136913.36)(153.05656, 63941.066)(154.0576, 9031.43)(134.04549, 2293.147)(135.05057, 228.85999)(152.29608, 4066.99)(156.06908, 4034.0498)(134.55682, 447098.72)(136.31152, 1611005.8)(137.0575, 472.27)(170.89442, 1150.6581)(172.59607, 910.25)(150.25082, 98822.61)(151.08092, 8323.953)(152.0677, 4692.4)(155.93442, 1107.681)(156.0345, 141.03)
CPD-15700	<i>aldehydo</i>-D-arabinose	1386354	1190070	1112891	1993481	2004359	1212001	2192657	4024498	1159440	4283904	1	2036244	7136520	6901061	6918507	2394875	981409	1919654	1066898	1081640	1847010	14603609	14318069	14688931	(150.5346, 136913.36)(153.05656, 63941.066)(154.0576, 9031.43)(134.04549, 2293.147)(135.05057, 228.85999)(152.29608, 4066.99)(156.06908, 4034.0498)(134.55682, 447098.72)(136.31152, 1611005.8)(137.0575, 472.27)(170.89442, 1150.6581)(172.59607, 910.25)(150.25082, 98822.61)(151.08092, 8323.953)(152.0677, 4692.4)(155.93442, 1107.681)(156.0345, 141.03)
CPD-15699	<i>aldehydo</i>-L-arabinose	1386354	1190070	1112891	1993481	2004359	1212001	2192657	4024498	1159440	4283904	1	2036244	7136520	6901061	6918507	2394875	981409	1919654	1066898	1081640	1847010	14603609	14318069	14688931	(150.5346, 136913.36)(153.05656, 63941.066)(154.0576, 9031.43)(134.04549, 2293.147)(135.05057, 228.85999)(152.29608, 4066.99)(156.06908, 4034.0498)(134.55682, 447098.72)(136.31152, 1611005.8)(137.0575, 472.27)(170.89442, 1150.6581)(172.59607, 910.25)(150.25082, 98822.61)(151.08092, 8323.953)(152.0677, 4692.4)(155.93442, 1107.681)(156.0345, 141.03)
CPD0-1108	&beta;-D-ribofuranose	1386354	1190070	1112891	1993481	2004359	1212001	2192657	4024498	1159440	4283904	1	2036244	7136520	6901061	6918507	2394875	981409	1919654	1066898	1081640	1847010	14603609	14318069	14688931	(150.5346, 136913.36)(153.05656, 63941.066)(154.0576, 9031.43)(134.04549, 2293.147)(135.05057, 228.85999)(152.29608, 4066.99)(156.06908, 4034.0498)(134.55682, 447098.72)(136.31152, 1611005.8)(137.0575, 472.27)(170.89442, 1150.6581)(172.59607, 910.25)(150.25082, 98822.61)(151.08092, 8323.953)(152.0677, 4692.4)(155.93442, 1107.681)(156.0345, 141.03)
CPD-15818	<i>aldehydo</i>-D-ribose	1386354	1190070	1112891	1993481	2004359	1212001	2192657	4024498	1159440	4283904	1	2036244	7136520	6901061	6918507	2394875	981409	1919654	1066898	1081640	1847010	14603609	14318069	14688931	(150.5346, 136913.36)(153.05656, 63941.066)(154.0576, 9031.43)(134.04549, 2293.147)(135.05057, 228.85999)(152.29608, 4066.99)(156.06908, 4034.0498)(134.55682, 447098.72)(136.31152, 1611005.8)(137.0575, 472.27)(170.89442, 1150.6581)(172.59607, 910.25)(150.25082, 98822.61)(151.08092, 8323.953)(152.0677, 4692.4)(155.93442, 1107.681)(156.0345, 141.03)
BETA-L-ARABINOSE	&beta;-L-arabinopyranose	1386354	1190070	1112891	1993481	2004359	1212001	2192657	4024498	1159440	4283904	1	2036244	7136520	6901061	6918507	2394875	981409	1919654	1066898	1081640	1847010	14603609	14318069	14688931	(150.5346, 136913.36)(153.05656, 63941.066)(154.0576, 9031.43)(134.04549, 2293.147)(135.05057, 228.85999)(152.29608, 4066.99)(156.06908, 4034.0498)(134.55682, 447098.72)(136.31152, 1611005.8)(137.0575, 472.27)(170.89442, 1150.6581)(172.59607, 910.25)(150.25082, 98822.61)(151.08092, 8323.953)(152.0677, 4692.4)(155.93442, 1107.681)(156.0345, 141.03)
CPD-227	&alpha;-D-lyxopyranose	1386354	1190070	1112891	1993481	2004359	1212001	2192657	4024498	1159440	4283904	1	2036244	7136520	6901061	6918507	2394875	981409	1919654	1066898	1081640	1847010	14603609	14318069	14688931	(150.5346, 136913.36)(153.05656, 63941.066)(154.0576, 9031.43)(134.04549, 2293.147)(135.05057, 228.85999)(152.29608, 4066.99)(156.06908, 4034.0498)(134.55682, 447098.72)(136.31152, 1611005.8)(137.0575, 472.27)(170.89442, 1150.6581)(172.59607, 910.25)(150.25082, 98822.61)(151.08092, 8323.953)(152.0677, 4692.4)(155.93442, 1107.681)(156.0345, 141.03)
XYLOSE	&alpha;-D-xylopyranose	1386354	1190070	1112891	1993481	2004359	1212001	2192657	4024498	1159440	4283904	1	2036244	7136520	6901061	6918507	2394875	981409	1919654	1066898	1081640	1847010	14603609	14318069	14688931	(150.5346, 136913.36)(153.05656, 63941.066)(154.0576, 9031.43)(134.04549, 2293.147)(135.05057, 228.85999)(152.29608, 4066.99)(156.06908, 4034.0498)(134.55682, 447098.72)(136.31152, 1611005.8)(137.0575, 472.27)(170.89442, 1150.6581)(172.59607, 910.25)(150.25082, 98822.61)(151.08092, 8323.953)(152.0677, 4692.4)(155.93442, 1107.681)(156.0345, 141.03)
CPD-12045	&alpha;-L-arabinofuranose	1386354	1190070	1112891	1993481	2004359	1212001	2192657	4024498	1159440	4283904	1	2036244	7136520	6901061	6918507	2394875	981409	1919654	1066898	1081640	1847010	14603609	14318069	14688931	(150.5346, 136913.36)(153.05656, 63941.066)(154.0576, 9031.43)(134.04549, 2293.147)(135.05057, 228.85999)(152.29608, 4066.99)(156.06908, 4034.0498)(134.55682, 447098.72)(136.31152, 1611005.8)(137.0575, 472.27)(170.89442, 1150.6581)(172.59607, 910.25)(150.25082, 98822.61)(151.08092, 8323.953)(152.0677, 4692.4)(155.93442, 1107.681)(156.0345, 141.03)
MET	L-methionine	300928	343267	272023	639467	176577	332654	234335	7648786	242484	147590	170335	1835254	1435019	1428928	2024093	422699	392634	380661	250442	231755	273468	1472933	3293516	2723969	(150.59999, 4399.1353)(152.04875, 837.7334)(154.04999, 10392.037)(131.0424, 14453.547)(132.04315, 2430.72)(134.13933, 4207.5664)(134.04504, 163.205)(135.0448, 65.83)(167.41847, 23328.4)(168.29912, 1090.1321)(169.0984, 288.97)(151.62712, 21196.84)(153.0705, 260.59998)(173.53825, 119.86)(156.03122, 1197.7324)
CPD-8913	3-(aminomethyl)indole	446841	428436	392047	661698	841128	670573	424386	401604	387794	571190	547376	592279	7182006	399679	432082	603613	656012	602641	644557	636246	709283	447665	974381	7212670	(150.60083, 6689.2515)(150.8599, 5089.4634)(152.1066, 14790.71)(165.58566, 18371.793)(166.12814, 1703.6207)(171.80128, 12713.297)(171.08617, 2630.1233)(172.0854, 120.340004)
CPD-402	<i>N</i>-methylanthranilate	87558	1	252025	768051	2064685	1606446	2332697	83385	1	95287	3741681	80391	7398437	8718248	444783	208719	96018	1713237	3381480	83327	122735	17258700	16443629	1	(150.65727, 5872.0625)(152.0568, 246086.45)(132.96869, 2219.7053)(151.8847, 2419.85)(154.07135, 1104.5413)(156.07463, 4084.589)(134.82072, 30028.953)(136.53522, 837304.0)(136.95204, 198503.64)(137.0626, 53615.2)(169.59499, 4846.984)(171.34528, 658.51)(172.0968, 1858.67)(150.36308, 92780.36)(151.0813, 3302.19)(175.55124, 294.91)(156.53723, 1035.5908)(156.0336, 264.41)
CPD-11495	(2-hydroxyphenyl)acetate	364942	303629	1807956	2074490	1	531335	156663	192842	188010	148123	2164778	1	5973067	5566332	5534802	641627	2344229	2472271	278066	282523	1	5043161	5226024	4909798	(151.0395, 414.60858)(152.0365, 62.87)(137.0383, 279.13858)(153.30472, 4790.9023)(139.04785, 709.0029)(169.07495, 29275.47)(170.078, 5012.6426)(171.08234, 459.56403)(152.06757, 29829.7)(154.2832, 2702.714)(155.5198, 1098.5967)(156.07916, 643.0467)(176.03763, 253.24202)
CPD-8815	4-methylsalicylate	364942	303629	1807956	2074490	1	531335	156663	192842	188010	148123	2164778	1	5973067	5566332	5534802	641627	2344229	2472271	278066	282523	1	5043161	5226024	4909798	(151.0395, 414.60858)(152.0365, 62.87)(137.0383, 279.13858)(153.30472, 4790.9023)(139.04785, 709.0029)(169.07495, 29275.47)(170.078, 5012.6426)(171.08234, 459.56403)(152.06757, 29829.7)(154.2832, 2702.714)(155.5198, 1098.5967)(156.07916, 643.0467)(176.03763, 253.24202)
CPD0-2461	isoguanine	75734272	71745456	65288272	83360944	99397888	90629064	80138120	70740008	64025128	9487846	62050356	9726614	46744176	45218060	44643504	95103032	73126592	71858928	71628568	76097352	73159288	35425864	34352808	34438140	(151.04745, 443.31)(137.0411, 122.81)(152.05621, 1750227.4)(153.056, 116287.82)(154.05339, 6974.1514)(134.37952, 5275.948)(139.0531, 2169.4302)(169.99814, 19253.709)(172.15118, 953.93005)(173.59222, 470.30997)(174.0928, 615.855)(154.90811, 11890.37)(178.0478, 347.68)(160.0373, 102.94)
GUANINE	guanine	75734272	71745456	65288272	83360944	99397888	90629064	80138120	70740008	64025128	9487846	62050356	9726614	46744176	45218060	44643504	95103032	73126592	71858928	71628568	76097352	73159288	35425864	34352808	34438140	(151.04745, 443.31)(137.0411, 122.81)(152.05621, 1750227.4)(153.056, 116287.82)(154.05339, 6974.1514)(134.37952, 5275.948)(139.0531, 2169.4302)(169.99814, 19253.709)(172.15118, 953.93005)(173.59222, 470.30997)(174.0928, 615.855)(154.90811, 11890.37)(178.0478, 347.68)(160.0373, 102.94)
CPD-13370	(2E,4E,6E)-4-methylocta-2,4,6-trienedial	985918	1107435	911343	892158	855395	1010739	1388104	1444162	1250653	1430058	1390764	1577555	1	2119712	2292813	1	747433	712157	987594	1044903	1072526	3411557	3381853	3480454	(151.07495, 2382.4326)(134.06493, 2123.1086)(135.51239, 11899.802)(137.07336, 1480.6201)(152.00142, 890.1077)(135.07014, 22086.445)(137.07533, 1233.2733)(168.10085, 25984.56)(169.10309, 1943.7861)(150.09033, 37406.484)(151.09193, 1873.9677)(176.47768, 11862.32)(177.06902, 14228.475)
CPD-6501	benzyl acetate	985918	1107435	911343	892158	855395	1010739	1388104	1444162	1250653	1430058	1390764	1577555	1	2119712	2292813	1	747433	712157	987594	1044903	1072526	3411557	3381853	3480454	(151.07495, 2382.4326)(134.06493, 2123.1086)(135.51239, 11899.802)(137.07336, 1480.6201)(152.00142, 890.1077)(135.07014, 22086.445)(137.07533, 1233.2733)(168.10085, 25984.56)(169.10309, 1943.7861)(150.09033, 37406.484)(151.09193, 1873.9677)(176.47768, 11862.32)(177.06902, 14228.475)
COUMARYL-ALCOHOL	4-coumaryl alcohol	985918	1107435	911343	892158	855395	1010739	1388104	1444162	1250653	1430058	1390764	1577555	1	2119712	2292813	1	747433	712157	987594	1044903	1072526	3411557	3381853	3480454	(151.07495, 2382.4326)(134.06493, 2123.1086)(135.51239, 11899.802)(137.07336, 1480.6201)(152.00142, 890.1077)(135.07014, 22086.445)(137.07533, 1233.2733)(168.10085, 25984.56)(169.10309, 1943.7861)(150.09033, 37406.484)(151.09193, 1873.9677)(176.47768, 11862.32)(177.06902, 14228.475)
CPD-10037	(+)-carvone	2649740	2467729	2130332	2710246	3189629	2693176	1	1	1	1	1	1	1750697	1632227	1684352	3921040	3867173	3129457	2637132	2509450	2484318	1965217	2148925	2045967	(151.11075, 9839.541)(133.10048, 81705.78)(134.10323, 9067.771)(171.14745, 850.76904)(173.09438, 2377.705)(155.58482, 362.2675)
CPD-1089	(-)-carvone	2649740	2467729	2130332	2710246	3189629	2693176	1	1	1	1	1	1	1750697	1632227	1684352	3921040	3867173	3129457	2637132	2509450	2484318	1965217	2148925	2045967	(151.11075, 9839.541)(133.10048, 81705.78)(134.10323, 9067.771)(171.14745, 850.76904)(173.09438, 2377.705)(155.58482, 362.2675)
CPD-1002	4-isopropylbenzyl alcohol	2649740	2467729	2130332	2710246	3189629	2693176	1	1	1	1	1	1	1750697	1632227	1684352	3921040	3867173	3129457	2637132	2509450	2484318	1965217	2148925	2045967	(151.11075, 9839.541)(133.10048, 81705.78)(134.10323, 9067.771)(171.14745, 850.76904)(173.09438, 2377.705)(155.58482, 362.2675)
CPD-20030	(4<i>S</i>)-perillyl aldehyde	2649740	2467729	2130332	2710246	3189629	2693176	1	1	1	1	1	1	1750697	1632227	1684352	3921040	3867173	3129457	2637132	2509450	2484318	1965217	2148925	2045967	(151.11075, 9839.541)(133.10048, 81705.78)(134.10323, 9067.771)(171.14745, 850.76904)(173.09438, 2377.705)(155.58482, 362.2675)
CPD-4981	(+)-menthofuran	2649740	2467729	2130332	2710246	3189629	2693176	1	1	1	1	1	1	1750697	1632227	1684352	3921040	3867173	3129457	2637132	2509450	2484318	1965217	2148925	2045967	(151.11075, 9839.541)(133.10048, 81705.78)(134.10323, 9067.771)(171.14745, 850.76904)(173.09438, 2377.705)(155.58482, 362.2675)
CPD-8669	safranal	2649740	2467729	2130332	2710246	3189629	2693176	1	1	1	1	1	1	1750697	1632227	1684352	3921040	3867173	3129457	2637132	2509450	2484318	1965217	2148925	2045967	(151.11075, 9839.541)(133.10048, 81705.78)(134.10323, 9067.771)(171.14745, 850.76904)(173.09438, 2377.705)(155.58482, 362.2675)
CPD-2748	nornicotine	1212196	765824	1167818	1469192	1371960	1661356	1364695	1283896	1306061	1299139	1245695	1367542	625801	609548	604142	1315863	1342452	948728	886237	1282615	909084	321311	321647	308786	(151.11076, 30831.021)(152.11366, 3260.1902)(167.14195, 41254.984)(168.14519, 3912.1719)(175.44104, 2964.8289)(176.60945, 615.235)
CPD-9277	methiin	242006	598844	569876	746666	1393147	837413	1040655	677900	555853	600286	262231	642659	158365	664559	183680	277558	236368	165252	135140	131007	136429	235000	253850	347170	(151.91527, 14015.646)(152.0349, 6180.28)(135.01237, 1604.98)(153.91107, 3525.1865)(156.0416, 1146.65)(135.44376, 12583.43)(138.02756, 3179.026)(139.0319, 3585.2173)(169.78596, 16319.561)(172.06314, 7714.389)(173.1749, 8390.978)(173.73207, 5834.2363)(174.06525, 2690.815)(152.2775, 435267.8)(153.85172, 13401.924)(154.0564, 9164.93)(174.97404, 118435.15)(176.10405, 12578.41)(156.59224, 11003.257)(1…
CPD-2205	(E)-(4-hydroxyphenyl)acetaldehyde oxime	2068135	1774584	1822986	1454895	1364361	1548986	3754029	4329164	4314805	839192	1172107	1594663	1567764	967446	6906348	1345278	672720	719624	1606310	2196950	1563972	578572	2606777	595007	(151.99316, 23019.844)(153.62344, 3458.4268)(156.0777, 3302.237)(134.72583, 195126.23)(136.24864, 214344.8)(136.68681, 38273.957)(137.06264, 4223.1934)(153.33887, 55248.188)(153.5172, 8428.993)(154.0752, 218.115)(134.0595, 21684.72)(135.06195, 2014.7279)(170.38503, 3268.5854)(153.96013, 16351.127)(155.09485, 8305.53)(174.20827, 4501.284)(175.05396, 221.22)(159.4867, 4480.2607)(160.4734, 7820.906)…
CPD-15332	9H-purine-2,6,8-triol	5688924	4605801	4198378	5613688	1	6243016	7398942	4887598	5015575	5658602	4764113	5106573	4784353	5314593	4947157	5532851	4818654	4168417	5411774	5869968	5784387	4207509	4493658	4769474	(152.01685, 596.52)(154.03564, 3575.4668)(186.0665, 134112.34)(168.04976, 255504.83)(169.05106, 51797.598)(191.01628, 2680.7173)(192.01677, 480.88916)
URATE	urate	5688924	4605801	4198378	5613688	1	6243016	7398942	4887598	5015575	5658602	4764113	5106573	4784353	5314593	4947157	5532851	4818654	4168417	5411774	5869968	5784387	4207509	4493658	4769474	(152.01685, 596.52)(154.03564, 3575.4668)(186.0665, 134112.34)(168.04976, 255504.83)(169.05106, 51797.598)(191.01628, 2680.7173)(192.01677, 480.88916)
CPD-12383	1-<i>aci</i>-nitro-2-phenylethane	1	1	1	1454895	1	1548986	3754029	4329164	4314805	839192	1172107	1594663	1	1	6906348	1	672720	719624	1	2196950	1563972	578572	1	595007	(152.0646, 13439.685)(154.06982, 1525.2859)(156.0793, 4858.14)(134.8377, 17726.773)(136.31033, 10707.95)(136.56091, 13917.928)(137.0628, 4050.185)(152.7376, 68650.15)(153.07162, 8390.56)(154.0752, 218.115)(134.05934, 25693.893)(135.06195, 2014.7279)(170.76678, 1999.5275)(154.76102, 686.55835)(174.16571, 5724.027)(159.58458, 5164.6885)(160.4734, 7820.906)(161.05981, 3970.8767)
CPD0-1408	5-deoxypyridoxal	1	1	1	1454895	1	1548986	3754029	4329164	4314805	839192	1172107	1594663	1	1	6906348	1	672720	719624	1	2196950	1563972	578572	1	595007	(152.0646, 13439.685)(154.06982, 1525.2859)(156.0793, 4858.14)(134.8377, 17726.773)(136.31033, 10707.95)(136.56091, 13917.928)(137.0628, 4050.185)(152.7376, 68650.15)(153.07162, 8390.56)(154.0752, 218.115)(134.05934, 25693.893)(135.06195, 2014.7279)(170.76678, 1999.5275)(154.76102, 686.55835)(174.16571, 5724.027)(159.58458, 5164.6885)(160.4734, 7820.906)(161.05981, 3970.8767)
CPD-1041	(<i>Z</i>)-[(4-hydroxyphenyl)acetaldehyde oxime]	1	1	1	1454895	1	1548986	3754029	4329164	4314805	839192	1172107	1594663	1	1	6906348	1	672720	719624	1	2196950	1563972	578572	1	595007	(152.0646, 13439.685)(154.06982, 1525.2859)(156.0793, 4858.14)(134.8377, 17726.773)(136.31033, 10707.95)(136.56091, 13917.928)(137.0628, 4050.185)(152.7376, 68650.15)(153.07162, 8390.56)(154.0752, 218.115)(134.05934, 25693.893)(135.06195, 2014.7279)(170.76678, 1999.5275)(154.76102, 686.55835)(174.16571, 5724.027)(159.58458, 5164.6885)(160.4734, 7820.906)(161.05981, 3970.8767)
CPD-10523	<i>cis</i>-indole-2,3-dihydrodiol	1	1	1	1454895	1	1548986	3754029	4329164	4314805	839192	1172107	1594663	1	1	6906348	1	672720	719624	1	2196950	1563972	578572	1	595007	(152.0646, 13439.685)(154.06982, 1525.2859)(156.0793, 4858.14)(134.8377, 17726.773)(136.31033, 10707.95)(136.56091, 13917.928)(137.0628, 4050.185)(152.7376, 68650.15)(153.07162, 8390.56)(154.0752, 218.115)(134.05934, 25693.893)(135.06195, 2014.7279)(170.76678, 1999.5275)(154.76102, 686.55835)(174.16571, 5724.027)(159.58458, 5164.6885)(160.4734, 7820.906)(161.05981, 3970.8767)
RIBITOL	ribitol	188126	1	1	1	1	1	1	443742	274093	408264	306788	442814	1	1	1	1	1	1	1	1	1	1	1	2388800	(152.06725, 27162.938)(153.0672, 5041.26)(134.05948, 3325.7214)(158.08984, 11839.44)(173.82622, 8951.581)(174.97427, 50748.715)(175.1175, 61554.58)(154.38176, 52824.562)(155.09766, 3722.4036)(156.10164, 4756.5034)(179.73332, 15045.118)(180.0659, 16356.85)(157.0478, 311.55)
XYLITOL	xylitol	188126	1	1	1	1	1	1	443742	274093	408264	306788	442814	1	1	1	1	1	1	1	1	1	1	1	2388800	(152.06725, 27162.938)(153.0672, 5041.26)(134.05948, 3325.7214)(158.08984, 11839.44)(173.82622, 8951.581)(174.97427, 50748.715)(175.1175, 61554.58)(154.38176, 52824.562)(155.09766, 3722.4036)(156.10164, 4756.5034)(179.73332, 15045.118)(180.0659, 16356.85)(157.0478, 311.55)
CPD-355	D-arabinitol	188126	263695	1	160408	1	211489	1	443742	274093	408264	306788	442814	1	1	2134658	740127	775234	632202	1	268962	279850	6389210	1	2388800	(152.06769, 29142.838)(153.06815, 1637.175)(154.0791, 157.3)(134.64844, 10291.648)(136.39522, 1917.9535)(156.21095, 7898.6157)(155.0803, 2959.7334)(156.0806, 6052.98)(137.27249, 19958.04)(138.07346, 2495.8699)(172.75775, 6108.7827)(174.78093, 24654.07)(175.11789, 33013.8)(154.93016, 31530.205)(155.09766, 3722.4036)(156.10164, 4756.5034)(179.81708, 11144.808)(180.0677, 6396.856)(159.23343, 7669.65…
CPD-8851	dopamine quinone	5445905	4893348	5581692	1107175	1373488	2889352	2055283	2225507	2219523	748294	911840	1632742	8590230	7923756	7013891	1071676	1148302	431516	2156822	1433812	1397190	960235	6253451	5733366	(152.06816, 89472.266)(153.06802, 7870.607)(134.05925, 22047.82)(135.05972, 2047.6746)(154.96062, 6459.761)(155.98653, 2865.8098)(157.76057, 2116.905)(158.0946, 2636.12)(136.07143, 76935.18)(137.0736, 6257.33)(172.15242, 3486.7937)(174.66855, 41448.113)(174.8692, 5162.5674)(155.10037, 833.5356)(176.94232, 14606.958)(178.57019, 5245.808)(180.0681, 11266.385)(159.9296, 7587.892)(161.06064, 7385.260…
CPD-9953	(+)-norpseudoephedrine	2308805	1753145	1809462	757933	786605	1655202	2027184	2061150	1974407	2690994	2559113	505723	806388	847741	876658	591857	1053900	982965	1380834	1183202	1228318	1668472	469899	339435	(152.10579, 3443.2092)(153.10117, 776.18256)(134.09563, 24342.389)(135.09525, 2525.8147)(136.10931, 199.74666)(155.1162, 3788.19)(136.25276, 456.01572)(137.1065, 10092.875)(174.14742, 8897.511)(175.15015, 1229.7966)(153.13696, 3699.858)(176.92711, 7057.0654)(177.60303, 14736.808)(178.60489, 3512.41)(158.21558, 9089.93)(160.09471, 1609.2905)(161.0991, 3829.285)
CPD-9951	(-)-norephedrine	1	1	1	1	1	1	1	1	1	1	1	505723	1	1	1	1	1	1	1	1	1	1	469899	339435	(152.1062, 3348.5967)(153.10045, 546.465)(134.0962, 8429.862)(135.09494, 664.525)(136.11066, 641.245)(176.6024, 2149.065)(177.0998, 3272.26)(179.107, 139.76)(159.0889, 3043.8665)(160.09492, 460.68335)
DIHYDROXYINDOLE	5,6-dihydroxyindole	11019804	9768104	10100328	13075813	196565	11728877	9211206	1	7674384	7639894	1591380	7830483	1325060	4983567	2162425	18705496	15711733	15653738	9574345	9266269	9678391	1624967	2141120	1858456	(152.15573, 365160.56)(152.99597, 67093.55)(153.981, 9390.187)(134.54503, 4317.5728)(150.05583, 7891.1064)(151.05261, 658.8221)(135.51715, 1553.5363)(137.05994, 7490.4937)(169.25237, 1949.9794)(171.4689, 325.2)(150.75967, 8461.231)(155.76567, 531.50867)
XANTHINE	xanthine	76497760	72324984	65717820	83936016	71711200	70738136	81511368	63929548	64174852	10059221	71779312	10057664	48180456	39138872	42457816	82054056	73644616	72839840	82071224	77141328	74720192	25798092	27375844	28024854	(152.46364, 818.3486)(156.04651, 361.27002)(135.02942, 62520.473)(173.79115, 2975.0964)(174.07796, 2403.0334)(152.05618, 1866517.9)(153.30519, 99841.1)(154.05379, 8588.834)(175.21823, 14870.514)(176.42566, 1854.3861)(157.00905, 5535.2607)
BENZYL-ISOTHIOCYANATE	benzylisothiocyanate	1	1	1	368447	259875	370580	1	176044	1	1	1	212300	217661	1	194539	1	1	1	289188	1	1	383458	366568	398669	(152.53741, 4569.2676)(152.0347, 1003.49)(168.46288, 5609.787)(169.89308, 19735.027)(171.06427, 3028.4202)(175.01727, 52364.08)(176.02138, 1757.79)
TARTRATE	L-tartrate	2116044	1564303	1521311	1480893	1	1351188	1	1359374	1426053	1475755	1366598	1470840	1405614	1440884	1377519	2072048	1553674	1447801	1430663	1479405	1496165	1404955	1356508	1339098	(153.00922, 520.4463)(151.9572, 179.28647)(152.0147, 259.3)(131.3651, 143.99818)(166.0338, 655.8076)(167.0272, 184.72)(148.02496, 15570.527)(170.99197, 1101.1517)(154.9884, 12007.38)
MESO-TARTRATE	<i>meso</i>-tartrate	2116044	1564303	1521311	1480893	1	1351188	1	1359374	1426053	1475755	1366598	1470840	1405614	1440884	1377519	2072048	1553674	1447801	1430663	1479405	1496165	1404955	1356508	1339098	(153.00922, 520.4463)(151.9572, 179.28647)(152.0147, 259.3)(131.3651, 143.99818)(166.0338, 655.8076)(167.0272, 184.72)(148.02496, 15570.527)(170.99197, 1101.1517)(154.9884, 12007.38)
D-TARTRATE	D-tartrate	2116044	1564303	1521311	1480893	1	1351188	1	1359374	1426053	1475755	1366598	1470840	1405614	1440884	1377519	2072048	1553674	1447801	1430663	1479405	1496165	1404955	1356508	1339098	(153.00922, 520.4463)(151.9572, 179.28647)(152.0147, 259.3)(131.3651, 143.99818)(166.0338, 655.8076)(167.0272, 184.72)(148.02496, 15570.527)(170.99197, 1101.1517)(154.9884, 12007.38)
CPD-703	4-nitrobenzaldehyde	508995	248311	273290	244703	195300	280333	176162	477183	522809	430435	261269	425905	1	555634	92890	145694	158772	135696	209212	434391	300675	133660	1	172742	(153.03487, 4892.455)(154.11339, 1942.8086)(155.04016, 1571.64)(135.0695, 882.081)(136.21468, 1198.5134)(138.02756, 1643.0574)(152.03497, 4566.3853)(138.85576, 1474.94)(139.0332, 1280.09)(170.06207, 13142.934)(171.29898, 752.6359)(173.0699, 4761.908)(153.05362, 491.081)(175.01753, 402437.03)(176.02034, 24676.693)(177.2495, 5667.531)(156.00838, 3389.1821)
3-NITROBENZALDEHYDE	3-nitrobenzaldehyde	508995	248311	273290	244703	195300	280333	176162	477183	522809	430435	261269	425905	1	555634	92890	145694	158772	135696	209212	434391	300675	133660	1	172742	(153.03487, 4892.455)(154.11339, 1942.8086)(155.04016, 1571.64)(135.0695, 882.081)(136.21468, 1198.5134)(138.02756, 1643.0574)(152.03497, 4566.3853)(138.85576, 1474.94)(139.0332, 1280.09)(170.06207, 13142.934)(171.29898, 752.6359)(173.0699, 4761.908)(153.05362, 491.081)(175.01753, 402437.03)(176.02034, 24676.693)(177.2495, 5667.531)(156.00838, 3389.1821)
CPD-9059	2-nitrobenzaldehyde	508995	248311	273290	244703	195300	280333	176162	477183	522809	430435	261269	425905	1	555634	92890	145694	158772	135696	209212	434391	300675	133660	1	172742	(153.03487, 4892.455)(154.11339, 1942.8086)(155.04016, 1571.64)(135.0695, 882.081)(136.21468, 1198.5134)(138.02756, 1643.0574)(152.03497, 4566.3853)(138.85576, 1474.94)(139.0332, 1280.09)(170.06207, 13142.934)(171.29898, 752.6359)(173.0699, 4761.908)(153.05362, 491.081)(175.01753, 402437.03)(176.02034, 24676.693)(177.2495, 5667.531)(156.00838, 3389.1821)
23-dihydrodipicolinate	L-2,3-dihydrodipicolinate	2971710	2320081	1978153	2794606	4326375	1	1	2891160	2325653	2773384	2353767	2382408	2198807	2281485	2584982	2843383	233500	255422	2679493	2614402	1	2683912	2675591	2864589	(153.03491, 8872.753)(154.03606, 3280.5957)(155.04027, 4587.777)(170.04825, 42541.55)(152.03497, 7930.394)(187.2599, 81015.234)(188.27748, 15157.201)(189.07, 662.5)(170.06207, 24789.416)(171.06236, 1637.3262)(173.06517, 13649.02)(194.0323, 435.84)(175.01749, 212313.19)(176.02052, 14000.408)(177.59848, 5074.77)
DELTA1-PIPERIDEINE-2-6-DICARBOXYLATE	(<i>S</i>)-2,3,4,5-tetrahydrodipicolinate	2971710	2320081	1978153	2794606	4326375	1	1	2891160	2325653	2773384	2353767	2382408	2198807	2281485	2584982	2843383	1	1	2679493	2614402	1	2683912	2675591	2864589	(153.03491, 8872.753)(154.03606, 3280.5957)(155.04027, 4587.777)(170.04825, 42541.55)(152.03497, 7930.394)(187.2796, 88699.94)(188.2996, 16787.965)(170.06207, 24789.416)(171.06236, 1637.3262)(173.06517, 13649.02)(194.0323, 435.84)(175.01755, 232240.23)(176.02052, 14000.408)(177.59848, 5074.77)
CPD-14590	(R)-4-hydroxymandelonitrile	1	1	1	1	1	1	1	1	1	1	1591380	1	1325060	1	2162425	1	1	1	1	1	1	1624967	2141120	1858456	(153.05534, 5225.4937)(135.04518, 8455.181)(150.05504, 7149.4116)(151.05261, 658.8221)(136.05731, 2775.3584)(137.05994, 7490.4937)(167.91508, 1878.5767)(170.087, 398.03)(149.07054, 1821.2168)(159.0435, 1171.4349)
CPD-648	(<i>S</i>)-4-hydroxymandelonitrile	1	1	1	1	1	1	1	1	1	1	1591380	1	1325060	1	2162425	1	1	1	1	1	1	1624967	2141120	1858456	(153.05534, 5225.4937)(135.04518, 8455.181)(150.05504, 7149.4116)(151.05261, 658.8221)(136.05731, 2775.3584)(137.05994, 7490.4937)(167.91508, 1878.5767)(170.087, 398.03)(149.07054, 1821.2168)(159.0435, 1171.4349)
CPD-12889	p-hydroxymandelonitrile	1	1	1	1	1	1	1	1	1	1	1591380	1	1325060	1	2162425	1	1	1	1	1	1	1624967	2141120	1858456	(153.05534, 5225.4937)(135.04518, 8455.181)(150.05504, 7149.4116)(151.05261, 658.8221)(136.05731, 2775.3584)(137.05994, 7490.4937)(167.91508, 1878.5767)(170.087, 398.03)(149.07054, 1821.2168)(159.0435, 1171.4349)
CPD-248	2-formylaminobenzaldehyde	1	1	1	1	1	1	1	1	1	1	1591380	1	1325060	1	2162425	1	1	1	1	1	1	1624967	2141120	1858456	(153.05534, 5225.4937)(135.04518, 8455.181)(150.05504, 7149.4116)(151.05261, 658.8221)(136.05731, 2775.3584)(137.05994, 7490.4937)(167.91508, 1878.5767)(170.087, 398.03)(149.07054, 1821.2168)(159.0435, 1171.4349)
CPD-6362	3-hydroxyindolin-2-one	1	1	1	1	1	1	1	1	1	1	1591380	1	1325060	1	2162425	1	1	1	1	1	1	1624967	2141120	1858456	(153.05534, 5225.4937)(135.04518, 8455.181)(150.05504, 7149.4116)(151.05261, 658.8221)(136.05731, 2775.3584)(137.05994, 7490.4937)(167.91508, 1878.5767)(170.087, 398.03)(149.07054, 1821.2168)(159.0435, 1171.4349)
GERANIAL	geranial	928428	637964	603271	1052530	1066626	987575	522294	866369	503914	611257	575222	605375	520388	482035	503977	1537855	1326066	740136	621406	857141	958952	641791	626865	868429	(153.31303, 1650.45)(156.13734, 3526.4062)(135.1159, 27522.133)(136.11778, 1825.3846)(157.1571, 379.94)(176.68845, 3556.5874)(157.09773, 2924.544)
VANILLIN	vanillin	2014476	1904331	5087740	1418314	8596960	7683108	4092334	3714390	3914152	1	6820215	3725583	7315405	3481675	1961342	7691680	7005198	6628970	2100647	2037465	1643328	796112	5752708	1	(153.48328, 3578.7542)(138.71367, 1113.6901)(153.05603, 46716.71)(154.05347, 3830.6401)(136.90825, 34986.363)(139.05377, 4080.2551)(170.07909, 15450.731)(171.08405, 607.2528)(172.0909, 152.76001)(153.38838, 37608.59)(156.27994, 7311.104)(177.37817, 264.06)(158.70122, 558.2133)
CPD-9016	6,8-dihydroxypurine	449429	382784	296416	151480	1	157586	362222	1	504120	451845	559384	456714	2130407	2172978	2421512	1	154662	417157	280680	183950	183092	5865410	5694008	5845048	(154.04926, 56519.848)(155.0526, 11814.714)(138.10663, 3831.3894)(139.37723, 6600.1494)(159.36711, 1291.1)(160.0707, 5813.21)(139.85234, 3895.1726)(141.38689, 3772.7068)(142.0515, 8984.89)(173.75285, 1566.532)(174.75212, 3759.6724)(175.58833, 2941.1348)(176.0882, 104.42)(156.67683, 1702.364)(157.4359, 4057.4116)(158.0806, 3311.17)(181.19162, 2541.558)(182.05121, 4911.9053)(163.03886, 19837.965)
CPD0-1143	azaguanine	1	2055397	4399659	2028750	3043703	1720498	1381131	4924392	2702236	4937057	4441334	4691780	3149863	3915563	4355768	1549276	1320046	1463359	3684958	3321193	1	1	1645295	5952949	(154.04948, 3715.5327)(155.05246, 1158.2649)(137.03754, 594.2892)(139.0386, 125.295)(153.05524, 3947.9006)(154.0574, 256.51)(136.04475, 3596.1277)(137.37541, 667.7834)(170.0782, 9149.705)(171.08516, 838.055)(172.0848, 159.13)(152.06775, 47625.51)(153.21121, 4639.239)(176.0325, 626.16504)(159.0238, 207.46)
34-DIHYDROXYPHENYLACETALDEHYDE	3,4-dihydroxyphenylacetaldehyde	1	1	5087740	1	8596960	7683108	1	1	1	1	6820215	1	1	3481675	1	7691680	7005198	6628970	1	1	1	1	5752708	4750780	(154.05624, 11708.125)(139.04729, 1069.6816)(153.05606, 84598.734)(154.0538, 6172.6577)(138.05441, 69441.8)(139.05495, 7015.965)(170.08015, 23852.686)(171.08353, 464.715)(172.0972, 155.88)(155.07675, 2853.1848)(157.08203, 7217.502)(178.0477, 168.41)(160.0348, 91.75)
CPD-6442	methylsalicylate	1	1	5087740	1	8596960	7683108	1	1	1	1	6820215	1	1	3481675	1	7691680	7005198	6628970	1	1	1643328	1	5752708	4750780	(154.05624, 11708.125)(139.04729, 1069.6816)(153.05614, 77070.57)(154.05334, 5175.7397)(138.05443, 64991.89)(139.0546, 5907.79)(170.0801, 22840.816)(171.08412, 431.25446)(172.0972, 155.88)(155.07675, 2853.1848)(157.08203, 7217.502)(178.0477, 168.41)(160.0348, 91.75)
DOPAMINE	dopamine	3668681	3433888	3480783	3961445	4702427	3855297	5435081	4354695	4341365	4486078	4034960	4665597	3690604	3726079	4112355	3475783	1	3056883	3714395	4435296	3860931	6170931	5354999	5733484	(154.08525, 38500.2)(155.08751, 3622.8608)(156.08, 255.12)(136.0743, 104574.77)(137.07558, 7527.5796)(138.09006, 882.955)(158.11584, 3317.96)(178.3872, 7168.767)(179.62762, 5362.352)(181.0834, 5013.5615)(162.24915, 1222.61)(163.0723, 231.79)
CPD-9327	vanillylamine	3668681	3433888	3480783	3961445	4702427	3855297	5435081	4354695	4341365	4486078	4034960	4665597	3690604	3726079	4112355	3475783	1	3056883	3714395	4435296	3860931	6170931	5354999	5733484	(154.08525, 38500.2)(155.08751, 3622.8608)(156.08, 255.12)(136.0743, 104574.77)(137.07558, 7527.5796)(138.09006, 882.955)(158.11584, 3317.96)(178.3872, 7168.767)(179.62762, 5362.352)(181.0834, 5013.5615)(162.24915, 1222.61)(163.0723, 231.79)
CPD-862	(+)-camphor	928428	1	1	1052530	1066626	987575	1	1	1	1	1	1	1	1	1	1537855	1326066	1	1	1	958952	1	1	868429	(154.1215, 327.76)(156.1373, 1666.276)(135.1159, 29169.11)(136.11891, 1774.9312)(157.1571, 379.94)(178.12137, 281.642)(157.0976, 196.775)
CPD-10051	(-)-<i>trans</i>-carveol	928428	1	1	1052530	1066626	987575	1	1	1	1	1	1	1	1	1	1537855	1326066	1	1	1	958952	1	1	868429	(154.1215, 327.76)(156.1373, 1666.276)(135.1159, 29169.11)(136.11891, 1774.9312)(157.1571, 379.94)(178.12137, 281.642)(157.0976, 196.775)
CPD-9762	neral	928428	1	1	1052530	1066626	987575	1	1	1	1	1	1	1	1	1	1537855	1326066	1	1	1	958952	1	1	868429	(154.1215, 327.76)(156.1373, 1666.276)(135.1159, 29169.11)(136.11891, 1774.9312)(157.1571, 379.94)(178.12137, 281.642)(157.0976, 196.775)
CPD-4942	(+)-pulegone	928428	1	1	1052530	1066626	987575	1	1	1	1	1	1	1	1	1	1537855	1326066	1	1	1	958952	1	1	868429	(154.1215, 327.76)(156.1373, 1666.276)(135.1159, 29169.11)(136.11891, 1774.9312)(157.1571, 379.94)(178.12137, 281.642)(157.0976, 196.775)
CPD-4941	(+)-<i>cis</i>-isopulegone	928428	1	1	1052530	1066626	987575	1	1	1	1	1	1	1	1	1	1537855	1326066	1	1	1	958952	1	1	868429	(154.1215, 327.76)(156.1373, 1666.276)(135.1159, 29169.11)(136.11891, 1774.9312)(157.1571, 379.94)(178.12137, 281.642)(157.0976, 196.775)
CPD-261	(4<i>S</i>)-perillyl alcohol	928428	1	1	1052530	1066626	987575	1	1	1	1	1	1	1	1	1	1537855	1326066	1	1	1	958952	1	1	868429	(154.1215, 327.76)(156.1373, 1666.276)(135.1159, 29169.11)(136.11891, 1774.9312)(157.1571, 379.94)(178.12137, 281.642)(157.0976, 196.775)
CPD-260	(+)-<i>trans</i>-carveol	928428	1	1	1052530	1066626	987575	1	1	1	1	1	1	1	1	1	1537855	1326066	1	1	1	958952	1	1	868429	(154.1215, 327.76)(156.1373, 1666.276)(135.1159, 29169.11)(136.11891, 1774.9312)(157.1571, 379.94)(178.12137, 281.642)(157.0976, 196.775)
CPD-263	(-)-trans-isopiperitenol	928428	1	1	1052530	1066626	987575	1	1	1	1	1	1	1	1	1	1537855	1326066	1	1	1	958952	1	1	868429	(154.1215, 327.76)(156.1373, 1666.276)(135.1159, 29169.11)(136.11891, 1774.9312)(157.1571, 379.94)(178.12137, 281.642)(157.0976, 196.775)
#NAME?	#NAME?	928428	1	1	1052530	1066626	987575	1	1	1	1	1	1	1	1	1	1537855	1326066	1	1	1	958952	1	1	868429	(154.1215, 327.76)(156.1373, 1666.276)(135.1159, 29169.11)(136.11891, 1774.9312)(157.1571, 379.94)(178.12137, 281.642)(157.0976, 196.775)
CPD-884	6-aminohexanoate	146251488	131536664	133949832	133877024	141550272	133636400	147961808	136952960	1	126842576	126460024	123265168	165703616	164990704	163159488	150585664	139392608	140553152	126205088	130536672	127158464	198507872	197438016	200095632	(154.26102, 13352.7295)(155.0831, 468.285)(114.09102, 5245158.5)(115.09416, 330207.97)(116.09556, 19769.969)(132.10063, 10725.032)(136.07101, 201188.2)(137.06886, 10944.853)
L-2-AMINOHEXANOATE	L-norleucine	146251488	131536664	133949832	133877024	141550272	133636400	147961808	136952960	1	126842576	126460024	123265168	165703616	164990704	163159488	150585664	139392608	140553152	126205088	130536672	127158464	198507872	197438016	200095632	(154.26102, 13352.7295)(155.0831, 468.285)(114.09102, 5245158.5)(115.09416, 330207.97)(116.09556, 19769.969)(132.10063, 10725.032)(136.07101, 201188.2)(137.06886, 10944.853)
ILE	L-isoleucine	146251488	131536664	133949832	133877024	141550272	133636400	147961808	136952960	1	126842576	126460024	123265168	165703616	164990704	163159488	150585664	139392608	140553152	126205088	130536672	127158464	198507872	197438016	200095632	(154.26102, 13352.7295)(155.0831, 468.285)(114.09102, 5245158.5)(115.09416, 330207.97)(116.09556, 19769.969)(132.10063, 10725.032)(136.07101, 201188.2)(137.06886, 10944.853)
CPD-6181	&beta;-alanine betaine	146251488	131536664	133949832	133877024	141550272	133636400	147961808	136952960	1	126842576	126460024	123265168	165703616	164990704	163159488	150585664	139392608	140553152	126205088	130536672	127158464	198507872	197438016	200095632	(154.26102, 13352.7295)(155.0831, 468.285)(114.09102, 5245158.5)(115.09416, 330207.97)(116.09556, 19769.969)(132.10063, 10725.032)(136.07101, 201188.2)(137.06886, 10944.853)
LEU	L-leucine	146251488	131536664	133949832	133877024	141550272	133636400	147961808	136952960	1	126842576	126460024	123265168	165703616	164990704	163159488	150585664	139392608	140553152	126205088	130536672	127158464	198507872	197438016	200095632	(154.26102, 13352.7295)(155.0831, 468.285)(114.09102, 5245158.5)(115.09416, 330207.97)(116.09556, 19769.969)(132.10063, 10725.032)(136.07101, 201188.2)(137.06886, 10944.853)
CPD-7084	phenylthiourea	1	1	1	1	283674	1	3144326	117306	4522034	4769668	1	1	1567981	5499384	2709947	154642	422142	1	198746	2641886	511547	2054203	3110730	1443487	(154.36993, 1355.8544)(155.29108, 5905.695)(157.0356, 1823.67)(153.97287, 4238.0684)(156.54752, 1370.8418)(157.049, 758.72)(171.38295, 4056.6104)(172.77652, 1420.093)(173.9048, 2164.875)(174.0767, 2512.41)(176.78075, 3042.3206)(178.36617, 1718.87)(179.0338, 2955.91)
CPD0-2060	2,6-diaminopurine	144503	137263	131612	166202	225740	170632	196353	1	1	1	1	152272	145799	1	152974	210293	220416	171110	135920	152623	147798	276986	248572	265266	(154.86148, 3866.7686)(155.48262, 1961.1201)(156.0889, 254.62)(153.08958, 3276.5156)(154.0854, 134.92)(171.74756, 10112.067)(172.86768, 7319.0493)(174.6149, 2087.6)(176.75392, 7352.4507)(179.15074, 4680.805)(179.47696, 6582.9897)
PYRROLINE-HYDROXY-CARBOXYLATE	(3<i>R</i>,5<i>S</i>)-3-hydroxy-1-pyrroline-5-carboxylate	237148	223628	271081	1	526628	411644	172098	202229	243991	158791	166609	171054	250129	151084	169623	217933	178049	182505	1	195768	246690	168281	200398	171460	(155.03218, 2063.4119)(113.03374, 15176.064)(115.03851, 5993.782)(128.0342, 198.26)(147.97314, 20492.629)(149.4507, 2564.8235)(151.07777, 2086.825)(129.68105, 12534.218)(132.72047, 1055.9467)(137.02393, 2997.2034)(129.69801, 9868.256)
CPD-65	benzylthiocyanate	1	1	1	1	1	1	1	1	1	1	1	1	1	1	1	1	1	1	1	1	1	383458	366568	398669	(155.03319, 8553.59)(167.3962, 9096.477)(169.0587, 1051.61)(171.0642, 1165.57)(175.01744, 64802.97)(176.02156, 3104.6301)
CPD0-1234	isoleucine tetrazole	1	1	1	1	1	1	1	1	1	1	1	1	196350	1	208422	1	1	1	1	1	1	256388	354426	273656	(155.11635, 6297.948)(160.13191, 13674.106)(174.1478, 1613.92)(180.51103, 11506.174)(183.11159, 9943.633)
CPD-8844	(3<i>E</i>)-4,8-dimethylnona-1,3,7-triene	1	1	1	361658	997788	814718	1	1	1	1	1	1	508171	1	1	979873	1135182	995251	747856	734475	736172	1	1	1	(155.15355, 150.745)(173.13039, 16469.9)(174.13452, 587.36334)
CYSTAMINE	cystamine	310939	246197	270400	285597	315520	244015	241280	260157	312134	191581	273851	221496	1	643461	652802	1	280761	276830	1	325927	314525	161893	628267	681904	(155.48576, 7140.1904)(155.87857, 5820.787)(160.0639, 809.92)(173.23595, 5298.1973)(174.99904, 5506.114)(177.22752, 40769.95)(179.19095, 496.6586)
HIS	L-histidine	752651	789546	748900	673229	930667	6073790	1	533123	263395	4736043	4587632	1337726	5894352	4641760	4008629	811586	836807	1	1	641242	790248	3481877	3545311	3086910	(155.50888, 5224.3887)(158.32758, 327.55252)(160.0798, 128.18)(137.33324, 9676.855)(138.05444, 9456.07)(139.0481, 414.93)(156.20216, 11117.854)(157.07986, 1836.0975)(158.0831, 115.64)(140.06929, 40748.984)(141.35922, 7301.621)(143.0806, 3826.31)(175.21812, 724.5239)(175.10449, 787.72003)(156.46544, 6321.157)(180.0651, 99948.086)(181.06781, 13775.497)(162.50388, 3187.2952)(165.05885, 5047.553)
CPD-13172	6-hydroxy-2-cyclohexen-one-carboxylate	625443	138618	450356	298040	838478	749523	385141	239072	410409	457717	438078	388434	716884	639662	629812	972216	422899	168641	94373	333634	394991	783306	404212	419457	(155.62245, 5237.5425)(156.0448, 118.15)(137.40628, 4714.8906)(139.0281, 964.18396)(140.03143, 331.10666)(158.1866, 7558.6294)(158.644, 883.12)(139.39622, 3762.4954)(173.6934, 6586.5103)(176.19786, 10317.76)(176.19388, 10785.544)(159.11182, 3515.0244)(159.81985, 4757.7925)(178.52304, 651.135)(162.10066, 4652.104)(163.0178, 3026.49)
CPD-8853	2-descarboxy-cyclo-dopa	5233418	3832925	3220031	3979032	4751441	3924027	2462315	2587280	4606007	3249078	5212121	5062866	3929254	3335688	1	3465041	5358648	5217168	1920210	4611385	3810483	4866806	4370638	4049862	(155.73141, 23402.512)(155.75513, 4721.877)(158.09549, 998.685)(136.07106, 138350.42)(137.07144, 10365.436)(154.08617, 19372.799)(155.08537, 2545.2031)(156.08, 207.87)(136.82706, 81398.875)(137.07515, 7258.932)(172.82881, 15217.445)(172.1089, 204.68)(156.84793, 3012.0222)(158.1153, 7026.5303)(176.3307, 9074.363)(180.0815, 5460.9365)(181.08423, 6181.6626)(161.12231, 3568.281)(162.371, 2016.218)(16…
IMIDAZOLE-PYRUVATE	imidazole-pyruvate	1219338	4761479	2861407	1331390	6155735	1	265420	1	5884932	1	6070932	193244	1720929	2427927	1592171	368399	3308122	722102	270990	3704793	1809263	2161323	721090	9904965	(155.83517, 1212.49)(156.0338, 536.875)(138.02736, 2518.0288)(140.0343, 10102.189)(158.0458, 550.39667)(139.28374, 9003.094)(139.0372, 136.83)(140.0345, 11000.92)(172.49559, 2520.1262)(173.64517, 486.40286)(153.0557, 59704.41)(154.05383, 4944.309)(176.27232, 877.0499)(159.58447, 505.1186)
DITHIOERYTHRITOL	dithioerythritol	118297	241867	95072	90431	121795	100962	88557	223717	292489	190867	196763	178843	230777	1	1	93227	137942	144390	174990	92101	188281	381395	246488	414505	(155.91772, 4099.5444)(158.0019, 26752.27)(159.01128, 722.4525)(141.61783, 3083.8586)(156.01775, 1719.0646)(142.09819, 12178.689)(143.00113, 131598.38)(177.0427, 415.29)(154.89223, 2964.9377)(179.19879, 17603.27)(180.99126, 5121.016)(162.88647, 1224.3206)(162.48566, 805.9313)(162.98032, 1423.1951)
CPD-8933	chlorosuccinate	1156933	750126	670722	729428	773891	734828	734610	694201	147037	693667	1	684716	729966	1	776243	1235421	771052	666057	691883	783382	713457	718514	804101	755736	(155.97473, 7928.1)(137.96324, 5489.376)(132.97206, 1434.9164)(171.91447, 6973.87)(174.48177, 459590.16)(175.01761, 557142.6)(153.997, 4071.6697)(173.45682, 5770.3174)
CPD-9451	2-isopropylmaleate	554708	656212	303728	497716	625286	500584	472962	406131	261710	582431	267279	238065	1	229055	227808	620617	673713	650143	590016	433320	551907	332556	535855	570545	(156.04483, 6981.346)(157.0373, 525.95)(138.6971, 2636.311)(141.03876, 17340.69)(160.05537, 15044.573)(161.41269, 9619.672)(162.0592, 5557.5303)(140.21786, 4370.2437)(141.75957, 491.15714)(175.28683, 15142.195)(157.84306, 10822.451)(158.07191, 5060.022)(159.06903, 4795.36)(180.62799, 2888.6387)(164.74521, 2049.1458)(165.8904, 3094.5728)(166.0333, 3845.32)
CPD-670	3-(pyrazol-1-yl)-L-alanine	1	1	1	1	1	6073790	1	1	1	4736043	4587632	1	5894352	4641760	4008629	1	1	1	1	1	1	3481877	3545311	3086910	(156.07214, 12419.571)(158.74489, 263.39667)(160.0798, 128.18)(156.4775, 16286.016)(157.08116, 1989.8168)(140.06976, 78440.734)(141.35922, 7301.621)(143.0806, 3826.31)(173.77342, 585.37335)(174.102, 427.78)(156.76173, 11080.106)(180.0656, 25027.256)(181.06934, 2269.7)(163.0556, 2011.5846)(165.05667, 6513.7153)
BACIMETHRIN	bacimethrin	1	1	1	1	1	6073790	1	1	1	4736043	4587632	1	5894352	4641760	4008629	1	1	1	1	1	1	3481877	3545311	3086910	(156.07214, 12419.571)(158.74489, 263.39667)(160.0798, 128.18)(156.4775, 16286.016)(157.08116, 1989.8168)(140.06976, 78440.734)(141.35922, 7301.621)(143.0806, 3826.31)(173.77342, 585.37335)(174.102, 427.78)(156.76173, 11080.106)(180.0656, 25027.256)(181.06934, 2269.7)(163.0556, 2011.5846)(165.05667, 6513.7153)
3-SULFINOALANINE	3-sulfino-L-alanine	2765075	2375713	2195647	2310221	2418309	2264046	2250907	2160575	2216799	2229337	2123079	2224206	2107907	1	2181978	2607860	2419962	2133054	2217300	2257865	2218329	2183576	2392251	2160462	(156.48042, 8970.43)(157.00313, 8774.48)(137.99057, 78.32428)(153.00922, 534.34863)(154.00813, 81.37)(174.43651, 356.0855)(175.03485, 320.4)(157.0305, 78.07)(178.99306, 7074.975)(179.98943, 17661.643)(158.97377, 93987.0)(161.9235, 1444.305)(161.9792, 2266.41)
CPD-10210	4-hydroxy-5-methyl-2-propyl-3(2H)-furanone	1182943	502287	514041	442850	1644136	1	1386892	382227	193896	1046892	333380	1	1003272	1570845	1122305	407635	1311928	420217	454982	1280108	1326707	807970	1633167	886477	(156.69821, 7352.907)(158.26427, 14166.05)(159.28574, 1182.014)(160.0872, 113.94)(140.06946, 28006.834)(141.07233, 5754.217)(143.0833, 2105.26)(158.75575, 5579.233)(160.09242, 915.11993)(161.0917, 194.83)(142.08481, 17381.586)(143.08592, 2162.1628)(174.34175, 4580.832)(179.12248, 1997.4066)(156.41759, 5009.619)(157.09836, 747.56)(181.68677, 14392.442)(182.93686, 5860.6313)(183.0729, 143.09)(184.0…
CPD-8819	2,2'-dipyridyl	518412	479540	404431	632601	987680	575906	799630	262858	457462	548147	471366	390149	421794	383377	426169	639330	438098	371104	437203	965846	823745	410764	390090	433522	(156.8201, 34476.95)(157.8904, 6289.328)(158.93968, 4715.1323)(161.08662, 2204.155)(176.27429, 9857.536)(179.11803, 15743.95)(180.19006, 5698.3945)(181.86661, 2532.4626)(183.07076, 91.995)
DITHIOTHREITOL	L-dithiothreitol	1	241867	1	1	1	1	1	223717	292489	190867	196763	178843	230777	1	1	1	1	1	174990	1	188281	381395	246488	414505	(157.00897, 5955.66)(158.00188, 20941.248)(159.01128, 722.4525)(139.002, 11898.26)(159.0147, 177.98)(141.91025, 5894.64)(143.00114, 5028.2437)(156.03389, 1269.1083)(182.9992, 279.795)(164.15273, 1299.1959)(164.98569, 314.255)
CPD-406	N-methylethanolamine phosphate	3506330	650868	2245492	2550071	574859	373017	512424	357503	2256204	1	330526	2322699	1867106	1861783	1959735	1	2427513	2087435	2216191	1860699	2276515	5327425	5366978	5193991	(157.03201, 363.97403)(156.33969, 4289.026)(157.0358, 191.9125)(138.34436, 4599.7437)(139.69843, 944.73505)(140.0315, 222.295)(172.74255, 5233.9473)(176.56886, 22941.158)(177.06865, 20746.967)(154.04921, 150537.83)(155.0526, 11637.633)(182.0279, 753.54)(159.00343, 19364.824)(160.00418, 1021.39276)
INDOLEYL-CPD	(indole-3-yl)acetonitrile	1	479540	1	1	987680	575906	799630	1	457462	548147	471366	390149	421794	383377	426169	639330	438098	371104	437203	1	1	410764	390090	433522	(157.07062, 43643.977)(158.07207, 7592.645)(159.08267, 3365.8418)(160.08646, 1088.68)(180.23169, 1793.2455)(182.06604, 3052.7842)
CPD-237	(indol-3-yl)acetamide	1	1	1	1	1	1	1	1	1	1	513208	1	556972	1	377963	1	1	1	431655	1	1	416313	1	425868	(157.07077, 39165.203)(158.07196, 6415.7715)(179.09602, 2086.9973)(159.083, 2287.74)(194.11629, 13933.754)(199.74635, 3423.9133)(200.07874, 2482.5298)(180.73285, 2140.4333)(182.06595, 3246.985)
CPD-9499	3,5-dimethoxyphenol	800948	1007943	1044076	1170637	1334354	1118826	1465953	1109195	946275	710174	992928	1129840	853431	824302	823008	1	1	655773	980224	897440	979102	1297485	1643068	1704783	(157.82431, 502.46)(138.056, 2635.2053)(139.06035, 1499.754)(141.0679, 110.94)(155.90767, 995.2266)(137.05965, 5098.732)(138.0547, 345.3025)(139.0497, 456.54)(174.50035, 459.816)(154.08527, 34932.996)(155.08766, 3353.2424)(180.82605, 4396.1724)(181.06013, 1546.8434)(159.04364, 304.97)
CPD-10207	(2E)-4-hydroxy-5-methyl-2-propylidene-3(2H)-furanone	800948	1007943	1044076	1170637	1334354	1118826	1465953	1109195	946275	710174	992928	1129840	1	824302	823008	1	1	655773	1	897440	979102	1297485	1643068	1704783	(157.82431, 502.46)(138.056, 2635.2053)(139.06035, 1499.754)(141.0679, 110.94)(155.90767, 995.2266)(137.05971, 5119.5127)(138.0547, 345.3025)(139.0497, 456.54)(174.50035, 459.816)(154.08527, 34704.707)(155.08763, 3393.3557)(180.81161, 4603.522)(181.06013, 1546.8434)(159.04364, 304.97)
CPDQT-27	6-(methylsulfanyl)-2-oxohexanoate	296724	566385	500171	312614	1	290042	222486	189012	249398	316694	189157	248862	2119098	2103431	85031	696567	573281	904346	300660	343682	312323	169493	177149	265631	(158.03413, 614.73663)(180.90706, 1881.3529)(160.08458, 7962.036)(162.04034, 13735.805)(194.08037, 83220.234)(196.95255, 5312.57)(197.9105, 13169.118)(176.93858, 6055.8906)(177.69955, 13557.081)(180.0666, 6715.8564)(198.03593, 628.7138)
CPD-1905	(+)-neomenthol	1067969	1	994230	1235608	1590225	1379105	1073531	1033156	1046440	1153518	1058147	1186174	670221	1	150126	1	1237714	1132749	1245783	1169426	1238204	1	849127	759402	(158.1526, 169.23)(179.14153, 17490.127)(180.1442, 1269.2826)(161.13136, 18153.41)(162.13458, 1321.1548)
CPD-4944	(+)-isomenthol	1067969	1	994230	1235608	1590225	1379105	1073531	1033156	1046440	1153518	1058147	1186174	670221	1	150126	1	1237714	1132749	1245783	1169426	1238204	1	849127	759402	(158.1526, 169.23)(179.14153, 17490.127)(180.1442, 1269.2826)(161.13136, 18153.41)(162.13458, 1321.1548)
CPD-4945	(+)-neoisomenthol	1067969	1	994230	1235608	1590225	1379105	1073531	1033156	1046440	1153518	1058147	1186174	670221	1	150126	1	1237714	1132749	1245783	1169426	1238204	1	849127	759402	(158.1526, 169.23)(179.14153, 17490.127)(180.1442, 1269.2826)(161.13136, 18153.41)(162.13458, 1321.1548)
#NAME?	#NAME?	1067969	1	994230	1235608	1590225	1379105	1073531	1033156	1046440	1153518	1058147	1186174	670221	1	150126	1	1237714	1132749	1245783	1169426	1238204	1	849127	759402	(158.1526, 169.23)(179.14153, 17490.127)(180.1442, 1269.2826)(161.13136, 18153.41)(162.13458, 1321.1548)
CPD-7980	(<i>S</i>)-(-)-citronellol	1067969	1	994230	1235608	1590225	1379105	1073531	1033156	1046440	1153518	1058147	1186174	670221	1	150126	1	1237714	1132749	1245783	1169426	1238204	1	849127	759402	(158.1526, 169.23)(179.14153, 17490.127)(180.1442, 1269.2826)(161.13136, 18153.41)(162.13458, 1321.1548)
2K-ADIPATE	2-oxoadipate	1	1	1	119749	77803	129144	1	1	1	1	1	1	1	1	76447	127469	126937	108235	70064	84488	82495	1	92558	1	(158.85756, 3362.28)(143.01607, 2006.5668)(144.0173, 448.17)(163.03836, 6896.736)(164.0412, 268.49)(179.31354, 2293.3076)(179.0582, 413.96)(158.54492, 6455.694)
CPD-7614	1-naphthaldehyde	1822234	535333	1	434769	1	324589	360320	270262	1658007	1156971	595312	562083	210431	510831	279466	652247	1	1041147	428931	1	1447534	266145	515990	220298	(158.9402, 2368.1653)(139.44992, 7767.6797)(141.19847, 4107.4976)(141.726, 1487.0234)(159.01706, 3784.9543)(161.57596, 1088.735)(162.0767, 10010.84)(139.58786, 7139.896)(143.0718, 4146.56)(176.09702, 5899.428)(178.60449, 1813.115)(157.68552, 5777.9863)(157.91576, 3728.445)(159.0894, 2996.06)(181.8875, 3938.796)(183.39339, 4014.0098)(184.0638, 293.27)(162.8181, 26805.959)(164.2938, 4808.9775)(165.…
INDOLE_ACETALDEHYDE	(indol-3-yl)acetaldehyde	1304180	428477	426108	673561	2598212	759670	568593	580589	600006	2784356	1146104	1274294	5017958	324602	2954113	3925952	1	3810106	209414	214839	1577103	7716329	7576753	7257612	(159.13335, 2318.8582)(160.07043, 560.01996)(141.58719, 3396.6204)(143.05815, 188.63335)(160.27489, 5100.1514)(162.58286, 12138.966)(163.0837, 6903.1)(143.46881, 7163.463)(145.74547, 2115.2266)(177.81715, 22455.967)(180.61105, 4254.3687)(159.5265, 11391.455)(161.59912, 981.8525)(184.30222, 4518.439)(185.40031, 3330.491)(186.62628, 2034.9023)(186.071, 94.39)(165.14774, 7136.9766)(168.56238, 2072.8…
CPD-3721	cysteamine S-phosphate	218070	61816	379956	831337	1	804394	666059	875779	286123	121460	364876	245659	406360	1023284	949454	1494021	873933	730821	141048	929490	716096	7612	690829	1017195	(159.98962, 1989.265)(142.97588, 277.49332)(158.00208, 423664.97)(160.9993, 4952.06)(139.98555, 8813.35)(140.98529, 1752.25)(176.02014, 37315.53)(177.0258, 7621.221)(156.00839, 5719.7153)(183.9838, 65.1)
CPD-8001	calystegine A3	625373	1064952	1238161	666452	768508	519236	2146468	1401117	1670099	1	1644412	1615128	6498879	4296604	4286117	456927	1314386	949635	2679143	617534	2194275	7944617	7975273	8202706	(160.09526, 2767.6892)(161.105, 250.52)(142.08533, 61846.5)(143.08723, 4234.2725)(144.0775, 255.23)(162.8604, 3441.4375)(144.10019, 10937.396)(148.1093, 2452.66)(181.89096, 1921.9075)(181.1339, 5512.57)(164.46692, 3422.7812)(183.73596, 7046.6353)(184.8349, 277.05502)(168.25049, 4905.697)(169.0854, 176.66)
CPD-205	pimelate	826587	3151406	6347210	1066554	933092	1257810	3490399	1844352	1859852	1352441	1365334	1545225	3840660	3449348	3417327	3284867	3386062	1014427	691389	1078141	1753969	1800666	3194698	3578961	(160.17458, 1076.4122)(141.59612, 2178.0686)(143.93303, 2743.8398)(160.14, 2406.455)(160.0656, 71.57)(141.0553, 2834.1997)(142.0488, 138.73)(179.85071, 25165.22)(180.0998, 19190.75)(181.1045, 2576.09)(159.75209, 3637.169)(162.0899, 27907.02)(181.23114, 5128.312)(182.0494, 455.13)(163.03815, 49574.67)(164.3313, 2770.3928)(165.0539, 172.95)
CPD-9269	alliin	1	1	1	1	1	1	1	1	1	1	1	1	1	1	1	1	1	1	1	1	1	1453689	1	13361040	(161.0273, 400.89)(161.0488, 2530.13)(199.08011, 435.385)(200.079, 197.33)(177.06921, 164667.9)(178.0718, 13250.814)(201.0419, 23612.965)(184.0268, 1017.26)
CPD-85	1,2-dihydroxy-5-(methylsulfanyl)pent-1-en-3-one	368570	274922	274243	500184	541381	515272	194264	157998	485912	211944	482609	1	137190	130324	144538	210811	262994	1	274635	286610	288900	323058	274821	255153	(161.0276, 1200.4427)(143.01683, 8921.246)(144.01988, 1481.541)(145.01292, 781.04)(163.60828, 11670.258)(166.03398, 1088.335)(147.02254, 169467.34)(148.40884, 11136.661)(149.02312, 3924.3076)(179.81421, 1386.61)(182.0655, 1011.48)(161.3532, 3585.6519)(162.05795, 197.55)(187.0182, 2419.4004)(167.99895, 1043.9299)
CPD-9307	(+)-<i>trans</i>-isoalliin	18029400	14290498	13787346	15092990	2554659	14011926	13495972	14252259	14149414	13813369	13311959	13843959	13443668	800569	13567752	17515586	14226293	13547334	13673679	13633845	13709619	1453689	13826954	13361040	(161.0278, 710.92346)(162.0317, 61.38)(181.05524, 736.84247)(161.3561, 2782.503)(199.07985, 930.1821)(200.07898, 371.27612)(177.06903, 169878.64)(178.07155, 13635.649)(179.06767, 228.97667)(201.04198, 26916.186)(184.02661, 2644.7395)(187.02226, 70.53)
CPD-13135	indole-3-carboxylate	827082	253637	755180	563370	296867	514915	5328525	639040	475721	213813	630987	672597	8327736	2879754	8104220	1802488	1601750	475751	4479115	1	307659	569957	1	542752	(161.04059, 1734.34)(165.0569, 1680.45)(143.61713, 5636.812)(146.76892, 6837.7583)(147.0417, 9354.92)(163.17047, 10281.486)(164.25687, 6553.29)(165.5589, 15252.404)(143.03395, 41430.37)(144.03917, 5358.484)(180.12555, 80423.33)(182.18755, 21719.463)(182.4154, 12306.048)(183.0807, 1830.8)(161.42047, 5889.6367)(163.82143, 3708.0925)(164.0691, 7906.45)(184.03487, 2788.335)(167.02429, 144.785)
CPD-17436	<i>S</i>-<i>trans</i>-1-propenyl-L-cysteine	2400341	2928512	1	1	4618054	2640466	1	497605	1	1	1	1	1	1	1	1502797	1	1	710353	1	1837342	1	1	1779361	(161.05096, 3796.851)(162.0623, 103.380005)(143.03668, 23666.576)(162.06065, 421.32)(145.048, 17352.39)(149.0515, 62.0)(179.08208, 19793.805)(180.0911, 2134.324)(181.083, 116.24)(162.294, 7705.374)(164.73793, 13924.703)(165.0698, 24393.82)(166.0706, 1194.56)(184.59732, 9242.23)(166.2825, 931.3125)
CPD-15755	2-amino-4-methyl-5-hydroxyethylthiazole	2444040	1183705	1029853	1131602	1	580957	1	2347482	3120497	1	3098722	3294765	7587845	1	7541563	1127535	852853	1	1	381538	1308141	10059187	9311436	9544861	(161.11308, 3828.6301)(162.35608, 4795.9893)(163.65872, 2139.58)(142.16045, 14892.141)(144.73595, 54945.355)(145.04878, 81440.766)(161.1362, 6977.8105)(165.06824, 4135.3784)(146.05644, 13016.019)(147.05351, 473.96)(180.28912, 16992.324)(181.09555, 20880.371)(159.90541, 2493.8499)(160.32637, 2237.315)(184.79865, 708.84375)(164.04254, 5526.2246)
CPD-404	<i>N</i>-methyl-L-glutamate	2031163	1856502	2477577	450396	213627	5146807	5327446	2359644	526451	3443105	4841372	5144666	140673	419276	681426	1	509199	596847	246608	5065034	320600	1195811	217885	1027991	(161.36899, 9596.624)(164.07034, 490.25998)(164.0685, 8360.01)(142.74675, 32814.78)(144.5093, 5326.315)(162.00998, 4302.9414)(163.74553, 2546.3801)(166.0843, 7309.26)(145.3839, 14061.829)(147.70781, 6850.4653)(180.05362, 63226.137)(181.2875, 25098.496)(182.95438, 4744.927)(183.1059, 692.26)(161.73465, 6673.08)(163.21571, 18551.652)(184.82051, 1461.4619)(187.0602, 472.56668)(188.0652, 333.96)(168.…
CYS-GLY	L-cysteinylglycine	1791791	1443849	1429967	1316810	1084882	1203637	1136499	1252765	1272043	1405904	1416999	1353303	1	1386837	375938	1749966	1355335	1473039	1313604	1284628	1369722	1316516	1248294	1291283	(161.45694, 497.67648)(165.0312, 663.76)(183.04971, 507.42404)(161.03812, 2066.0515)(199.17047, 630.58136)(200.07869, 259.94864)(179.80424, 2217.1155)(181.288, 1123.6759)(182.06612, 423.385)(203.53314, 62.835)(184.1567, 2729.8516)(187.01904, 208.76537)
N5-METHYLGLUTAMINE	<i>N</i><sup>5</sup>-methyl-L-glutamine	354135	347412	542358	461301	439734	1	1	471126	402039	325937	1217101	406580	563575	333246	493886	1	1	529922	359768	424179	426860	318678	1	539665	(161.91243, 14027.835)(163.2471, 15306.796)(142.9451, 1742.228)(145.5809, 6420.7725)(147.0893, 3493.93)(161.7838, 3337.982)(165.1008, 20720.35)(143.45932, 5012.095)(145.58482, 1039.95)(178.58705, 18650.521)(180.63036, 1896.5616)(162.19206, 8629.671)(161.60995, 887.99)(185.9911, 2163.739)(186.75047, 5126.79)(187.5836, 5724.375)(166.31827, 1427.5107)(169.24132, 454.69833)(170.0719, 169.96)
S-ALLANTOIN	(<i>S</i>)-(+)-allantoin	1162775	2071556	1	469863	3017150	527320	745935	1	1	692689	154943	1	992860	740102	964080	835463	1	1	1	1	1	532821	113140	484220	(162.05103, 2313.3274)(141.0354, 8813.72)(143.03625, 16364.633)(160.05379, 37868.902)(161.41829, 3257.7744)(162.0543, 66.38)(141.76788, 11614.223)(178.94879, 15989.251)(179.943, 7515.7397)(181.08603, 523.536)(158.80254, 4576.956)(160.67027, 5733.242)(184.50847, 9607.433)(185.24126, 9018.615)(164.52754, 5382.8735)(166.0332, 1907.85)
CPD0-954	1,4-naphthoquinone	1	1	1	1	238358	1	1	1	1	1	1	1	1	1	1	1	1	1	1	1	1	533029	1	448128	(162.0518, 1387.55)(143.0333, 94635.6)(144.03749, 6547.4663)(162.05525, 4152.345)(163.05815, 3761.605)(145.0485, 14187.195)(176.07027, 15319.011)(159.06477, 3887.8535)(161.06856, 7647.0)(183.69939, 1490.63)(185.04141, 35581.8)(186.0448, 2464.265)(163.0181, 2439.34)
CPD-9298	<i>S</i>-allyl-L-cysteine	2400341	2928512	983515	713205	4618054	2640466	1173214	497605	696553	327447	576286	464763	506146	1943156	1825586	1502797	506516	1	710353	1	1837342	7078539	7127984	1779361	(162.05334, 6487.0913)(164.88464, 20810.041)(166.049, 42267.52)(143.1377, 21590.225)(147.0426, 13067.23)(162.55988, 1787.0176)(145.00072, 101882.14)(147.26862, 5584.2065)(179.08203, 15922.828)(180.09093, 1967.6421)(181.083, 116.24)(161.936, 9041.218)(164.73793, 13924.703)(165.0698, 24393.82)(166.0706, 1194.56)(184.4202, 8297.425)(185.0435, 701.0)(168.81485, 2181.247)
CPD-6421	methylcinnamate	1	1	3955202	1	1	1	1	8913917	1	1	1	1	3218734	3027999	1	1541530	1	6779191	1	1	1	1	1	2154206	(162.0669, 107.87)(146.05956, 9114.743)(165.65561, 789972.8)(166.655, 76580.24)(168.08994, 21202.184)(147.9066, 9805.406)(149.0747, 6868.6797)(150.0772, 15282.36)(180.10005, 102559.96)(181.10336, 32581.648)(162.42427, 48965.11)(163.49498, 7658.4126)(164.1082, 248.83)(186.48973, 14423.864)(188.27034, 28043.713)(189.07135, 8226.577)(169.72021, 36845.34)(170.05804, 15473.068)(171.06189, 559.365)(172…
CPD-468	L-2-aminoadipate	2031163	1856502	2477577	1	213627	1	1	2359644	1	3443105	1	1	1	419276	1	1	1	1	1	1	1	1195811	1	1027991	(162.06703, 7841.887)(163.0719, 125.35)(164.0685, 8360.01)(142.04938, 20081.215)(143.0503, 63.585)(162.07242, 10388.242)(144.06422, 31896.143)(148.07205, 8174.209)(180.09991, 141495.58)(181.09906, 41497.098)(183.10994, 6658.884)(161.64185, 4262.103)(163.2911, 28218.775)(185.80978, 751.22)(187.0602, 472.56668)(188.0652, 333.96)(169.33377, 1366.3713)(170.0479, 855.26404)
CPD-13720	3-dimethylselenopropionaldehyde	1	876143	3081580	1	1	3372858	3617988	1	1189653	1	1	1	593419	1	1	4927564	1581133	1962882	3334208	1	1	2332757	1194993	1	(162.2737, 5609.7285)(174.415, 266948.7)(175.73364, 189193.66)(176.02005, 35477.016)(146.60114, 16102.505)(151.9932, 169.61249)(155.50473, 2457.5874)(156.0083, 5563.72)(157.0057, 16747.89)(166.75854, 6471.175)(176.0202, 36165.03)(177.0275, 5788.98)(143.99858, 20217.605)(145.00415, 4821.435)(152.14516, 3188.033)(156.0084, 5350.22)(159.0217, 192.45)(191.59135, 407.6191)(189.0403, 1891.89)(164.68878…
CPDQT-343	(<i>E</i>)-6-(methylsulfanyl)hexanal oxime	1	3053633	12906877	1	1	1	1	1	1947783	1	7040178	2067537	3071563	1903624	5505254	1	7202957	12576723	8948547	9126833	8233881	1	3835836	1	(162.30441, 27974.354)(164.88455, 63802.55)(143.50412, 42671.367)(146.5766, 1915.4183)(148.0722, 9409.61)(165.09508, 1256.76)(144.08, 197578.3)(145.08145, 25996.324)(146.081, 2383.3667)(180.97499, 12248.461)(182.11983, 3610.3599)(184.11844, 229.575)(163.64581, 4536.1265)(164.11154, 208.44)(186.14859, 2173.4915)(187.32452, 7240.849)(188.40741, 46187.43)(189.07549, 43408.293)(167.28305, 5216.761)(1…
CPD-1774	4-methylene-L-glutamate	1	255636	1	1	227793	1	810581	1	1	1	1	1	1	1	1	1	1241309	1	1	1	1	1	2798643	128099	(162.5536, 1071.9451)(140.03397, 5712.896)(160.05469, 16744.588)(161.05484, 2987.9248)(142.8784, 25839.662)(145.05005, 48128.844)(145.7204, 42577.223)(146.0563, 13008.53)(178.08238, 23807.75)(179.33379, 9250.18)(180.09, 11047.335)(159.23843, 3889.6035)(160.57361, 5605.9375)(162.07895, 7354.775)(163.0838, 7519.29)(184.54121, 4317.72)(185.2917, 5461.645)(164.19208, 465.84167)(166.36786, 1967.5)
DIETHYLPYROCARBONATE	diethylpyrocarbonate	1	1	4109832	628309	1341541	1511459	1	8835403	8646835	7629027	1	9143490	9144167	9741490	1	4365011	1	1	5845356	5786680	1	3981544	3882145	3394188	(162.63853, 4676.2666)(164.05225, 6903.6597)(144.29132, 1652.1)(148.0549, 851.95)(149.0515, 414.94)(164.1884, 7893.008)(166.81876, 3042.195)(145.31612, 155799.39)(146.05443, 24424.35)(147.0549, 2218.4429)(148.0576, 197.45)(182.0295, 26268.271)(183.02711, 12183.078)(184.0954, 21131.79)(163.57994, 80723.48)(164.68166, 10936.878)(164.07376, 937.03)(185.04109, 19463.4)(167.69841, 801.00665)
CPD-10272	<i>N,N</i>-dihydroxy-L-isoleucine	9191349	7147711	7952037	9612018	18007104	11404798	933886	8799095	1	9129346	8169121	8155887	1	8359510	6858053	9802491	7381538	6778652	8455806	9484269	9301269	8158945	8332251	10419705	(162.80434, 202543.55)(163.87929, 21871.5)(164.07329, 1023.8367)(144.06415, 34179.89)(145.0679, 9311.683)(146.0648, 266.8)(163.08531, 19809.162)(164.0921, 215.54)(146.02516, 39815.316)(146.06575, 427.12)(182.11557, 8261.56)(165.44284, 4776.705)(167.1162, 11034.43)(185.06485, 540744.6)(186.06647, 143082.56)(169.44188, 14610.242)(171.0626, 1924.9658)
CPD-9275	allicin	3659774	3214856	3235102	3610187	4541248	3509485	4036332	3452385	3431284	3344869	3020966	3278296	2504742	3268210	3137372	4144218	3398237	1380226	3364288	3375330	3147827	1	3186304	2505927	(163.01741, 21521.797)(144.50562, 2592.7869)(166.14629, 100.20875)(145.0133, 107.94)(183.0497, 838.6465)(184.04393, 457.95474)(166.03384, 609.1826)(185.00243, 8345.827)(170.65959, 576.09143)(170.99207, 2670.1401)
CPD-9306	thiosulfinate	3659774	3214856	3235102	3610187	4541248	3509485	4036332	3452385	3431284	3344869	3020966	3278296	2504742	3268210	3137372	4144218	3398237	1380226	3364288	3375330	3147827	1	3186304	2505927	(163.01741, 21521.797)(144.50562, 2592.7869)(166.14629, 100.20875)(145.0133, 107.94)(183.0497, 838.6465)(184.04393, 457.95474)(166.03384, 609.1826)(185.00243, 8345.827)(170.65959, 576.09143)(170.99207, 2670.1401)
CPD-7418	coumarinate	1	8312504	6638233	1556400	2187662	1	3681598	3662626	3764481	2316943	2248435	2486175	3924674	3721662	4377764	2798353	2949384	2901019	3474866	1	3506734	1	4011002	3115435	(163.03812, 63348.65)(164.04242, 5704.4136)(148.03717, 602.4273)(166.05345, 451.98398)(147.70584, 1015.8499)(148.0381, 499.86)(181.92886, 8840.135)(184.15828, 1523.9177)(185.83472, 578.955)(164.06906, 7674.6123)(165.56772, 2728.465)(167.07373, 5433.8325)(168.0747, 4739.8)(190.0393, 302.065)(171.02791, 4182.136)
CPD-10797	3-hydroxycinnamate	1	8312504	6638233	1	1	1	3681598	3662626	3764481	1	1	1	3924674	3721662	4377764	1	1	1	1	1	1	1	1	3115435	(163.03813, 81623.016)(164.04182, 7562.882)(148.03775, 637.67)(166.05345, 451.98398)(147.5399, 541.54504)(148.0381, 499.86)(182.08026, 4525.2437)(184.20686, 1922.1088)(186.08484, 596.59406)(164.06949, 4351.042)(165.28989, 1307.7067)(167.07147, 3423.4968)(190.0393, 302.065)
COUMARATE	4-coumarate	1	8312504	6638233	1	1	1	3681598	3662626	3764481	1	1	1	3924674	3721662	4377764	1	1	1	1	1	1	1	1	3115435	(163.03813, 81623.016)(164.04182, 7562.882)(148.03775, 637.67)(166.05345, 451.98398)(147.5399, 541.54504)(148.0381, 499.86)(182.08026, 4525.2437)(184.20686, 1922.1088)(186.08484, 596.59406)(164.06949, 4351.042)(165.28989, 1307.7067)(167.07147, 3423.4968)(190.0393, 302.065)
2-COUMARATE	<i>trans</i>-2-coumarate	1	8312504	6638233	1	1	1	3681598	3662626	3764481	1	1	1	3924674	3721662	4377764	1	1	1	1	1	1	1	1	3115435	(163.03813, 81623.016)(164.04182, 7562.882)(148.03775, 637.67)(166.05345, 451.98398)(147.5399, 541.54504)(148.0381, 499.86)(182.08026, 4525.2437)(184.20686, 1922.1088)(186.08484, 596.59406)(164.06949, 4351.042)(165.28989, 1307.7067)(167.07147, 3423.4968)(190.0393, 302.065)
PHENYL-PYRUVATE	3-phenyl-2-oxopropanoate	1	8312504	6638233	1	1	1	3681598	3662626	3764481	1	1	1	3924674	3721662	4377764	1	1	1	1	1	1	1	1	3115435	(163.03813, 81623.016)(164.04182, 7562.882)(148.03775, 637.67)(166.05345, 451.98398)(147.5399, 541.54504)(148.0381, 499.86)(182.08026, 4525.2437)(184.20686, 1922.1088)(186.08484, 596.59406)(164.06949, 4351.042)(165.28989, 1307.7067)(167.07147, 3423.4968)(190.0393, 302.065)
ENOL-PHENYLPYRUVATE	enol-phenylpyruvate	1	8312504	6638233	1	1	1	3681598	3662626	3764481	1	1	1	3924674	3721662	4377764	1	1	1	1	1	1	1	1	3115435	(163.03813, 81623.016)(164.04182, 7562.882)(148.03775, 637.67)(166.05345, 451.98398)(147.5399, 541.54504)(148.0381, 499.86)(182.08026, 4525.2437)(184.20686, 1922.1088)(186.08484, 596.59406)(164.06949, 4351.042)(165.28989, 1307.7067)(167.07147, 3423.4968)(190.0393, 302.065)
CPD-12111	4-hydroxycoumarin	1	11202986	4080907	4747260	8491357	6225653	13208815	11182888	11033795	591733	569852	576674	9029751	3443367	3287755	4758988	5076237	4804183	9229076	9689590	9600206	5879020	4729760	1343583	(163.0382, 52598.96)(167.0457, 103.4)(148.03532, 181.63)(163.79099, 64331.28)(164.795, 5762.8364)(165.05298, 124.02)(148.03784, 1292.1238)(180.06532, 100828.02)(181.0675, 13237.96)(162.66508, 3405.639)(166.06815, 3403.865)(170.35506, 1291.77)(171.02515, 3019.69)
CPD-8186	umbelliferone	1	1	4080907	1	1	1	1	1	1	1	1	1	1	3443367	3287755	1	1	1	1	1	1	1	1	1343583	(163.03821, 82585.19)(164.04198, 7754.165)(165.0554, 132.17)(148.03798, 1120.5026)(180.06711, 2134.57)(162.80872, 1436.2725)(167.071, 3358.05)
TRYPTAMINE	tryptamine	868983	927923	886016	1143159	1409088	1255562	871797	861250	845451	945629	909382	967335	565136	483453	1	377047	343034	316127	1083939	1036367	1104021	524723	523964	1	(163.11064, 22807.2)(165.1206, 156.41)(165.12607, 5531.468)(179.14156, 12825.763)(180.14433, 808.85846)(184.68752, 13887.972)(187.10596, 2549.942)(187.1079, 4065.04)
CPD-8684	(3Z)-3-nonenal	2852120	2267523	745407	3076564	764317	932959	2737297	2690535	2517359	2504493	1954345	2635541	2478873	422675	1704953	2336380	1301805	2607616	875033	2739640	3965770	2473196	2427801	2471826	(163.11067, 21894.19)(164.11137, 2440.8096)(165.12566, 255.785)(123.1161, 4878.089)(142.12178, 17988.4)(158.15292, 16210.838)(159.1563, 302.56122)(145.10031, 13020.995)(146.09895, 328.6714)
CPD0-1661	&alpha;-monofluoromethylagmatine	1331093	1184942	1265833	1131179	1886640	1167375	767678	690385	217945	945331	1	994017	701036	748596	719133	1540696	1504632	1482254	197390	221622	1202023	1278123	371149	1333182	(163.12976, 17155.246)(164.38602, 3100.61)(163.13115, 48439.277)(164.13521, 3712.9236)(165.1278, 233.26001)(187.55577, 15007.5625)(189.45763, 2414.5427)
NICOTINE	(<i>S</i>)-nicotine	513259	1	349211	289796	251237	326254	249791	262798	596543	498126	505490	542727	1130118	1152077	1207748	296040	365958	416553	166984	354541	214175	666758	1186876	633051	(163.6783, 5762.5547)(164.12189, 107.705)(164.9491, 2133.1145)(165.12737, 946.2033)(184.56631, 720.7269)(185.1634, 126.50999)(187.0291, 5650.9595)(188.44928, 2310.1875)(189.92189, 4521.914)(190.1252, 330.04)
CPD-12607	L-seryl-glycine	1014498	935103	725606	1	751547	1	3803213	12017328	968161	1267681	1144379	1507641	4567051	4342369	4319820	564037	1	675806	1126995	893455	910005	2379630	3355678	8583846	(163.84564, 8687.428)(165.65363, 1889.9791)(167.07277, 1506.9471)(146.05785, 16766.842)(147.29211, 1417.5652)(148.89447, 471.29333)(163.96332, 21144.664)(167.08221, 12282.758)(146.5022, 13435.224)(148.69325, 7284.286)(148.0646, 159.82)(150.0695, 206.53)(180.10008, 66942.71)(181.09904, 6443.0044)(182.09613, 421.34253)(162.23186, 13453.877)(163.09, 1115.9641)(186.94345, 4376.2144)(189.06703, 4953.6…
X-PYROPHOSPHATE-GROUP	x-pyrophosphate-group	190134	165990	163413	169280	197074	111785	213857	237072	240605	187613	185731	175070	1	129710	145883	162897	129070	121215	1	143759	1	116942	125297	108754	(163.97693, 1101.3458)(165.9827, 678.352)(143.95903, 1869.1302)
CPD-12392	1-(methylsulfanyl)-5-<i>aci</i>-nitropentane	1	1	1	1	1	1	1	1	1	1	1	1	18807812	1	20246164	1	1	1	1	9043644	9415396	1	12837858	16852364	(164.06773, 24022.281)(166.31662, 18071.207)(168.06483, 48895.26)(146.05612, 15100.777)(147.30362, 1000.07245)(148.0579, 277.71335)(150.05501, 977.42334)(166.07245, 2883.69)(147.06386, 727.93335)(148.55875, 8787.605)(150.06, 10996.569)(151.0609, 3573.2)(181.0995, 64067.105)(182.1149, 5621.88)(164.08546, 515817.53)(167.0884, 153648.44)(187.06073, 1945.9924)(188.55315, 76.125)(189.056, 345.53)(169.…
HOMOMETHIONINE	L-homomethionine	1	1	1	1	1	1	1	1	1	1	1	1	18807812	1	20246164	1	1	1	1	9043644	9415396	1	12837858	16852364	(164.06773, 24022.281)(166.31662, 18071.207)(168.06483, 48895.26)(146.05612, 15100.777)(147.30362, 1000.07245)(148.0579, 277.71335)(150.05501, 977.42334)(166.07245, 2883.69)(147.06386, 727.93335)(148.55875, 8787.605)(150.06, 10996.569)(151.0609, 3573.2)(181.0995, 64067.105)(182.1149, 5621.88)(164.08546, 515817.53)(167.0884, 153648.44)(187.06073, 1945.9924)(188.55315, 76.125)(189.056, 345.53)(169.…
ETHIONINE	L-ethionine	1016746	1288535	1	642430	1	1098324	1	1624131	1719525	1730938	1498910	2039111	18807812	1485944	20246164	891190	1232232	867617	1252975	9043644	9415396	2103749	12837858	16852364	(164.06877, 23118.822)(166.69127, 12238.466)(167.86588, 32416.568)(168.0646, 7232.57)(146.05788, 15101.54)(148.0541, 2592.3398)(148.45686, 1528.15)(150.0549, 2514.3225)(165.21391, 11498.565)(165.0711, 7389.67)(146.59937, 9112.452)(147.72859, 3157.7683)(150.06, 10996.569)(151.0609, 3573.2)(181.53806, 33321.043)(182.10745, 2437.897)(183.09892, 295.81332)(164.51617, 247793.9)(166.712, 68699.03)(167.…
RHAMNOSE	&alpha;-L-rhamnopyranose	3214059	1	1	1	1	1	1	2000814	1	3435750	868964	1	3065111	1469764	4600749	1	1	1	1	1	1	2348497	2286254	2937242	(164.0691, 38848.207)(165.06827, 9043.366)(146.0591, 35608.445)(147.05917, 2749.172)(148.05403, 248.70833)(167.58128, 2809.6501)(149.23718, 1842.9183)(150.57562, 3184.6675)(151.078, 1978.97)(183.00577, 1232.107)(185.90865, 824.692)(186.1091, 184.94)(165.76453, 3664.4392)(168.09843, 3368.86)(188.56178, 5210.0938)(170.0509, 1586.792)
CPD-10329	&alpha;-L-fucopyranose	3214059	1	1	1	1	1	1	2000814	1	3435750	868964	1	3065111	1469764	4600749	1	1	1	1	1	1	2348497	2286254	2937242	(164.0691, 38848.207)(165.06827, 9043.366)(146.0591, 35608.445)(147.05917, 2749.172)(148.05403, 248.70833)(167.58128, 2809.6501)(149.23718, 1842.9183)(150.57562, 3184.6675)(151.078, 1978.97)(183.00577, 1232.107)(185.90865, 824.692)(186.1091, 184.94)(165.76453, 3664.4392)(168.09843, 3368.86)(188.56178, 5210.0938)(170.0509, 1586.792)
CPD-15619	<i>aldehydo</i>-L-fucose	3214059	1	1	1	1	1	1	2000814	1	3435750	868964	1	3065111	1469764	4600749	1	1	1	1	1	1	2348497	2286254	2937242	(164.0691, 38848.207)(165.06827, 9043.366)(146.0591, 35608.445)(147.05917, 2749.172)(148.05403, 248.70833)(167.58128, 2809.6501)(149.23718, 1842.9183)(150.57562, 3184.6675)(151.078, 1978.97)(183.00577, 1232.107)(185.90865, 824.692)(186.1091, 184.94)(165.76453, 3664.4392)(168.09843, 3368.86)(188.56178, 5210.0938)(170.0509, 1586.792)
CPD-5861	2-deoxy-D-galactose	3214059	1	1	1	1	1	1	2000814	1	3435750	868964	1	3065111	1469764	4600749	1	1	1	1	1	1	2348497	2286254	2937242	(164.0691, 38848.207)(165.06827, 9043.366)(146.0591, 35608.445)(147.05917, 2749.172)(148.05403, 248.70833)(167.58128, 2809.6501)(149.23718, 1842.9183)(150.57562, 3184.6675)(151.078, 1978.97)(183.00577, 1232.107)(185.90865, 824.692)(186.1091, 184.94)(165.76453, 3664.4392)(168.09843, 3368.86)(188.56178, 5210.0938)(170.0509, 1586.792)
CPD0-1112	&beta;-L-rhamnopyranose	3214059	1171522	1950105	1	1126415	922138	1	2000814	1638209	3435750	868964	1223839	3065111	1469764	4600749	1	1	1354386	834706	856708	966790	2348497	2286254	2937242	(164.06917, 22201.408)(165.06827, 9043.366)(146.05914, 23434.004)(147.05943, 2783.829)(148.05403, 248.70833)(167.31561, 4562.3857)(148.53716, 4193.914)(149.77138, 2011.281)(151.078, 1978.97)(183.27357, 1692.7123)(186.10915, 711.925)(186.1091, 184.94)(164.92842, 15987.536)(166.38152, 2741.2844)(189.16792, 9212.004)(170.76736, 1877.6973)
15-DIDEOXY-15-IMINO-D-GALACTITOL	1,5-dideoxy-1,5-imino-D-galactitol	1544020	1267764	1156266	916804	2592641	1317101	616386	1584831	1544837	1	992097	1906729	3291893	3208232	2237495	1434614	1416302	1269607	1492503	1309105	1482350	3264825	3116595	2960507	(164.14827, 28829.674)(165.09265, 2837.998)(146.08037, 1375.1678)(165.10022, 5457.4585)(147.37643, 9135.317)(148.0913, 231.74)(184.22292, 61682.434)(183.12595, 11827.084)(164.91562, 9068.947)(167.11826, 3959.39)(188.39046, 6320.9526)(189.54915, 2884.0066)(190.37187, 2195.3843)(192.0886, 359.64)(170.39034, 8823.156)(172.07631, 787.4513)(172.07385, 4204.315)(174.0841, 2072.195)
L-ERYTHRO-4-HYDROXY-GLUTAMATE	erythro-4-hydroxy-L-glutamate	179499	195378	297032	443415	244705	839374	402386	572185	510033	480965	628744	518474	535609	1745604	179631	252013	1272920	215214	325776	265194	222321	462022	473961	610400	(164.30632, 36398.766)(165.04602, 4047.9539)(148.03725, 2025.8425)(165.05508, 11898.074)(166.0507, 24194.61)(146.88414, 9180.475)(147.92053, 767.09)(181.62111, 72325.15)(182.70541, 18876.787)(184.25208, 2500.4734)(163.90236, 7123.9824)(166.4983, 7575.2085)(189.5411, 2165.76)(190.0405, 168.21)(170.7589, 5610.5815)(172.03024, 173.31)
CPD-13353	(2S,3E)-2-amino-4-(2-aminoethoxy)but-3-enoate	837151	504554	456247	826490	2064245	468660	960446	814581	742267	1	470569	522314	507647	1703265	1822022	2151325	1	1	948860	676235	842110	3278339	3517950	3675789	(164.33612, 13391.393)(144.61142, 2641.4995)(146.18578, 2572.418)(163.79225, 3366.4863)(146.42578, 27703.64)(147.09367, 954.72003)(181.03568, 13180.15)(182.41977, 1722.7665)(162.96259, 2816.6406)(186.75455, 6248.273)(188.08948, 7275.521)(188.75934, 4443.42)(189.0909, 162.28)(168.07683, 27675.477)(169.76846, 4559.2354)(170.75084, 3695.74)
CPD-13719	dimethylselenopropanoate-amine	617350	354268	1	1	1	291928	266815	1034207	1084784	1464328	1428953	1239642	449872	533159	686546	155160	1	544456	1	667680	1	596783	354501	296084	(164.5387, 2712.4026)(164.0418, 627.96)(166.77373, 12996.06)(167.47684, 21348.896)(169.17726, 1819.5775)(174.05435, 2212.8374)(176.0599, 138.78)(183.57817, 81399.664)(185.27574, 6838.2085)(188.46007, 9499.123)(190.32576, 14805.407)(191.62085, 14938.4375)(192.20433, 27932.225)(193.7481, 34437.723)(194.0807, 42530.39)(196.53659, 3921.0999)(197.16394, 997.4325)(198.0433, 14403.005)
CPD-8636	4-hydroxybenzalacetone	5524365	4599195	3955202	2935676	1038670	1212315	9691993	8913917	9531512	7626169	7036570	7589664	3218734	3027999	4535555	1	1835661	1	1295968	1299375	5497684	1984462	2149399	2154206	(164.64441, 5264.663)(166.58315, 5838.7197)(167.0823, 3483.2)(146.23724, 6104.063)(147.9588, 4638.248)(148.9263, 3240.764)(149.0675, 2592.74)(165.98459, 149218.5)(166.96628, 18785.16)(167.58554, 8138.835)(147.57187, 6867.879)(150.0773, 4470.57)(180.10085, 133880.1)(181.10362, 23027.113)(182.1072, 1445.37)(162.09026, 59070.3)(163.09369, 7441.855)(164.10686, 583.264)(187.20018, 12988.259)(188.499, …
CPD-397	S-methyl-L-methionine	1787776	2182813	3046229	1091762	3015710	1	3269185	2045612	1221822	1402165	1279049	1971720	4126239	4339470	3050077	1339886	1218471	1429865	1561652	2132281	2220318	4517122	4110193	4633622	(164.7973, 26038.076)(165.06924, 7570.4424)(146.3934, 19102.998)(147.06161, 2543.9348)(148.0561, 109.49334)(166.08543, 195784.0)(167.85825, 2076.0244)(148.07336, 13976.759)(149.24411, 5365.487)(151.31909, 17559.852)(182.63092, 1843.6781)(184.60562, 565.942)(185.94316, 1192.4216)(186.35892, 920.895)(165.64862, 3412.7625)(169.09836, 944.534)(187.4983, 11623.826)(192.06567, 9446.815)(169.6461, 19639…
CPD-12218	3-hydroxy-3-phenylpropanoate	678799	676494	1	775827	1	715434	810922	810674	761853	516954	1	498303	1076756	1	1	1	1	1288203	1039450	1125043	1156904	1427134	1395361	1404028	(165.05638, 3034.4976)(147.04178, 8070.6167)(148.04358, 547.2767)(167.94308, 3312.372)(169.5745, 8508.256)(170.0763, 2928.06)(150.0559, 3036.8638)(152.06538, 9783.905)(183.08926, 9951.574)(184.09418, 1175.9406)(165.90778, 12562.674)(167.0856, 1352.6)(191.88551, 2430.82)(175.0514, 204.23)
MELILOTATE	melilotate	678799	676494	2822794	775827	1	715434	810922	810674	761853	516954	1	498303	1076756	768552	1	5192302	4331493	1288203	1039450	1125043	1156904	1427134	1395361	1404028	(165.20645, 8978.83)(167.05476, 2350.2366)(147.18544, 8591.976)(148.47433, 621.99426)(152.0569, 182818.4)(167.9624, 5669.7964)(169.5745, 8508.256)(170.0763, 2928.06)(149.81819, 4844.032)(151.3955, 10135.373)(151.06062, 4056.7703)(183.13713, 9908.639)(184.15, 1116.9583)(187.1016, 110.59)(165.94162, 251258.1)(167.087, 51683.824)(191.88551, 2430.82)(175.0514, 204.23)
CPD0-1718	7,8-dihydropterin	825030	654708	529199	1293795	1	420015	992804	1	655361	1447957	755779	839147	1881754	1769699	2055313	721469	583363	616517	750244	2198164	2266787	1373147	1	528964	(165.26524, 3170.7769)(147.6819, 2355.7544)(149.6031, 7331.072)(150.4861, 5168.179)(151.26128, 3931.148)(167.7815, 19460.92)(169.91566, 2002.6798)(149.4913, 2427.4075)(152.0675, 1261.12)(184.47522, 6854.5273)(187.10745, 376.97498)(167.19089, 346973.44)(167.27399, 25035.355)(168.9278, 9414.988)(169.0954, 9828.58)(191.87727, 21001.086)(192.97614, 2158.8027)(171.44933, 2221.8994)
CPD-18120	caffealdehyde	11932469	11140341	11073408	11750476	14285753	11751630	1	12697865	12879558	9224987	1	8051885	9850458	8532269	8477510	15315767	13193362	1	1	7368549	7688834	7098345	5979548	13820748	(165.46416, 27253.324)(166.30077, 14402.574)(167.41792, 715.7354)(169.06041, 373.55334)(148.04245, 7602.405)(165.05603, 13758.631)(166.05115, 1473.265)(147.30817, 41219.914)(182.0821, 199952.17)(183.08366, 19725.637)(184.08194, 498.85498)(164.219, 9513.983)(189.03807, 2091.4236)(190.044, 344.265)(173.03369, 1122.17)
CPD-14474	(3<i>R</i>)-&beta;-phenylalanine	100716360	87486264	16911648	130649088	17270406	4656257	19463068	69554856	13897006	19382880	11252633	16111215	10515075	36713128	37475800	187487632	159124992	162556528	90790936	16342821	14928043	1298172	1381036	1347413	(165.58331, 11635.452)(168.08969, 279.945)(147.99384, 8477.259)(150.67775, 1357.1279)(166.08543, 1565397.2)(167.08728, 155251.67)(168.09035, 21982.086)(148.47464, 11134.329)(149.0723, 842.1275)(183.11006, 3779.85)(184.10834, 331.965)(165.62317, 6031.42)(188.06966, 88226.164)(189.07295, 27140.719)(190.07706, 1123.645)(171.13452, 31099.97)(171.06366, 4652.1646)(172.0745, 264.96)
RICININE	ricinine	2813445	1	1	2820938	2498277	1908969	4555878	3973241	4086309	5618203	5654018	5711222	1	1	305820	1	1	3760176	1	1	527160	1	297105	552453	(165.595, 5734.154)(168.56975, 4462.765)(169.0734, 4271.13)(148.21895, 8740.293)(150.42169, 8328.376)(150.80957, 4939.3174)(151.061, 6156.77)(166.46977, 7147.5986)(148.05807, 1052.348)(149.43561, 19789.822)(151.0612, 6660.93)(183.22722, 9614.688)(184.31044, 9250.458)(186.83066, 757.57904)(166.0184, 1437593.4)(167.15518, 136866.72)(168.09213, 19244.96)(169.09526, 10137.921)(191.46144, 26542.438)(1…
3-METHYLTHIOPROPYLHYDROXAMIC-ACID	(<i>E</i>)-&omega;-(methylsulfanyl)butyl-thiohydroximate	33001576	26744800	26052092	27411104	23575950	24886556	24095848	25603956	25768820	25768582	24666284	25744380	25220146	24751844	25249084	32466484	26645728	25730048	25551908	25199600	25775384	25323600	25757768	24926224	(165.89136, 301.89996)(152.01608, 195.65068)(153.0098, 106.15)(166.03477, 421.19055)(148.02496, 16148.879)(167.84142, 39700.74)(169.87463, 8623.441)(170.0485, 5754.5654)(191.01482, 4131.8784)(171.92201, 7100.4927)(172.3388, 4966.88)
CPDQT-331	raphanusamate	642558	520332	513970	592697	467430	517570	432964	426696	449047	511584	517535	495907	549381	578474	570444	549980	418936	525558	630299	603569	642807	510791	473418	479551	(165.96558, 5043.8755)(167.9614, 595.5075)(144.48015, 1830.6039)(163.43715, 1217.8761)(163.9769, 1106.4875)(185.00163, 1697.18)(165.98271, 550.99445)(184.95988, 30041.455)(186.43822, 3361.5217)(186.95888, 2063.6846)
PHOSPHO-ENOL-PYRUVATE	phospho<i>enol</i>pyruvate	233357	186932	185164	1	195877	95694	108565	142317	144442	144492	127545	127744	1725595	1545362	1719142	108250	92146	1540166	79223	90083	84149	1666408	1802941	1690928	(165.9656, 8998.653)(167.66118, 2243.6401)(149.95155, 1296.0109)(186.43039, 5344.75)(186.9968, 5642.94)(168.09297, 2359.5144)
7-METHYLXANTHINE	7-methylxanthine	2370777	2077012	2025011	1653231	1506469	1775497	2459339	814892	2236919	2564089	2279305	2440116	6398332	770047	1010042	2028846	1520778	1504212	281451	220367	2346140	495824	7703469	1039555	(166.05035, 24020.984)(167.0494, 1770.3588)(148.03575, 1394.078)(169.46158, 3381.6296)(172.0718, 499.84)(152.1916, 1231314.2)(153.21399, 92710.94)(154.05573, 7639.7554)(186.58778, 6417.601)(187.89038, 4588.4263)(188.5925, 5651.245)(189.0899, 199.35)(167.61635, 21916.49)(168.74532, 7902.125)(189.28848, 2282.49)(190.0483, 340.21)(171.29958, 8305.851)
3-METHYLXANTHINE	3-methylxanthine	1	1	1	1	1	1	1	814892	1	1	1	1	1	770047	1010042	1	1	1	281451	220367	1	495824	1	1039555	(166.05074, 13140.6875)(167.04439, 1047.9434)(148.03575, 1394.078)(169.56134, 4194.532)(172.0718, 499.84)(152.25264, 6898.486)(153.80534, 2589.2048)(186.94327, 5618.4243)(188.08861, 4123.87)(167.93347, 9089.119)(169.57967, 9158.305)(190.0438, 1600.93)(172.03143, 3283.665)
CPD-9025	1-methylxanthine	1	1	1	1	1	1	1	814892	1	1	1	1	1	770047	1010042	1	1	1	281451	220367	1	495824	1	1039555	(166.05074, 13140.6875)(167.04439, 1047.9434)(148.03575, 1394.078)(169.56134, 4194.532)(172.0718, 499.84)(152.25264, 6898.486)(153.80534, 2589.2048)(186.94327, 5618.4243)(188.08861, 4123.87)(167.93347, 9089.119)(169.57967, 9158.305)(190.0438, 1600.93)(172.03143, 3283.665)
CPD-14529	phenylethyl acetate	1	1	1	1	1	1	1	1	1	1	1	863614	1	1	1	1	1	1	1	1	1	2980259	2528165	2975923	(166.08493, 43136.734)(150.085, 31677.963)(151.08514, 5957.65)(167.0979, 3161.5764)(150.0924, 7545.1)(182.11641, 16617.383)(183.1167, 1792.83)(164.1046, 23306.055)(188.32535, 11429.775)(190.41765, 22906.662)(191.08084, 35277.188)(169.56207, 1539.3901)(172.0723, 3416.85)
CPD-19959	propyl benzoate	1	1	1	1	1	1	1	1	1	1	1	863614	1	1	1	1	1	1	1	1	1	2980259	2528165	2975923	(166.08493, 43136.734)(150.085, 31677.963)(151.08514, 5957.65)(167.0979, 3161.5764)(150.0924, 7545.1)(182.11641, 16617.383)(183.1167, 1792.83)(164.1046, 23306.055)(188.32535, 11429.775)(190.41765, 22906.662)(191.08084, 35277.188)(169.56207, 1539.3901)(172.0723, 3416.85)
ISOEUGENOL	isoeugenol	1	1	1	1	1	1	1	1	1	1	1	863614	1	1	1	1	1	1	1	1	1	2980259	2528165	2975923	(166.08493, 43136.734)(150.085, 31677.963)(151.08514, 5957.65)(167.0979, 3161.5764)(150.0924, 7545.1)(182.11641, 16617.383)(183.1167, 1792.83)(164.1046, 23306.055)(188.32535, 11429.775)(190.41765, 22906.662)(191.08084, 35277.188)(169.56207, 1539.3901)(172.0723, 3416.85)
CPD-6481	eugenol	1	1	1	1	1	1	1	1	1	1	1	863614	1	1	1	1	1	1	1	1	1	2980259	2528165	2975923	(166.08493, 43136.734)(150.085, 31677.963)(151.08514, 5957.65)(167.0979, 3161.5764)(150.0924, 7545.1)(182.11641, 16617.383)(183.1167, 1792.83)(164.1046, 23306.055)(188.32535, 11429.775)(190.41765, 22906.662)(191.08084, 35277.188)(169.56207, 1539.3901)(172.0723, 3416.85)
CPD-8647	4-hydroxyphenylbutan-2-one	1	1	1	1	1	1	1	1	1	1	1	863614	1	1	1	1	1	1	1	1	1	2980259	2528165	2975923	(166.08493, 43136.734)(150.085, 31677.963)(151.08514, 5957.65)(167.0979, 3161.5764)(150.0924, 7545.1)(182.11641, 16617.383)(183.1167, 1792.83)(164.1046, 23306.055)(188.32535, 11429.775)(190.41765, 22906.662)(191.08084, 35277.188)(169.56207, 1539.3901)(172.0723, 3416.85)
#NAME?	#NAME?	1	1	1	1	1	1	1	1	1	1	648401	1	1041877	2824907	3586970	1	1	1	1	1	1	3122252	3416581	2017044	(166.12134, 51382.75)(167.12204, 6161.979)(165.13614, 5901.84)(190.2553, 2448.8557)(172.9604, 783.30286)(173.90944, 1691.498)
CPD-9947	pseudoisoeugenol	1171214	1094560	1131059	1454266	1002552	968784	1307868	1321726	1328112	1430278	2024257	863614	926136	848404	2047110	1000174	963368	963915	1268552	1247288	1242325	2980259	2528165	2975923	(166.42198, 16708.182)(168.0027, 7532.5327)(168.095, 1415.565)(148.41458, 16166.931)(151.08514, 5957.65)(167.0979, 3161.5764)(148.886, 4388.5693)(149.5869, 450.995)(182.1999, 26592.234)(183.21667, 2322.758)(164.10672, 14840.44)(165.11064, 556.6434)(187.46434, 8805.581)(188.89653, 7010.73)(189.74152, 12142.903)(169.5368, 2337.7427)(172.0723, 3416.85)
S-2-AMINOETHYL-L-CYSTEINE	<i>S</i>-(2-aminoethyl)-L-cysteine	100900968	83789528	4315114	1	2178827	994419	3203609	6245240	2636130	11088485	63323880	10999303	2393927	1107447	2116238	12879189	1445238	4703465	4043352	4017996	2501467	3289643	923858	3474603	(166.86684, 14049.014)(166.8199, 2613.0425)(167.06633, 375.1133)(148.44919, 51564.14)(150.16939, 25321.709)(151.43204, 341371.9)(151.39258, 144402.8)(152.0562, 1051740.2)(168.2209, 39358.016)(168.41298, 12208.333)(171.07791, 250.9)(149.56921, 8292.871)(152.8662, 6004.37)(185.03847, 2502.1208)(187.1045, 2288.28)(167.08894, 139983.94)(168.91252, 9525.484)(190.0601, 4680.6206)(193.06042, 657.22)(170…
CPD-9280	ethiin	2501651	421685	1998675	2127734	1535933	2059121	2073261	2012038	1	1977394	1850431	1945235	1767374	1870449	1516210	2475324	1937097	1794479	1929333	1878835	1880411	2484376	2354921	2980422	(166.86795, 34922.625)(169.19035, 5342.2827)(169.04941, 2120.2148)(170.04779, 687.39)(150.44397, 3419.297)(151.86781, 2257.639)(152.03526, 1150.5033)(167.59036, 28383.246)(168.71675, 19255.564)(169.71574, 6068.7583)(170.86885, 1460.3301)(171.0512, 643.34)(186.03506, 7040.898)(187.27818, 1497.7573)(165.15567, 19091.773)(166.22438, 1228.8368)(167.0641, 139.605)(189.67932, 1053.2542)(191.031, 134.51…
CPD-380	3-sulfopyruvate	94210	60299	1	60408	76919	78020	110923	87291	91921	81797	1	72978	1	1	1	75089	93405	1	1	99934	1	1	1	1	(166.95663, 8578.574)(168.67131, 498.7271)(168.9562, 475.61)(151.57307, 1236.9637)(151.9484, 763.67)(167.96315, 814.125)(186.99355, 2681.0056)(187.993, 1295.5994)(167.31636, 839.41)(190.94308, 1649.587)
CPD0-1386	3-(sulfanylcarbamoyl)-L-alanine	31474034	25536090	24870830	26077928	22432238	23673920	22726730	24353468	24571640	24610820	23513946	24548442	24042246	23600542	24036066	31000656	25373272	24540492	24318032	23979556	17950750	24103810	24263908	23719732	(167.0272, 189.12)(165.90419, 365.84128)(147.0225, 297348.34)(148.02496, 16156.539)(187.0637, 24361.56)(167.84142, 39565.793)(168.96696, 14476.54)(169.0502, 12560.745)(188.18153, 1284.858)(191.015, 4172.28)(172.0049, 7724.916)(173.0065, 64.29)
CPD-12225	&beta;-fenchocamphorone	6113825	5762904	5675394	4371532	9761908	7801896	6664570	6397682	6478161	2351741	5991125	2450815	791901	3102930	3180905	1798115	1817697	6290735	6412724	6350128	1231836	1754604	1604110	1542083	(167.14203, 42530.195)(168.1453, 4043.0708)(149.13055, 528.37)(149.1317, 147205.5)(150.13492, 17143.914)(189.12329, 16570.572)(190.12807, 5033.72)(191.13531, 299.41998)(171.75061, 6273.115)
2-3-DIHYDRODIPICOLINATE	(<i>S</i>)-2,3-dihydrodipicolinate	8279002	5140254	6337903	304679	811545	4815079	1743845	261947	4002386	8633896	7593603	7521359	78668	1669857	4426414	9312608	5217779	1605147	354252	1643801	3191994	185891	256789	111014	(167.7256, 1983.6213)(152.01622, 1328.1034)(173.0426, 360.15)(155.03352, 6905.803)(186.91985, 43379.91)(189.06914, 25001.611)(167.92415, 179235.0)(169.00507, 40151.91)(170.04831, 32358.527)(171.05075, 9229.676)(172.05801, 4382.314)(191.01602, 3207.2144)(192.01651, 509.50098)(172.44934, 3092.899)
PYRIDOXAL	pyridoxal	11622375	9497567	11224466	13042428	15269295	761575	10017462	8258387	8534588	8798428	2155860	8617289	1737943	4856449	2426271	19037416	16313397	16190549	10698811	9966198	9566350	1	4578240	1756859	(167.8755, 11066.027)(169.81538, 1380.6)(171.87082, 1380.9401)(172.0745, 5077.34)(152.05576, 580767.06)(152.99956, 57917.23)(154.0023, 7076.9893)(168.06525, 15501.372)(169.06314, 1101.4401)(150.09949, 7564.1577)(151.30092, 137592.98)(186.39871, 1806.7656)(189.5306, 8770.151)(168.92728, 3554.5017)(171.23264, 803.18134)(171.76137, 497.0167)(172.0958, 151.85)(190.65193, 1964.7561)(173.0408, 97.85)
1-AMINO-PROPAN-2-ONE-3-PHOSPHATE	3-amino-1-hydroxyacetone 1-phosphate	178623	152588	166846	240780	391284	257705	416966	325260	299820	211649	1	213828	243320	248828	267990	200075	148464	116235	159324	170425	162333	231791	208321	247521	(168.00548, 2790.0256)(170.56488, 4761.38)(171.017, 1047.22)(189.05176, 268.46667)(169.03416, 778.09393)(192.99768, 2612.6199)(193.9972, 366.38)(172.9833, 10486.765)
CPD-864	(+)-bornane-2,5-dione	586050	544102	511784	721048	905064	748375	487306	496191	519229	567392	979383	1015629	1023063	932301	1020313	710412	747267	701809	671611	691532	708459	3146031	2205793	2185669	(168.01027, 6144.5015)(170.90964, 6081.947)(171.1101, 7052.48)(150.38184, 9461.255)(170.11627, 2123.8374)(171.11664, 233.83499)(149.548, 18042.338)(150.09492, 1437.0918)(186.96877, 2117.3171)(166.12135, 45462.836)(167.12204, 5552.674)(191.19113, 4146.463)(192.1011, 11583.045)(174.30399, 26130.69)(174.88655, 30861.09)(175.0851, 10537.98)
CPD0-1267	isophthalate	1	1	1	1	1	1	1	1	1	1	1	1	663489	633689	639404	1	1	1	1	1	1	1157955	1014692	1069935	(168.01945, 251.16667)(187.05875, 1545.365)(186.99968, 28881.205)(188.66687, 2130.59)(188.9987, 2453.84)(173.00041, 2444.68)
TEREPHTHALATE	terephthalate	1	1	1	1	1	1	1	1	1	1	1	1	663489	633689	639404	1	1	1	1	1	1	1157955	1014692	1069935	(168.01945, 251.16667)(187.05875, 1545.365)(186.99968, 28881.205)(188.66687, 2130.59)(188.9987, 2453.84)(173.00041, 2444.68)
PHTHALATE	phthalate	1	1	1	1	1	1	1	1	1	1	1	1	663489	633689	639404	1	1	1	1	1	1	1157955	1014692	1069935	(168.01945, 251.16667)(187.05875, 1545.365)(186.99968, 28881.205)(188.66687, 2130.59)(188.9987, 2453.84)(173.00041, 2444.68)
CPD-7650	3-methoxytyramine	1122903	1129447	969698	995431	988787	1024477	1541429	1480710	1385974	1572029	1418533	1	2682164	2332804	2632927	459137	493740	696013	1107095	1199399	1159566	3700806	3488959	3335596	(168.10083, 26008.73)(169.10301, 2008.4176)(150.09035, 36927.45)(151.09209, 2808.0928)(171.11273, 1428.2201)(152.1064, 749.64)(186.1323, 239.07)(191.9662, 6083.0464)(195.09775, 7510.8354)(175.977, 1418.0999)(177.08792, 2569.2002)
CPD0-1659	&alpha; -allenylagmatine	419132	416308	374326	98701	560300	496768	417188	395807	362795	136652	1	123284	367331	1	387513	553135	498997	449384	420954	443389	403695	511449	514387	489070	(168.1372, 21536.943)(169.14009, 844.91113)(194.82741, 110014.8)(196.13945, 65109.84)
CPD0-1557	L-dihydrophenylalanine	1244754	1051851	970627	1	860891	865689	1663823	1285989	1	1419356	1218111	1339276	2566296	2353930	2374019	1	16966632	17024344	991988	1226079	1035040	3017278	3244398	3052796	(168.15057, 28156.12)(169.10312, 2331.9202)(150.0867, 51229.14)(151.0877, 6586.725)(171.10974, 7099.635)(172.11536, 12977.596)(150.09035, 41682.363)(151.09169, 3119.893)(185.12744, 5625.8335)(170.12329, 4721.265)(190.27458, 6414.407)(191.58716, 4906.652)(176.03252, 1955.7314)(175.75305, 936.64996)
CPD-7146	6-isobutyl-4-hydroxy-2-pyrone	754554	631259	252806	12731243	14531069	12214375	8686144	7222124	7252168	6605035	6969735	6679917	3877753	507441	509393	19167356	16055404	1	704511	238994	281353	502305	331126	393289	(168.29665, 13361.757)(169.15428, 529.83496)(149.21869, 23844.547)(150.05632, 4032.205)(170.33134, 9059.673)(171.9881, 1590.8201)(173.09492, 3675.0151)(153.79314, 12548.311)(153.87692, 3827.354)(154.0802, 3438.56)(155.0828, 1126.64)(187.3116, 2829.6804)(187.77753, 2393.9934)(168.2538, 11078.508)(169.0953, 14033.372)(191.97858, 18193.123)(193.82095, 4383.4873)(195.07608, 2308.1155)(173.83476, 3153…
CPD0-1224	L-2-amino-4-oxo-5-chloropentanoate	233457	179933	173030	135387	701205	254445	241314	280418	217250	1	173894	198800	173685	184359	227126	233577	144450	374991	192787	172568	128938	313732	265165	298143	(168.40099, 1697.321)(170.73851, 24409.111)(171.69447, 20219.932)(172.02885, 2757.625)(169.026, 919.125)(150.27197, 3964.187)(152.01602, 951.45996)(183.94237, 4379.5137)(168.33444, 25805.285)(171.05064, 8288.028)(189.56454, 3504.291)(190.3349, 1615.9098)(174.78166, 1324.9255)
PYRIDOXAMINE	pyridoxamine	373850	449909	298780	360479	400815	192767	1923307	159526	137360	152171	387952	1780132	3672423	2345304	149175	505959	561231	676716	274787	252233	253226	4600006	1733667	1780258	(169.09698, 4241.2246)(154.34508, 3434.2288)(156.0986, 579.58)(172.40282, 4476.8745)(173.7132, 7206.0166)(153.40097, 7521.7607)(156.10202, 2019.39)(190.91412, 13162.719)(192.14131, 1666.3882)(171.25098, 6467.613)(173.1302, 226.01666)(193.29602, 26649.115)(195.84453, 29608.107)(196.37975, 10932.151)(174.07753, 6668.56)
CPD-9978	(6<i>E</i>)-8-oxogeranial	1	1	1	1	1	1	1	1	1	1	979383	1015629	1023063	932301	1020313	1	1	1	1	1	1	3146031	2205793	2185669	(169.10371, 2935.673)(171.1077, 423.07)(150.38184, 9461.255)(170.11627, 2123.8374)(171.11664, 233.83499)(151.3537, 10536.16)(185.6369, 820.745)(166.12135, 45462.836)(167.12204, 5552.674)(191.4742, 10222.211)(192.1011, 11583.045)(173.372, 1444.7513)(174.58545, 7948.715)(175.0851, 10537.98)
CPD-19602	phenylarsenious oxide	1190102	274442	769125	814886	1	703806	385831	194196	307919	527512	215749	118306	209496	750645	281277	1255454	848358	771178	731721	547395	728423	700634	801445	744168	(169.29326, 192.60999)(168.9555, 333.86)(151.94844, 301.2983)(172.97609, 65.91)(154.91168, 342.50772)(154.967, 402.2)(187.13762, 3840.3096)(188.06502, 268.1957)(169.98804, 14333.545)(170.99179, 1419.09)(190.94356, 8054.156)(191.9404, 177.632)(177.95638, 139.96333)
CPD-5721	thioguanine	181988	298922	1	1	1	1	259204	1	1	631614	221412	569290	117918	220115	162585	1	1	1	1	1	1	1	1	1	(169.3588, 656.95776)(171.02531, 2088.5232)(186.38618, 270.41666)(190.01117, 2193.7712)(193.00674, 605.62)
PYRIDOXINE	pyridoxine	3466106	2024362	3393739	2197274	1	1989946	4962662	6651954	1	4073883	5875014	3818801	15035193	11082824	14703902	471683	3584117	2208611	2790533	2173858	2538156	12908167	1387928	1396601	(169.52707, 30781.105)(171.19121, 7307.1504)(171.0843, 428.47247)(152.06535, 38123.688)(153.06688, 2250.299)(156.0745, 157.78)(170.07845, 17186.527)(171.08363, 2092.6802)(172.0849, 242.12)(153.53441, 53137.33)(153.07191, 5873.5)(189.04953, 5950.0317)(191.1158, 4912.07)(170.80647, 1064.7711)(173.10632, 140.24666)(192.2019, 20172.773)(193.43233, 3034.0596)(175.14764, 1233.7618)(175.0551, 78.1)
CPD-7618	geranate	613828	582101	543949	773470	960771	798507	503690	518500	628811	603557	536324	560547	306927	319162	339851	747017	841705	715953	692139	733431	742640	836593	862741	538097	(169.77733, 642.25)(149.09636, 17250.66)(150.09369, 1295.0104)(172.75073, 8536.688)(173.1306, 9038.99)(151.24046, 4811.8164)(186.54651, 1261.9705)(187.14629, 1704.8066)(191.70236, 2849.829)(193.27052, 2313.9324)(194.1095, 345.16998)(173.559, 1198.6534)(177.1012, 8513.67)
CPD-8766	2-mercaptobenzothiazole	170830	545052	586387	588581	1	1	1	1	1	1	1	1	1	1	1	780718	1	1	1	1	1	1	1	1	(169.98807, 18416.754)(170.99191, 2756.892)(189.41534, 3548.414)(189.97098, 8002.9844)
CPD-479	4-(methylsulfanyl)-2-oxobutanoate	6703327	5459229	5215449	5526916	5328916	5264323	263463	5206924	5130318	5246528	4760843	5300551	5143829	5028760	5174790	6786452	5655030	165866	5365110	2540481	5325221	205962	186700	2492809	(169.9976, 73.36)(130.00642, 42905.96)(131.0022, 201.2)(168.00414, 36338.63)(169.71576, 6123.365)(170.04846, 3502.7717)(149.02298, 3851.1113)(154.9888, 12237.675)(150.98915, 3738.3787)(152.03447, 990.11)
L-CYSTEATE	L-cysteate	1	1	1	1	1	1	295925	1	1	1	1	1	1	1	1	1	1	1	1	1	1	1	1	1	(170.021, 562.44)(171.0166, 1275.69)
CPD-9954	pseudoephedrine	2500837	2110979	2221353	1702435	1649874	1683823	675465	696128	683030	919695	648401	1	1041877	2824907	3586970	1257205	982832	963879	1787032	589853	1673391	3122252	3416581	2017044	(170.12598, 352.0533)(166.12134, 51382.75)(167.12204, 6161.979)(148.11105, 37717.793)(149.11386, 5414.7993)(188.16309, 7882.3735)(165.59247, 7304.365)(168.14519, 2100.97)(190.72113, 2881.9187)(190.82751, 3997.9255)(191.11691, 1686.77)(172.15724, 582.36835)(173.98315, 1415.8726)
CPD0-1308	glyphosate	1244387	1207412	1203565	398204	609808	483923	346024	1163408	1	1562395	1	1379930	188557	428618	354141	923643	637995	419654	749281	857409	377602	1695573	1605493	297141	(170.1476, 2505.8416)(172.00476, 7178.746)(149.99203, 361.77252)(169.57228, 1134.2375)(151.9998, 185.85501)(186.03796, 8064.815)(168.1969, 5554.38)(172.0291, 1163.71)(192.39438, 1237.6515)(193.99655, 1347.712)(172.98277, 4477.563)
CPD-5441	N-dimethylethanolamine phosphate	402281	394293	417855	557462	564613	294331	581448	509588	558106	592395	688914	588338	662588	716520	1	574913	3882697	518628	400473	965061	658501	783670	687688	763530	(170.90677, 6190.6265)(172.55487, 3986.29)(152.20074, 11821.603)(152.7874, 2687.6426)(154.03806, 3698.845)(154.0362, 2714.62)(155.0405, 6641.01)(170.55545, 23708.885)(154.24973, 5162.95)(186.11931, 10218.667)(187.27696, 3120.272)(188.06876, 734.68506)(168.28296, 35379.523)(169.06604, 2077.0906)(191.0284, 403.88)(173.0199, 858.31)
CPD-7857	(6<i>E</i>)-8-hydroxygeraniol	4563681	3814918	153032	4503964	672756	691522	486330	541543	179007	419448	420336	410302	3018545	727672	544837	562010	283276	1990423	180001	176897	660646	586762	554805	1474241	(170.96814, 2676.3352)(175.14699, 12226.004)(153.52713, 2638.863)(174.21858, 12603.148)(175.1494, 1772.4698)(154.51584, 5305.1064)(189.36618, 13485.883)(189.16661, 190.80666)(195.45868, 8952.333)(196.84312, 5304.8057)(178.24342, 8198.99)(178.87158, 9274.659)
CPD-225	<i>trans</i>-aconitate	2442016	1928694	1951669	1591225	102657	1221747	1568650	1700200	400948	1980292	1857676	1890461	1	1855915	1871879	1	1910225	1853924	282423	1874087	479379	1850134	1798731	1704964	(170.992, 1198.2351)(154.90504, 12862.902)(154.9888, 12548.89)(172.00478, 8070.3955)(173.0118, 72.46)(155.23094, 87018.18)(158.28816, 313541.53)(159.00346, 26455.203)(189.02983, 6754.2686)(190.02951, 232.94772)(191.02794, 114.01333)(172.01544, 86.185)(198.9997, 79.96)(175.97627, 7449.563)
CIS-ACONITATE	<i>cis</i>-aconitate	2442016	1928694	1951669	1591225	102657	1221747	1568650	1700200	400948	1980292	1857676	1890461	1	1855915	1871879	1	1910225	1853924	282423	1874087	479379	1850134	1798731	1704964	(170.992, 1198.2351)(154.90504, 12862.902)(154.9888, 12548.89)(172.00478, 8070.3955)(173.0118, 72.46)(155.23094, 87018.18)(158.28816, 313541.53)(159.00346, 26455.203)(189.02983, 6754.2686)(190.02951, 232.94772)(191.02794, 114.01333)(172.01544, 86.185)(198.9997, 79.96)(175.97627, 7449.563)
CPD-16876	2-hydroxy-5-oxoproline	221029	204091	231967	226401	394838	196415	140888	219837	220595	218082	236704	1	1	24722548	158313	198181	174563	241722	238329	232457	1	1	20600718	1	(171.0243, 8464.39)(127.0234, 867159.8)(128.02429, 381.905)(129.02055, 331.72)(145.03366, 17050.273)(146.03485, 2729.92)(163.16974, 9879.773)(165.07132, 3942.5198)(166.87279, 3495.478)(167.0736, 2953.11)(146.87468, 4977.706)(146.17018, 21709.0)(148.3957, 660.46747)(149.06105, 431.395)
CPD0-2099	3,4,-dihydroxybutylphosphonate	412525	1	1	294055	331162	257555	500516	385995	464091	794412	1	1	327250	314729	311926	188226	1	1	1	349907	853163	1	1578454	715102	(171.0278, 8642.115)(173.03491, 2486.8152)(156.12408, 4900.299)(187.12315, 11708.875)(188.23372, 1170.0316)(192.0664, 16874.93)(169.2377, 2418.8308)(170.8013, 184.53499)(195.0285, 406.56)
3-DEHYDRO-SHIKIMATE	3-dehydroshikimate	146573	106041	1163712	206684	51680	2937087	302504	211417	170102	962773	1028823	536097	1942567	1729987	1415885	326411	577466	305997	196956	266902	1	1	1	680933	(171.29433, 17499.8)(172.03, 2168.05)(154.0234, 491.465)(173.0403, 119.44)(155.15787, 2392.3262)(191.92415, 12409.128)(193.99593, 13381.144)(194.0807, 52986.03)(173.80943, 3166.177)(175.56398, 2543.4875)(176.06946, 3951.9053)(199.03119, 635.20496)(176.34253, 8331.513)(177.0221, 204.87)
CPD-12266	serinol phosphate	619202	1	501931	270278	1	225183	227628	160328	180526	1	555465	540800	2376096	2302639	2353320	316275	226305	226716	305635	330032	327210	3233334	3253183	3305546	(171.59721, 2120.2952)(175.0349, 1896.09)(154.51535, 2704.2024)(155.0183, 894.85)(171.0253, 35230.074)(172.02393, 1270.1617)(153.77246, 1729.6523)(154.02444, 235.92499)(191.59749, 18938.615)(192.97685, 2697.8655)(171.3825, 10107.408)(175.05775, 224.81)(193.00694, 242.75667)(177.0058, 417.995)
CPD-9500	1,3,5-trimethoxybenzene	540535	412455	359145	1	539920	400479	592382	559613	853816	591834	518795	570121	751661	865833	622731	1	458240	1	415158	460600	429122	1206622	1297930	1408586	(171.64899, 7478.2544)(172.08894, 2477.8215)(173.0955, 131.47)(151.07452, 988.7734)(172.95142, 1957.4156)(174.095, 555.86)(152.46452, 13391.3545)(155.08496, 7529.346)(187.99945, 3219.1123)(189.4522, 974.7883)(168.10057, 25185.084)(169.10297, 2182.337)(192.73996, 7604.0825)(194.22318, 11630.766)(194.5812, 9574.07)(176.44914, 12639.748)(177.06856, 16955.156)
CPD-10208	(2E)-2-butylidene-4-hydroxy-5-methyl-3(2H)-furanone	540535	412455	359145	1	539920	400479	592382	559613	1	591834	518795	570121	1	865833	1	1	458240	1	415158	460600	429122	1206622	1297930	1408586	(172.01105, 1640.9153)(173.09363, 1775.5234)(151.07452, 988.7734)(173.0939, 2408.962)(151.97812, 1544.9929)(187.97408, 2028.6794)(189.78772, 1319.97)(168.10085, 26387.338)(169.10297, 2182.337)(192.60724, 5951.368)(194.08072, 6718.624)(194.0808, 11893.16)(176.62442, 12478.657)(177.06888, 14466.337)
L-SELENOCYSTEINE	L-selenocysteine	66445	914744	1	396647	213002	129024	1255247	131936	1482661	616900	719948	1541503	975069	1243357	1635504	1	1	393491	124357	53375	361249	831013	739544	1183514	(172.03107, 5132.3096)(167.63432, 5327.0415)(167.9641, 412.36)(149.9523, 2063.43)(175.23788, 1410.88)(157.41504, 66270.57)(159.58447, 37215.906)(159.97441, 9477.7705)(186.89664, 10618.166)(187.99924, 467.508)(188.99849, 3328.1199)(169.71048, 10994.895)(170.99187, 927.2146)(187.33652, 4267.721)(186.9591, 1995.7343)(200.9722, 38046.95)(175.45825, 1807.6925)
CPD-8686	9-oxononanoate	500791	421974	471775	4204913	4820601	614072	1559619	424816	396757	442244	1904909	423886	3122149	1	4098846	5243065	4190482	393611	2154087	493765	505030	242478	326613	393431	(172.31815, 1835.2008)(154.59552, 27316.887)(155.09792, 2288.5967)(156.10133, 1045.4884)(173.82823, 8758.736)(175.45288, 18889.951)(176.12129, 4337.91)(157.8358, 2959.1946)(159.11156, 2817.938)(191.61732, 7447.959)(192.81293, 1931.3251)(172.53046, 8380.631)(173.1258, 1883.0)(195.74773, 42561.242)(197.4986, 12766.384)(199.10652, 12596.965)(178.2662, 30138.639)(180.62027, 15136.878)(181.09644, 2724…
CPD-10209	2-butyl-4-hydroxy-5-methyl-3(2H)-furanone	2159047	2141408	2198387	2369314	3510576	1	2604904	2067498	2140617	1963231	1	2120397	1719250	1648430	1616675	3142936	2487625	1992902	2385623	2434166	2446345	880131	762951	971993	(172.47552, 438.77374)(172.77069, 1172.46)(154.03673, 44441.93)(155.90355, 5889.3125)(157.0959, 4866.13)(172.82857, 4357.964)(173.8605, 4843.8315)(155.79947, 7215.3057)(155.097, 1003.46497)(189.27501, 27086.79)(190.63422, 2443.6174)(190.1212, 127.47)(171.3506, 9944.41)(171.11409, 754.39996)(193.95053, 73704.96)(195.39082, 58651.367)(196.0886, 13994.306)(196.0838, 333.95)(177.71822, 18338.234)(178…
CPD0-1627	6-diazo-5-oxonorleucine	2917488	1	2037739	498594	450030	1	412486	1	1	952692	1	1	1	1	1	2420836	486749	1903687	790662	557831	1	1	502299	326191	(172.82524, 2626.2297)(174.0794, 3968.4)(154.63255, 5200.1597)(158.0697, 73.85)(159.0726, 2573.32)(174.20584, 2054.8462)(175.2528, 3302.585)(176.489, 5629.5283)(156.07129, 7952.115)(157.64465, 387.03)(159.07867, 226.74333)(190.10507, 14646.934)(191.10887, 3286.964)(192.1008, 1401.58)(173.8261, 1057.628)(175.9333, 5177.1235)(196.31181, 4355.642)(199.1715, 2880.852)(198.5657, 1415.28)(181.0629, 194…
CPD-9329	8-methyl-6-nonenoate	1221379	1199419	1153696	1525744	1758197	1705323	1256652	1209182	1210326	1263648	1146489	1283131	645355	601134	644419	1499003	1561509	1437697	1417559	1330606	1391610	296621	1	199358	(172.91454, 3441.0876)(172.1307, 2395.83)(151.11081, 37162.688)(152.11374, 2836.3914)(153.12654, 207.46667)(174.9186, 5898.6904)(153.52725, 512.85205)(188.1632, 4602.52)(193.46637, 6956.4126)(194.98228, 13442.934)(197.12589, 9748.837)(176.10834, 2932.5334)(179.117, 30487.95)
OROTATE	orotate	1	1	1	1	1	1	1	1	1	1	1	1	1	1	1	521517	513691	448890	1	1	1	445564	1	1	(173.04655, 480.0725)(155.03302, 8500.5)(156.0449, 105.69)(179.0003, 103.13)
CPD-1090	(-)-isopiperitenone	2649740	2467729	2130332	2710246	3189629	2693176	2622685	2427057	2496075	2534954	2416038	2671435	1750697	1632227	1684352	3921040	3867173	3129457	2637132	2509450	2484318	1965217	2148925	2045967	(173.09406, 2149.1594)(133.10045, 68978.66)(134.10323, 7297.5757)(171.14745, 850.76904)(151.11072, 41533.668)(152.11363, 3481.6985)(155.28365, 590.85504)
CPD-9976	(6<i>E</i>)-8-oxogeraniol	1262474	1236156	1196995	1546545	1809109	1705722	1302636	1222654	1259543	1318554	1181723	1317240	681400	620408	669084	1518255	1305095	1293657	1436878	1372107	1415272	1	586475	528217	(173.12874, 3374.3591)(151.24767, 36328.934)(152.11374, 2925.8896)(153.12643, 209.5343)(187.14679, 187.39)(168.1372, 23569.686)(169.13995, 1058.04)(193.63596, 12072.086)(194.45093, 9920.354)(173.09183, 1052.665)
CPD-8661	3&beta;-hydroxy-&beta;-cyclocitral	1	1	1	1	1	1	1	1	1	1	1	1	1	1	1	1	1	1	1	1	1	1	586475	528217	(173.1328, 259.23)(154.1219, 280.71)(168.1372, 23569.686)(169.13995, 1058.04)(191.1063, 1480.895)(173.09305, 2285.555)
CPD-9977	(6<i>E</i>)-8-hydroxygeranial	1	1	1	1	1	1	1	1	1	1	1	1	1	1	1	1	1	1	1	1	1	1	586475	528217	(173.1328, 259.23)(154.1219, 280.71)(168.1372, 23569.686)(169.13995, 1058.04)(191.1063, 1480.895)(173.09305, 2285.555)
CPD0-1264	suberate	257568	268715	249549	593907	245209	440346	672215	476509	516613	423199	912018	453666	559649	950868	460379	343313	400134	1	249135	252437	229346	583841	861972	1028403	(173.1648, 4083.4973)(173.0778, 708.555)(156.56744, 3985.6274)(156.56836, 2973.495)(157.075, 380.11)(174.46832, 3804.9492)(175.46144, 3447.4512)(176.089, 2069.92)(158.1369, 4356.1675)(159.08237, 3118.7468)(191.98076, 42185.496)(191.44261, 2187.0732)(174.24391, 5072.0728)(175.10103, 1865.61)(196.49893, 9525.28)(198.21571, 19135.303)(199.86986, 6482.032)(179.36717, 5132.363)(180.18835, 8648.301)(18…
CPD-7100	(2<i>S</i>)-2-isopropyl-3-oxosuccinate	1	457044	131295	148563	324112	188092	286594	265577	259887	159814	235800	136410	135121	313826	328514	232051	170699	133240	448286	434228	301229	493278	489729	490135	(173.3742, 438.17334)(156.7011, 2041.1768)(175.94228, 686.8589)(155.86858, 3543.2131)(156.0439, 204.65)(192.18317, 14207.117)(193.28056, 6166.5884)(194.0806, 13858.28)(173.75923, 5282.2)(176.79657, 14994.98)(177.06825, 17169.016)(196.53105, 416.86124)(179.35738, 440.86)
CPD-6121	1-(3-aminopropyl)-4-aminobutanal	645585	457238	703714	1197715	1931160	1424882	940312	760818	711957	361138	201430	209034	919279	925808	938832	2072518	1578565	1562137	398782	400455	393851	799314	904177	904076	(173.42693, 6922.0156)(129.13777, 8092.9946)(151.1213, 6561.92)(146.16423, 42611.05)(147.16718, 2767.3562)
CPD-3617	decanoate	199600	182346	247763	243112	548118	384824	1	187070	1	136679	484335	122567	1779836	377165	1	225782	216430	347718	183564	179581	178954	1	281410	291393	(173.8109, 4392.2544)(175.1479, 573.31335)(153.12646, 8466.882)(174.1472, 6473.23)(156.13731, 10056.901)(195.57732, 13418.592)(196.34595, 6169.113)(198.94362, 796.078)(177.5742, 6525.4766)(178.43532, 4937.906)
CPD-20277	swainsonine	1057063	1011762	1478243	3254097	2045545	2494952	942350	1	1	3390687	2439308	8260154	1964923	1888335	1834632	5835372	2936648	2676889	1341768	2023592	2392738	3407227	3157761	7679146	(173.93031, 1276.1763)(156.68729, 1417.909)(157.59972, 573.97833)(158.1041, 536.2)(174.58461, 6401.5615)(176.1207, 1611.81)(177.1155, 82.24)(192.0009, 18284.22)(192.49644, 3533.5588)(193.1452, 731.59503)(173.13007, 9548.135)(196.09503, 22424.719)(197.09639, 5133.4653)(198.09196, 644.03)(178.08275, 29184.27)(179.0814, 7442.185)
HYDROXYNAPHTHOQUINONE	juglone	1817597	2272602	1673887	1	1439444	336169	2487530	1937148	2775542	3303919	3219513	2752314	978510	1996785	1012594	1237318	981730	948079	1765479	1896828	1797314	2629074	3479806	2417732	(174.03575, 178.91501)(178.04955, 239.04167)(160.53821, 175.51501)(160.0385, 251.31)(192.06575, 32271.7)(193.06653, 2380.7454)(174.14577, 2275.3403)(175.19966, 250.83713)(177.068, 14209.72)(201.0368, 314.78333)(182.0235, 1047.95)
CPD-0	5,7-dihydroxy-2-methylchromone	1	682120	1	1	1347022	2154624	2607962	1	3074301	968709	3604830	3662996	708171	726778	1	1	1	1829669	1	1	1	1	1	3471230	(174.0358, 288.05)(196.06123, 7306.3804)(178.0499, 180.95)(210.0755, 14277.601)(211.07114, 707.91296)(192.06557, 31399.514)(193.06517, 2850.3525)(218.78818, 411.495)(200.0329, 132.77333)
CPD-14453	isoscopoletin	1	682120	1	1	1347022	2154624	2607962	1	3074301	968709	3604830	3662996	708171	726778	1	1	1	1829669	1	1	1	1	1	3471230	(174.0358, 288.05)(196.06123, 7306.3804)(178.0499, 180.95)(210.0755, 14277.601)(211.07114, 707.91296)(192.06557, 31399.514)(193.06517, 2850.3525)(218.78818, 411.495)(200.0329, 132.77333)
SCOPOLETIN	scopoletin	1	682120	1	1	1347022	2154624	2607962	1	3074301	968709	3604830	3662996	708171	726778	1	1	1	1829669	1	1	1	1	1	3471230	(174.0358, 288.05)(196.06123, 7306.3804)(178.0499, 180.95)(210.0755, 14277.601)(211.07114, 707.91296)(192.06557, 31399.514)(193.06517, 2850.3525)(218.78818, 411.495)(200.0329, 132.77333)
CPD-9831	isoscopoletin	1	682120	1	1	1347022	2154624	2607962	1	3074301	968709	3604830	3662996	708171	726778	1	1	1	1829669	1	1	1	1	1	3471230	(174.0358, 288.05)(196.06123, 7306.3804)(178.0499, 180.95)(210.0755, 14277.601)(211.07114, 707.91296)(192.06557, 31399.514)(193.06517, 2850.3525)(218.78818, 411.495)(200.0329, 132.77333)
2-D-THREO-HYDROXY-3-CARBOXY-ISOCAPROATE	(2<i>R</i>,3<i>S</i>)-3-isopropylmalate	509468	1	1	1	1	1	1	1	1	1	1	1	1	181620	497233	1	1	1	1	1	1	404547	469133	1006351	(174.0536, 1741.6859)(156.71489, 2392.1335)(160.0556, 7174.0)(175.05695, 2216.175)(158.55145, 3041.9775)(161.0579, 278.62)(194.4261, 74873.305)(196.84766, 57288.055)(197.0958, 27885.81)(174.91136, 4827.9565)(199.24626, 577.38605)(201.72026, 4558.687)(181.03917, 877.73663)
CPD0-2267	&alpha;-ethyl-L-glutamate	1	1262563	1245052	1	1078603	1	640489	1828959	1275431	849002	1	1317938	3898991	4135918	1530410	1698307	1279911	1111748	1286641	1	1267920	1876684	1076579	1579617	(174.07648, 5050.4756)(156.90175, 7571.2617)(158.24013, 2492.5132)(161.0756, 1097.11)(175.4554, 8375.056)(177.73741, 2196.57)(157.50438, 13604.847)(158.53717, 1373.2339)(159.73854, 4279.5757)(194.11588, 15163.666)(196.05731, 17735.406)(197.1257, 19475.51)(175.4037, 3205.232)(179.1081, 823.6)(199.64282, 5856.9424)(200.87476, 6426.9224)(201.40651, 4289.0835)(201.57166, 3823.275)(182.25299, 4067.868…
DIAMINONONANOATE	7,8-diaminopelargonate	1	1	1	147199	228723	175146	130492	114304	105309	99713	1	91701	1	1	1	358931	1	1	1	1	1	1	1	1	(174.1585, 1433.37)(189.15826, 9331.735)(190.16205, 264.615)
3-CARBOXY-3-HYDROXY-ISOCAPROATE	(2<i>S</i>)-2-isopropylmalate	509468	474127	1	346759	1	1	286259	171203	1	299766	294962	386420	662948	1	497233	1	1	1	457028	147413	442814	404547	469133	1006351	(174.30515, 2432.4614)(157.54936, 5817.1875)(160.55624, 4040.1)(176.86723, 13825.891)(159.59291, 8781.139)(161.05887, 20914.924)(162.05965, 5467.7266)(194.08998, 57640.574)(195.91429, 21416.701)(196.26117, 12303.083)(174.40887, 5756.8115)(198.92068, 3402.7)(200.85092, 3559.3586)(201.5487, 13712.825)(180.1362, 1645.517)
SHIKIMATE	shikimate	691474	290377	422319	284001	784280	1	1361500	416647	383803	361215	343304	1381108	1295909	240523	3778836	960043	422547	237757	313860	275856	506647	1133947	1430987	300891	(174.59483, 639.78)(155.4622, 3266.6736)(156.03766, 308.78668)(174.74791, 1939.1001)(175.38826, 184.12666)(158.10025, 7731.4814)(159.75049, 2350.765)(191.14241, 10819.387)(192.08545, 1097.285)(174.28773, 10602.067)(175.07028, 4508.8423)(175.06094, 933.65594)(197.73642, 4721.5977)(200.24582, 10184.512)(201.04666, 22932.78)(179.02399, 381.15)
INDOLE_ACETATE_AUXIN	(indol-3-yl)acetate	117403	122164	380140	732350	195260	624205	174711	236492	140597	154520	162164	146987	458613	134143	157622	265941	469749	477578	137393	350669	165605	109676	469963	1043600	(174.72394, 3936.9426)(179.06485, 697.21497)(158.04956, 7114.424)(160.15482, 4587.484)(161.0601, 19338.65)(176.64738, 16665.273)(177.87079, 8227.221)(179.40742, 680.74335)(180.0759, 821.39)(159.93799, 1010.1537)(195.20168, 11766.403)(195.09734, 8849.532)(196.5989, 112672.97)(197.0975, 32790.83)(174.4332, 6217.9414)(175.08276, 872.51624)(199.82845, 1052.0322)(201.05766, 2858.066)(201.39091, 2206.3…
CPD-11688	1,8-dihydroxy-3-methylnaphthalene	590622	213634	977094	395529	1	370058	1012948	1664167	1	1	2927544	1	1	1	1	1436761	470435	439533	1150181	685776	771156	1	1	633673	(174.95967, 4920.799)(177.32533, 1619.2676)(178.581, 2002.325)(179.0769, 173.41)(158.92307, 1013.97424)(160.07199, 2410.28)(161.071, 5327.52)(177.90022, 14532.5)(179.08234, 7064.24)(180.08809, 31867.88)(159.70897, 3141.8748)(160.93237, 4104.8228)(161.57753, 2629.5251)(162.0789, 2886.94)(192.30103, 10673.391)(193.09712, 2736.3835)(176.76596, 1618.7675)(177.1017, 6928.925)(199.429, 1770.8846)(200.6…
threo-ds-iso-citrate nullnullnull 0.105 :4	#N/A	77296160	1	1	1	1	1	1	1	1	1	1	1	1	1	1	1	1	1	1	1	1	1	1	1	(175.017, 818963.75)(176.0199, 47657.04)(177.0247, 12640.46)(215.0731, 516.26)(193.0536, 3453.63)(215.0155, 8666.15)(197.0042, 107048.25)(198.0045, 12560.36)(199.0009, 106.39)
CPD-536	glycerol 2-phosphate	1	1	1	153976	116534	137051	1	1	1	1	1	1	1	1	1	1	147700	1	1	1	1	112296	1	1	(175.01717, 41943.88)(176.0216, 309.71)(157.00714, 3414.858)(158.00215, 60790.39)(179.98915, 549.005)
GLYCEROL-3P	<i>sn</i>-glycerol 3-phosphate	1	1	1	153976	116534	137051	1	1	1	1	1	1	1	1	1	1	147700	1	1	1	1	112296	1	1	(175.01717, 41943.88)(176.0216, 309.71)(157.00714, 3414.858)(158.00215, 60790.39)(179.98915, 549.005)
threo-ds-iso-citrate nullnullnull 0.105 :10	#N/A	1	1	1	1	1	1	1	1	1	37112844	1	1	1	1	1	1	1	1	1	1	1	1	1	1	(175.0173, 598102.2)(176.0198, 37779.74)(177.0268, 3420.05)(193.0577, 590.25)(215.0155, 7952.37)(197.0042, 85332.95)(198.0044, 10472.0)(199.0013, 549.69)
threo-ds-iso-citrate nullnullnull 0.105 :22	#N/A	1	1	1	1	1	1	1	1	1	1	1	456749	1	1	1	1	1	1	1	1	1	1	1	1	(175.0173, 646324.2)(176.0198, 40351.89)(177.0276, 2689.44)(215.0155, 8245.85)(197.0043, 92378.82)(198.0043, 11211.81)
threo-ds-iso-citrate nullnullnull 0.105 :18	#N/A	1	1	1	1	1	1	1	1	1	1	53059352	1	1	1	1	1	1	1	1	1	1	1	1	1	(175.0174, 551070.1)(176.0199, 34568.2)(177.0273, 5022.15)(215.074, 466.5)(193.0573, 1006.37)(215.0157, 7105.21)(197.0043, 74771.56)(198.0046, 9186.29)(199.0008, 301.43)
threo-ds-iso-citrate nullnullnull 0.105 :9	#N/A	1	1	56088136	1	1	1	1	1	1	1	1	1	1	1	1	1	1	1	1	1	1	1	1	1	(175.0175, 581131.3)(176.02, 36666.66)(177.0271, 5205.09)(215.0733, 467.15)(193.0573, 1086.5)(215.0157, 7187.2)(197.0044, 80960.86)(198.0046, 9668.83)
L-DEHYDRO-ASCORBATE	L-dehydro-ascorbate	78474032	58863048	56921240	60264068	1	55734316	2411638	56875624	57307188	38812056	53906364	56904796	49583868	51162552	50414080	399751	53097560	51563584	51262856	50952008	52782976	50990432	50631652	47288524	(175.0175, 600576.8)(176.02011, 37152.863)(177.02701, 6192.1313)(156.00835, 5765.7817)(159.45778, 183.12498)(160.01958, 137.94142)(161.0269, 813.64)(192.45503, 676.4921)(177.0427, 62.78)(197.0045, 85379.25)(198.00478, 10181.425)(199.0013, 575.9136)(178.9916, 4371.4224)
threo-ds-iso-citrate nullnullnull 0.105 :13	#N/A	1	57954048	1	1	1	1	1	1	1	1	1	1	1	1	1	1	1	1	1	1	1	1	1	1	(175.0175, 600993.2)(176.02, 38144.45)(177.0265, 5220.51)(215.0728, 427.49)(193.0572, 1758.43)(215.0157, 7634.61)(197.0044, 90832.16)(198.0047, 10562.42)
CPD-5541	phenylmethanesulfonyl fluoride	78505744	59012616	57024152	60339296	1	55780752	2226934	56914672	57390504	1	53959040	56982780	49622488	51768104	50423372	71090256	53148012	50598720	52721104	50999560	52819836	50239440	50656028	47289796	(175.01752, 596819.7)(177.0099, 63.54)(156.00836, 5637.4224)(175.68666, 386170.97)(176.02025, 35750.47)(159.61447, 90.914)(192.52261, 512.00354)(176.78764, 67.3025)(197.00453, 84715.51)(198.00478, 10073.753)(199.00124, 579.6681)(178.99167, 4265.15)
CPD-13907	dehydroascorbate (bicyclic form)	77296160	57954048	56088136	59383524	53318056	1	1	55908844	56368128	37112844	53059352	456749	1	1	49632356	1	53335988	49670940	50753812	50258032	51392008	47410880	48705572	47709204	(175.01752, 601059.2)(176.02013, 37351.28)(177.02711, 5923.548)(215.07343, 330.37997)(193.05562, 1193.9434)(215.01596, 7324.2593)(197.00453, 85980.414)(198.05717, 9743.186)(199.00111, 527.16504)
threo-ds-iso-citrate nullnullnull 0.105 :0	#N/A	1	1	1	1	53318056	1	1	1	1	1	1	1	1	1	1	1	1	1	1	1	1	1	1	1	(175.0176, 557596.3)(176.0203, 33210.39)(177.0286, 9928.96)(215.0755, 619.36)(193.0569, 2215.4)(215.0166, 7205.2)(197.0048, 79337.59)(199.0007, 358.93)
threo-ds-iso-citrate nullnullnull 0.105 :11	#N/A	1	1	1	1	1	1	1	1	1	1	1	1	1	1	1	1	1	1	1	1	1	47410880	1	1	(175.0176, 577518.25)(176.0202, 36279.68)(177.0275, 5790.5)(215.0742, 201.58)(215.0159, 7038.89)(197.0046, 83014.37)(198.0049, 9989.55)(199.0012, 793.1)
threo-ds-iso-citrate nullnullnull 0.105 :2	#N/A	1	1	1	1	1	1	1	1	1	1	1	1	1	1	1	1	1	1	1	50258032	1	1	1	1	(175.0176, 580872.44)(176.0202, 36436.77)(177.0274, 6056.36)(215.0742, 237.01)(215.0159, 7443.13)(197.0046, 82350.95)(198.0048, 10028.49)(199.0008, 845.33)
threo-ds-iso-citrate nullnullnull 0.105 :14	#N/A	1	1	1	1	1	1	1	1	1	1	1	1	1	1	1	1	1	49670940	1	1	1	1	1	1	(175.0176, 580979.5)(176.0202, 36944.71)(177.0268, 5444.04)(215.0709, 256.19)(215.016, 7051.44)(197.0046, 84321.49)(198.0049, 9849.96)(199.0013, 884.67)
threo-ds-iso-citrate nullnullnull 0.105	#N/A	1	1	1	1	1	1	1	1	1	1	1	1	1	1	1	1	1	1	1	1	1	1	48705572	1	(175.0176, 589004.5)(176.0202, 36465.39)(177.0276, 5165.26)(215.0732, 196.86)(215.016, 6920.82)(197.0046, 92404.05)(198.0047, 10868.1)(199.0014, 819.72)
threo-ds-iso-citrate nullnullnull 0.105 :25	#N/A	1	1	1	1	1	1	1	1	56368128	1	1	1	1	1	1	1	1	1	1	1	1	1	1	1	(175.0176, 591749.7)(176.0202, 36801.89)(177.0274, 5287.15)(215.0731, 379.88)(193.0567, 1042.46)(215.0163, 6977.84)(197.0046, 81944.21)(198.0049, 9686.48)
threo-ds-iso-citrate nullnullnull 0.105 :7	#N/A	1	1	1	1	1	1	1	1	1	1	1	1	1	1	1	1	53335988	1	1	1	1	1	1	1	(175.0176, 606454.25)(176.0201, 38377.35)(177.0263, 6508.45)(215.0749, 192.14)(215.0162, 7602.72)(197.0045, 95734.7)(198.0047, 11167.0)
threo-ds-iso-citrate nullnullnull 0.105 :24	#N/A	1	1	1	1	1	1	1	1	1	1	1	1	1	1	1	1	1	1	50753812	1	1	1	1	1	(175.0177, 583326.9)(176.0203, 36247.19)(177.0274, 6565.28)(215.073, 223.83)(215.0162, 7041.67)(197.0047, 83139.09)(198.0049, 9869.85)(199.0016, 232.97)
threo-ds-iso-citrate nullnullnull 0.105 :1	#N/A	1	1	1	1	1	1	1	1	1	1	1	1	1	1	1	1	1	1	1	1	51392008	1	1	1	(175.0177, 583898.5)(176.0202, 36496.84)(177.0273, 6025.68)(215.074, 235.79)(193.0488, 129.66)(215.0159, 7626.96)(197.0046, 84188.41)(198.0048, 10007.52)
threo-ds-iso-citrate nullnullnull 0.105 :26	#N/A	1	1	1	1	1	1	1	1	1	1	1	1	1	1	1	1	1	1	1	1	1	1	1	47709204	(175.0178, 580778.0)(176.0203, 36227.97)(177.0276, 4220.13)(215.0739, 192.5)(193.0582, 323.37)(215.016, 6612.09)(197.0048, 83227.11)(198.0051, 9653.83)(198.9997, 77.0)
CPD0-1558	&beta;-2-thienyl-D,L-Alanine	7456047	1	5960682	407804	401565	207340	5739303	364899	260042	477607	5505679	5737604	4760725	5704729	5362796	515297	5996297	1	390737	5809823	457082	260084	227083	5626054	(175.03462, 292.035)(155.11966, 323.52097)(158.02177, 177.14667)(173.04199, 128.41501)(154.40988, 971.92316)(189.36911, 24189.064)(190.07701, 500.40335)(172.29715, 1118.9337)(174.05582, 1114.6543)(174.3872, 1913.1266)(175.0559, 950.25)(198.13702, 246.69)(176.00964, 14691.346)
ALLANTOATE	allantoate	513307	2203706	319462	437445	3468361	2421269	550679	482098	564292	313890	283092	374482	1	484986	507256	487749	386954	736420	515438	1	494714	761666	1	337127	(175.0505, 165.9)(161.04471, 761.135)(180.01772, 24596.465)(181.06529, 6961.685)(160.75586, 3326.2012)(162.23363, 1565.0581)(193.51161, 31579.426)(195.35747, 7838.726)(196.92444, 5957.1646)(176.07101, 6270.7056)(178.92151, 6312.3296)(179.0805, 5364.7563)(200.64131, 555.17596)(201.7121, 510.07666)(202.0472, 642.94)(185.03888, 953.39746)
INDOLE-3-ACETALDOXIME	(<i>E</i>)-(indol-3-yl)acetaldehyde oxime	1	1	1	1	1	1	1	508723	1	1	513208	1	556972	1	377963	1080056	1	1	431655	1	1	416313	1	425868	(175.0847, 12975.19)(176.0803, 399.64)(157.07072, 39955.68)(158.07198, 6718.1694)(178.49501, 1994.3762)(158.83202, 3514.7786)(158.079, 696.42)(194.11618, 13089.623)(197.1257, 13851.11)(199.45421, 4253.221)(200.57983, 2264.1675)(180.56602, 2905.266)(182.56732, 2509.7651)
CPD-13028	(<i>Z</i>)-indol-3-ylacetaldoxime	562102	478774	1	503715	972214	1	1	508723	469901	1	1	507693	556972	1	377963	1080056	433822	1146592	431655	600843	558297	416313	1	425868	(175.08485, 12086.035)(176.0827, 323.325)(157.0707, 40984.285)(158.0722, 7102.3374)(176.94907, 2985.7397)(158.84665, 3866.413)(158.7473, 993.1333)(194.11604, 12987.675)(195.92264, 5897.21)(199.19594, 4424.1274)(200.58075, 2149.095)(180.18239, 2485.0835)(182.5675, 2374.1362)
ARG	L-arginine	8899095	7598561	7969133	976522	3597180	3094769	841422	1487550	1435108	9681523	15262070	17308806	8943694	7850668	6579571	506157	6493511	5785293	1114734	7206717	6989298	11587152	25400354	12893651	(175.11794, 88200.48)(176.12218, 7893.4053)(161.11804, 267.50333)(176.1247, 8872.446)(158.11679, 15294.964)(159.118, 1244.1439)(194.23512, 2736.4348)(198.1104, 12422.551)(199.11258, 1419.5349)(180.10002, 106809.92)
CPD-8915	gramine	3506523	4027623	3796402	2901960	3143005	2820055	3092844	3393125	3367731	3072200	3596912	3665199	1518268	1477595	1591143	3118293	2848995	2257135	3182887	3662456	1	973440	480132	685762	(175.12143, 76741.2)(176.12242, 9820.497)(177.13605, 2495.0886)(198.11324, 8510.847)(199.10786, 800.899)(200.1074, 90.89)
CPD-13371	pseudoionone	1	1	1	1	1	1	1	1	1	1	1	1	1	1	1	1	1	1	1	1	1	498044	546305	485025	(175.14705, 14372.62)(176.15047, 783.64667)(192.17303, 3952.4167)
CPD-469	<i>N</i>-acetyl-L-glutamate 5-semialdehyde	260558	229120	140206	303981	1	370436	270064	462941	1	270959	1	235763	2275821	2221964	2496324	163141	192173	1	1	512128	242892	6023490	4157721	6077838	(175.24475, 6095.848)(177.06854, 16499.135)(154.04991, 75250.04)(155.0526, 11431.1455)(174.61864, 8234.788)(157.99525, 2613.133)(159.73647, 3131.9617)(191.62602, 8096.4604)(193.64388, 9115.598)(194.10666, 25538.643)(173.27534, 924.4919)(174.7569, 3485.3767)(177.1001, 2527.75)(199.05705, 1314.6183)(200.0665, 397.38)(181.05016, 3875.73)(182.05087, 2328.942)
N-ALPHA-ACETYLORNITHINE	<i>N</i>-acetyl-L-ornithine	373728	486239	2178667	629203	2642173	1135230	663702	685378	3070631	511401	556804	444930	2605092	3669709	3873171	592016	833745	699537	650423	1356957	592872	1743499	3355090	1	(175.40384, 4075.082)(177.11096, 277.8)(158.6513, 1704.3644)(160.09567, 1665.365)(161.1033, 2117.4768)(176.63863, 9855.883)(178.12, 52.69)(158.51273, 7192.8804)(159.50157, 2075.81)(162.11276, 241.93997)(192.71281, 16339.166)(194.88889, 2045.88)(196.1398, 631.97)(176.7518, 19961.832)(177.13576, 1720.2965)(197.77568, 5338.477)(199.76358, 5947.7334)(201.10088, 8728.507)(202.10474, 8699.31)(179.08047…
CPD0-1690	L-indospicine	939968	475579	447781	1	730673	21868560	1036466	1256752	888219	639385	670878	938143	14149275	13641780	13550345	31660172	1104406	1	16937704	17542532	18326314	930639	992537	20493992	(175.6945, 38972.438)(158.11539, 7358.934)(159.11702, 1211.3633)(180.1422, 8145.24)(160.63092, 3621.14)(193.16035, 929.0251)(174.73785, 11241.368)(175.48262, 1444.0)(197.61583, 244151.61)(199.1696, 32981.004)(199.1141, 5546.172)(180.289, 71884.4)(181.60783, 13587.222)(182.10551, 916.6066)
CPDQT-423	methyl indole-3-carboxylate	1	1	1	1091195	1189370	771958	6098973	3923585	6142451	1	4818001	1	11785674	11428502	11284142	1	1	1	2937758	1	524799	1	13877831	10743972	(175.8527, 3584.9863)(177.06836, 15566.207)(178.0665, 245.71)(157.04938, 543.6145)(176.07024, 9463.634)(159.7096, 1040.9193)(160.85449, 2417.5366)(161.98128, 6064.0356)(162.40463, 555.70337)(163.0763, 566.65)(193.0959, 44479.457)(194.0976, 5175.782)(195.09514, 228.14336)(175.0854, 7787.8745)(199.05624, 1581.1302)(201.62, 1385.5577)(202.8172, 674.9225)(203.068, 90.88)(181.26372, 1501.5623)(182.719…
CPD-18128	arabidopaldehyde	570085	461357	475812	483494	617616	499795	579984	449741	422165	473373	481170	470271	505871	479688	524839	549155	388960	319223	403581	430663	417341	498783	478721	482675	(176.0097, 16558.533)(177.01689, 196.09332)(212.0493, 180.94)(196.04692, 634.81586)(202.87933, 5997.97)(203.0047, 4590.62)
CPD-18133	<i>iso</i>-arabidopaldehyde	570085	461357	475812	483494	617616	499795	579984	449741	422165	473373	481170	470271	505871	479688	524839	549155	388960	319223	403581	430663	417341	498783	478721	482675	(176.0097, 16558.533)(177.01689, 196.09332)(212.0493, 180.94)(196.04692, 634.81586)(202.87933, 5997.97)(203.0047, 4590.62)
CPD-8095	3-(2-propenoic acid)-4,6-hydroxy cyclohexa-2,5-dienone	569860	364835	1	485937	618670	1	460216	456567	416177	340861	1	256857	357890	346152	542276	510578	1	335327	409806	258581	321248	350468	372240	1	(176.0097, 17990.287)(177.0228, 223.75)(216.61017, 10128.504)(196.04686, 929.5672)(220.6028, 38200.285)(222.02657, 9816.73)(202.77428, 5073.6177)(204.00726, 2125.9133)
CPD-12182	<i>N</i>-phenylsuccinimide	1243906	1454767	1485402	1091195	1189370	771958	6098973	3923585	6142451	1276908	4818001	1398197	11785674	11428502	11284142	1	1517256	1549313	2937758	1538665	524799	390914	13877831	10743972	(176.02266, 3508.1548)(178.77426, 6419.9077)(179.07306, 717.88)(159.05455, 975.55444)(176.27048, 7411.332)(179.0806, 938.99)(181.0819, 261.88)(160.71904, 798.40906)(160.85449, 2417.5366)(161.98128, 6064.0356)(162.40463, 555.70337)(163.0763, 566.65)(193.31905, 34626.145)(194.0976, 5175.782)(195.09514, 228.14336)(175.08601, 15205.347)(176.09381, 1055.215)(199.19951, 1485.9381)(201.62, 1385.5577)(20…
CPD-7615	1-naphthoate	620391	2947165	539260	3746897	431041	3999692	1197081	321406	1	1	580147	273391	3094045	365098	319519	1	259633	7043643	3058148	1292122	423074	1	302364	196673	(176.0555, 231.38)(154.59453, 4786.469)(175.3118, 15394.359)(177.06812, 14021.773)(155.37599, 4973.4966)(156.04643, 6491.018)(189.4538, 46059.098)(191.20557, 10393.317)(193.08733, 39254.45)(171.73465, 4016.3364)(173.32515, 5645.7275)(175.0841, 6322.21)(199.04631, 3580.3787)(177.45532, 16091.55)
CPDQT-42	sulfanilamide	99057	1	1	351797	427066	1	164822	98953	1	1	81503	1	1	84052	81252	1	450760	449559	88409	89753	83860	156634	429899	406622	(176.34343, 5261.135)(176.69722, 3616.3464)(155.87611, 2177.9543)(158.73575, 1801.04)(159.0221, 3786.69)(174.53639, 2632.2566)(176.03755, 453.25)(158.77232, 784.1175)(159.0219, 3721.85)(191.817, 20805.07)(193.06557, 1659.3334)(172.39117, 5166.5723)(174.0538, 1953.74)(175.056, 489.52)(197.682, 1016.8767)(177.00668, 398.91248)
CPDQT-405	(<i>E</i>)-7-(methyltsulfanyl)heptanal oxime	9631048	8387440	9194965	1	8722976	3625068	1026195	3948839	9194602	1	7853803	1	3514623	2891167	2263494	1	1	1	8016921	8550439	7748106	1114695	1343203	1	(176.40448, 6598.5923)(177.7006, 22507.508)(180.0999, 8755.55)(158.20967, 4793.185)(160.45755, 1232.2136)(162.0894, 29727.3)(176.10555, 19097.94)(160.09593, 1478.6124)(193.13231, 16543.752)(194.13403, 795.79004)(175.83727, 52041.555)(199.52046, 6075.5117)(200.73242, 6883.1885)(201.72896, 3187.7627)(202.09547, 3535.1675)(182.08147, 30517.0)(183.01714, 2880.3862)(183.88193, 939.36395)(184.0861, 252…
CARBAMYUL-L-ASPARTATE	<i>N</i>-carbamoyl-L-aspartate	130016	1386307	2280428	113277	132557	252603	2500154	2518955	2766093	81419	60592	1	1	244249	1551480	161085	87667	79307	1765479	1375894	137377	713218	1	601965	(176.49344, 2474.0347)(177.28172, 1987.095)(177.0299, 2099.59)(158.40642, 1716.1532)(159.56891, 3133.5867)(160.77615, 3189.41)(161.02795, 5083.255)(175.03583, 4530.5596)(161.5347, 890.10004)(192.46466, 26342.234)(193.06746, 2261.2485)(175.30525, 1460.3094)(177.0583, 310.17752)(201.0314, 318.6)
L-AZASERINE	L-azaserine	270949	178259	214897	119439	311387	1	288400	184964	95198	1	128716	1	1	672499	456105	286827	1	1	1	171844	169366	268521	962805	274648	(176.80827, 905.4492)(179.0606, 507.1167)(157.37973, 5501.7217)(157.0369, 761.775)(175.3278, 4229.3555)(180.0648, 70828.49)(159.52357, 10704.944)(161.05699, 692.90753)(195.69548, 26324.363)(197.09758, 13145.011)(178.14354, 4866.3057)(198.868, 2791.0146)(200.85878, 12527.037)(201.81944, 8070.959)(202.0525, 9927.43)(183.41751, 2096.4165)
CPD-13505	iodate	355890	1	373278	1	1	452589	1335513	502835	1	1	1	1	1	1	1	312258	1	1	1	1	1	1	1	1	(176.89287, 3926.4587)(193.9281, 388.05)(202.88931, 3975.9219)
L-CITRULLINE	L-citrulline	1045402	926314	946001	337488	3080892	2620060	3929411	1244981	322307	1120772	4143824	6045459	1	1301378	1629679	5906790	6659809	2114683	1	3806241	1	1	1	9903013	(176.90094, 22604.896)(178.1025, 3747.61)(158.23123, 3462.853)(160.09421, 1583.79)(176.27132, 8214.042)(158.09067, 3573.7231)(193.13197, 17584.494)(194.1349, 166.17)(175.11859, 116376.23)(176.12074, 11097.781)(199.6419, 10154.705)(200.08765, 12007.132)(201.29025, 3236.0981)(202.0909, 5976.457)(181.67906, 36737.95)(182.9703, 22102.666)(183.83188, 2970.6602)(184.081, 385.38)(185.0812, 43.77)
CPD-318	monodehydroascorbate radical	69342536	51209588	1	1	1225487	49024264	47582576	1	1	49458760	47314456	37837612	43226156	1	43029344	66127132	47284016	47641048	44822440	44522780	1	1	1	40269060	(177.02708, 6789.4146)(160.01704, 144.30501)(176.03369, 101.77667)(160.89444, 525.4307)(162.02855, 452.91)(162.0317, 60.65)(193.05785, 1201.6237)(178.39238, 73.74)(199.0137, 5455.175)
ASCORBATE	L-ascorbate	69342536	51209588	2786868	350586	1225487	49024264	47582576	6179603	5887912	49458760	47314456	37837612	43226156	1	43029344	66127132	47284016	47641048	44822440	44522780	1	175689	217356	40269060	(177.02725, 6495.668)(179.0339, 515.86)(160.01704, 144.30501)(176.31787, 4378.3813)(180.04144, 599.98)(160.89444, 525.4307)(162.02855, 452.91)(162.0317, 60.65)(193.28546, 1504.2632)(196.0681, 309.12)(176.91183, 160.61429)(199.0137, 5455.175)
3-HYDROXY-ANTHRANILATE	3-hydroxyanthranilate	12249610	76427184	65822976	84489536	71712624	89904656	80145584	10718131	10126102	10746300	9803279	559234	47921280	5259831	47115564	80159600	12242498	63417432	72808584	77100288	11091188	25798092	25617648	3314883	(177.03073, 5010.4253)(179.70409, 270.58667)(135.02946, 66929.95)(152.0323, 1486.0634)(172.95038, 2877.7805)(173.7211, 3825.3984)(174.53603, 6077.3965)(174.88362, 12022.906)(175.085, 8133.19)(155.79674, 528.1358)(157.55396, 300.03497)(157.21072, 6540.9663)(152.05637, 1295832.6)(153.26337, 73273.71)(154.05359, 7929.1616)
CPD0-1715	6-methyl-H2-pterin	615885	701970	590104	569806	1	815610	882092	325402	1	407971	619174	444828	704756	645371	1	738355	1145836	872449	570769	533694	392771	637557	640819	916496	(177.0676, 15033.789)(178.07043, 869.76337)(160.05527, 12180.001)(161.17072, 13339.918)(162.14964, 4830.1284)(163.73012, 3560.133)(180.74493, 4114.038)(182.48103, 1404.514)(163.2502, 5925.023)(164.78246, 5189.911)(165.068, 784.36)(195.66827, 11222.692)(199.10692, 972.26996)(200.1073, 396.24)(179.28271, 7178.923)(178.9445, 1677.8615)(179.08047, 430.312)(204.00569, 3478.8513)(204.901, 4857.6997)
SEROTONIN	serotonin	1	1	1	1	12842798	10604714	9663228	6964254	7885913	1	1	1	1	1	8054349	1	1	1	1	1	1	11467322	1	11640867	(177.10114, 11474.373)(178.1066, 343.59)(160.71994, 1641.365)(164.10474, 619.0)(179.11705, 32162.13)(160.3887, 5501.7046)(198.14285, 3306.6147)(199.14212, 6171.3545)(181.13193, 22154.646)(200.69507, 2698.2058)(205.111, 348.66)(182.08105, 237844.06)(183.58238, 14174.369)(184.08365, 1136.22)
CANAVANINE	L-canavanine	6677952	6559003	1	2485669	9595666	1826374	8779105	1	2866498	1	2860768	2735729	1270687	11602718	3694517	1	6610599	7107956	5662970	5414336	6073433	3170726	1	5829220	(177.10118, 18678.166)(178.1026, 9333.68)(160.08913, 1790.0665)(160.0887, 315.78)(181.56845, 5572.4507)(181.1176, 1291.15)(161.0973, 2592.3616)(164.60394, 12447.925)(196.31905, 10217.594)(198.74149, 5732.432)(179.81194, 7475.9375)(180.70253, 10693.951)(202.30139, 7400.138)(201.59126, 1209.9861)(182.34258, 101632.43)(184.83301, 13974.328)(184.08472, 1484.3566)
GERANIOL	geraniol	4472945	4537488	4193803	5015823	3860366	5639117	2387913	2293355	4426178	4548660	4243860	4782881	1	1	1	4333569	4767287	4445023	3010598	4540761	2999098	1	1	332873	(177.12627, 66544.47)(178.1269, 12030.9)(137.13171, 2106.98)(156.13716, 7083.423)(158.1527, 321.6)(159.11578, 61396.363)(160.11871, 7247.6846)
CPD-8997	(3S)-linalool	4472945	4537488	4193803	5015823	3860366	5639117	2387913	2293355	4426178	4548660	4243860	4782881	1	1	1	4333569	4767287	4445023	3010598	4540761	2999098	1	1	332873	(177.12627, 66544.47)(178.1269, 12030.9)(137.13171, 2106.98)(156.13716, 7083.423)(158.1527, 321.6)(159.11578, 61396.363)(160.11871, 7247.6846)
CPD-8996	(3R)-linalool	4472945	4537488	4193803	5015823	3860366	5639117	2387913	2293355	4426178	4548660	4243860	4782881	1	1	1	4333569	4767287	4445023	3010598	4540761	2999098	1	1	332873	(177.12627, 66544.47)(178.1269, 12030.9)(137.13171, 2106.98)(156.13716, 7083.423)(158.1527, 321.6)(159.11578, 61396.363)(160.11871, 7247.6846)
CPD-685	(-)-<i>endo</i>-fenchol	4472945	4537488	4193803	5015823	3860366	5639117	2387913	2293355	4426178	4548660	4243860	4782881	1	1	1	4333569	4767287	4445023	3010598	4540761	2999098	1	1	332873	(177.12627, 66544.47)(178.1269, 12030.9)(137.13171, 2106.98)(156.13716, 7083.423)(158.1527, 321.6)(159.11578, 61396.363)(160.11871, 7247.6846)
CPD-1903	(+)-borneol	4472945	4537488	4193803	5015823	3860366	5639117	2387913	2293355	4426178	4548660	4243860	4782881	1	1	1	4333569	4767287	4445023	3010598	4540761	2999098	1	1	332873	(177.12627, 66544.47)(178.1269, 12030.9)(137.13171, 2106.98)(156.13716, 7083.423)(158.1527, 321.6)(159.11578, 61396.363)(160.11871, 7247.6846)
CPD-1909	(-)-menthone	4472945	4537488	4193803	5015823	3860366	5639117	2387913	2293355	4426178	4548660	4243860	4782881	1	1	1	4333569	4767287	4445023	3010598	4540761	2999098	1	1	332873	(177.12627, 66544.47)(178.1269, 12030.9)(137.13171, 2106.98)(156.13716, 7083.423)(158.1527, 321.6)(159.11578, 61396.363)(160.11871, 7247.6846)
CPD-1908	(-)-borneol	4472945	4537488	4193803	5015823	3860366	5639117	2387913	2293355	4426178	4548660	4243860	4782881	1	1	1	4333569	4767287	4445023	3010598	4540761	2999098	1	1	332873	(177.12627, 66544.47)(178.1269, 12030.9)(137.13171, 2106.98)(156.13716, 7083.423)(158.1527, 321.6)(159.11578, 61396.363)(160.11871, 7247.6846)
CPD-4887	(-)-(4<i>S</i>)-&alpha;-terpineol	4472945	4537488	4193803	5015823	3860366	5639117	2387913	2293355	4426178	4548660	4243860	4782881	1	1	1	4333569	4767287	4445023	3010598	4540761	2999098	1	1	332873	(177.12627, 66544.47)(178.1269, 12030.9)(137.13171, 2106.98)(156.13716, 7083.423)(158.1527, 321.6)(159.11578, 61396.363)(160.11871, 7247.6846)
CPD-4943	(+)-isomenthone	4472945	4537488	4193803	5015823	3860366	5639117	2387913	2293355	4426178	4548660	4243860	4782881	1	1	1	4333569	4767287	4445023	3010598	4540761	2999098	1	1	332873	(177.12627, 66544.47)(178.1269, 12030.9)(137.13171, 2106.98)(156.13716, 7083.423)(158.1527, 321.6)(159.11578, 61396.363)(160.11871, 7247.6846)
CPD-4261	1,8-cineole	4472945	4537488	4193803	5015823	3860366	5639117	2387913	2293355	4426178	4548660	4243860	4782881	1	1	1	4333569	4767287	4445023	3010598	4540761	2999098	1	1	332873	(177.12627, 66544.47)(178.1269, 12030.9)(137.13171, 2106.98)(156.13716, 7083.423)(158.1527, 321.6)(159.11578, 61396.363)(160.11871, 7247.6846)
CPD-7978	nerol	4472945	4537488	4193803	5015823	3860366	5639117	2387913	2293355	4426178	4548660	4243860	4782881	2285497	2083095	2260472	4333569	4767287	4445023	3010598	4540761	2999098	1236655	1494365	332873	(177.12628, 58733.86)(178.1269, 12030.9)(137.13171, 2106.98)(156.13719, 7156.8804)(158.15279, 3595.9768)(159.11578, 54635.14)(160.11871, 6466.3535)
CPD-11884	4-methoxycinnamate	3559133	5430535	5146818	1013876	5443413	755580	5613302	5220849	742686	879446	4996324	3210672	1	4874548	4959182	6641603	5322635	4969574	5092317	5068991	1	1	5280477	4866072	(177.45845, 5009.2)(179.3949, 802.2033)(179.67668, 2160.5498)(182.0779, 540.88)(160.05371, 56437.215)(161.0518, 4382.269)(162.05688, 136.402)(195.0837, 729.32)(179.08191, 19251.322)(181.0872, 207.24)(201.37823, 20713.72)(202.52519, 12580.303)(203.14276, 27320.455)(204.05745, 645.2967)(184.51541, 7625.18)(185.04044, 15489.844)
N-HYDROXYL-TRYPTAMINE	<i>N</i>-hydroxyl-tryptamine	1	1806008	1	935487	1741184	1367129	1	1044437	1620382	1550617	4181352	1572531	582606	5672985	1871617	2403874	2356185	2318292	514489	790570	1010661	7095327	6645715	10134943	(177.4665, 9275.162)(180.10036, 73669.16)(158.1591, 10746.574)(159.22603, 1060.2571)(160.58875, 2084.855)(179.33836, 25755.33)(178.90558, 4418.702)(182.1157, 24761.84)(160.09299, 22723.844)(161.09578, 6803.6274)(164.1073, 16548.73)(195.94212, 16715.291)(198.28474, 4968.3975)(178.65309, 11108.977)(178.1255, 11795.48)(199.61386, 6599.955)(200.84015, 961.38)(201.59055, 526.625)(182.07777, 7345.013)(…
CPDQT-436	4-methoxy-3-indolylmethylamine	10757735	10556938	10433337	13559018	12842798	10604714	9663228	6964254	7885913	11418405	10742626	11756056	5699648	5539893	8054349	11461247	7875750	11020278	11785880	11507122	11994096	11467322	2991666	11640867	(177.50201, 11752.807)(180.10844, 364.44666)(182.116, 11173.33)(160.7873, 1769.4061)(163.10167, 1023.93994)(164.1069, 17366.37)(180.51918, 41303.855)(182.03455, 34774.72)(182.61914, 13281.782)(162.24452, 12566.935)(164.1075, 11551.832)(196.13904, 204248.69)(196.73962, 35425.895)(197.14053, 1234.138)(177.9274, 64588.79)(178.12758, 12795.208)(202.48166, 7311.921)(204.164, 1369.4718)(204.95981, 389.…
O-UREIDOHOMOSERINE	O-ureido-L-homoserine	15948031	662347	5177052	15235760	13378015	1	13649683	7274516	14264429	202396	6473161	7055207	8010324	10240518	10196487	1964194	1491668	13641453	5422644	13748355	562255	1460629	9427591	9825561	(178.01407, 50406.918)(178.9769, 10038.672)(181.0779, 117.42)(159.88542, 1376.8053)(161.7361, 281.06)(163.0717, 284.055)(178.47151, 19932.838)(179.7865, 1676.6031)(181.58936, 182.4925)(160.70985, 2711.7417)(162.74379, 895.05664)(163.577, 153.275)(195.98296, 29013.076)(197.00047, 2998.3945)(198.6144, 248.74127)(200.1159, 221.41)(178.1562, 17738.754)(180.10088, 23388.828)(181.1036, 5742.75)(201.320…
CPD0-1660	&alpha; -ethynylagmatine	1	1	1	1	207910	1	1	1	1	1	1	1	1	1	1	1	1	1	1	1	1	1	1	1	(178.1164, 348.33)(181.1205, 7826.02)
CPD-12395	1-(methylsulfanyl)-6-<i>aci</i>-nitrohexane	4988954	4021989	4315232	3644037	1	3229220	1	1	1175759	879130	1471917	1578613	4701173	4238943	1958054	2299140	1930175	1714398	654120	532999	547840	512504	1663844	1	(178.13245, 22106.236)(179.14415, 6144.302)(181.41443, 5220.587)(182.0802, 14680.96)(160.07295, 3357.6213)(163.30032, 15217.328)(163.73798, 7244.314)(164.0684, 7094.52)(180.67174, 28454.43)(181.09142, 12410.865)(162.07828, 2852.2651)(162.57793, 4479.5376)(163.0761, 387.18)(164.0755, 152.73)(195.56271, 14410.019)(197.1173, 3013.906)(197.116, 392.15)(178.20697, 24883.375)(180.90298, 17527.996)(182.…
CPD-14427	daphnetin	181615	1	154679	1	1	179112	1	1	1	1	1	1	1	1	1	102788	362444	385523	251902	1	254839	447601	479969	478091	(178.19066, 1831.4701)(164.0246, 221.78)(179.36864, 1769.31)(182.0441, 253.92)(196.69873, 7461.292)(200.0694, 1669.32)(179.05363, 431.67334)(201.0161, 16262.1455)(187.01837, 2463.211)
CPD0-1691	O-[L-norvalyl-5]-isourea	882962	980065	624744	963130	2542492	996968	904190	1173968	983945	942857	1108728	895409	1880478	574246	1401581	968731	1007854	985699	944430	1018917	951738	432068	412311	456407	(178.23076, 12685.835)(180.46631, 2021.6901)(181.1133, 1998.01)(160.62125, 2640.6353)(163.1023, 1358.83)(180.93932, 276901.22)(182.12213, 58155.066)(163.02715, 20778.646)(163.99767, 10107.674)(195.38737, 243029.44)(196.13869, 41132.79)(198.78246, 620.02185)(199.1464, 393.21)(177.82883, 50684.555)(178.12753, 12764.272)(202.10071, 42919.605)(203.5326, 5779.085)(201.0931, 137.58)(182.63268, 7226.797…
CPDQT-340	L-dihomomethionine	4988954	4021989	1	3644037	1	3229220	1	1133591	1	1	1	1	1	1	1	1	1	1714398	1	1	1	1	1	2173583	(178.24896, 24982.227)(179.08215, 9082.67)(159.4048, 2018.3048)(162.40279, 3542.7998)(164.0696, 6832.41)(179.66043, 24227.494)(181.09204, 11021.67)(161.41054, 3328.3318)(162.41261, 5276.92)(163.0761, 387.18)(164.0755, 152.73)(195.11183, 16639.58)(196.1176, 5917.815)(197.116, 392.15)(177.67473, 13622.933)(180.1019, 18655.34)(181.0998, 360.34)(200.35555, 5703.181)(201.07423, 424.08752)(184.34793, 2…
CPD-182	4-methylumbelliferone	16450793	14357738	16032078	9777530	14681402	10093725	23670060	20813288	21701056	19828012	20018644	21178540	20039468	20250126	19668344	5899432	5688483	5376996	13575597	1	13404949	24318918	22413908	23163274	(178.30215, 883.63995)(159.04288, 876.05)(180.06642, 7095.1636)(182.0726, 26531.89)(160.78711, 5575.9556)(194.0803, 528536.4)(195.08415, 63025.7)(176.2878, 5728.017)(178.0799, 845.3)(202.76526, 593.04)(203.0519, 696.21)
CPD-9828	herniarin	16450793	14357738	16032078	9777530	14681402	10093725	23670060	20813288	21701056	19828012	20018644	21178540	20039468	20250126	19668344	5899432	5688483	5376996	13575597	1	13404949	24318918	22413908	23163274	(178.30215, 883.63995)(159.04288, 876.05)(180.06642, 7095.1636)(182.0726, 26531.89)(160.78711, 5575.9556)(194.0803, 528536.4)(195.08415, 63025.7)(176.2878, 5728.017)(178.0799, 845.3)(202.76526, 593.04)(203.0519, 696.21)
CPD0-1458	1,3-propanediol-P	2829976	2840905	1389036	1630996	1791784	3066436	1424885	1597729	1662139	1479469	1334399	1	1249843	1583259	1373830	1698975	1520538	2541663	1364348	1363304	1249222	1954249	1224719	3055440	(178.32979, 82.91334)(139.00195, 1178.0233)(157.00797, 1847.1892)(159.0157, 17.575)(173.89531, 260.22357)(159.02222, 71.57)(158.98024, 6809.755)(154.06792, 352.6905)(155.0332, 1649.155)(156.0344, 311.99)
CPD0-1449	cumene hydroperoxide	274028	197643	1	406391	926745	529393	781666	438354	433753	330038	418624	1	289982	402734	782635	613263	444970	330015	388482	245542	416964	1	1	1	(178.39735, 5215.2593)(179.80045, 10261.239)(135.07957, 5111.621)(136.07321, 227.34)(154.69254, 2625.731)(157.09828, 7620.4087)(172.12424, 3133.6523)(173.1277, 8323.65)(159.16855, 7040.171)(162.07515, 38518.523)(152.1075, 3887.5762)(153.106, 154.66)
CPD-8097	esculetin	181615	648372	154679	419386	584644	179112	176917	419604	1	688756	393526	1	889531	207178	1281532	102788	362444	385523	251902	576790	254839	447601	479969	478091	(178.47174, 1837.2212)(163.45198, 421.86288)(165.0312, 357.71)(180.53978, 1269.545)(182.0441, 253.92)(163.697, 559.9)(166.03436, 823.12)(196.37965, 5850.424)(198.5669, 958.495)(178.55174, 289.35666)(201.01556, 7444.8047)(187.01784, 1668.3589)
PHENANTHRENE-RING	phenanthrene-ring	2119417	540862	2217544	2754614	2661052	2715239	2127646	2173167	2163347	904027	854813	695387	2011825	1998333	1	2746400	2975257	2951190	2366258	2401147	2389105	1537404	1063589	1372092	(178.83174, 8129.5547)(183.09053, 22354.463)(179.0814, 4095.1523)(196.41672, 68195.62)(197.42004, 5367.042)(198.49246, 842.4505)(200.12471, 2902.7)(201.12392, 4941.487)(204.21082, 4796.7456)(206.08398, 6014.182)
CPD-13770	dimethylselenoniopropanoate	3032365	2774811	608976	4051072	1156707	2491944	369080	1790071	996027	4345044	2654978	2385499	2888189	2977870	4846997	6519937	2275623	3285767	3318318	3636130	4136009	4184043	2447208	2237499	(178.99069, 4029.0186)(179.98914, 19377.86)(180.98877, 713.5532)(161.45149, 12531.067)(164.3501, 3510.657)(165.48026, 1837.2528)(170.9917, 798.45)(178.9943, 33014.277)(179.99255, 10302.741)(180.99124, 4873.284)(160.58759, 2020.8601)(165.382, 4914.834)(169.18712, 12594.798)(170.74124, 4277.235)(200.52357, 422.21)(188.3547, 349.46555)(200.97168, 33809.64)(201.97311, 9161.586)(202.96997, 10276.73)(2…
CPD-8094	(2Z)-3-(3,4-dioxocyclohexa-1,5-dien-1-yl)prop-2-enoate	4991311	4396669	2910420	4782341	1	4399826	4982921	3270597	2560371	4331013	4233313	4377034	4121063	4194104	4260359	6183881	4424244	3859742	4274928	4293095	4352849	4166291	4315553	2801254	(179.02348, 160.96333)(159.00345, 25523.775)(160.00356, 1341.8462)(161.67194, 285.47452)(197.05824, 127.2225)(182.055, 66.52)(201.00761, 3326.8687)(205.0154, 112.6)(185.00256, 9645.213)(187.00824, 1127.7059)
CPD-676	<i>trans</i>-caffeate	1	1	1	1	1	1	1	1	1	1	1	1	170049	164771	167475	1	1	1	1	1	1	406348	414610	407508	(179.03392, 11237.535)(181.0489, 1815.12)(163.03822, 77550.62)(167.0465, 534.36)(198.07549, 17165.402)(200.07382, 2297.156)(201.0749, 234.08)(180.06535, 26092.764)(183.065, 1300.2885)
P-HYDROXY-PHENYLPYRUVATE	3-(4-hydroxyphenyl)pyruvate	1	1	1	1	1	1	1	1	1	1	1	1	170049	164771	167475	1	1	1	1	1	1	406348	414610	407508	(179.03392, 11237.535)(181.0489, 1815.12)(163.03822, 77550.62)(167.0465, 534.36)(198.07549, 17165.402)(200.07382, 2297.156)(201.0749, 234.08)(180.06535, 26092.764)(183.065, 1300.2885)
CPD-15147	(<i>Z</i>)-3-(2,4-dihydroxyphenyl)-prop-2-enoate	1	1	1	1	1	1	1	1	1	1	1	1	170049	164771	167475	1	1	1	1	1	1	406348	414610	407508	(179.03392, 11237.535)(181.0489, 1815.12)(163.03822, 77550.62)(167.0465, 534.36)(198.07549, 17165.402)(200.07382, 2297.156)(201.0749, 234.08)(180.06535, 26092.764)(183.065, 1300.2885)
CPD-8098	<i>cis</i>-caffeate	1	1	1	1	1	1	1	1	1	1	1	1	170049	164771	167475	1	1	1	1	1	1	406348	414610	407508	(179.03392, 11237.535)(181.0489, 1815.12)(163.03822, 77550.62)(167.0465, 534.36)(198.07549, 17165.402)(200.07382, 2297.156)(201.0749, 234.08)(180.06535, 26092.764)(183.065, 1300.2885)
CPD-9502	3,5-dimethoxytoluene	1	1	1	1	1	1	1	1	1	1	1	1	1	1	1	1	1	1	1	1	1	1	1	392976	(179.0822, 7485.34)(180.0863, 450.17)(159.0676, 6882.83)(162.0748, 3298.24)
CPD-14043	<i>N</i>-hydroxyhomomethionine	4580626	3880743	342974	3778970	4811505	4064395	6333259	720374	4766735	941025	3367089	866277	1627495	1389698	2125483	1987967	3882180	440782	468853	911998	463208	8261585	7498493	8113219	(179.18452, 471.32266)(182.0526, 295.52)(162.8869, 25030.094)(164.04274, 4116.631)(180.06462, 49240.56)(181.72792, 749.49585)(184.0627, 3961.615)(162.09712, 4319.0767)(164.92905, 4530.2437)(166.0508, 11459.24)(197.86642, 5362.8677)(199.44218, 10119.669)(200.30914, 2938.5254)(179.12347, 14817.159)(181.1898, 2751.5334)(202.04372, 13449.992)(203.13702, 1502.0298)
IPRONIAZID	iproniazid	5931163	5824483	4837749	5371871	4666593	5747207	3903842	3675553	3827181	3754378	3466975	4000540	916470	1	964210	8752203	8070285	7365146	4633154	4746996	4849124	5551215	395228	399865	(179.27994, 132589.08)(180.19786, 23556.064)(181.21146, 1164.5634)(161.2382, 21606.842)(162.09386, 3991.5432)(163.0997, 272.97)(181.31781, 2019.2839)(182.11627, 3649.226)(183.40306, 329.19574)(163.72276, 1635.6345)(164.10596, 1023.385)(205.81856, 2876.2642)(204.43542, 1034.7233)(184.08609, 1738.58)(185.08005, 214.37)
PHENYLHYDANTOIN	D-phenylhydantoin	18188000	14607716	12741052	430686	435032	336866	1	350544	1	14076437	13537232	14065647	151729	136594	1807907	16589236	14498557	13751636	13707604	13905286	13985981	3252326	244972	1	(179.5645, 13372.664)(180.40053, 2658.95)(160.05324, 54264.562)(161.05577, 3058.295)(162.05806, 254.04668)(177.06877, 108254.086)(178.07152, 14143.472)(179.0666, 136.59)(160.05484, 27363.76)(161.5997, 22030.523)(162.5078, 8207.604)(164.0686, 8562.696)(196.46294, 20192.627)(196.59549, 9288.39)(199.1076, 1930.34)(178.86707, 9240.925)(181.0938, 15672.53)(200.41759, 3705.3613)(201.05865, 5286.5)(183.…
CPD-6482	methyleugenol	5766703	5721588	4821819	5670622	5101697	5688196	1940066	1404027	2132413	1	785640	775943	1301225	3988887	1282078	8327499	7505020	6679911	1808720	1806983	2084145	1593451	1239504	1404554	(179.68785, 11814.909)(180.43587, 12883.215)(181.10608, 2495.7427)(161.65738, 11895.648)(162.17401, 12348.962)(163.0947, 1115.224)(179.80037, 118321.7)(180.40753, 23140.309)(181.10721, 1481.7833)(161.2964, 18074.826)(162.59903, 3032.05)(196.395, 20066.1)(197.12921, 3668.3438)(178.42389, 7956.0986)(202.55804, 3384.4617)(204.34508, 3038.2427)(206.1006, 2164.53)(183.71281, 2437.1973)(184.5852, 146.6…
CPD-15319	4-hydroxy-4-methyl-L-glutamate	658603	555570	1	15539359	1	286871	2580700	10395380	1	1	627327	352234	13669373	13562876	1	535218	200392	1	13232529	256139	1	897444	1464764	1219236	(179.75682, 27799.883)(181.06735, 3044.08)(160.717, 2145.65)(178.52504, 8986.382)(181.2793, 2776.332)(160.52686, 24007.223)(161.05869, 24493.562)(162.0585, 9596.169)(164.06741, 10260.244)(195.63129, 26287.486)(196.59183, 9075.205)(198.43379, 7664.2563)(199.1005, 487.93)(178.0825, 25855.377)(179.22632, 9766.825)(201.67503, 1664.4325)(203.052, 14157.74)(184.47026, 3914.5784)(185.04074, 11897.98)
CONIFERYL-ALDEHYDE	coniferaldehyde	2572718	5946468	1	5843376	1411063	915951	870367	5718497	5720603	6020162	5463474	5865872	5394831	507911	615469	7353582	1670618	1280283	1944847	989594	1619504	7309249	8840542	8046135	(179.9648, 16886.422)(181.8225, 2155.3262)(160.05458, 26198.365)(161.05101, 3880.465)(162.0589, 60.77)(182.0799, 50524.688)(183.08224, 12577.149)(184.08302, 1268.46)(162.88287, 20276.295)(164.31679, 13242.361)(165.07283, 29018.7)(196.1514, 73298.76)(197.0946, 17659.322)(179.04375, 19340.863)(180.08578, 6069.12)(202.59956, 6727.8027)(204.2623, 7206.721)(205.06242, 13060.75)(184.71104, 1582.9667)
GALACTOSE	&beta;-D-galactopyranose	1	1	1	1	1	1	1	1	1	1	1	1	1	1	1	1	1	1	1	1	1	1	3972460	3387066	(180.06439, 36679.688)(181.063, 503.57)(162.05545, 6377.98)(163.0473, 183.03)(183.0787, 1989.17)(163.0581, 8467.45)(200.1032, 7695.9297)(201.60156, 9051.936)(182.59215, 11547.16)(184.0954, 21187.07)(203.05264, 1634.665)(185.04141, 70891.67)
GLC	&beta;-D-glucopyranose	1	1	1	1	1	1	1	1	1	1	1	1	1	1	1	1	1	1	1	1	1	1	3972460	3387066	(180.06439, 36679.688)(181.063, 503.57)(162.05545, 6377.98)(163.0473, 183.03)(183.0787, 1989.17)(163.0581, 8467.45)(200.1032, 7695.9297)(201.60156, 9051.936)(182.59215, 11547.16)(184.0954, 21187.07)(203.05264, 1634.665)(185.04141, 70891.67)
CPD-15374	<i>aldehydo</i>-D-glucose	1	1	1	1	1	1	1	1	1	1	1	1	1	1	1	1	1	1	1	1	1	1	3972460	3387066	(180.06439, 36679.688)(181.063, 503.57)(162.05545, 6377.98)(163.0473, 183.03)(183.0787, 1989.17)(163.0581, 8467.45)(200.1032, 7695.9297)(201.60156, 9051.936)(182.59215, 11547.16)(184.0954, 21187.07)(203.05264, 1634.665)(185.04141, 70891.67)
CPD-15382	<i>keto</i>-D-fructose	1	1	1	1	1	1	1	1	1	1	1	1	1	1	1	1	1	1	1	1	1	1	3972460	3387066	(180.06439, 36679.688)(181.063, 503.57)(162.05545, 6377.98)(163.0473, 183.03)(183.0787, 1989.17)(163.0581, 8467.45)(200.1032, 7695.9297)(201.60156, 9051.936)(182.59215, 11547.16)(184.0954, 21187.07)(203.05264, 1634.665)(185.04141, 70891.67)
MYO-INOSITOL	<I>myo</I>-inositol	1	1	1	1	1	1	1	1	1	1	1	1	1	1	1	1	1	1	1	1	1	1	3972460	3387066	(180.06439, 36679.688)(181.063, 503.57)(162.05545, 6377.98)(163.0473, 183.03)(183.0787, 1989.17)(163.0581, 8467.45)(200.1032, 7695.9297)(201.60156, 9051.936)(182.59215, 11547.16)(184.0954, 21187.07)(203.05264, 1634.665)(185.04141, 70891.67)
BETA-D-FRUCTOSE	&beta;-D-fructofuranose	1	1	1	1	1	1	1	1	1	1	1	1	1	1	1	1	1	1	1	1	1	1	3972460	3387066	(180.06439, 36679.688)(181.063, 503.57)(162.05545, 6377.98)(163.0473, 183.03)(183.0787, 1989.17)(163.0581, 8467.45)(200.1032, 7695.9297)(201.60156, 9051.936)(182.59215, 11547.16)(184.0954, 21187.07)(203.05264, 1634.665)(185.04141, 70891.67)
CPD-15590	<i>aldehydo</i>-D-galactose	1	1	1	1	1	1	1	1	1	1	1	1	1	1	1	1	1	1	1	1	1	1	3972460	3387066	(180.06439, 36679.688)(181.063, 503.57)(162.05545, 6377.98)(163.0473, 183.03)(183.0787, 1989.17)(163.0581, 8467.45)(200.1032, 7695.9297)(201.60156, 9051.936)(182.59215, 11547.16)(184.0954, 21187.07)(203.05264, 1634.665)(185.04141, 70891.67)
CPDQT-8	hamamelose	1	1	1	1	1	1	1	1	1	1	1	1	1	1	1	1	1	1	1	1	1	1	3972460	3387066	(180.06439, 36679.688)(181.063, 503.57)(162.05545, 6377.98)(163.0473, 183.03)(183.0787, 1989.17)(163.0581, 8467.45)(200.1032, 7695.9297)(201.60156, 9051.936)(182.59215, 11547.16)(184.0954, 21187.07)(203.05264, 1634.665)(185.04141, 70891.67)
CPD-12601	&beta;-D-mannopyranose	1	1	1	1	1	1	1	1	1	1	1	1	1	1	1	1	1	1	1	1	1	1	3972460	3387066	(180.06439, 36679.688)(181.063, 503.57)(162.05545, 6377.98)(163.0473, 183.03)(183.0787, 1989.17)(163.0581, 8467.45)(200.1032, 7695.9297)(201.60156, 9051.936)(182.59215, 11547.16)(184.0954, 21187.07)(203.05264, 1634.665)(185.04141, 70891.67)
ALPHA-D-GALACTOSE	&alpha;-D-galactopyranose	1	1	1	1	1	1	1	1	1	1	1	1	1	1	1	1	1	1	1	1	1	1	3972460	3387066	(180.06439, 36679.688)(181.063, 503.57)(162.05545, 6377.98)(163.0473, 183.03)(183.0787, 1989.17)(163.0581, 8467.45)(200.1032, 7695.9297)(201.60156, 9051.936)(182.59215, 11547.16)(184.0954, 21187.07)(203.05264, 1634.665)(185.04141, 70891.67)
CPD-15761	&beta;-D-altrose	1	1	1	1	1	1	1	1	1	1	1	1	1	1	1	1	1	1	1	1	1	1	3972460	3387066	(180.06439, 36679.688)(181.063, 503.57)(162.05545, 6377.98)(163.0473, 183.03)(183.0787, 1989.17)(163.0581, 8467.45)(200.1032, 7695.9297)(201.60156, 9051.936)(182.59215, 11547.16)(184.0954, 21187.07)(203.05264, 1634.665)(185.04141, 70891.67)
CPD-15762	&alpha;-D-altrose	1	1	1	1	1	1	1	1	1	1	1	1	1	1	1	1	1	1	1	1	1	1	3972460	3387066	(180.06439, 36679.688)(181.063, 503.57)(162.05545, 6377.98)(163.0473, 183.03)(183.0787, 1989.17)(163.0581, 8467.45)(200.1032, 7695.9297)(201.60156, 9051.936)(182.59215, 11547.16)(184.0954, 21187.07)(203.05264, 1634.665)(185.04141, 70891.67)
CPD-3607	L-glucose	1	1	1	1	1	1	1	1	1	1	1	1	1	1	1	1	1	1	1	1	1	1	3972460	3387066	(180.06439, 36679.688)(181.063, 503.57)(162.05545, 6377.98)(163.0473, 183.03)(183.0787, 1989.17)(163.0581, 8467.45)(200.1032, 7695.9297)(201.60156, 9051.936)(182.59215, 11547.16)(184.0954, 21187.07)(203.05264, 1634.665)(185.04141, 70891.67)
L-GALACTOSE	&beta;-L-galactopyranose	1	1	1	1	1	1	1	1	1	1	1	1	1	1	1	1	1	1	1	1	1	1	3972460	3387066	(180.06439, 36679.688)(181.063, 503.57)(162.05545, 6377.98)(163.0473, 183.03)(183.0787, 1989.17)(163.0581, 8467.45)(200.1032, 7695.9297)(201.60156, 9051.936)(182.59215, 11547.16)(184.0954, 21187.07)(203.05264, 1634.665)(185.04141, 70891.67)
CPD4FS-6	L-gulose	1	1	1	1	1	1	1	1	1	1	1	1	1	1	1	1	1	1	1	1	1	1	3972460	3387066	(180.06439, 36679.688)(181.063, 503.57)(162.05545, 6377.98)(163.0473, 183.03)(183.0787, 1989.17)(163.0581, 8467.45)(200.1032, 7695.9297)(201.60156, 9051.936)(182.59215, 11547.16)(184.0954, 21187.07)(203.05264, 1634.665)(185.04141, 70891.67)
CPD-13559	&alpha;-D-mannopyranose	1	1	1	1	1	1	1	1	1	1	1	1	1	1	1	1	1	1	1	1	1	1	3972460	3387066	(180.06439, 36679.688)(181.063, 503.57)(162.05545, 6377.98)(163.0473, 183.03)(183.0787, 1989.17)(163.0581, 8467.45)(200.1032, 7695.9297)(201.60156, 9051.936)(182.59215, 11547.16)(184.0954, 21187.07)(203.05264, 1634.665)(185.04141, 70891.67)
CPD-8059	<i>epi</i>-inositol	1	1	1	1	1	1	1	1	1	1	1	1	1	1	1	1	1	1	1	1	1	1	3972460	3387066	(180.06439, 36679.688)(181.063, 503.57)(162.05545, 6377.98)(163.0473, 183.03)(183.0787, 1989.17)(163.0581, 8467.45)(200.1032, 7695.9297)(201.60156, 9051.936)(182.59215, 11547.16)(184.0954, 21187.07)(203.05264, 1634.665)(185.04141, 70891.67)
CPD-8052	1D-<i>chiro</i>-inositol	1	1	1	1	1	1	1	1	1	1	1	1	1	1	1	1	1	1	1	1	1	1	3972460	3387066	(180.06439, 36679.688)(181.063, 503.57)(162.05545, 6377.98)(163.0473, 183.03)(183.0787, 1989.17)(163.0581, 8467.45)(200.1032, 7695.9297)(201.60156, 9051.936)(182.59215, 11547.16)(184.0954, 21187.07)(203.05264, 1634.665)(185.04141, 70891.67)
CPD-8050	<i>scyllo</i>-inositol	1	1	1	1	1	1	1	1	1	1	1	1	1	1	1	1	1	1	1	1	1	1	3972460	3387066	(180.06439, 36679.688)(181.063, 503.57)(162.05545, 6377.98)(163.0473, 183.03)(183.0787, 1989.17)(163.0581, 8467.45)(200.1032, 7695.9297)(201.60156, 9051.936)(182.59215, 11547.16)(184.0954, 21187.07)(203.05264, 1634.665)(185.04141, 70891.67)
CPD-7021	&alpha;-aminooxy-&beta;-phenylpropanoate	8295562	8548563	8405058	3868946	6608039	4192946	11663603	9976824	8941542	1	8619228	8690143	5136947	5029978	5064169	1887961	1971146	1519678	6820733	6393056	6324387	2377837	3660800	3661780	(180.06467, 221583.84)(181.06715, 25469.727)(162.19087, 5713.506)(163.0533, 151.52)(182.12856, 18360.004)(183.79475, 2830.037)(186.0824, 1670.29)(163.9812, 14399.822)(165.40054, 5153.9004)(167.32497, 6969.941)(168.07162, 9417.658)(200.45459, 3400.0928)(201.99416, 3149.3743)(202.1058, 2307.32)(181.1389, 4971.233)(183.8101, 11102.745)(184.09465, 7717.04)(203.05246, 5197.641)(204.0645, 1647.3075)(18…
CPD-12479	theophylline	8565862	8117088	1	3844984	6677811	4334877	11096505	9642305	1	8936848	1	1	5050810	4963691	1	1826250	2953357	1562431	6886502	6390339	6266241	2618926	3529165	2863095	(180.06468, 210919.34)(181.0668, 23375.408)(162.05403, 5381.44)(182.67845, 2220.034)(164.5906, 4611.991)(167.57172, 8073.1743)(168.07295, 8170.9795)(200.52608, 2405.8093)(201.77022, 5062.369)(202.1044, 2706.65)(181.77753, 14589.44)(183.59224, 7272.4707)(184.093, 6802.2266)(203.05269, 5375.609)(204.06468, 1704.294)(185.04123, 49783.793)
3-7-DIMETHYLXANTHINE	theobromine	8565862	8117088	1	3844984	6677811	4334877	11096505	9642305	1	1	1	1	5050810	4963691	1	1	2953357	1562431	1	1	1	2618926	3529165	2863095	(180.06471, 200492.56)(181.06662, 21380.562)(162.05428, 5576.4795)(183.07915, 2707.38)(164.42128, 5557.8296)(167.40492, 6404.612)(168.0738, 8128.19)(200.67668, 2693.971)(201.81743, 5902.7344)(202.103, 3105.98)(181.73647, 18483.291)(183.5367, 7429.703)(184.09256, 7275.695)(203.0527, 4889.45)(204.0643, 1618.81)(185.04123, 49783.793)
1-7-DIMETHYLXANTHINE	paraxanthine	8565862	8117088	1	3844984	6677811	4334877	11096505	9642305	1	1	1	1	5050810	4963691	1	1	2953357	1562431	1	1	1	2618926	3529165	2863095	(180.06471, 200492.56)(181.06662, 21380.562)(162.05428, 5576.4795)(183.07915, 2707.38)(164.42128, 5557.8296)(167.40492, 6404.612)(168.0738, 8128.19)(200.67668, 2693.971)(201.81743, 5902.7344)(202.103, 3105.98)(181.73647, 18483.291)(183.5367, 7429.703)(184.09256, 7275.695)(203.0527, 4889.45)(204.0643, 1618.81)(185.04123, 49783.793)
CPD-13029	<i>N</i>-hydroxy-L-phenylalanine	8295562	8548563	1	3868946	6608039	4192946	11663603	9976824	1	284733	1	1	5136947	5029978	1	1887961	1971146	1519678	6820733	6393056	6324387	2377837	3660800	3661780	(180.06473, 190008.31)(181.06717, 22015.342)(162.33249, 5094.5127)(163.0533, 151.52)(182.14507, 16529.8)(184.08044, 2282.158)(186.0824, 1670.29)(163.96254, 13503.466)(165.53862, 7019.168)(167.38258, 7346.76)(168.07162, 9417.658)(200.15962, 4314.8657)(201.67632, 6444.657)(202.10556, 8835.6)(181.15092, 5213.845)(183.76277, 11884.323)(184.09465, 7717.04)(203.05247, 5799.351)(204.0645, 1647.3075)(185…
O-PHENANTHROLINE	<i>o</i>-phenanthroline	2382408	1678434	1742026	431122	1578600	279691	2385042	931703	734738	882095	416670	2368544	2922361	3519033	3283010	4031131	1	2740947	7701482	7834568	7751689	955266	2062417	1862871	(180.06575, 28400.586)(181.06837, 3661.6147)(182.12453, 109601.164)(183.0831, 11194.996)(184.79497, 1032.4446)(185.09131, 1578.834)(199.96608, 10246.505)(201.31117, 989.8186)(203.11081, 643.82404)(204.56061, 6054.873)(205.62074, 9453.261)(207.07239, 5601.53)
CPD-18761	coniferyl alcohol radical	1280013	1236786	1214282	751638	1600219	502554	463642	1	1394523	1172351	1373690	1126104	1268386	757209	1947487	1309727	1109524	780395	1366970	1	1326234	875707	979186	843078	(180.92271, 8359.085)(181.47656, 1297.024)(162.01509, 27818.75)(163.1183, 6904.805)(163.4718, 1907.01)(181.79723, 62125.527)(182.80972, 7488.891)(184.08466, 466.745)(185.0921, 990.71497)(163.15662, 2480.53)(164.6724, 5102.576)(167.08157, 2049.64)(198.29253, 8873.977)(199.54677, 9849.745)(200.6533, 4946.1094)(201.11609, 5393.5747)(180.14563, 61481.13)(181.09799, 27898.396)(204.73357, 2073.937)(206…
CPD0-1683	phosphoenol-2-oxobutanoate	177372	162992	155779	202654	115619	400360	98551	148932	166644	119696	180578	175588	145922	148383	182322	131055	141632	142362	269446	189156	193762	103598	117096	160696	(180.99123, 4284.5796)(162.98051, 1245.5455)(163.97696, 1026.2797)(185.2768, 2700.7861)(187.00743, 761.1827)(168.33229, 2405.8801)(199.52872, 411.8125)(182.01855, 567.01746)(184.0244, 1239.87)(207.9851, 2883.115)
CPD-14005	2,4-dihydroxycinnamate	73803	1	1	103131	103339	84268	82911	1	89343	1	1	1	170049	164771	167475	80085	227098	205370	1	1	1	406348	414610	407508	(181.03798, 8018.37)(161.59973, 5633.6084)(164.03345, 2458.395)(182.44983, 6084.2026)(163.03828, 63787.082)(167.0465, 534.36)(198.69073, 9175.01)(200.21823, 1809.9929)(201.0749, 234.08)(179.84941, 11932.227)(182.81519, 1888.3425)(188.69572, 1838.69)(189.0306, 2954.31)
CPD-15127	5-deoxy-D-glucuronate	458292	180302	313618	441121	303881	384183	354263	633862	420595	504775	762380	581727	145194	314225	702715	372470	319980	266772	930491	582020	642696	677624	299168	488459	(181.04944, 4130.762)(182.0518, 4361.43)(163.0382, 41118.395)(164.04247, 3340.6887)(183.0643, 105.99)(197.49687, 12514.067)(199.00708, 14072.007)(200.08716, 886.37)(178.19267, 12540.306)(179.57948, 3251.7637)(201.038, 114.91)
CPD-2222	(R)-3-(4-hydroxyphenyl)lactate	1	5965621	6949368	846845	891301	2146311	3320311	3872586	3949344	3850312	3224821	3279646	4300129	4121911	4547818	3237789	3583893	3422862	4332053	1	4285052	4394179	3532159	1	(181.0502, 2888.427)(182.04965, 416.88)(163.03812, 59452.797)(164.04239, 5383.408)(165.05237, 138.5775)(183.9199, 3718.1157)(185.23439, 3666.2068)(186.40509, 2852.4102)(186.0689, 105.01)(166.38777, 1391.5732)(168.0554, 121.12)(199.7704, 4784.215)(201.34462, 746.1937)(181.93655, 8281.977)(183.58052, 1566.1047)(206.64572, 184.898)(189.5417, 81.869995)(190.0388, 191.01)
L-SORBOSONE	L-sorbosone	176978	514071	514302	347533	148579	302329	105266	551825	3532497	138038	161300	3558194	296536	1	1	310329	261743	235754	166506	179074	168566	193672	1	184145	(181.05318, 874.2933)(163.42728, 3839.0815)(182.5958, 3119.0813)(164.26761, 5348.984)(164.3045, 37633.895)(166.0533, 2162.07)(199.6286, 4263.583)(199.75264, 5397.553)(200.59396, 1265.25)(201.0972, 6490.58)(181.37979, 78348.58)(182.30182, 10798.951)(183.0858, 4654.33)(204.16872, 8234.131)(202.0516, 944.23)(184.02635, 2272.865)
GLC-D-LACTONE	D-glucono-1,5-lactone	176978	1	1	1	1	1	1	1	1	1	161300	1	1	1	1	1	1	1	166506	179074	168566	193672	1	184145	(181.05318, 874.2933)(164.0417, 2634.4758)(181.05959, 4832.4634)(165.05577, 4419.2085)(199.09085, 4230.348)(200.0893, 203.21)(181.22275, 3002.9758)(182.08081, 6707.3066)(183.0858, 4654.33)
L-GULONO-1-4-LACTONE	L-gulono-1,4-lactone	176978	1	1	1	1	1	1	1	1	1	161300	1	1	1	1	1	1	1	166506	179074	168566	193672	1	184145	(181.05318, 874.2933)(164.0417, 2634.4758)(181.05959, 4832.4634)(165.05577, 4419.2085)(199.09085, 4230.348)(200.0893, 203.21)(181.22275, 3002.9758)(182.08081, 6707.3066)(183.0858, 4654.33)
CPD-330	L-galactono-1,4-lactone	176978	1	1	1	1	1	1	1	1	1	161300	1	1	1	1	1	1	1	166506	179074	168566	193672	1	184145	(181.05318, 874.2933)(164.0417, 2634.4758)(181.05959, 4832.4634)(165.05577, 4419.2085)(199.09085, 4230.348)(200.0893, 203.21)(181.22275, 3002.9758)(182.08081, 6707.3066)(183.0858, 4654.33)
CPD-1242	3-keto-&beta;-D-galactose	176978	1	1	1	1	1	1	1	1	1	161300	1	1	1	1	1	1	1	166506	179074	168566	193672	1	184145	(181.05318, 874.2933)(164.0417, 2634.4758)(181.05959, 4832.4634)(165.05577, 4419.2085)(199.09085, 4230.348)(200.0893, 203.21)(181.22275, 3002.9758)(182.08081, 6707.3066)(183.0858, 4654.33)
CPD-9055	L-sorbosone 1,4-lactone	176978	1	1	1	1	1	1	1	1	1	161300	1	1	1	1	1	1	1	166506	179074	168566	193672	1	184145	(181.05318, 874.2933)(164.0417, 2634.4758)(181.05959, 4832.4634)(165.05577, 4419.2085)(199.09085, 4230.348)(200.0893, 203.21)(181.22275, 3002.9758)(182.08081, 6707.3066)(183.0858, 4654.33)
CPD-9056	L-sorbosone 2,6-lactone	176978	1	1	1	1	1	1	1	1	1	161300	1	1	1	1	1	1	1	166506	179074	168566	193672	1	184145	(181.05318, 874.2933)(164.0417, 2634.4758)(181.05959, 4832.4634)(165.05577, 4419.2085)(199.09085, 4230.348)(200.0893, 203.21)(181.22275, 3002.9758)(182.08081, 6707.3066)(183.0858, 4654.33)
TYR	L-tyrosine	15627469	13806578	1	1	14572095	12514869	1	15596813	14622964	6358035	6363911	6298075	7862157	5977256	7694011	1367652	1	1234127	8454121	8899034	1636901	5685928	7431472	1	(181.07077, 2119.304)(163.97621, 4484.828)(165.84882, 11785.321)(167.40639, 5952.72)(182.13345, 157208.4)(183.08374, 18583.031)(184.08273, 727.7114)(164.06851, 11768.031)(165.06627, 1892.4501)(199.10669, 14932.971)(200.11232, 1239.0817)(201.1069, 120.57)(183.20956, 21880.547)(205.26685, 1414.6799)(207.06953, 4796.97)(187.05922, 3150.2632)(190.56653, 1118.5175)
CPD-12749	decan-2-ol	1	1	1	1	1	1	1	1	1	1	1	1	1	1	1	1	1	1	1	85767	1	1	1	1	(181.1573, 2086.59)(163.1468, 3563.48)
CPD-15373	<i>aldehydo</i>-D-mannose	273830	199525	1	665281	707446	641086	1	893498	9363816	1	1	1	3546266	3370003	1	1	1	3692075	1	1	1	1	3972460	3387066	(181.52005, 42650.14)(181.06555, 9461.166)(163.05663, 3370.2234)(163.0473, 183.03)(183.0787, 1989.17)(165.0671, 5964.2817)(166.86734, 2094.99)(167.0687, 1452.97)(201.10495, 8679.728)(201.60289, 5348.97)(202.10625, 5553.85)(181.75685, 12490.329)(182.08887, 6675.225)(203.05196, 66606.25)(204.48613, 3428.4656)(185.03992, 23590.86)
ALPHA-GLUCOSE	&alpha;-D-glucopyranose	273830	199525	1	665281	1	641086	555977	893498	1	186500	1	1	3546266	1	5120317	5496303	4099451	1	7463151	8092400	8258543	1	3972460	3387066	(181.6907, 9289.928)(181.81528, 1307.2201)(163.39122, 3082.09)(163.0473, 183.03)(182.74562, 2481.5566)(165.35387, 5819.4272)(166.94287, 1376.9025)(167.0674, 609.15)(200.85387, 8940.544)(201.60225, 7590.0703)(202.1064, 5573.66)(181.08885, 10118.917)(182.51877, 5603.977)(203.05193, 185133.33)(204.14716, 15701.507)(205.0479, 773.35)(185.03966, 17664.688)
CPD0-1036	acivicin	3197867	1557921	2499761	2787525	1	1	2733380	2121956	2627945	2648074	2521575	2517424	2291023	1813569	2080805	3315324	2292509	2003671	2168032	1823378	2112549	1121972	516314	1340656	(182.015, 48.48)(160.00336, 1775.0038)(183.73994, 1560.6918)(184.02649, 3739.8435)(167.0177, 95.307274)(197.54527, 1408.8077)(203.05135, 31107.463)(184.49692, 7399.578)(185.0405, 17404.58)(201.73384, 3152.8044)(204.00629, 3227.1824)(207.26176, 326.04874)(208.01276, 428.32)(186.99548, 3964.3708)(188.07726, 127.60083)(189.0047, 45.32)
SORBITOL	D-sorbitol	884231	1	859928	1	1	680129	2668472	1	1	1101631	2357977	1532649	2841187	2822746	1	1	1	533689	1042853	1020194	841125	12154695	11840699	2925038	(182.08012, 70880.86)(183.082, 14941.331)(165.14287, 14185.646)(165.06831, 3700.8616)(183.59071, 3631.2085)(184.09467, 398.77335)(167.08253, 47807.207)(167.58173, 12046.324)(169.0854, 188.84)(202.55417, 6365.546)(202.9172, 4599.698)(204.1212, 1824.96)(182.67607, 2906.8572)(186.1118, 5407.5654)(205.50746, 14719.0)(208.41005, 12702.249)(210.0752, 18299.65)(187.86185, 11576.893)(189.39607, 3142.86)
LATHYRINE	lathyrine	7714643	6825072	6751041	1401432	8152087	8117386	9872056	7064335	8636081	6893271	8036290	6562608	7872542	8169780	7023190	9771478	6992008	6865892	1927055	5516777	5459507	3092800	3259590	1	(182.08093, 192353.95)(183.08316, 20677.004)(184.08089, 710.06)(164.38658, 8279.799)(165.73564, 3860.1501)(183.0906, 3921.0952)(184.0946, 737.65)(166.60579, 36484.41)(167.23483, 11906.734)(169.08525, 226.98)(201.20486, 7925.8354)(203.38496, 64059.074)(205.03078, 26761.219)(205.125, 20158.28)(183.70116, 5284.0054)(185.7495, 6077.6357)(186.11305, 6732.925)(206.87456, 19849.615)(208.07487, 6262.723)…
MANNITOL	D-mannitol	884231	1	1	1	1	1	1	1	1	1	1	1	1	1	1	1	1	1	1042853	1020194	841125	1	1	2925038	(182.0821, 207.81)(169.07924, 417.29)(184.0932, 1810.755)(167.75133, 1015.8933)(205.11934, 7421.332)(205.06998, 38383.93)(207.0774, 252.13)(187.05965, 25470.926)(188.067, 231.74)
CPD-369	L-iditol	884231	1	1	1	1	1	1	1	1	1	1	1	1	1	1	1	1	1	1042853	1020194	841125	1	1	2925038	(182.0821, 207.81)(169.07924, 417.29)(184.0932, 1810.755)(167.75133, 1015.8933)(205.11934, 7421.332)(205.06998, 38383.93)(207.0774, 252.13)(187.05965, 25470.926)(188.067, 231.74)
GALACTITOL	galactitol	884231	1	1	1	1	1	1	1	1	1	1	1	1	1	1	1	1	1	1042853	1020194	841125	1	1	2925038	(182.0821, 207.81)(169.07924, 417.29)(184.0932, 1810.755)(167.75133, 1015.8933)(205.11934, 7421.332)(205.06998, 38383.93)(207.0774, 252.13)(187.05965, 25470.926)(188.067, 231.74)
ISOMETHYLEUGENOL	isomethyleugenol	1	1	1	1	1	1	1	1	1	1	1	1	1	1	1	1	1	1	1	1	1	1	1239504	1404554	(182.10706, 38930.297)(165.1004, 48081.36)(182.11545, 10934.055)(199.1423, 6739.535)(181.13174, 27059.344)(204.59836, 4236.5)(205.0955, 11248.4)(206.1006, 2164.53)(186.0857, 5728.095)(185.0811, 144.45)(188.0911, 12450.75)
CPD-19955	butyl benzoate	1	1	1	1	1	1	1	1	1	1	1	1	1	1	1	1	1	1	1	1	1	1	1239504	1404554	(182.10706, 38930.297)(165.1004, 48081.36)(182.11545, 10934.055)(199.1423, 6739.535)(181.13174, 27059.344)(204.59836, 4236.5)(205.0955, 11248.4)(206.1006, 2164.53)(186.0857, 5728.095)(185.0811, 144.45)(188.0911, 12450.75)
CPD-13661	(S)-pyrethrolone	1	1	1	1	1	1	1	1	1	1	1	1	1	1	1	1	1	1	1	1	1	1	1239504	1404554	(182.10706, 38930.297)(165.1004, 48081.36)(182.11545, 10934.055)(199.1423, 6739.535)(181.13174, 27059.344)(204.59836, 4236.5)(205.0955, 11248.4)(206.1006, 2164.53)(186.0857, 5728.095)(185.0811, 144.45)(188.0911, 12450.75)
CPD-11530	dihydroconiferyl aldehyde	1	922742	3948739	1	841910	1382119	12939991	11090577	12485324	1	2244598	13955797	3903105	1	3856778	1052068	1032331	760444	808260	2596167	1	1	9194442	1	(182.24995, 89513.02)(183.41975, 8232.392)(184.28629, 538.40393)(185.0914, 1082.14)(163.9829, 2810.4028)(165.91264, 6700.1636)(182.66145, 55146.27)(183.59517, 10561.982)(184.0984, 9398.189)(165.99388, 1255015.2)(166.98712, 133779.08)(168.09058, 17028.8)(198.71364, 9696.628)(201.1256, 215.43)(180.27718, 111889.72)(181.10268, 24786.57)(182.1154, 1738.17)(205.76204, 2672.5454)(206.83002, 5255.927)(2…
L-PHOSPHINOTHRICIN	L-phosphinothricin	1	3865262	4399967	1	8976251	6625383	4261179	1	1	4587156	1	4811013	7440763	1	372693	5294842	787422	5109965	1741479	1	10389667	6744913	1	1	(182.30032, 3215.2512)(182.55678, 5474.5674)(185.05817, 403.15665)(164.04204, 38260.086)(164.73724, 3183.4065)(165.05186, 103.11001)(198.1431, 18994.54)(199.08011, 1024.1289)(200.0694, 3214.7)(180.26567, 53778.004)(181.06927, 1648.1199)(206.04411, 569.796)(189.03375, 108.58)
CPD0-441	fosmidomycin	234136	402562	381100	284636	235052	1	225532	267588	252453	316772	1	320078	303908	313106	292885	1	1	476502	85295	78342	1	1342969	1399795	1412381	(182.4228, 4489.248)(167.76895, 542.3775)(184.03644, 5232.3667)(167.01959, 765.855)(202.69395, 3475.9995)(204.44954, 2871.2644)(204.39723, 3807.03)(185.05388, 2778.7703)(184.0448, 1675.77)(206.34575, 1243.6633)(187.40129, 19576.402)(189.50412, 1424.6725)(188.9987, 2305.12)
CPD-11507	triketide pyrone	517536	450214	1	560490	1624935	1377706	380790	2578487	1	580992	625227	1	2048740	1673660	1591731	591356	952738	469638	478383	392689	343011	2103396	1682411	1618778	(182.46317, 21379.598)(184.34238, 5086.8423)(165.07845, 8851.248)(183.01964, 11522.721)(184.59995, 1672.4249)(167.3877, 600597.1)(166.71297, 123867.38)(168.34615, 6749.8496)(169.09544, 16235.363)(199.93301, 8067.2046)(200.97781, 4843.399)(203.13425, 2560.67)(204.1384, 1552.93)(181.87308, 12627.98)(182.61348, 9728.457)(206.38347, 8565.335)(207.4203, 5504.947)(208.29008, 4122.354)(209.09146, 4459.8…
CPD0-1555	3-methylphosphoenolpyruvate	748150	1011952	713201	751487	2219265	1924221	8458376	270106	327755	681810	1178337	596489	561089	519170	1	2180705	888413	145557	423659	298551	1964292	3856345	451931	356658	(182.48297, 13117.747)(183.98639, 211.865)(181.48889, 5837.8174)(182.98526, 2695.5)(164.54988, 2621.845)(165.98213, 1363.992)(197.35341, 34050.44)(198.00435, 5143.5073)(199.0016, 619.11664)(178.99414, 40958.26)(179.99464, 8783.385)(180.9911, 3180.295)(202.96986, 10261.766)(203.97145, 972.4251)(184.9597, 33625.08)(185.9611, 5095.3965)(186.95885, 1897.5413)
CPD-9738	2-oxo-3-carboxy-4,5-cyclopropylhex-5-enoate	227830	1	1	1	1	262531	1	1	1	1	395284	1	1	1	1	1	1	1	85295	1	1	1342969	648714	1412381	(182.52397, 4598.8047)(168.019, 242.175)(184.03638, 5165.143)(167.01959, 765.855)(201.55981, 3755.9248)(204.5669, 3374.935)(185.05362, 3085.7375)(184.0448, 1675.77)(206.01155, 911.545)(187.50098, 17910.89)(189.33923, 2874.3367)(190.50725, 1329.1001)
CPD-94	dihydroconiferyl alcohol	3296077	2376689	2849111	2219006	1	2465882	2033268	3489644	2032239	5616949	2033821	5645782	7957628	8083356	1519979	1316170	1127735	1284453	2001466	2165115	4727803	1	996673	8572549	(182.6409, 22337.492)(183.99579, 13807.456)(185.84894, 631.2875)(166.17833, 577484.06)(167.85439, 59837.22)(168.42934, 8409.356)(169.09511, 9172.354)(183.25595, 18907.936)(167.49864, 16416.559)(200.1258, 6930.275)(201.12852, 860.8167)(182.57219, 13812.341)(207.51254, 17049.033)(208.93935, 24734.066)(209.34357, 25131.717)(187.97563, 6425.6914)(189.54475, 5931.7734)(190.79381, 8672.534)
CPD-16440	iridotrial	3296077	2376689	2849111	1	1	1	1	3489644	1	5616949	1	5645782	7957628	8083356	1	1	1	1	1	1	4727803	1	996673	8572549	(182.91333, 32259.736)(183.99579, 13807.456)(185.84894, 631.2875)(166.08525, 1147746.1)(167.28876, 119166.625)(168.09488, 10585.353)(169.09511, 9172.354)(183.77339, 3981.6833)(167.49864, 16416.559)(200.12598, 10006.601)(201.1331, 1293.9099)(182.937, 4805.017)(207.36246, 27684.596)(208.82109, 25717.54)(209.09453, 17987.127)(188.71478, 5548.9604)(190.70546, 10649.769)(191.48312, 11928.35)
SELENOHOMOCYSTEINE	seleno-L-homocysteine	623362	406027	311375	600307	289964	563375	161710	726520	364326	298703	424836	1266266	399260	450335	1042395	582524	330874	431904	819147	1930090	1184606	331687	390395	338487	(182.9843, 5906.9453)(158.9729, 58260.996)(159.97386, 5337.095)(164.2378, 1113.3536)(169.9765, 2062.345)(172.9829, 848.5)(178.99426, 32979.387)(179.99257, 10436.142)(180.99133, 5105.4575)(182.9855, 5042.86)(161.9791, 9804.51)(162.9807, 847.17)(163.9782, 580.73)(199.84268, 4893.721)(201.00856, 609.48)(182.3809, 1290.5553)(191.74985, 862.84735)(192.0174, 185.85)(201.80623, 14546.586)(202.8869, 1095…
CPD-12024	Se-methyl-L-selenocysteine	623362	406027	311375	600307	289964	563375	161710	726520	364326	298703	424836	1266266	399260	450335	1042395	582524	330874	431904	819147	1930090	1184606	331687	390395	338487	(182.9843, 5906.9453)(158.9729, 58260.996)(159.97386, 5337.095)(164.2378, 1113.3536)(169.9765, 2062.345)(172.9829, 848.5)(178.99426, 32979.387)(179.99257, 10436.142)(180.99133, 5105.4575)(182.9855, 5042.86)(161.9791, 9804.51)(162.9807, 847.17)(163.9782, 580.73)(199.84268, 4893.721)(201.00856, 609.48)(182.3809, 1290.5553)(191.74985, 862.84735)(192.0174, 185.85)(201.80623, 14546.586)(202.8869, 1095…
CPD0-1272	chelidonate	2158185	1727292	1665704	1850603	1	1	2352644	1958297	1844061	1821187	1732052	1808786	1766561	1578154	1751743	2174041	1680860	1570691	1783603	1929798	1818920	1696587	1832006	1723953	(182.98546, 21384.412)(184.41724, 940.48425)(164.06804, 369.27908)(185.57458, 7427.193)(165.9822, 5525.4443)(169.9976, 73.36)(205.0294, 62.91)(187.01895, 213.95401)(207.98438, 4273.664)(208.9794, 69.23)(187.23277, 866.95044)
CPD-14076	3,6-dihydronicotine	449320	476106	871212	887287	887590	387134	1	1	1	1	1	1	1	611718	1	1	1	361940	427899	429205	1	608934	566083	590281	(183.17319, 11538.561)(184.17635, 404.46396)(191.23592, 4004.054)(189.12543, 1308.6566)(190.1212, 137.47)
CPD-9035	L-methionine-D,L-sulphoximine	9225890	313403	2140583	3452232	6998288	459697	1	1328133	1	1409133	217158	1	363993	394763	388655	1	1939072	360213	1	1	1	2831560	1872319	2140925	(183.19908, 2919.5613)(163.71431, 9530.898)(182.93985, 11036.207)(185.0643, 1962.734)(164.3266, 6814.4175)(166.05133, 6146.4434)(167.053, 342.28)(199.50267, 4622.393)(200.39566, 8246.4375)(201.42305, 2476.6277)(202.09021, 3556.8682)(182.26288, 30919.096)(183.07997, 5099.8667)(204.12033, 4483.5415)(205.55066, 251.04498)(186.81676, 2511.6836)
DIFLUOROMETHYLORNITHINE	difluoromethylornithine	100703304	87276688	89814640	127756232	145564592	119543072	88271408	69701240	70542968	62850076	12798275	16507548	12557300	12483730	11936324	189388816	159210048	159973600	91589568	88481272	93719800	16627945	11121247	12327882	(183.44319, 8078.451)(184.75653, 744.60333)(166.08553, 2338264.2)(167.08824, 220622.38)(168.09102, 21612.732)(169.09506, 13217.88)(184.7492, 5354.491)(186.30295, 926.4699)(168.09654, 3768.1433)(169.09935, 498.685)(201.9125, 12940.06)(203.50145, 30136.324)(204.13774, 3051.4714)(184.69559, 5134.652)(186.12027, 6951.9897)(206.70818, 12427.344)(208.24168, 7547.0024)(209.0934, 12103.29)(188.06934, 193…
3-CARBOXY-4-METHOXY-N-METHYL-2-PYRIDONE	3-carboxy-4-methoxy-N-methyl-2-pyridone	174032	169664	189437	134766	238963	169955	194462	188101	327496	261611	868008	1123991	749962	533046	1635409	216423	133865	98940	189049	152186	135782	916968	1	1152569	(183.71808, 6008.7227)(184.04556, 2813.008)(167.54195, 2235.61)(169.0513, 100582.65)(185.14772, 4469.735)(187.46828, 28711.553)(167.62082, 139600.64)(168.9334, 64587.55)(169.30087, 44097.28)(200.58163, 2944.048)(203.21303, 3925.9888)(204.25658, 12280.84)(204.42397, 8936.4795)(205.09065, 9965.605)(182.93875, 5361.5977)(185.32687, 2831.755)(184.072, 341.56)(207.2406, 2558.176)(209.0445, 671.91)(188…
CPD-9736	3-hydroxy-3-carboxy-4,5-cyclopropylhex-5-enoate	1517071	1	1097381	1	214789	1	493462	1	1	1	1	1686209	1	1	1	1	1	1	1	1	1	2436699	2444057	2408467	(184.03699, 2362.854)(169.03351, 100.99)(185.04073, 27953.693)(186.0449, 3704.98)(169.0436, 96.72)(202.07027, 3763.448)(203.08029, 308.135)(204.0713, 107.58)(184.18782, 165438.1)(185.56175, 124108.03)(187.0682, 191851.34)(189.0756, 17644.33)(210.20172, 424.12003)(191.0182, 1975.05)(194.0323, 469.36)
PHOSPHORYL-CHOLINE	phosphocholine	8761736	10415284	10969633	11345021	13999112	11207341	9585643	8107222	7991404	7677001	7639710	7527819	9741475	7943913	7805116	4275238	738104	12645527	1150187	1154366	10821321	11410043	7460686	1	(184.26205, 7946.0996)(185.62106, 1480.7968)(165.36855, 28714.076)(166.18376, 24780.652)(167.34026, 1507.6785)(169.0584, 511.68164)(185.2015, 10789.905)(186.91928, 6078.181)(187.24529, 1330.0133)(165.05635, 8267.143)(200.59492, 3914.331)(202.42436, 1590.0166)(202.0795, 168.0)(182.16844, 172206.95)(183.18394, 20525.773)(184.0823, 727.35)(206.59438, 828.559)(207.69188, 273.44638)(189.03853, 2184.04…
DIHYDROXY-BUTANONE-P	1-deoxy-L-glycero-tetrulose 4-phosphate	1	1	1	1	1	1	108182	120781	108333	187258	201067	188296	259437	272687	283221	1	1	1	1	1	1	300925	256435	259344	(184.3383, 1089.3022)(187.01405, 3171.0125)(164.98563, 305.30667)(186.014, 1779.285)(201.03264, 2709.045)(182.02312, 10775.129)
CPD-9737	2-hydroxy-3-carboxy-4,5-cyclopropylhex-5-enoate	1517071	276116	1097381	1020192	214789	996563	493462	1	1361560	1477385	1471380	1686209	318804	362168	680611	907884	443216	1428551	3353227	2252405	599409	2436699	2444057	2408467	(184.4131, 5255.6006)(169.0334, 140.10251)(185.04044, 17331.258)(186.0449, 3704.98)(169.03798, 432.58)(203.00934, 6766.1733)(203.08003, 267.81668)(204.0713, 107.58)(184.49779, 148319.78)(185.97475, 62412.227)(187.46698, 60016.094)(189.07295, 21304.223)(210.53618, 286.513)(212.0337, 287.57)(191.09427, 1685.4663)(194.0323, 469.36)
CPDQT-411	(<i>E</i>)-&omega;-(methylsulfanyl)pentyl-thiohydroximate	262662	1	1	388149	1	185134	910279	94520	372007	393025	182469	1	201304	181990	218358	1	267391	220510	11348	30154	416390	544469	592361	536749	(184.44228, 6235.63)(185.04051, 13424.337)(161.03587, 1929.7601)(182.38324, 1360.6666)(183.0498, 2489.385)(164.62422, 12101.563)(199.1955, 2049.8152)(200.62216, 1301.0708)(200.08, 3053.42)(201.0752, 774.01)(179.48839, 5714.975)(181.26724, 1395.803)(184.2985, 2977.1663)
CPD-6365	DIBOA	871617	737927	741373	659727	650637	603800	589452	661527	700107	22074	1	745201	671907	694454	649715	1053556	866115	761756	702444	662247	731858	703769	1	85254	(184.54085, 8506.004)(185.04051, 14796.146)(163.0174, 25394.371)(184.04527, 393.58093)(165.13225, 325.58453)(166.03441, 628.95337)(198.32913, 696.352)(203.0792, 4380.98)(185.01918, 123862.38)(205.0294, 62.91)(186.15308, 4717.606)
DIISOPROPYL-FLUOROPHOSPHATE	diisopropyl fluorophosphate	2394781	2349458	2057764	2827277	734885	2871011	2713226	2536321	2816929	3588811	3278543	3232835	6045206	5942392	1454094	2143074	2256335	2288954	2352995	2503771	2678940	1526936	5730475	6070842	(184.64355, 5941.9546)(186.23187, 797.24164)(167.39096, 13725.649)(168.06015, 326.505)(187.26945, 7511.3853)(186.99536, 1477.5524)(190.08801, 7850.44)(168.37376, 25481.428)(169.06613, 2476.8838)(172.07298, 907.2934)(203.33296, 9105.663)(204.31049, 1223.122)(206.11484, 963.39)(184.39159, 41302.086)(185.90749, 1846.9481)(209.58932, 2542.8157)(209.7332, 10569.514)(211.0704, 1751.51)(189.0442, 289.12)
N-BROMOSUCCINIMIDE	N-bromosuccinimide	160139	111566	120636	156427	164267	148968	166156	121968	121357	145485	142672	136748	170240	169277	170338	138500	104011	102849	149901	138537	163778	110345	171235	161904	(184.87677, 32314.096)(185.87402, 7352.1514)(185.96075, 5114.135)(194.97505, 3508.172)(195.97665, 499.79)(182.9745, 497.32)(200.93822, 9022.009)(202.9339, 671.06335)
G3P	3-phospho-D-glycerate	1394508	241901	1128398	78551	1001757	1241850	355329	161794	918519	1160148	1	1387056	449117	424110	456715	69661	1214208	1410023	1606819	1696888	1761826	1	345813	1352652	(184.9721, 500.63)(166.26361, 2471.307)(166.9581, 4757.813)(186.9831, 428.285)(166.55122, 2229.2727)(202.14235, 3304.7615)(204.007, 1681.9258)(205.0101, 173.09)(186.33511, 3257.0247)(187.33803, 604.5467)(207.73956, 9850.331)(210.748, 575.4956)(210.97025, 2287.875)
2-PG	2-phospho-D-glycerate	1394508	241901	1128398	78551	1001757	1241850	355329	161794	918519	1160148	1	1387056	449117	424110	456715	69661	1214208	1410023	1606819	1696888	1761826	1	345813	1352652	(184.9721, 500.63)(166.26361, 2471.307)(166.9581, 4757.813)(186.9831, 428.285)(166.55122, 2229.2727)(202.14235, 3304.7615)(204.007, 1681.9258)(205.0101, 173.09)(186.33511, 3257.0247)(187.33803, 604.5467)(207.73956, 9850.331)(210.748, 575.4956)(210.97025, 2287.875)
CPD-19477	2-[(2'-methylsulfanyl)propyl]maleate	407922	566625	399053	530304	1669603	696579	1374895	317000	383554	266705	311101	202142	238056	1	1	635872	344789	346238	1179651	538731	1159010	1	1	1	(185.5204, 305.77002)(188.62813, 1385.9453)(189.65631, 1213.5449)(190.03035, 101.11)(220.05743, 31902.037)(221.06131, 3355.08)(202.21098, 22853.72)(204.055, 10738.88)(225.01924, 178.106)(207.74605, 1191.508)
ACENAPHTHENEQUINONE	acenaphthenequinone	1	478726	377300	357824	1	369630	245287	397835	293198	390452	334984	365552	720007	922028	936718	1	582081	136118	464848	332151	414014	1369945	1291554	1452143	(185.54456, 858.635)(164.0222, 98.18)(186.77354, 3981.1814)(169.54831, 859.45)(200.06978, 15360.801)(201.07144, 3507.1353)(184.58801, 3396.3635)(185.63174, 4551.1484)(186.07567, 4797.509)(187.07323, 1771.734)(190.02617, 773.8025)
5-HYDROXYISOURATE	(<i>S</i>)-5-hydroxyisourate	112715	124672	134945	1	137149	131531	145037	411419	504320	180879	524324	507997	827908	637860	684726	191605	129431	1012497	116420	141152	461120	527895	403032	578759	(185.56633, 591.7677)(167.9053, 782.5867)(171.02443, 3335.2468)(189.0389, 715.51)(169.30783, 1445.1)(202.75224, 8928.8125)(204.33829, 11695.212)(205.06177, 8034.8438)(184.12167, 1039.4015)(207.58401, 1129.8672)
3-P-SERINE	<i>O</i>-phospho-L-serine	178232	1987987	1988057	2228391	2638924	1	1	2161328	791273	2111326	2052026	2111225	2153573	2009585	2080151	2721018	2139696	1966850	521077	2172523	1	2075885	2142895	2081669	(185.58946, 8872.936)(187.00246, 3502.7493)(165.98221, 6051.454)(185.00287, 10553.393)(187.40628, 1866.7942)(189.0074, 73.79)(167.9985, 91.69)(187.02083, 92.84333)(207.98425, 4372.382)(189.97108, 7494.426)(192.978, 161.82)
CPD-8179	2,4-dinitrophenol	2285073	2126795	1952826	306420	216905	2467624	229536	2280154	1	2078979	1841529	2094978	1	1	1871659	2408557	2162211	1618404	845572	563846	1	230666	220998	249412	(185.93, 5845.718)(187.0121, 748.12823)(168.33217, 289.55667)(187.02045, 171.37666)(171.0099, 63.41)(201.09169, 21826.426)(202.23541, 1230.2982)(183.86903, 3231.425)(192.99768, 198.33998)
CPD-14443	(2S,4S)-4-hydroxy-2,3,4,5-tetrahydrodipicolinate	1	1	7370964	1082551	1562588	1102622	692607	241733	1	1	1	198508	317756	1050203	3255762	9223153	597516	307519	130757	454677	2891531	640180	387932	763254	(186.03699, 8466.032)(168.32071, 1504.813)(187.54802, 2315.1277)(169.60727, 588.1543)(206.7747, 5211.4756)(207.08075, 3468.435)(186.93779, 21697.324)(188.73308, 5668.904)(211.67354, 670.1579)(212.0316, 942.92)(190.85674, 4832.242)(191.58916, 481.37283)
CPD0-1276	cyclogutamate	1949601	1581688	1867449	1885356	1972461	630727	1551443	905433	1552688	1353618	932276	948818	1917221	1296053	732869	1298617	741325	492626	1309220	1104132	1072821	587751	996478	1006635	(186.41022, 8959.651)(188.08109, 4075.0762)(189.41765, 3280.4268)(190.0858, 1305.58)(168.45723, 25227.97)(169.06625, 2749.5403)(188.45772, 8053.861)(189.94878, 898.3585)(192.1003, 1817.8)(169.76048, 29901.914)(171.17131, 2981.07)(172.0841, 1228.04)(207.33078, 7704.28)(208.4525, 8172.5103)(209.1274, 10712.13)(188.33228, 6983.7583)(190.92508, 5780.0884)(191.11496, 11450.34)(211.54913, 16097.318)(21…
2-AMINO-3-3-OXOPROP-2-ENYL-BUT-2-ENEDI	2-amino-3-carboxymuconate-6-semialdehyde	2949831	964077	1664862	1	106670	2719333	255979	1	140769	1648527	1914279	390614	2115696	124928	959216	2923327	2495420	1661370	2075776	2053352	467461	157445	1346225	383641	(186.42226, 340.986)(184.52716, 2559.8218)(167.01794, 249.00941)(201.82442, 12475.929)(203.3392, 25384.879)(204.39192, 4889.9546)(205.06459, 10758.979)(184.08925, 1959.4094)(185.04047, 12547.921)(207.44157, 192.96858)(187.99295, 427.50946)(188.9906, 85.69)
3-BROMOPYRUVATE	3-bromopyruvate	2085207	1963835	1630976	1147009	255777	1	482041	815493	862135	1565700	2101069	1726631	1971717	1667104	2008667	1	1502475	1793319	518980	1	1173649	516440	925850	471001	(186.9589, 1706.471)(172.95583, 1651.2213)(190.91112, 754.50995)
CPD-8991	3,5-dihydroxybiphenyl	478168	5041458	577706	6403019	314921	7919488	765893	761876	618455	985005	895233	897576	897494	1061835	1125691	370853	426988	4625203	5985012	6581788	6664371	4387576	2539659	6249862	(187.06874, 88901.17)(189.0729, 582.86)(190.0839, 1189.97)(169.32155, 11775.79)(171.06256, 1520.3453)(187.66203, 25849.193)(188.07666, 1152.0223)(189.07231, 1129.2)(170.4996, 3173.9546)(173.0729, 1310.385)(174.081, 1531.77)(205.18983, 8912.43)(207.4413, 2170.8232)(188.81294, 9062.962)(190.10449, 19818.574)(213.13812, 16730.002)(213.97452, 3899.9583)(214.0757, 1066.51)(193.55623, 2928.7886)(193.80…
CPD-12223	&beta;-fenchene	710732	1	1	1	992267	653569	1	755909	1	1	668771	1	1	1	1	1	1	1	1	1	1	1	1	1	(187.14262, 11342.685)(188.14322, 275.26602)
CPD0-1265	azelate	4120133	3585320	3874501	3723650	1	3802849	792870	956737	818080	4688319	4283049	4461893	7224796	6872157	6807188	1497008	1221663	1254313	3763002	1	3723629	4208712	1	4596025	(187.32716, 5408.9023)(188.39278, 8254.636)(189.765, 5275.5767)(169.74696, 19731.61)(171.20229, 2913.9932)(172.9256, 335.29666)(173.0938, 1300.94)(189.77058, 17932.713)(190.536, 18459.861)(172.4711, 328.21375)(173.42778, 609.82666)(174.0943, 723.43)(204.12204, 74516.96)(205.12302, 8975.961)(206.12395, 1353.7379)(186.11302, 4650.334)(187.1072, 736.41)(211.85182, 84892.14)(213.04195, 12994.241)(213…
CPD-9779	4-(1-methyl-2-pyrrolidinyl)-3-oxobutanoate	5487386	6392888	1	7859399	8716540	7015808	5392180	5040296	1	1	5153272	5195284	1622085	910101	2472717	12067906	10278878	16983820	5729936	5649974	5270116	1332028	1314789	1251039	(187.4158, 1540.87)(189.1109, 445.84)(168.22192, 5947.9336)(169.95615, 1578.8372)(171.10657, 6367.78)(188.41487, 21347.1)(189.12213, 84812.85)(190.1224, 11709.48)(169.27045, 20669.533)(170.90916, 4940.208)(173.11499, 467.005)(203.13782, 167536.78)(204.13939, 17273.47)(205.1319, 6343.9917)(185.12648, 2219.7686)(208.14183, 17663.605)(209.59648, 5168.2676)(190.41745, 8118.729)(192.42363, 10187.627)
ALPHA-NAPHTHALENEACETAMIDE	&alpha;-naphthaleneacetamide	209556	215721	212654	549393	533328	467663	337539	260897	271176	1	3868462	248886	2505660	2594077	406705	309297	1	3796481	334543	300335	301025	324467	328444	839006	(187.4733, 6057.092)(187.59085, 2938.6)(189.0915, 1584.54)(169.0257, 20193.525)(170.85318, 1102.0592)(170.079, 14920.05)(188.22171, 9158.925)(188.59584, 5552.8003)(190.1056, 33648.96)(170.22063, 1023.8186)(170.08826, 1341.4471)(172.0939, 5109.905)(173.0923, 323.67)(205.17647, 53736.11)(205.29008, 10940.427)(187.25166, 17749.457)(188.5611, 2442.2021)(189.1236, 5815.11)(211.12831, 22647.748)(212.91…
CPD-628	3-oxalomalate	1093818	1882526	1118937	2067530	1476337	1096747	1364747	1988935	1898311	1970028	940823	932470	948699	920087	999951	997030	703178	749217	1793308	2046737	1834765	712382	584393	605740	(187.47855, 258.15)(189.7377, 992.8025)(222.4692, 5659.3564)(223.65138, 2264.3413)(224.75313, 338.48453)(225.03046, 1069.205)(203.00475, 4976.5356)(204.00668, 473.3986)(230.98952, 26511.637)(209.5988, 2831.057)(211.47182, 685.3775)
OXALO-SUCCINATE	oxalosuccinate	2337233	1855451	1798896	1657356	1	667419	1	1422947	1547765	1722890	1769186	1586458	1697529	1758887	1653517	2315549	1798476	1967178	1808736	1713197	1844995	1611103	1464520	1	(187.9928, 206.04239)(188.9906, 58.42)(171.98242, 66.293335)(169.98808, 14520.221)(170.99194, 1135.0022)(187.6092, 1602.2098)(192.019, 60.0)(211.97725, 112.06666)(194.8631, 654.275)(195.97661, 311.67667)
INDOLE-PROPIONATE	3-(1H-indol-3-yl)propanoate	28958080	26755084	27996592	5901838	48069716	39996168	19924724	16332519	14995632	13589434	12339043	14435408	1750519	1562440	1837657	71884688	68923448	66882556	4199114	28423208	25972868	4319224	4593535	4534477	(188.06976, 703716.75)(189.07275, 89204.1)(190.07089, 188.47)(170.05946, 42877.594)(171.0636, 5672.8145)(172.07365, 229.98)(190.4169, 20863.496)(191.08101, 8021.0703)(171.0708, 218.06)(172.0733, 664.02)(207.89964, 30059.857)(209.49918, 56488.344)(211.11311, 13430.195)(189.2674, 3269.181)(191.1784, 2437.756)(191.9756, 6414.284)(192.1, 7182.6)(212.56812, 1603.4767)(195.37779, 5588.7305)
IODOACETAMIDE	iodoacetamide	609140	522409	492147	607392	474107	500374	306985	334722	352065	494503	506646	524333	637513	644937	596111	583606	472191	517102	720015	652842	701396	505807	511562	504903	(188.93904, 597.70996)(202.96997, 10188.307)(203.97157, 1153.0564)(184.9599, 32247.482)(185.96112, 4828.888)(190.91107, 1112.7222)
CPD-13914	cyclic-2,3-<i>O</i>-oxalyl-L-threonate	1787683	1352996	1377322	1	879341	1	1	1	1175310	1391606	1295814	1317808	1	1	1	1	1329541	1271974	1296257	1258402	1299002	1231549	1172236	1145751	(189.00604, 77.68833)(170.99217, 1155.5881)(190.95204, 3864.764)(172.00493, 7934.0176)(173.0118, 73.36)(189.02992, 6939.5522)(190.02959, 234.33086)(213.0017, 2908.5957)(217.0035, 64.23)(194.9799, 76.97)(198.9997, 75.15)
CIT	citrate	1787683	1352996	1377322	1	879341	1	1	1	1175310	1391606	1295814	1317808	1	1	1	1	1329541	1271974	1296257	1258402	1299002	1231549	1172236	1145751	(189.00604, 77.68833)(170.99217, 1155.5881)(190.95204, 3864.764)(172.00493, 7934.0176)(173.0118, 73.36)(189.02992, 6939.5522)(190.02959, 234.33086)(213.0017, 2908.5957)(217.0035, 64.23)(194.9799, 76.97)(198.9997, 75.15)
threo-ds-iso-citrate	D-isocitrate	1787683	1352996	1377322	59383524	879341	1	3284791	55908844	1175310	1391606	1295814	1317808	1	383899	49632356	1	1329541	1271974	1296257	1258402	1299002	1231549	1172236	1145751	(189.00604, 77.68833)(171.9506, 111587.93)(176.02022, 35758.61)(177.02748, 6979.133)(190.95204, 3864.764)(172.00493, 7934.0176)(173.0118, 73.36)(214.82166, 2035.5875)(190.13138, 5609.6826)(190.02959, 234.33086)(213.48132, 5919.0537)(216.51239, 944.845)(217.0143, 1341.19)(197.33598, 55874.86)(198.20381, 7909.2695)(199.00156, 631.6825)
KYNURENATE	kynurenate	909778	1190370	1	354622	809643	388716	821789	225116	1	849352	1145103	936200	2289211	2248644	2344893	167121	955953	227463	1	184772	435818	1017610	1331032	1151927	(189.0299, 7575.0073)(190.02959, 433.28253)(191.031, 147.07)(170.0197, 520.18)(193.0482, 467.16504)(172.74721, 6605.087)(173.03445, 164.68)(205.92131, 23281.223)(210.07274, 562.9733)(192.06573, 26405.596)(212.68935, 617.3417)
CPD-11578	3-(indol-3-yl)acrylate	875465	4061876	1	276752	1	6509462	1149466	489438	4402010	822763	4964504	1006878	1	1018206	1315500	1	1001701	1	5083321	5344859	5649024	1364088	1	1141951	(189.06628, 1394.55)(189.0659, 2361.28)(169.59523, 1993.421)(172.45358, 1030.696)(172.0594, 690.0)(173.0562, 1657.37)(187.19766, 63801.89)(188.47446, 12486.37)(190.0741, 2444.5)(191.0778, 2326.77)(169.05118, 54167.82)(206.69333, 6359.7114)(208.90129, 1731.6318)(186.7432, 28347.637)(188.48357, 1599.604)(195.61864, 1620.4401)(196.0473, 1429.62)
CPD-13910	cyclic- 3,4-<i>O</i>-oxalyl-L-threonate	1787683	1352996	1377322	347648	879341	368904	206235	154448	1175310	1391606	1295814	1317808	223527	217534	230296	504813	1329541	1271974	1296257	1258402	1299002	1231549	1172236	1145751	(189.31363, 3962.8684)(171.28731, 1676.8153)(190.76382, 4238.0913)(172.83131, 7100.4775)(175.26027, 4261.6323)(212.0479, 213.08499)(189.20691, 6552.977)(190.02959, 234.33086)(213.0017, 2908.5957)(217.0035, 64.23)(196.98605, 739.69)(198.9997, 75.15)
CPD-10546	methyl (indol-3-yl)acetate	3422605	384517	215207	878137	5666442	865019	2773993	2412807	1599918	225641	458384	1	5720531	5781157	997450	307838	1	1829937	1	2934624	243479	844628	2820106	9634962	(189.70465, 30372.47)(191.97337, 19477.467)(193.08876, 28165.135)(171.30096, 2655.123)(172.57483, 1079.8151)(174.0751, 2792.53)(191.25356, 1476.7767)(193.0954, 16565.71)(194.10034, 5766.315)(195.0953, 59.24)(173.4124, 3788.3733)(174.33112, 1872.69)(174.0657, 105.09)(208.6425, 16750.518)(209.71481, 4378.046)(209.1122, 120.72)(190.43808, 9414.367)(190.60526, 1791.8726)(194.1144, 8895.05)(214.075, 8…
CPD0-1398	methylglyoxalbis(guanylhydrazone)	2249757	1248778	1028711	1	2317933	1940921	2923236	2794870	2759034	2991158	2910006	2916302	3822959	3651665	3760931	2521547	2014508	1	1912779	2018195	1943303	1	1	1	(189.75479, 2228.6123)(187.14275, 6241.455)(188.14342, 123.86706)(207.1661, 445.09)(209.12697, 17097.807)(210.12683, 794.76)(211.1232, 645.83)
8-AMINO-7-OXONONANOATE	8-amino-7-oxononanoate	1	625319	550945	1	1254908	886311	776878	774457	5571948	6728616	834787	7072158	487228	3883287	3460136	668177	396692	683699	673377	623474	653345	4406750	2331475	2375141	(189.99052, 7454.549)(189.12234, 2836.8398)(172.19327, 6026.532)(173.26094, 10934.472)(193.1396, 144.87)(173.12953, 3299.9763)(209.16293, 29068.725)(188.8149, 5706.801)(210.11043, 72157.26)(211.45108, 2118.3396)(212.1262, 201.28)(192.4648, 14694.51)(197.11514, 3592.33)
ACETYL-GLU	<i>N</i>-acetyl-L-glutamate	925367	1259859	1	185522	1	1147712	598805	698529	531774	682575	804753	693238	967562	1	1	284914	266000	293834	262066	308843	1220471	308823	297840	204700	(190.0498, 237.53)(189.9844, 720.97766)(192.06647, 677.571)(175.05402, 272.77167)(205.97969, 13696.099)(206.39088, 2753.25)(208.34262, 11837.545)(209.09024, 18827.605)(210.0893, 4461.295)(187.72212, 9727.391)(188.76855, 2958.1233)(189.57185, 1713.535)(213.04073, 578.942)
CPD-19476	2-[(2'-methylsulfanyl)ethyl]maleate	1	1	1	1	380902	537534	1	1	1	1	1	1	123394	137384	400472	484552	379138	172848	1	1	1	304434	304922	288193	(190.29898, 3862.3696)(191.01752, 1184.2849)(192.0164, 46.14)(172.75175, 5861.0576)(173.88889, 5759.9575)(175.34517, 8723.09)(176.0098, 4316.35)(206.6491, 6085.9404)(190.53682, 773.49493)(192.0387, 326.32)(215.25848, 815.77496)(216.0114, 60.99)(192.99734, 5199.2427)
DEHYDROQUINATE	3-dehydroquinate	161417	101595	1196398	144953	272807	259619	392643	110626	554051	1406971	1182587	1201816	2011010	2133339	2433798	351893	570688	285622	550160	203721	254145	468030	1040681	968250	(190.34244, 1792.2039)(190.0407, 168.21)(171.57883, 12749.087)(173.36627, 1552.1383)(192.72212, 772.8467)(193.0511, 4762.2)(195.0617, 346.94)(208.99565, 5556.963)(211.54189, 24751.205)(212.0911, 30293.59)(191.52406, 11741.843)(193.47658, 9135.54)(213.02963, 1731.0775)(217.0459, 143.73)
CPDQT-429	indolylmethylisothiocyanate	1	310445	1	183475	428458	367852	674298	1	1	1	1	165687	501587	480919	833381	1	1	1	226144	395071	1	2774611	1	471928	(190.35133, 1505.6539)(193.0501, 16856.68)(194.05275, 1156.0701)(208.61559, 10760.038)(210.07495, 8913.788)(211.0774, 1539.0149)(215.03165, 3141.505)
CPD-9827	ayapin	290863	267825	274563	1	1	1	1	1	1	1	1	1	86867	1	89302	140436	105036	166338	1	1	120372	85821	105134	426278	(190.53, 3368.7551)(173.52063, 585.73)(176.82784, 8110.2627)(177.0321, 7396.16)(195.04483, 1520.754)(176.0313, 5137.25)(210.4851, 12094.726)(191.55508, 3459.809)(193.05695, 532.815)(213.0175, 3284.8782)(197.7348, 6202.9927)(199.0113, 2260.72)
CPD-12386	1-(1<i>H</i>-indol-3-yl)-2-<i>aci</i>-nitroethane	352293	1	662911	529995	1	604517	408595	1	535242	444931	335540	599210	1	812431	1	806381	798321	410436	769627	487280	1	306059	465079	1	(190.5473, 11274.51)(194.08142, 19899.957)(194.88512, 10806.768)(175.34358, 4038.4016)(175.57213, 6068.29)(176.0695, 172.98)(191.30072, 3261.61)(195.0949, 3473.04)(175.4098, 6081.705)(177.2242, 7300.3516)(178.0816, 6902.04)(209.75793, 101651.805)(210.84544, 20131.305)(212.65965, 8880.667)(213.12039, 18666.578)(191.51233, 3939.4058)(193.90683, 6150.842)(195.1107, 7146.35)(216.80789, 9408.183)(217.…
10-HYDROXYDECANOATE	10-hydroxydecanoate	228962	656590	662205	314376	1	244252	839690	844270	152659	293914	509232	803212	720121	507264	381059	1	136090	105565	278802	96400	95030	882476	910393	709925	(190.58546, 11473.921)(192.14357, 2018.3243)(172.31908, 5744.249)(172.53117, 4867.0)(191.64784, 10691.405)(174.77121, 2189.4155)(175.14653, 10590.603)(205.16814, 6222.8535)(188.16309, 4213.8965)(189.1671, 370.66)(211.35292, 2058.9502)(213.23013, 8637.105)(214.91545, 10495.586)(194.07071, 28634.68)(196.49298, 11485.762)(196.52676, 6621.5547)
PHYTOALEXIN-CMPD	psoralen	1321998	1221474	1163165	1615550	2267524	1648227	1639096	1525908	1508797	448550	412341	1	438472	1	1036679	1369123	1327691	1235410	1390738	1398222	1394822	887583	877491	674796	(190.6446, 725.636)(171.02742, 5448.468)(172.0332, 141.32)(190.04971, 383.71198)(204.06308, 41780.953)(205.06746, 9236.271)(206.07889, 572.7425)(188.17487, 3298.4717)(189.46811, 5660.458)(213.03336, 1282.345)
CPD-4461	plumbagin	23321216	21621284	22935920	4616133	43404120	36592924	19151858	16505887	15388070	14237510	13026819	14937307	12568682	10584760	12969909	56375744	55091312	53361392	21851598	22552834	20873504	2908227	5997050	5066537	(190.80205, 516.22253)(174.38318, 408.97998)(191.9824, 10626.482)(193.06424, 1216.8151)(173.8042, 937.915)(174.5533, 3081.485)(175.0591, 809.33)(206.49884, 27768.117)(207.22214, 7080.1963)(188.06987, 759225.0)(189.07277, 99863.2)(190.07544, 24257.947)(214.04684, 550.145)(214.0485, 300.24)(195.0282, 238.96)(196.036, 1867.34)(198.0432, 10726.7)
HOMOARGININE	L-homoarginine	6470515	1263311	5544937	1088237	3922859	1253145	1734419	1828467	1791067	3335034	2953081	2885395	2048064	2110550	1977839	540530	460011	1	5659378	1298263	1241154	3523795	4619229	832418	(191.1413, 648.29004)(173.1306, 5903.749)(191.14194, 13322.963)(192.1457, 234.57)(173.13118, 7058.0493)(207.1727, 18616.49)(208.17609, 1696.0)(189.1617, 197.87)(212.77034, 884.72284)(194.11642, 96127.55)(195.11774, 11020.372)(196.12639, 561.62225)
N-METHYLARGININE	L-<i>N</i><sup>6</sup>-methyl-L-arginine	1	1263311	1	1088237	3922859	1253145	1734419	1828467	1791067	3335034	2953081	2885395	1	1	1977839	1	1	1	1	1298263	1241154	3523795	4619229	832418	(191.14163, 566.76373)(173.13042, 7360.155)(173.13118, 7621.979)(213.41406, 789.6329)(194.11638, 74780.2)(195.11787, 7695.8833)(196.12741, 596.44257)
CPDQT-350	(<i>E</i>)-8-(methylsulfanyl)octanal oxime	1054754	1088652	947235	2600662	5237641	1279135	1	1479379	1682575	872274	1	1	1	792330	608675	1178398	2420902	2405542	984217	921110	799245	1	365958	753982	(191.16948, 4890.2124)(192.36758, 977.14746)(194.11575, 6388.295)(171.29768, 3065.539)(174.1101, 5320.08)(190.97461, 5606.5386)(173.05919, 14117.665)(174.05351, 2998.889)(174.9502, 4367.9614)(209.15141, 12919.047)(210.15431, 1365.0054)(190.98764, 20101.203)(192.1428, 2942.6365)(214.05244, 5019.879)(214.8691, 6034.8115)(215.7297, 3591.1536)(216.67976, 1397.7328)(217.10901, 378.775)(195.72649, 3580…
2-OXINDOLE-3-ACETIC-ACID	2-oxoindole-3-acetate	212633	217472	652332	133787	618435	168678	1944285	316016	1399244	267756	376696	648710	238876	984044	114981	110169	150712	118773	135970	305187	495823	246815	571282	383462	(191.38545, 1171.66)(175.04828, 638.545)(177.0574, 507.96)(192.39963, 16048.449)(193.73592, 4046.6868)(175.59373, 4078.9675)(177.05862, 1198.746)(209.63054, 33919.27)(211.28264, 29960.086)(211.75923, 10032.973)(212.09267, 8963.853)(213.0911, 3871.53)(191.30527, 5150.1416)(193.61269, 10683.315)(194.33185, 6572.996)(213.84436, 3067.2961)(215.04985, 4181.92)(217.04684, 879.535)(196.03635, 134.26999)…
CPDQT-28	7-(methylsulfanyl)-2-oxoheptanoate	423854	323117	281862	4431294	726085	845876	554789	1996674	361923	332672	289765	368372	289068	1195399	357043	254723	193355	253615	338247	374438	403939	388025	284472	450569	(191.4566, 1810.9229)(193.0601, 368.51)(172.38396, 10130.103)(191.84398, 21785.744)(193.06683, 1195.8334)(173.10626, 2842.2415)(174.19637, 482.28143)(175.05742, 544.02997)(208.51082, 18033.834)(209.47371, 7619.8354)(211.9804, 72418.6)(212.09116, 54887.4)(190.08463, 8388.737)(191.37387, 21976.816)(193.0849, 7418.19)(194.0804, 386353.6)(215.28027, 1223.6661)(217.0504, 533.48334)(196.70444, 627.9913…
CPD-14609	castanospermine	2088091	570159	2155791	2020177	2762768	1851360	681866	3053823	676863	2799085	2950085	2894987	1131091	1235961	1244179	2282593	1600597	1616722	2113440	2470888	2227259	1160011	1144866	1	(191.45735, 22926.03)(193.17072, 6731.4966)(194.367, 11756.467)(195.1151, 314.84)(175.26974, 7310.9966)(176.4414, 917.7166)(194.45923, 4572.8276)(175.23746, 2174.7224)(176.36272, 694.695)(178.1211, 1684.93)(210.20073, 3803.8594)(209.13751, 860.215)(210.1315, 109.86)(191.30017, 1514.8334)(213.96161, 4622.516)(216.10335, 2890.55)(216.70576, 3435.5762)(196.03464, 14831.293)(198.59541, 9222.013)(200.…
MESO-DIAMINOPIMELATE	<i>meso</i>-diaminopimelate	1	1	2067655	1	1810075	1	2979497	1	3202237	1	3516905	3845575	1	1	1	1	1	600180	1	1	1	1	649740	850301	(191.47365, 737.9437)(192.76823, 2890.1902)(195.10579, 1037.4125)(174.8652, 15945.915)(175.087, 15973.27)(191.1051, 1193.678)(208.13202, 97243.61)(209.13263, 12509.199)(210.137, 651.6925)(193.12024, 2808.9402)(214.25586, 1445.995)(215.09059, 409.2867)(199.0857, 1410.53)
LL-DIAMINOPIMELATE	L,L-diaminopimelate	1	1	2067655	1559209	1810075	1392094	2979497	879901	3202237	1	3516905	3845575	1	1645630	1416081	1165797	1206500	600180	1353532	1877430	1406856	1	649740	850301	(191.59909, 2282.904)(192.76823, 2890.1902)(195.10579, 1037.4125)(174.54156, 13377.017)(176.0939, 12719.869)(191.24728, 3257.4707)(192.50336, 1763.2722)(173.09436, 5188.998)(174.0969, 853.742)(209.13258, 50385.55)(209.93492, 9849.768)(210.71057, 3081.4973)(212.1423, 603.51)(192.72014, 1037.4829)(213.77287, 6329.7456)(215.8416, 2694.795)(217.5961, 56235.05)(218.0972, 19446.73)(198.53706, 12040.609…
CPDQT-404	L-trihomomethionine	1	1	2304691	3471022	1774976	1592083	1233206	1	1	1	2291200	2727481	5019255	2106388	3476094	1	1686438	1338060	1	1	1036850	658325	5668729	2572375	(191.79248, 7251.723)(194.66597, 20212.576)(194.7652, 11842.933)(196.0968, 161366.39)(174.08702, 3009.5208)(175.83545, 12197.926)(178.08423, 41738.91)(192.10086, 10621.596)(193.09344, 481.77)(174.37935, 991.9957)(177.0977, 109.27)(209.12827, 28254.104)(210.12685, 2832.48)(211.12341, 529.074)(191.80399, 5812.7524)(194.1155, 7781.38)(214.21086, 8874.122)(215.76262, 1675.7666)(218.088, 6066.7)(198.0…
CPD-13518	N<sup>&omega;</sup>-hydroxy-L-arginine	3019056	1	1	1333107	1	3013627	3964950	1357622	1	2846277	6045971	1	5057444	1841471	7321020	1	3474261	2849813	2219533	2958310	1	1533911	11263777	2839419	(191.82077, 7250.5264)(192.11829, 334.72498)(173.64963, 2797.6155)(174.09955, 113.18251)(196.51465, 11378.631)(174.73857, 5822.6523)(177.71506, 17160.049)(179.1177, 30139.21)(210.69217, 14203.451)(210.15451, 1793.4299)(192.52736, 22086.799)(192.47594, 3466.21)(214.10411, 7561.8647)(215.1137, 275.72)(196.09416, 65235.434)(197.09648, 18491.111)
CPD-12398	1-(methylsulfanyl)-7-<i>aci</i>-nitroheptane	1	1	2304691	3471022	1774976	1592083	1233206	1693722	1	1	2291200	2727481	5019255	2106388	3476094	2937127	1686438	1338060	1118067	1260572	1036850	658325	5668729	2572375	(191.86476, 8172.807)(194.09491, 21930.031)(194.43217, 10985.996)(196.0968, 161366.39)(174.0374, 2983.8875)(175.78511, 10525.947)(177.68501, 34038.555)(192.10086, 10621.596)(193.09344, 481.77)(174.76022, 1399.6211)(177.0977, 109.27)(209.12796, 25274.186)(210.12685, 2832.48)(211.12341, 529.074)(192.2663, 6346.2964)(194.1155, 7781.38)(214.38599, 9156.565)(216.69116, 10457.722)(218.088, 6066.7)(198.…
CHLOROACETOL-PHOSPHATE	chloroacetol-phosphate	5936299	4916174	3918337	4921416	6697623	5478084	13187569	4666767	4586479	5731247	6050997	5824645	2767213	2477386	2813482	5043743	2820291	3718014	4116455	4611757	4353422	2754187	2701874	2729348	(191.981, 1792.9984)(210.93932, 253961.83)(211.94249, 11415.813)(212.93779, 39300.31)(214.9379, 153.4)
L-ALPHA-AMINO-EPSILON-KETO-PIMELATE	L-&alpha;-amino-&epsilon;-keto-pimelate	698467	411987	402987	722800	1450607	843670	601615	853989	199268	2142546	1183020	1250288	3020739	1709535	3413660	2140838	1074780	1	416452	231350	599893	1	1	2014664	(192.00693, 38723.812)(193.06622, 3419.1985)(170.58217, 14691.857)(189.38309, 5222.714)(191.5686, 1522.0701)(192.0668, 68.13)(173.11, 4693.828)(175.4291, 2307.477)(176.0695, 8768.89)(208.00003, 20899.854)(208.99828, 8868.552)(210.65039, 19418.393)(190.08429, 15060.4795)(191.74916, 17245.123)(215.15146, 1181.529)(197.5438, 7406.747)(198.0433, 11623.29)
PENTAHYDROXYCYCLOHEXANONE	2D-5-<i>O</i>-methyl-2,3,5/4,6-pentahydroxycyclohexanone	2694619	843452	1	1692175	727223	1271246	2043319	2489091	2942760	3054149	2181286	2455648	1010837	895650	1	690231	308907	570967	2615223	2874050	1	1365185	715993	620429	(192.06563, 30967.57)(193.0664, 2460.173)(174.05397, 1890.5741)(175.0547, 79.19)(195.0758, 3908.71)(176.34998, 10051.009)(177.0692, 9977.47)(212.86754, 9229.864)(213.88531, 5007.3867)(214.60515, 4581.8477)(194.14117, 70779.836)(196.31851, 27360.791)(196.69511, 10879.68)(215.1949, 2190.2441)(198.35126, 6635.8896)(199.94957, 1155.194)(201.0494, 666.62)
CPD-14047	<i>N</i>-hydroxy-L-dihomomethionine	2237185	2273344	2356821	6318360	1216929	2752901	8964721	2673638	2490779	2020480	1647805	3996672	3916365	3061692	3892373	1723056	1	1	5671844	3400786	2543449	2240907	1824958	1998969	(192.06586, 16305.968)(193.06184, 728.50995)(174.05592, 2905.4692)(175.0526, 281.32)(194.08168, 88933.555)(195.42902, 10033.26)(198.0764, 19250.316)(176.25104, 8356.398)(178.20985, 33858.438)(180.06505, 44675.582)(212.91383, 6698.376)(214.60567, 1705.3899)(214.85341, 1643.865)(194.33153, 10629.205)(196.94827, 4633.3257)(197.09024, 2772.05)(218.64894, 17353.16)(220.06187, 2109.5552)(200.1464, 530.…
CPD-18130	arabidopate	1518125	1320507	1430313	1581457	2301179	1643853	2461693	1925918	1877081	1568468	1527723	1532366	1632830	1652367	1639186	1831650	1566001	1508266	1682211	1768460	1755901	2746279	2696022	2756829	(192.43799, 719.36)(193.99646, 352.13)(213.02281, 442.6486)(193.00348, 852.1075)(229.82773, 434.57574)(212.08804, 1282.104)(230.98918, 50865.637)(232.29163, 2467.195)(232.98853, 2700.2627)
CPD-18135	<i>iso</i>-arabidopate	1518125	1320507	1430313	1581457	2301179	1643853	2461693	1925918	1877081	1568468	1527723	1532366	1632830	1652367	1639186	1831650	1566001	1508266	1682211	1768460	1755901	2746279	2696022	2756829	(192.43799, 719.36)(193.99646, 352.13)(213.02281, 442.6486)(193.00348, 852.1075)(229.82773, 434.57574)(212.08804, 1282.104)(230.98918, 50865.637)(232.29163, 2467.195)(232.98853, 2700.2627)
CPD-13604	homoisoalliin	270235	207389	195411	259518	260629	239455	393313	3896411	432549	455040	482247	458947	1	1068240	1965680	2623574	1318237	146013	1	332880	360220	4561859	3219625	4222577	(192.56125, 14169.047)(194.46019, 2896.6763)(196.06131, 9080.859)(173.21759, 621.60004)(192.0695, 16376.875)(174.5971, 1986.5592)(176.61284, 495.91888)(178.30962, 402.3125)(209.73021, 6084.7427)(211.34938, 5235.0576)(213.09163, 7434.3843)(214.0915, 970.9)(192.6162, 8312.006)(194.0825, 6351.82)(215.04935, 1005.56494)(199.3602, 5456.999)(200.89879, 6166.5366)(201.0457, 20055.67)
CPD-334	2,3-dioxo-L-gulonate	639501	252797	309763	246502	271358	246538	299060	266481	432881	90636	215345	322683	319440	312525	311826	748656	258747	355068	240025	250779	215504	476529	934268	201029	(192.68695, 2896.0378)(194.3132, 1202.8285)(174.65128, 38502.176)(195.0286, 242.14)(175.01723, 220127.36)(176.16362, 20276.572)(177.24768, 5114.344)(179.0332, 1742.99)(214.0709, 11889.31)(193.24794, 520.296)(194.05243, 137.71)(195.05273, 64.69334)(215.01646, 5467.417)(216.89056, 4731.4375)(217.5185, 17373.008)(219.02611, 47080.05)(196.70007, 4926.276)(199.0038, 61.3)(201.0155, 4201.48)
CPD0-1471	6-formylpterin	1	2343277	2231232	273735	240989	287378	265886	252957	239604	220654	512469	999202	1091712	1122862	1072598	1	411402	259649	2206354	2231836	2200680	909789	1008530	1050975	(193.0513, 431.41)(178.0456, 83.57)(193.6785, 512.0725)(195.63158, 2208.4788)(209.90013, 17879.186)(211.81157, 1519.4519)(191.25226, 8459.929)(192.06966, 1035.0865)(193.08606, 123.880005)(216.54056, 480.005)
CPD-7204	&beta;-ionone	1543283	1224679	1541497	1683845	1	499616	1	580501	462405	623063	1	462820	627636	2915741	1958552	2207755	1920140	1125112	915770	1526247	1556531	498044	546305	485025	(193.15726, 1294.895)(174.14484, 1021.39996)(197.17422, 383.9243)(175.14694, 9712.049)(176.14981, 480.13998)(192.17303, 3952.4167)(215.13542, 9609.723)(197.12631, 13164.222)(198.1309, 904.4749)
CPD-12215	coumaryl acetate	1	5605011	5427463	6623824	8448928	8118339	3078909	3817809	5411239	6573505	1	5470323	2702755	3693253	4066929	4518157	4522945	4148066	5065924	1	4917533	1	3816604	1680227	(193.80383, 14059.91)(196.2556, 26121.074)(196.68948, 10627.9)(196.0938, 19123.34)(175.26726, 9141.727)(193.36269, 11925.646)(197.0932, 2115.2)(178.08286, 15129.394)(179.0865, 3117.85)(210.11165, 155396.16)(211.11246, 23582.66)(212.1255, 2429.1184)(192.10017, 10692.932)(218.13004, 14285.953)(219.07625, 2021.3545)(199.43095, 4090.3643)(200.26828, 2037.0796)(202.07137, 438.93665)
1-3-7-TRIMETHYLXANTHINE	caffeine	17719792	1	17193164	10144323	15668260	10708794	26008720	23372410	24269076	21655856	21748428	23433262	22090626	22978480	22169360	6211362	6096321	5191747	14798574	15282380	14893434	25891514	25204116	25661916	(194.0803, 536089.5)(195.0841, 63863.336)(176.19992, 6787.6323)(178.0783, 393.25)(179.0783, 179.18)(178.08286, 9833.957)(179.0791, 4529.6377)(180.58617, 215.33002)(181.089, 195.22)(213.2496, 7019.478)(215.89194, 3285.6858)(216.11917, 3560.7898)(196.37115, 1751.2139)(197.81621, 3656.4602)(198.11058, 4018.9114)(199.1152, 188.32)(218.12122, 3329.561)(222.07527, 414.48666)(202.34227, 1598.6558)(204.0…
CPD-8063	1-<i>O</i>-methyl-<i>scyllo</i>-inositol	1	15823836	1	16097752	13950165	14727897	8529930	1	1	1	1	1	1	9104121	7024411	15149854	1	12675439	10394318	1	10312511	4792323	5624746	6260475	(194.08041, 57896.605)(195.084, 55562.0)(176.99776, 161842.95)(178.0716, 14068.723)(180.078, 64.015)(179.00519, 18508.7)(179.75122, 802.18335)(215.90701, 13221.773)(216.1198, 4174.7)(197.98636, 608.4825)(198.91035, 1164.686)(217.15016, 2596.229)(222.0747, 742.08)(200.05713, 3430.97)(204.0686, 342.65)
5-O-METHYL-MYO-INOSITOL	sequoyitol	1	1	1	16097752	13950165	14727897	8529930	1	1	1	1	1	1	9104121	7024411	15149854	1	12675439	10394318	1	10312511	4792323	5624746	6260475	(194.08043, 656.3585)(177.06917, 174207.61)(178.0716, 14068.723)(180.078, 64.015)(179.08214, 19576.557)(180.08755, 732.68)(216.12155, 13460.989)(198.11076, 489.13715)(199.11066, 219.285)(217.06587, 2690.9404)(199.05257, 3958.1865)
METHYL-BETA-D-GALACTOSIDE	methyl-&beta;-D-galactoside	1	1	1	16097752	13950165	14727897	8529930	1	1	1	1	1	1	9104121	7024411	15149854	1	12675439	10394318	1	10312511	4792323	5624746	6260475	(194.08043, 656.3585)(177.06917, 174207.61)(178.0716, 14068.723)(180.078, 64.015)(179.08214, 19576.557)(180.08755, 732.68)(216.12155, 13460.989)(198.11076, 489.13715)(199.11066, 219.285)(217.06587, 2690.9404)(199.05257, 3958.1865)
4-METHYL-MYO-INOSITOL	D-ononitol	1	1	1	16097752	13950165	14727897	8529930	1	1	1	1	1	1	9104121	7024411	15149854	1	12675439	10394318	1	10312511	4792323	5624746	6260475	(194.08043, 656.3585)(177.06917, 174207.61)(178.0716, 14068.723)(180.078, 64.015)(179.08214, 19576.557)(180.08755, 732.68)(216.12155, 13460.989)(198.11076, 489.13715)(199.11066, 219.285)(217.06587, 2690.9404)(199.05257, 3958.1865)
CPD-3570	methyl &beta;-D-glucoside	1	1	1	16097752	13950165	14727897	8529930	1	1	1	1	1	1	9104121	7024411	15149854	1	12675439	10394318	1	10312511	4792323	5624746	6260475	(194.08043, 656.3585)(177.06917, 174207.61)(178.0716, 14068.723)(180.078, 64.015)(179.08214, 19576.557)(180.08755, 732.68)(216.12155, 13460.989)(198.11076, 489.13715)(199.11066, 219.285)(217.06587, 2690.9404)(199.05257, 3958.1865)
CPD-8046	D-pinitol	1	1	1	16097752	13950165	14727897	8529930	1	1	1	1	1	1	9104121	7024411	15149854	1	12675439	10394318	1	10312511	4792323	5624746	6260475	(194.08043, 656.3585)(177.06917, 174207.61)(178.0716, 14068.723)(180.078, 64.015)(179.08214, 19576.557)(180.08755, 732.68)(216.12155, 13460.989)(198.11076, 489.13715)(199.11066, 219.285)(217.06587, 2690.9404)(199.05257, 3958.1865)
FERULIC-ACID	ferulate	163290	1	1	1	1	102718	1	1	1	1	185080	190551	178924	1	1	1	1	1	1	1	111469	2612664	2537131	2361847	(194.5001, 26589.791)(194.30359, 1252.2826)(198.0621, 831.73)(175.0361, 5439.29)(194.0525, 1239.79)(181.0582, 1752.74)(211.5304, 33482.504)(213.09065, 10710.173)(214.58784, 11296.6)(215.0936, 522.98)(216.0939, 544.0)(194.08022, 75165.57)(195.08101, 10098.312)(197.08409, 5325.027)(218.0416, 86937.26)(201.03758, 660.9167)
CPD-12595	D-glucaro-1,5-lactone	1	252797	1	246502	271358	246538	299060	266481	1	1	215345	1	319440	312525	311826	1	258747	1	240025	250779	215504	476529	934268	201029	(195.02792, 307.17)(196.03583, 2039.62)(174.81577, 42346.65)(195.0286, 242.14)(175.01723, 53185.6)(176.30725, 2098.487)(178.02216, 424.78998)(179.0332, 1742.99)(214.0709, 11889.31)(196.059, 388.97)(215.01715, 3623.5215)(219.0258, 2416.48)(197.00574, 6844.534)(199.0038, 61.3)(201.0155, 4201.48)
CPD-16522	D-galactaro-1,4-lactone	1	252797	1	246502	271358	246538	299060	266481	1	1	215345	1	319440	312525	311826	1	258747	1	240025	250779	215504	476529	934268	201029	(195.02792, 307.17)(196.03583, 2039.62)(174.81577, 42346.65)(195.0286, 242.14)(175.01723, 53185.6)(176.30725, 2098.487)(178.02216, 424.78998)(179.0332, 1742.99)(214.0709, 11889.31)(196.059, 388.97)(215.01715, 3623.5215)(219.0258, 2416.48)(197.00574, 6844.534)(199.0038, 61.3)(201.0155, 4201.48)
CPD-13913	2-carboxy-L-xylonolactone	1	252797	1	246502	271358	246538	299060	266481	1	1	215345	1	319440	312525	311826	1	258747	1	240025	250779	215504	476529	934268	201029	(195.02792, 307.17)(196.03583, 2039.62)(174.81577, 42346.65)(195.0286, 242.14)(175.01723, 53185.6)(176.30725, 2098.487)(178.02216, 424.78998)(179.0332, 1742.99)(214.0709, 11889.31)(196.059, 388.97)(215.01715, 3623.5215)(219.0258, 2416.48)(197.00574, 6844.534)(199.0038, 61.3)(201.0155, 4201.48)
CPD-18127	2-hydroxy-4-[(1E)-3-oxoprop-1-en-1-yl]-2H-pyran-6-carboxylate	1	1	1	1	1	1	1	1	1	1	1	1	1	1	1	1	1	1	1	1	1	1	139535	163980	(195.02855, 833.325)(178.022, 305.88)(196.0362, 8069.5654)(197.0423, 335.59)(179.0333, 4061.09)(214.0713, 15817.189)(198.06369, 1186.405)(199.0568, 389.6)(200.07, 3784.44)(201.01575, 19584.164)(203.01431, 3623.22)
CPD-18126	(2E,4Z,5E)-2-hydroxy-7-oxo-(2-oxoethylidene)hepta-2,5-dienoate	1	1	1	1	1	1	1	1	1	1	1	1	1	1	1	1	1	1	1	1	1	1	139535	163980	(195.02855, 833.325)(178.022, 305.88)(196.0362, 8069.5654)(197.0423, 335.59)(179.0333, 4061.09)(214.0713, 15817.189)(198.06369, 1186.405)(199.0568, 389.6)(200.07, 3784.44)(201.01575, 19584.164)(203.01431, 3623.22)
CPD-18129	arabidopyl alcohol	1	1	1	1	1	1	1	1	1	1	1	1	1	1	1	1	1	1	1	1	1	1	139535	163980	(195.02855, 833.325)(178.022, 305.88)(196.0362, 8069.5654)(197.0423, 335.59)(179.0333, 4061.09)(214.0713, 15817.189)(198.06369, 1186.405)(199.0568, 389.6)(200.07, 3784.44)(201.01575, 19584.164)(203.01431, 3623.22)
CPD-18132	2-hydroxy-3-[(1E)-3-oxoprop-1-en-1-yl]-2H-pyran-6-carboxylate	1	1	1	1	1	1	1	1	1	1	1	1	1	1	1	1	1	1	1	1	1	1	139535	163980	(195.02855, 833.325)(178.022, 305.88)(196.0362, 8069.5654)(197.0423, 335.59)(179.0333, 4061.09)(214.0713, 15817.189)(198.06369, 1186.405)(199.0568, 389.6)(200.07, 3784.44)(201.01575, 19584.164)(203.01431, 3623.22)
CPD-18134	<i>iso</i>-arabidopyl alcohol	1	1	1	1	1	1	1	1	1	1	1	1	1	1	1	1	1	1	1	1	1	1	139535	163980	(195.02855, 833.325)(178.022, 305.88)(196.0362, 8069.5654)(197.0423, 335.59)(179.0333, 4061.09)(214.0713, 15817.189)(198.06369, 1186.405)(199.0568, 389.6)(200.07, 3784.44)(201.01575, 19584.164)(203.01431, 3623.22)
34-DIHYDROXYPHENYLPYRUVATE	3-(3,4-dihydroxyphenyl)pyruvate	1	1	1	1	1	1	1	1	1	1	1	1	1	1	1	1	1	1	1	1	1	1	139535	163980	(195.02855, 833.325)(178.022, 305.88)(196.0362, 8069.5654)(197.0423, 335.59)(179.0333, 4061.09)(214.0713, 15817.189)(198.06369, 1186.405)(199.0568, 389.6)(200.07, 3784.44)(201.01575, 19584.164)(203.01431, 3623.22)
CPD-8096	3,4,6-trihydroxy-cis-cinnamate	1	1	1	1	1	1	1	1	1	1	1	1	1	1	1	1	1	1	1	1	1	1	139535	163980	(195.02855, 833.325)(178.022, 305.88)(196.0362, 8069.5654)(197.0423, 335.59)(179.0333, 4061.09)(214.0713, 15817.189)(198.06369, 1186.405)(199.0568, 389.6)(200.07, 3784.44)(201.01575, 19584.164)(203.01431, 3623.22)
CPD-14430	7-hydroxy-8-methoxycoumarin	2768237	682120	1392697	5594861	1347022	2154624	2607962	2183660	3074301	968709	3604830	3662996	708171	726778	2065764	2022723	1629241	1829669	2440519	2690717	2629334	4142333	6834121	3471230	(195.0538, 1206.97)(197.0596, 171.17)(174.0358, 288.05)(195.53699, 10186.886)(194.0529, 905.23)(178.0504, 360.29666)(210.64888, 13213.667)(211.07256, 1012.53204)(192.06569, 27575.271)(193.06612, 2662.4548)(217.95427, 1142.715)(200.0329, 132.77333)
QUINATE	L-quinate	2722501	2658193	2819971	2489512	1668390	1	3619254	3866442	4193101	4091368	1	5727243	1292913	9808083	3077086	1	831598	1958462	2710171	3006596	2343513	703668	1023456	3541314	(195.05957, 3866.69)(174.04866, 1735.2767)(178.0592, 931.3)(192.06601, 25613.125)(193.0669, 1868.3617)(174.58853, 2460.268)(175.55678, 251.54874)(209.09225, 10232.66)(210.1044, 1816.84)(191.2706, 7349.1885)(194.0808, 16112.141)(195.093, 9124.0)(196.0956, 4681.1)(214.594, 780.85913)(215.0497, 1826.28)(217.0482, 127.82)(197.56378, 2468.4973)(199.04163, 1412.5099)
ALPHA-METHYL-TYROSINE	&alpha;-methyl-tyrosine	5851454	1826793	3278463	1850322	4986530	1543929	1683919	3980199	8661840	3675030	1129138	1482778	3057125	1	2942991	1	1481527	2822146	3811229	3381879	2910242	4374636	3502152	1	(195.85968, 21253.64)(198.95442, 3256.6145)(178.08015, 16281.117)(179.08063, 6807.33)(180.0899, 42940.57)(181.0935, 14276.98)(196.09613, 37287.945)(179.26259, 45863.01)(180.42285, 8075.5293)(182.59526, 1548.6284)(213.1923, 21704.494)(214.12018, 2978.4)(215.11935, 317.805)(196.31442, 37951.44)(199.1279, 854.47)(200.1245, 5018.94)(218.74886, 25087.773)(219.44855, 6486.591)(220.0991, 202.89)(200.386…
SELENOMETHIONINE	L-selenomethionine	12220083	1	9526118	2747169	1128540	2379634	1	9278376	2945108	9359860	8707019	9517150	9032108	1524719	9024751	962658	744438	9194802	154133	1	2929625	8067421	3651168	2259855	(195.87383, 6158.7285)(201.25352, 3443.506)(204.50934, 1152.9049)(204.0073, 2985.08)(179.62103, 15661.322)(182.72269, 18151.139)(186.21025, 6411.875)(185.99507, 4031.2102)(186.9952, 2982.21)(197.00455, 76147.52)(198.00487, 9037.044)(199.00143, 670.63464)(178.9914, 19201.58)(187.0005, 723.31)(213.60974, 1777.307)(217.52983, 2752.3801)(197.2424, 2018.2891)(218.18143, 2092.3623)(222.59013, 5911.282)…
TETRANITROMETHANE	tetranitromethane	133331	106129	104497	138416	126089	129784	94532	81742	75620	87454	92118	86629	1	1	1	114235	1	1	1	1	1	1	1	1	(195.97585, 6280.945)(197.9749, 340.11)(216.24164, 746.49695)(217.01251, 1362.6223)(196.68744, 1010.15076)(199.99931, 1345.86)(223.97192, 1157.5181)
L-DOPACHROME	L-dopachrome	9719998	2021490	5442608	26117820	6976248	2204471	7761128	5283542	1932135	2748471	6970847	7425623	152567	623466	3579603	670666	384890	4602729	2533806	14050215	16326557	8466344	7631749	738347	(196.03561, 95.23)(174.9757, 472881.88)(176.06833, 33435.77)(177.02722, 6221.463)(196.04688, 306.83)(177.035, 62.73)(212.43512, 8604.448)(213.40656, 3747.289)(193.39072, 1665.3967)(193.0524, 345.53)(215.01604, 11990.3125)(216.02115, 2700.575)(217.0151, 1836.46)(197.33897, 67371.914)(198.00484, 10124.906)(199.00133, 708.8689)
CPD0-1249	&gamma;-methylphosphinothricin	1	1	5733797	1	1	1	1	1	1	1	1	1	12863793	12435726	1	1169459	1	1	1	1	1340555	1	11171428	17462268	(196.06026, 6564.978)(178.05, 505.52)(198.07541, 28915.613)(199.07245, 946.18)(180.06442, 37390.88)(181.06429, 3150.2183)(212.09123, 159396.89)(213.09329, 19837.354)(214.09038, 1601.188)(194.08138, 19774.482)(195.07593, 2837.3953)(220.05745, 5978.0664)(221.0613, 1057.32)(201.04245, 877.71857)(202.80045, 2071.9175)
CPD0-1248	D,L-&alpha;-methylphosphinothricin	1	1	5733797	1	1	1	1	1	8483254	21184600	9814053	1	12863793	12435726	12535719	1169459	3519242	1547198	1	1	1340555	16985418	11171428	17462268	(196.06062, 6349.7173)(178.0497, 414.43668)(198.07545, 25513.744)(199.07559, 1130.65)(200.0745, 95.65)(180.0645, 39218.34)(181.065, 4062.8867)(212.09126, 139632.48)(213.09322, 17543.234)(214.09203, 1371.5883)(194.08113, 60772.293)(195.07666, 9650.012)(220.05739, 7383.0)(221.06087, 1036.1367)(201.35031, 975.6923)(202.76294, 1386.6185)(203.052, 3935.74)
[truncated: 2,828 more rows]
